# Supplementary material
Source: publisher figshare collection journal article supplement (https://acs.figshare.com/ndownloader/files/9680533)
Supplement: Supplementary file 1 [file 9680533]

## Sheet: PP2DPro 
Supplemental data S2, worksheet PP2DPro lists all non-redundant iTRAQ-quantified plasma proteins (FDR < 1%, obtained from combined triplicate LC-MS/MS dataset. The respective iTRAQ reporter ions of 114MI:113Ctrl , 115NMI:113Ctrl and 114MI:115NMI ratios for each protein were calculated and exported from ProteinPilot™ V4.1 software. Unused ProtScore > 2.02 correspond to FDR < 1% in combined searche…
Unused	Total	%Cov	%Cov(50)	%Cov(95)	Accession	Gene Name	Protein Description	Peptides(95%)	MI(114):Ctrl (113)	PVal MI(114):Ctrl (113)	EF MI(114):Ctrl (113)	LowerCI MI(114):Ctrl (113)	UpperCI MI(114):Ctrl (113)	NMI(115):Ctrl (113)	PVal NMI(115):Ctrl (113)	EF NMI(115):Ctrl (113)	LowerCI NMI(115):Ctrl (113)	UpperCI NMI(115):Ctrl (113)	MI (114):NMI(115)	PVal MI (114):NMI(115)	EF MI (114):NMI(115)	LowerCI MI (114):NMI(115)	UpperCI MI (114):NMI(115)
65.46	65.48	62.63	48.69	44.04	P04217	A1BG	Alpha-1B-glycoprotein	94	1.49969	0.8969	1.21339	1.23595	1.65959	1.07647	0.183223	1.07647	1	1.13763	1.39316	0.147326	1.15878	1.20226	1.57036
388.8	388.85	89.21	78.49	74.97	P01023	A2M	Alpha-2-macroglobulin	996	0.972747	0.0029988	1	0.972747	0.972747	1.04713	0.00358611	1	1.04713	1.04713	0.92045	9.34453e-11	1	0.92045	0.92045
4	4.38	35.55	1.7	0.5536	Q86UQ4	ABCA13	ATP-binding cassette sub-family A member 13	6	0.608135	0.133391	4.96592	0.121339	3.01995	0.801678	0.0774142	4.52898	0.135519	3.63078	0.698232	0.00953732	4.7863	0.131826	3.34195
2.03	2.08	54.67	2.278	1.367	Q9Y305	ACOT9	Acyl-coenzyme A thioesterase 9, mitochondrial	1	4.57088	0.49176	2.0893	2.18776	15.5597	3.0761	0.636164	1.88799	1.6293	8.47227	1.52757	0.767078	1.22462	1.24738	2.1677
37.07	37.37	80	57.87	52.53	P63261	ACTG1	Actin, cytoplasmic 2	53	0.554626	0.0182696	1.15878	0.47863	0.642688	0.119124	0.000121777	2.24905	0.0591562	0.267917	4.92039	0.00391288	2.12814	2.31206	10.0925
11.89	12.05	62.44	20.52	8.296	P12814	ACTN1	Alpha-actinin-1	7	0.787046	0.874424	1.21339	0.630957	0.954993	0.170608	0.0565994	2.37684	0.0751623	0.405508	5.01187	0.00513957	2.60615	1.92309	12.7057
4.02	4.02	28.69	9.426	9.426	Q15848	ADIPOQ	Adiponectin	2	0.313329	0.20913	2.10863	0.149969	0.660694	0.648634	0.476716	2.10863	0.310456	1.36773	0.47863	0.314348	2.10863	0.229087	1.00925
48.4	52.72	75.79	53.09	42.07	P43652	AFM	Afamin	47	4.52898	0.00010132	1.2942	3.49945	5.29664	7.44732	2.84556e-06	1.36773	5.44503	9.2045	0.554626	0.0580825	1.1272	0.49204	0.625173
48.9	49.04	72.37	61.65	56.08	P01019	AGT	Angiotensinogen	55	1.24738	0.307278	1.10662	1.1272	1.40605	0.405508	0.0524379	1.45881	0.251189	0.591562	2.96483	0.00781399	1.52757	1.94089	5.01187
52.28	54.49	71.39	66.49	50.68	P02765	AHSG	Alpha-2-HS-glycoprotein	104	0.990832	0.122963	1.00925	0.981748	1	1.02802	0.791107	1.00925	1.01859	1.03753	0.946237	0.00882181	1.00925	0.937562	0.954993
547.38	547.95	96.88	94.09	93.6	P02768	ALB	Serum albumin	1429	1.01859	0.432069	1	1.01859	1.01859	1.04713	5.86321e-06	1	1.04713	1.04713	0.963829	0.0158173	1	0.963829	0.963829
10.94	11.04	74.73	30.77	22.8	P04075	ALDOA	Fructose-bisphosphate aldolase A	7	1.09648	0.701676	1.33045	0.824138	1.51356	0.529663	0.0810235	1.52757	0.201372	0.809096	2.05116	0.118559	1.5417	1.33045	5.44503
2.05	2.33	48.9	14.29	8.242	P05062	ALDOB	Fructose-bisphosphate aldolase B	3	3.13329	0.28332	1.92309	1.6293	10	1.27057	0.643541	1.69044	0.751623	3.59749	2.48886	0.380331	2.07014	1.20226	6.08135
41.91	41.93	69.03	56.25	44.89	P02760	AMBP	Protein AMBP	57	18.197	0.00323019	1.87068	9.72747	21.8776	14.8594	0.0371157	1.92309	7.72681	17.7011	1.43219	0.0735174	1.11686	1.28233	1.6293
9.22	9.23	38.68	9.204	8.17	P15144	ANPEP	Aminopeptidase N	7	1.19124	0.429084	1.49969	0.794328	1.78649	0.946237	0.794989	1.8197	0.519996	1.72187	1.24738	0.329054	1.83654	0.679204	2.31206
19	19.1	50.67	39.46	35.43	P02743	APCS	Serum amyloid P-component	14	0.469894	0.0111629	1.39316	0.277971	0.654636	0.157036	0.000884885	2.1677	0.0824138	0.340408	3.0761	0.0297093	1.67494	1.83654	4.65586
6.08	6.23	49.04	16.35	9.856	Q9HDC9	APMAP	Adipocyte plasma membrane-associated protein	4	1.8197	0.41921	1.52757	1.19124	4.69894	0.879022	0.659647	1.65959	0.608135	1.45881	2.05116	0.325036	1.69044	1.21339	3.46737
92.27	94.29	95.13	91.01	87.27	P02647	APOA1	Apolipoprotein A-I	229	0.887156	0.00111505	1	0.879022	0.887156	0.912011	0.0227499	1	0.912011	0.912011	0.963829	0.0307321	1	0.963829	0.963829
33.5	33.5	80	70	70	P02652	APOA2	Apolipoprotein A-II	55	0.887156	0.285658	1.00925	0.879022	0.895365	0.954993	0.936874	1.00925	0.946237	0.963829	0.912011	0.0897618	1.00925	0.903649	0.92045
60.12	60.27	80.81	73.74	68.43	P06727	APOA4	Apolipoprotein A-IV	84	0.15417	0.00022514	1.6293	0.118032	0.251189	1.59956	0.245696	1.15878	1.38038	1.83654	0.101859	1.26022e-05	1.80302	0.0744732	0.183654
671.34	671.34	81.33	66.47	59.83	P04114	APOB	Apolipoprotein B-100	708	1	0.406613	1	1	1	0.946237	0	1	0.946237	0.946237	1.04713	0	1	1.04713	1.04713
6.97	7.23	86.75	55.42	49.4	P02654	APOC1	Apolipoprotein C-I	8	0.515229	0.606162	1.22462	0.359749	0.630957	0.895365	0.969041	1.14815	0.772681	1.02802	0.564937	0.344858	1.20226	0.383707	0.679204
14.07	14.08	75.25	75.25	66.34	P02655	APOC2	Apolipoprotein C-II	23	1.25892	0.744522	1.18032	1.0666	1.58489	1.02802	0.958958	1.15878	0.887156	1.18032	1.20226	0.783042	1.1695	1.02802	1.41906
12.02	12.02	62.63	51.52	51.52	P02656	APOC3	Apolipoprotein C-III	36	0.946237	0.699034	1.01859	0.928966	0.963829	0.990832	0.842406	1.01859	0.972747	1.00925	0.954993	0.838835	1.02802	0.928966	0.981748
6.67	6.67	62.99	39.37	33.86	P55056	APOC4	Apolipoprotein C-IV	5	1.83654	0.0363781	1.30617	1.40605	2.72898	1.43219	0.060576	1.23595	1.15878	1.80302	1.28233	0.64085	1.1695	1.09648	1.65959
11.72	11.79	49.74	33.33	25.93	P05090	APOD	Apolipoprotein D	10	0.855067	0.860527	1.1695	0.724436	1	0.946237	0.919752	1.13763	0.758578	1.07647	0.887156	0.781713	1.13763	0.77983	1.00925
31.49	31.54	67.82	46.06	43.53	P02649	APOE	Apolipoprotein E	44	1.47231	0.192636	1.21339	1.21339	1.67494	0.42462	0.0953556	1.49969	0.319154	0.636796	3.31131	0.00827244	1.7378	1.90546	4.65586
4.21	4.21	49.08	14.72	14.72	Q13790	APOF	Apolipoprotein F	7	0.83946	0.921092	1.34276	0.613762	1.1272	0.30479	0.602241	2.01372	0.159956	0.613762	2.72898	0.553073	1.78649	1.52757	4.36516
43.05	43.2	86.38	59.71	57.1	P02749	APOH	Beta-2-glycoprotein 1	69	6.42688	0.000161118	1.7378	3.69828	10.2802	4.52898	0.00335337	1.69044	2.67917	6.66807	1.45881	0.0433657	1.10662	1.31826	1.67494
17.12	17.2	53.27	31.66	22.36	O14791	APOL1	Apolipoprotein L1	20	1.14815	0.898117	1.1272	1.01859	1.2942	0.539511	0.0557609	1.38038	0.353183	0.744732	2.12814	0.06953	1.47231	1.44544	3.31131
26.8	26.86	80.85	75.53	72.34	O95445	APOM	Apolipoprotein M	20	1.01859	0.864358	1.1695	0.870964	1.23595	1	0.994962	1.1695	0.855067	1.21339	1.05682	0.820056	1.14815	0.92045	1.20226
38.29	38.29	55.91	23.72	21.55	O75882	ATRN	Attractin	29	4.01791	0.123957	2.12814	1.88799	7.17794	3.80189	0.116321	1.99526	1.90546	6.30957	1	0.857498	1.11686	0.895365	1.11686
42.7	42.76	71.14	56.04	54.03	P25311	AZGP1	Zinc-alpha-2-glycoprotein	35	0.963829	0.844531	1.10662	0.862979	1.0666	0.409261	0.0300257	1.55597	0.280543	0.636796	2.48886	0.0432233	1.6293	1.52757	3.43558
4.3	5.1	60.5	29.41	21.85	P61769	B2M	Beta-2-microglobulin	3	0.928966	0.359698	1.51356	0.630957	1.40605	0.591562	0.377778	1.61436	0.285759	0.954993	1.52757	0.970892	1.6293	0.937562	3.63078
2.03	3.82	41.31	5.793	4.786	Q9NY97	B3GNT2	UDP-GlcNAc:betaGal beta-1,3-N-acetylglucosaminyltransferase 2	2	2.70396	0.270596	4.74242	0.570164	12.8233	4.40555	0.190332	4.87529	0.903649	21.2814	0.591562	0.488961	4.48745	0.133045	2.65461
14.76	14.78	49.34	26.91	20.6	P06276	BCHE	Cholinesterase	11	1.13763	0.752757	1.25892	0.903649	1.39316	0.928966	0.519647	1.22462	0.751623	1.13763	1.15878	0.656414	1.24738	0.928966	1.43219
4.02	4.02	37.38	16.02	12.14	P30043	BLVRB	Flavin reductase	2	1.70608	0.396267	2.0893	0.816582	3.59749	1.27057	0.636094	2.0893	0.608135	2.67917	1.33045	0.59024	2.0893	0.636796	2.77971
14.06	14.11	52.85	16.57	16.57	P43251	BTD	Biotinidase	11	1.90546	0.483753	1.43219	1.33045	3.25087	2.01372	0.258704	1.43219	1.40605	3.53183	0.928966	0.569619	1.20226	0.765597	1.11686
2.05	2.08	40.71	2.507	1.032	C9JLR9	C11orf95	Uncharacterized protein C11orf95	1	0.0244343	0.0689511	28.3139	0.0100925	0.691831	0.613762	0.457068	2.0893	0.291072	1.28233	0.030761	0.0320978	29.1072	0.0100925	0.895365
2.04	2.05	21.58	1.809	1.163	Q86TY3	C14orf37	Uncharacterized protein C14orf37	1	0.380189	0.383752	2.22844	0.0737904	0.847227	0.37325	0.410198	2.39883	0.0816582	0.895365	1.04713	0.922746	2.26987	0.461318	3.87258
13.38	13.39	65.31	36.33	34.29	P02745	C1QA	Complement C1q subcomponent subunit A	17	3.7325	0.867227	2.33346	1.59956	6.13762	3.56451	0.776938	2.29087	1.55597	6.19441	1.0666	0.908663	1.24738	0.855067	1.34276
13.17	15.01	59.29	31.23	26.48	P02746	C1QB	Complement C1q subcomponent subunit B	20	0.963829	0.87095	1.19124	0.809096	1.14815	0.591562	0.281361	1.39316	0.316228	0.824138	1.59956	0.226645	1.35519	1.18032	3.16228
15.73	15.75	63.67	28.98	28.98	P02747	C1QC	Complement C1q subcomponent subunit C	20	3.19154	0.8911	1.78649	1.78649	6.60694	1.65959	0.593594	1.44544	1.14815	2.93765	1.95885	0.377939	1.36773	1.43219	2.70396
53.78	53.79	64.82	42.84	39.86	P00736	C1R	Complement C1r subcomponent	50	5.80764	0.000345165	1.94089	2.99226	11.1686	3.56451	0.29583	1.78649	1.99526	6.30957	1.69044	0.00188616	1.15878	1.45881	2.03236
15.83	22.02	58.73	31.42	27.31	Q9NZP8	C1RL	Complement C1r subcomponent-like protein	14	1.44544	0.661452	1.39316	1.03753	1.92309	2.46604	0.292946	1.85353	1.33045	3.40408	0.608135	0.562422	1.45881	0.448745	0.887156
28.07	30.09	53.05	37.06	30.81	P09871	C1S	Complement C1s subcomponent	35	3.69828	1.95134e-05	1.85353	1.99526	6.48634	1.69044	0.529435	1.39316	1.21339	2.01372	2.22844	9.25563e-05	1.40605	1.58489	3.56451
41.1	43.89	72.74	38.56	33.24	P06681	C2	Complement C2	38	1.80302	0.0101905	1.24738	1.44544	2.26987	0.855067	0.702231	1.08643	0.794328	0.928966	2.05116	0.00398939	1.25892	1.6293	2.70396
365.69	365.7	89.36	81.24	76.43	P01024	C3	Complement C3	772	1.03753	5.10174e-11	1	1.03753	1.03753	1	0.800668	1	1	1	1.02802	6.66134e-16	1	1.02802	1.02802
276.18	277.3	83.72	74.71	69.44	P0C0L5	C4B	Complement C4-B	478	1.11686	1.12773e-09	1.00925	1.10662	1.1272	1.09648	1.1674e-09	1	1.09648	1.09648	1.00925	0.256365	1	1.00925	1.00925
74.95	75.39	78.39	68.34	65.33	P04003	C4BPA	C4b-binding protein alpha chain	104	1.25892	2.6066e-09	1.00925	1.24738	1.27057	1.1695	2.45522e-06	1.00925	1.15878	1.18032	1.0666	0.000533158	1.00925	1.05682	1.07647
12.49	13.07	53.97	46.83	28.17	P20851	C4BPB	C4b-binding protein beta chain	10	10.5682	0.0269241	1.72187	6.13762	16.293	10.4713	0.0380164	1.83654	5.70164	15.9956	1.13763	0.20727	1.1695	0.972747	1.31826
125.61	127.67	70.11	54.71	48.63	P01031	C5	Complement C5	118	1.55597	0.126262	1.21339	1.28233	1.72187	0.847227	0.0370236	1.05682	0.794328	0.895365	1.8197	0.00102386	1.24738	1.45881	2.14783
46.17	46.19	74.3	40.47	33.19	P13671	C6	Complement component C6	57	5.54626	6.28531e-05	1.95885	2.83139	8.09096	2.80543	0.137079	1.70608	1.64437	3.63078	2.05116	1.10321e-05	1.22462	1.67494	2.55859
56.31	56.32	66.55	52.67	47.81	P10643	C7	Complement component C7	67	4.40555	0.00958376	1.6293	2.70396	5.54626	4.13048	0.0132449	1.57036	2.63027	5.05825	1.0666	0.733614	1.08643	0.981748	1.1695
2.16	2.34	27.59	3.276	1.207	Q8WVR3	C7orf43	Uncharacterized protein C7orf43	2	0.255859	0.446258	2.37684	0.0529663	0.608135	0.244343	0.406664	2.85759	0.0794328	0.698232	0.954993	0.897986	2.39883	0.376704	2.29087
18.81	18.82	53.77	21.75	20.72	P07357	C8A	Complement component C8 alpha chain	19	4.65586	0.0107095	1.83654	2.53513	6.19441	2.48886	0.206909	1.44544	1.72187	2.99226	1.88799	0.110167	1.33045	1.41906	2.35505
46.29	46.31	67.68	43.82	39.09	P07358	C8B	Complement component C8 beta chain	42	2.01372	0.109309	1.30617	1.5417	2.91072	1.41906	0.882285	1.24738	1.13763	1.85353	1.44544	0.0189733	1.14815	1.25892	1.70608
16.73	16.73	65.35	49.5	49.01	P07360	C8G	Complement component C8 gamma chain	17	1.45881	0.181195	1.33045	1.09648	1.99526	0.937562	0.700806	1.30617	0.737904	1.22462	1.64437	0.0731525	1.41906	1.15878	2.37684
33.31	33.9	62.97	36.49	33.63	P02748	C9	Complement component C9	35	3.98107	9.16681e-05	1.28233	3.10456	4.96592	0.895365	0.371564	1.18032	0.691831	1.05682	4.57088	2.483e-05	1.47231	3.10456	6.79204
6.22	6.33	66.67	25.67	11.88	P00915	CA1	Carbonic anhydrase 1	4	1.97697	0.171186	1.61436	1.22462	4.05509	0.401791	0.624145	1.95885	0.258226	0.787046	4.92039	0.0963263	2.70396	1.8197	9.63829
2.05	2.05	34.77	3.357	3.357	P27797	CALR	Calreticulin	1	0.879022	0.811207	2.60615	0.334195	2.29087	0.862979	0.816927	2.60615	0.328095	2.24905	1.00925	0.993764	1.58489	0.636796	1.6293
2.02	2.08	50	7.647	5.294	P49913	CAMP	Cathelicidin antimicrobial peptide	1	4.7863	0.23076	2.91072	1.64437	18.5353	1.55597	0.68904	2.208	0.704693	5.10505	3.01995	0.282281	2.60615	1.15878	8.31764
6.65	6.73	49.89	18.53	7.789	Q01518	CAP1	Adenylyl cyclase-associated protein 1	5	0.912011	0.649294	1.55597	0.586138	1.41906	0.744732	0.669499	1.61436	0.398107	1.20226	1.1695	0.123914	1.61436	0.724436	2.22844
5.42	5.46	54.65	10.63	9.677	P04040	CAT	Catalase	4	1.28233	0.614367	3.53183	0.363078	4.52898	1.08643	0.861966	2.22844	0.487529	2.42103	1.1695	0.719082	1.58489	0.737904	1.85353
14.08	14.11	52	34.93	34.93	P08571	CD14	Monocyte differentiation antigen CD14	16	2.77971	0.264975	1.65959	1.67494	5.39511	1.61436	0.238788	1.38038	1.1695	2.96483	1.72187	0.598017	1.31826	1.30617	2.24905
2.28	2.44	32.96	5.882	3.287	Q86VB7	CD163	Scavenger receptor cysteine-rich type 1 protein M130	3	1.14815	0.668998	11.1686	0.102802	12.8233	1.20226	0.592703	12.2462	0.0981748	14.8594	0.946237	0.891733	2.0893	0.452898	1.97697
2.02	2.12	30.72	4.873	3.814	P16671	CD36	Platelet glycoprotein 4	2	0.515229	0.674981	1.99526	0.151356	1.02802	1.13763	0.927315	1.88799	0.60256	2.14783	0.436516	0.622122	2.24905	0.147231	0.981748
3.14	3.16	34.64	4.717	4.178	P16070	CD44	CD44 antigen	3	1.45881	0.692306	1.47231	0.990832	2.39883	0.981748	0.751141	1.40605	0.691831	1.38038	1.47231	0.942398	1.47231	1	2.65461
17.24	17.24	45.24	31.41	27.95	O43866	CD5L	CD5 antigen-like	19	1.92309	0.07317	1.51356	1.27057	4.61318	1.70608	0.142875	1.47231	1.15878	3.66438	1.1272	0.734213	1.11686	1.00925	1.34276
6.05	6.67	34.08	7.854	7.153	P55290	CDH13	Cadherin-13	5	3.80189	0.258441	2.42103	1.57036	55.4626	4.09261	0.284118	2.85759	1.43219	51.5229	0.954993	0.852117	1.33045	0.724436	1.27057
6.05	6.11	39.54	8.291	5.867	P33151	CDH5	Cadherin-5	4	0.92045	0.472921	1.20226	0.765597	1.10662	0.928966	0.371856	1.24738	0.744732	1.15878	0.981748	0.980214	1.21339	0.809096	1.19124
4.54	4.55	37.53	11.36	7.911	P11597	CETP	Cholesteryl ester transfer protein	4	0.666807	0.479263	1.57036	0.363078	1.04713	0.737904	0.610623	1.57036	0.405508	1.15878	0.887156	0.815972	1.55597	0.554626	1.38038
94.8	97.17	80.89	60.34	54.84	P00751	CFB	Complement factor B	138	1.15878	2.64085e-06	1.00925	1.14815	1.1695	1.0666	0.0902316	1.00925	1.05682	1.07647	1.0666	0.000275712	1.00925	1.05682	1.07647
15.41	15.48	56.13	40.32	37.15	P00746	CFD	Complement factor D	10	1.69044	0.106183	1.49969	1.1272	2.67917	1.20226	0.389505	1.34276	0.895365	1.75388	1.45881	0.437745	1.36773	1.0666	2.12814
125.98	126	81.88	65.56	63.28	P08603	CFH	Complement factor H	230	1.1272	1.89154e-06	1.00925	1.11686	1.13763	1.09648	1.04088e-05	1.00925	1.08643	1.10662	1.01859	0.0933087	1.00925	1.00925	1.02802
7.51	7.62	54.66	15.47	10.02	Q9BXR6	CFHR5	Complement factor H-related protein 5	7	5.01187	0.295883	2.1677	2.31206	19.2309	1.67494	0.70488	1.75388	0.954993	6.42688	3.22107	0.0551446	1.70608	1.88799	5.44503
24.93	25.11	64.84	37.56	29.67	P05156	CFI	Complement factor I	23	3.80189	0.105489	1.72187	2.208	5.34564	3.04789	0.0187701	1.67494	1.8197	4.16869	1.2942	0.789035	1.10662	1.1695	1.45881
11.08	11.13	42.22	19.19	15.14	P27918	CFP	Properdin	7	3.87258	0.0216509	1.64437	2.35505	24.8886	4.16869	0.00617688	1.64437	2.53513	27.7971	0.92045	0.713638	1.1272	0.801678	1.03753
10.72	10.74	40.4	10.84	9.437	O00533	CHL1	Neural cell adhesion molecule L1-like protein	9	0.597035	0.0576156	1.61436	0.340408	0.963829	0.765597	0.540861	2.67917	0.283139	2.05116	0.765597	0.534054	2.51189	0.301995	1.92309
17.57	17.62	69.31	49.5	47.52	P05452	CLEC3B	Tetranectin	13	1.6293	0.778918	1.40605	1.15878	3.28095	2.29087	0.707726	1.57036	1.45881	5.05825	0.660694	0.410201	1.30617	0.49204	0.862979
2.89	3	65.15	16.6	8.714	O00299	CLIC1	Chloride intracellular channel protein 1	2	0.801678	0.700323	2.72898	0.296483	2.18776	0.744732	0.600295	2.72898	0.272898	2.03236	1.05682	0.863995	2.0893	0.505825	2.33346
39.56	39.65	71.94	53.23	45.66	P10909	CLU	Clusterin	61	0.724436	0.75643	1.14815	0.625173	0.831764	0.691831	0.406666	1.1695	0.539511	0.809096	1.07647	0.611948	1.10662	0.972747	1.19124
18.14	18.3	55.82	28.6	22.49	Q96KN2	CNDP1	Beta-Ala-His dipeptidase	13	0.809096	0.384445	1.1695	0.666807	0.946237	0.554626	0.088776	1.39316	0.405508	0.772681	1.43219	0.35231	1.2942	1.10662	1.80302
4.21	4.4	53.4	12.3	10.36	Q99439	CNN2	Calponin-2	3	1.01859	0.775067	1.33045	0.765597	1.35519	1	0.881898	1.58489	0.630957	1.58489	1.00925	0.676726	1.24738	0.809096	1.25892
2.01	2.02	34.3	2.736	0.3367	A5YKK6	CNOT1	CCR4-NOT transcription complex subunit 1	1	0.515229	0.0670501	1.75388	0.16293	0.903649	0.496592	0.157363	1.55597	0.145881	0.772681	1.05682	0.283658	1.88799	0.559758	1.99526
2.02	2.03	31.45	3.495	3.495	P26992	CNTFR	Ciliary neurotrophic factor receptor subunit alpha	1	2.03236	0.318352	2.0893	0.972747	4.2462	1.31826	0.599471	2.0893	0.630957	2.75423	1.52757	0.469022	2.0893	0.731139	3.19154
3.48	3.5	45.58	2.456	1.473	Q12860	CNTN1	Contactin-1	2	0.524808	0.353662	3.98107	0.133045	2.0893	0.847227	0.75361	2.0893	0.405508	1.77011	0.619441	0.441401	4.44631	0.138038	2.75423
2.08	2.11	32.1	3.079	1.881	P39060	COL18A1	Collagen alpha-1(XVIII) chain	3	1.51356	0.199494	2.208	0.685488	3.59749	1.02802	0.685655	2.46604	0.416869	2.53513	1.47231	0.142488	2.63027	0.559758	3.98107
14.01	14.03	61.61	14.07	10.31	P02452	COL1A1	Collagen alpha-1(I) chain	12	0.809096	0.380074	4.52898	0.167494	3.66438	1.05682	0.882879	3.59749	0.293765	3.87258	0.751623	0.421002	4.52898	0.143219	3.40408
6.07	6.08	45.86	4.879	3.305	P12111	COL6A3	Collagen alpha-3(VI) chain	8	0.444631	0.485024	1.55597	0.172187	0.691831	0.870964	0.705355	1.27057	0.685488	1.10662	0.510505	0.192537	1.47231	0.185353	0.751623
2.17	2.17	41.33	11.07	8.856	Q9BWP8	COLEC11	Collectin-11	2	2.75423	0.235237	27.7971	0.0990832	33.1131	0.879022	0.83303	9.72747	0.0903649	8.55067	3.25087	0.2148	8.3946	0.387258	21.677
6.07	6.14	35.67	10.04	9.115	P49747	COMP	Cartilage oligomeric matrix protein	6	0.165959	0.0275891	5.91562	0.0359749	0.981748	0.49204	0.154543	4.57088	0.107647	2.24905	0.534564	0.067335	4.87529	0.114815	2.60615
7.27	7.32	35.86	10.34	9.283	Q9ULV4	CORO1C	Coronin-1C	5	0.510505	0.338432	2.0893	0.242103	1.0666	0.301995	0.202454	2.0893	0.143219	0.630957	1.67494	0.40875	2.10863	0.794328	3.49945
165.61	165.91	91.92	67.32	64.88	P00450	CP	Ceruloplasmin	319	0.990832	0.363412	1.00925	0.981748	1	0.92045	0.00252669	1.00925	0.912011	0.928966	1.0666	8.58483e-07	1.00925	1.05682	1.07647
13.77	13.83	52.48	36.88	30.73	Q96IY4	CPB2	Carboxypeptidase B2	15	2.83139	0.408914	1.67494	1.69044	4.87529	2.31206	0.774207	1.59956	1.44544	3.59749	1.22462	0.377857	1.20226	1.01859	1.48594
17.39	17.83	53.93	35.59	33.84	P15169	CPN1	Carboxypeptidase N catalytic chain	14	1.35519	0.65609	1.1695	1.15878	1.6293	0.654636	0.330225	1.25892	0.452898	0.824138	1.99526	0.174182	1.30617	1.52757	3.31131
38.2	38.34	57.98	37.06	35.78	P22792	CPN2	Carboxypeptidase N subunit 2	37	1.6293	0.0290478	1.23595	1.31826	1.97697	0.394457	0.450456	1.5417	0.283139	0.608135	3.90841	0.00342423	1.75388	2.22844	6.13762
4.86	4.98	49.39	15.92	12.65	P54108	CRISP3	Cysteine-rich secretory protein 3	3	1.00925	0.984482	2.05116	0.49204	2.48886	0.903649	0.868655	2.01372	0.457088	1.8197	1.11686	0.88382	1.90546	0.586138	2.46604
4.62	4.63	20.98	17.86	17.86	P02741	CRP	C-reactive protein	3	10.8643	0.00227368	1.49969	7.24436	17.5388	0.390841	0.227499	1.44544	0.246604	0.564937	21.8776	0.0404526	1.59956	13.6773	41.3047
5	5.01	39.94	6.959	4.539	Q9NQ79	CRTAC1	Cartilage acidic protein 1	3	0.60256	0.453767	1.52757	0.190546	0.92045	0.515229	0.327122	1.83654	0.258226	0.946237	1.08643	0.777018	1.94089	0.559758	1.85353
2.02	2.03	51.3	5.181	5.181	P21291	CSRP1	Cysteine and glycine-rich protein 1	1	0.765597	0.628749	2.0893	0.366438	1.59956	0.698232	0.533347	2.0893	0.334195	1.45881	1.08643	0.849644	2.0893	0.519996	2.26987
2.29	2.31	52.05	19.86	19.86	P01034	CST3	Cystatin-C	2	1.69044	0.597531	1.35519	1.24738	3.25087	1.33045	0.758027	1.41906	0.937562	2.29087	1.27057	0.795378	1.35519	0.937562	1.88799
3.32	3.41	36.1	14.81	9.091	Q01459	CTBS	Di-N-acetylchitobiase	2	1.45881	0.809012	4.40555	0.331131	6.48634	1.22462	0.912872	4.44631	0.275423	5.44503	1.18032	0.732361	1.38038	0.855067	1.6293
4.27	4.3	44.17	14.81	13.59	P07339	CTSD	Cathepsin D	4	0.847227	0.684494	10.0925	0.083946	8.55067	1.23595	0.403685	7.11213	0.17378	8.70964	0.685488	0.308379	2.0893	0.328095	1.43219
12.24	12.58	39.22	19.29	13.78	P09172	DBH	Dopamine beta-hydroxylase	7	0.824138	0.283285	1.49969	0.549541	1.23595	0.903649	0.354616	1.35519	0.666807	1.22462	0.903649	0.962366	1.47231	0.613762	1.33045
3.31	3.33	37.23	19.15	19.15	P59666	DEFA3	Neutrophil defensin 3	2	14.5881	0.111442	3.40408	4.28548	56.4937	12.3595	0.116846	3.19154	3.87258	58.6138	1.1272	0.833867	1.33045	0.847227	1.51356
2.08	2.08	34.07	2.759	0.9655	Q8NEP3	DNAAF1	Dynein assembly factor 1, axonemal	1	2.14783	0.0243569	1.33045	1.61436	4.13048	0.787046	0.0417454	1.45881	0.359749	1.14815	2.65461	0.0582628	1.5417	1.72187	8.31764
2.03	4.03	55.93	2.373	2.373	Q9H1R2	DUSP15	Dual specificity protein phosphatase 15	2	1.07647	0.973734	12.942	0.0831764	13.9316	1.05682	0.999032	19.4089	0.0544503	19.4089	1.00925	0.9747	3.56451	0.283139	3.59749
2.04	2.14	31.46	4.636	3.311	P42126	ECI1	Enoyl-CoA delta isomerase 1, mitochondrial	1	0.549541	0.362659	9.28966	0.0586138	5.10505	0.310456	0.229825	22.6987	0.0296483	7.04693	1.75388	0.473383	23.5505	0.0744732	25.8226
16.26	16.29	66.85	27.41	25	Q16610	ECM1	Extracellular matrix protein 1	11	0.229087	0.454668	2.75423	0.145881	0.630957	0.432514	0.452263	1.78649	0.263027	0.772681	0.440555	0.553948	2.05116	0.283139	0.903649
6.95	6.95	39.35	15.62	14.6	Q12805	EFEMP1	EGF-containing fibulin-like extracellular matrix protein 1	7	2.26987	0.363373	1.44544	1.57036	3.69828	1.77011	0.571511	4.40555	0.401791	7.87046	1.28233	0.586204	4.09261	0.313329	5.39511
2.04	2.27	35.33	5.421	4.673	Q9NZN3	EHD3	EH domain-containing protein 3	2	0.440555	0.28648	2.0893	0.210863	0.92045	0.642688	0.465453	2.0893	0.30479	1.34276	0.679204	0.514562	2.10863	0.325087	1.43219
5.26	5.69	65.67	24.42	17.51	P06733	ENO1	Alpha-enolase	6	1.57036	0.675923	1.87068	0.83946	4.92039	0.862979	0.800273	1.80302	0.505825	1.55597	1.8197	0.12942	1.6293	1.11686	6.19441
18.55	19.74	56.35	21.11	18.85	P00742	F10	Coagulation factor X	14	9.37562	0.0608995	2.07014	4.52898	14.5881	9.72747	0.224409	2.10863	4.61318	15.9956	0.981748	0.702406	1.1695	0.83946	1.14815
17.88	19.03	58.24	32.32	27.84	P03951	F11	Coagulation factor XI	17	4.44631	0.0238692	1.92309	2.31206	10	3.83707	0.0806364	1.87068	2.05116	9.37562	1.10662	0.350003	1.15878	0.954993	1.2942
47.18	49.33	71.06	54.31	50.24	P00748	F12	Coagulation factor XII	43	3.04789	0.0474513	1.58489	1.92309	4.69894	4.65586	0.000331532	1.78649	2.60615	8.95365	0.630957	0.00609316	1.20226	0.440555	0.758578
33.11	33.13	59.02	36.07	31.69	P00488	F13A1	Coagulation factor XIII A chain	22	0.946237	0.328078	1.13763	0.824138	1.07647	0.691831	0.0791154	1.19124	0.474242	0.824138	1.36773	0.21092	1.20226	1.13763	1.75388
36.15	36.16	71.56	43.12	34.49	P05160	F13B	Coagulation factor XIII B chain	22	3.87258	0.0549086	1.92309	2.01372	8.3946	3.63078	0.0305872	1.92309	1.88799	7.17794	1.10662	0.697308	1.1272	0.981748	1.28233
36.15	36.16	71.56	43.12	34.49	P05160	F13B	Coagulation factor XIII B chain	22	3.87258	0.0549086	1.92309	2.01372	8.3946	3.63078	0.0305872	1.92309	1.88799	7.17794	1.10662	0.697308	1.1272	0.981748	1.28233
78.44	80.49	75.88	63.83	59.16	P00734	F2	Prothrombin	137	3.59749	0.00206197	1.35519	2.65461	3.98107	2.42103	0.119731	1.24738	1.94089	2.63027	1.59956	0.00999044	1.14815	1.39316	1.77011
28.85	28.87	45.14	18.3	13.53	P12259	F5	Coagulation factor V	29	2.05116	0.053789	1.41906	1.44544	3.87258	1.51356	0.0945376	1.2942	1.1695	2.51189	1.36773	0.109947	1.20226	1.13763	1.92309
6.57	7.51	36.27	16.31	16.31	P08709	F7	Coagulation factor VII	6	1.39316	0.938267	2.33346	0.597035	3.37287	0.138038	0.36864	3.94457	0.0559758	0.544503	8.70964	0.350891	4.32514	2.01372	30.1995
23.68	24	60.74	28.63	26.9	P00740	F9	Coagulation factor IX	18	3.16228	0.0522114	1.72187	1.83654	5.7544	2.44343	0.0510709	1.59956	1.52757	3.69828	1.28233	0.327147	1.1695	1.09648	1.55597
18.7	18.88	53.49	25.46	19.35	P23142	FBLN1	Fibulin-1	21	1.13763	0.26304	1.21339	0.937562	1.51356	1.27057	0.471555	1.2942	0.981748	1.61436	0.912011	0.969367	1.21339	0.758578	1.10662
43.09	43.1	36.02	15.99	13.86	Q9Y6R7	FCGBP	IgGFc-binding protein	35	3.19154	0.0276171	1.40605	2.26987	4.2462	2.46604	0.227879	1.39316	1.77011	3.43558	1.34276	0.201904	1.19124	1.1272	1.58489
4.64	4.66	35.83	12.2	12.2	P08637	FCGR3A	Low affinity immunoglobulin gamma Fc region receptor III-A	3	1.11686	0.637766	1.83654	0.608135	2.12814	1.1272	0.562537	2.05116	0.549541	2.33346	0.990832	0.885989	1.92309	0.515229	1.90546
22.18	22.18	59.87	50.17	46.82	O75636	FCN3	Ficolin-3	24	1.58489	0.0688659	1.2942	1.22462	2.22844	0.737904	0.796495	1.25892	0.613762	0.928966	2.14783	0.0492836	1.51356	1.41906	2.93765
7.51	9.58	47.08	11.99	10.04	Q86UX7	FERMT3	Fermitin family homolog 3	6	0.787046	0.572731	1.25892	0.60256	0.990832	0.231207	0.0840811	1.92309	0.0879023	0.444631	3.46737	0.124768	1.95885	1.77011	8.87156
9.08	9.11	51.83	27.49	19.11	Q9UGM5	FETUB	Fetuin-B	11	2.0893	0.420235	1.44544	1.44544	4.36516	2.26987	0.575027	1.55597	1.45881	4.05509	0.946237	0.866372	1.21339	0.787046	1.14815
143.1	143.15	73.44	56.12	51.39	P02671	FGA	Fibrinogen alpha chain	374	0.981748	0.382797	1.00925	0.972747	0.990832	0.990832	0.955685	1.00925	0.981748	1	0.972747	0.278274	1.00925	0.963829	0.981748
107.09	107.17	86.56	72.51	70.67	P02675	FGB	Fibrinogen beta chain	308	1.02802	0.397391	1.00925	1.01859	1.03753	1.03753	0.950081	1.00925	1.02802	1.04713	0.981748	0.361578	1.00925	0.972747	0.990832
95.97	96.28	88.74	70.2	56.51	P02679	FGG	Fibrinogen gamma chain	238	0.954993	0.201261	1.00925	0.946237	0.963829	0.981748	0.767289	1.00925	0.972747	0.990832	0.963829	0.100675	1.00925	0.954993	0.972747
54.35	54.36	50.96	20.82	18.13	P21333	FLNA	Filamin-A	36	0.879022	0.00369407	1.10662	0.751623	0.972747	0.293765	1.85863e-08	1.57036	0.170608	0.461318	3.25087	6.8928e-08	1.75388	1.85353	5.44503
91.92	91.93	55.91	36.8	32.1	P02751	FN1	Fibronectin	79	0.847227	4.17419e-07	1.01859	0.831764	0.862979	0.855067	4.46754e-13	1.00925	0.847227	0.862979	0.981748	0.155265	1.00925	0.972747	0.990832
4.87	4.89	33.47	4.449	4.025	Q14697	GANAB	Neutral alpha-glucosidase AB	3	0.895365	0.840067	2.0893	0.428549	1.87068	1.1272	0.802296	2.0893	0.539511	2.35505	0.787046	0.666556	2.10863	0.376704	1.65959
16.37	16.5	74.63	39.7	31.34	P04406	GAPDH	Glyceraldehyde-3-phosphate dehydrogenase	13	0.539511	0.367157	1.64437	0.349945	0.887156	0.496592	0.0708529	1.55597	0.265461	0.772681	1.18032	0.0618265	1.45881	0.809096	1.83654
75.75	76.01	83.76	56.75	48.1	P02774	GC	Vitamin D-binding protein	98	1.00925	0.57073	1.00925	1	1.01859	0.990832	0.722191	1.00925	0.981748	1	1.00925	0.13187	1.00925	1	1.01859
2.27	2.33	38.65	8.539	4.27	P50395	GDI2	Rab GDP dissociation inhibitor beta	1	1.0666	0.782047	1.18032	0.903649	1.25892	1.13763	0.588638	1.22462	0.928966	1.39316	0.928966	0.758983	1.14815	0.809096	1.0666
6.08	6.78	32.7	16.67	12.26	Q92820	GGH	Gamma-glutamyl hydrolase	3	1.19124	0.469532	1.43219	0.831764	1.92309	1.13763	0.716681	1.49969	0.758578	1.78649	1.04713	0.390843	1.38038	0.758578	1.47231
5.24	5.46	59.82	11.79	9.643	P40197	GP5	Platelet glycoprotein V	3	0.855067	0.776245	2.10863	0.409261	1.80302	0.903649	0.850083	2.0893	0.432514	1.88799	0.946237	0.919731	2.0893	0.452898	1.97697
24.84	24.86	56.9	26.9	25.12	P80108	GPLD1	Phosphatidylinositol-glycan-specific phospholipase D	24	0.928966	0.803027	1.13763	0.824138	1.05682	1.1272	0.894375	1.14815	0.981748	1.36773	0.816582	0.841999	1.15878	0.704693	0.946237
9.33	9.33	45.13	27.43	19.47	P22352	GPX3	Glutathione peroxidase 3	9	1.05682	0.690495	1.1272	0.937562	1.19124	0.809096	0.34674	1.13763	0.685488	0.92045	1.2942	0.197535	1.14815	1.1272	1.57036
4.08	4.55	54.07	20.35	11.63	Q3ZCW2	GRP	Galectin-related protein	2	1	0.876429	8.3946	0.119124	8.3946	0.855067	0.642098	5.80764	0.147231	4.96592	1.15878	0.739632	2.0893	0.554626	2.42103
68.37	68.43	75.32	53.2	43.61	P06396	GSN	Gelsolin	73	0.151356	1.29155e-05	1.55597	0.11272	0.235505	1.09648	0.431264	1.08643	1.00925	1.19124	0.131826	5.57385e-07	1.65959	0.0981748	0.218776
3.44	3.47	65.56	13.69	7.469	P78417	GSTO1	Glutathione S-transferase omega-1	2	1.85353	0.353613	2.0893	0.887156	3.90841	0.501187	0.331425	2.0893	0.237684	1.04713	3.69828	0.184396	2.10863	1.75388	7.72681
2.03	2.46	33.38	4.678	2.149	O95479	H6PD	GDH/6PGL endoplasmic bifunctional protein	2	0.405508	0.412735	1.43219	0.16293	0.580764	0.549541	0.575542	1.35519	0.313329	0.744732	0.717794	0.688214	1.51356	0.405508	1.08643
20.31	22.79	51.96	35	28.39	Q14520	HABP2	Hyaluronan-binding protein 2	22	3.16228	0.0148395	1.65959	1.90546	6.85488	2.53513	0.0688132	1.59956	1.58489	4.83059	1.23595	0.310679	1.14815	1.07647	1.51356
34.23	34.23	88.03	88.03	84.51	P69905	HBA1	Hemoglobin subunit alpha	80	1.88799	0.12684	1.43219	1.31826	2.77971	1.6293	0.323198	1.38038	1.18032	2.18776	1.21339	0.540024	1.10662	1.09648	1.43219
30.76	30.76	90.48	89.8	70.07	P68871	HBB	Hemoglobin subunit beta	56	2.51189	0.191889	1.72187	1.45881	3.31131	3.37287	0.178667	1.83654	1.83654	5.44503	0.731139	0.904717	1.15878	0.570164	0.847227
6	23.76	71.43	68.03	61.22	P02042	HBD	Hemoglobin subunit delta	38	1.30617	0.389334	1.38038	0.946237	1.80302	1.19124	0.473123	1.31826	0.903649	1.57036	1.0666	0.850448	1.33045	0.801678	1.58489
14.42	14.66	39.08	20.31	16.03	Q04756	HGFAC	Hepatocyte growth factor activator	9	1.14815	0.586649	1.27057	0.903649	1.47231	1.78649	0.308811	1.49969	1.19124	4.05509	0.636796	0.679322	1.41906	0.337287	0.903649
140.27	140.92	93.84	91.38	87.19	P00738	HP	Haptoglobin	330	1.21339	7.01644e-06	1.00925	1.20226	1.22462	1.11686	0.00493975	1.00925	1.10662	1.1272	1.08643	0.000929874	1.00925	1.07647	1.09648
13.6	90.3	88.51	79.6	60.92	P00739	HPR	Haptoglobin-related protein	167	0.474242	0.786525	1.43219	0.277971	0.679204	0.380189	0.17685	1.36773	0.207014	0.519996	1.20226	0.139428	1.28233	0.937562	1.44544
177.2	177.37	83.98	78.14	69.26	P02790	HPX	Hemopexin	347	0.990832	0.802109	1	0.990832	0.990832	0.990832	0.840745	1	0.990832	0.990832	0.990832	0.505643	1	0.990832	0.990832
56.01	56.01	74.1	56.95	50.67	P04196	HRG	Histidine-rich glycoprotein	82	0.903649	0.17061	1.08643	0.794328	0.981748	1.39316	0.691328	1.23595	1.1272	1.5417	0.630957	0.0567818	1.11686	0.564937	0.704693
2.94	3	47.13	4.918	3.689	P07900	HSP90AA1	Heat shock protein HSP 90-alpha	4	0.801678	0.533496	20.5116	0.0465586	16.4437	0.895365	0.902395	9.72747	0.092045	8.70964	0.887156	0.483125	19.5884	0.049204	17.378
2.6	2.63	51.06	5.604	3.362	P14625	HSP90B1	Endoplasmin	3	0.862979	0.761798	1.40605	0.591562	1.21339	0.432514	0.0292997	1.44544	0.231207	0.625173	1.99526	0.0400072	1.45881	1.36773	3.49945
2.28	2.51	44.8	9.48	8.104	P11021	HSPA5	78 kDa glucose-regulated protein	4	0.824138	0.13574	5.64937	0.180302	4.65586	1.97697	0.695707	4.65586	0.42462	11.8032	0.310456	0.037622	5.24808	0.0642688	1.6293
9.25	9.27	45.05	15.33	13.31	P11142	HSPA8	Heat shock cognate 71 kDa protein	7	1.23595	0.874392	1.94089	0.636796	2.53513	0.325087	0.371428	2.60615	0.0420727	0.847227	3.80189	0.317108	3.04789	1.24738	22.2843
6.88	13.05	68.38	38.46	38.46	P01742	HV101	Ig heavy chain V-I region EU	21	0.0280543	0.26025	1.23595	0.0212814	0.0346737	0.144544	0.398666	1.21339	0.118032	0.175388	0.115878	0.52448	1.21339	0.0937562	0.140605
20.97	21.11	86.32	70.09	62.39	P01743	HV102	Ig heavy chain V-I region HG3	34	2.208	0.617676	2.51189	0.879022	7.04693	1.8197	0.620209	2.33346	0.77983	4.48745	1.21339	0.996289	2.26987	0.534564	2.96483
7.26	18.36	94.87	76.92	52.99	P23083	HV103	Ig heavy chain V-I region V35	35	0.390841	0.259356	1.49969	0.136773	0.586138	1.11686	0.684966	1.11686	1	1.2942	0.353183	0.214349	1.45881	0.11272	0.515229
2.66	2.83	69.84	29.37	19.05	P01814	HV201	Ig heavy chain V-II region OU	4	0.12942	0.262726	2.26987	0.0301995	0.293765	0.737904	0.727006	1.10662	0.648634	0.816582	0.170608	0.318851	2.208	0.0366438	0.376704
8.62	8.73	64.34	55.04	40.31	P01824	HV206	Ig heavy chain V-II region WAH	12	0.539511	0.379718	1.44544	0.343558	0.77983	0.625173	0.434098	1.31826	0.436516	0.824138	0.847227	0.849452	1.34276	0.60256	1.13763
14.63	14.76	64.96	55.56	47.86	P01825	HV207	Ig heavy chain V-II region NEWM	76	0.272898	0.304117	2.70396	0.180302	0.737904	0.505825	0.57824	1.87068	0.337287	0.946237	0.534564	0.55005	1.7378	0.349945	0.928966
6.35	12.53	50	42.47	22.6	P06331	HV209	Ig heavy chain V-II region ARH-77	69	0.170608	0.447198	2.44343	0.128233	0.416869	0.654636	0.683527	1.23595	0.539511	0.809096	0.229087	0.638117	2.35505	0.17378	0.539511
15.11	20.57	69.67	52.46	45.9	P01762	HV301	Ig heavy chain V-III region TRO	50	0.751623	0.944551	1.47231	0.474242	1.10662	1.02802	0.998359	1.75388	0.586138	1.55597	0.831764	0.932507	1.34276	0.613762	1.11686
8.63	20.64	93.86	69.3	58.77	P01763	HV302	Ig heavy chain V-III region WEA	55	0.366438	0.334826	1.8197	0.244343	0.666807	0.487529	0.292807	1.41906	0.255859	0.691831	0.855067	0.816814	1.31826	0.648634	1.1272
10.09	27.54	80.83	76.67	72.5	P01766	HV305	Ig heavy chain V-III region BRO	150	0.104713	0.195038	1.69044	0.0608135	0.177011	0.203236	0.790238	1.49969	0.120226	0.30479	0.483059	0.247622	1.21339	0.387258	0.586138
22.9	27.46	83.48	66.09	59.13	P01767	HV306	Ig heavy chain V-III region BUT	49	0.316228	0.341278	1.27057	0.20893	0.401791	0.222843	0.410638	1.41906	0.139316	0.316228	1.18032	0.783351	1.34276	0.879022	1.43219
22.3	28.7	99.16	63.87	56.3	P01770	HV309	Ig heavy chain V-III region NIE	76	2.208	0.701873	1.35519	1.6293	3.37287	2.29087	0.459009	1.31826	1.7378	3.83707	0.937562	0.641182	1.19124	0.758578	1.11686
6.14	16.33	71.43	44.44	27.78	P01772	HV311	Ig heavy chain V-III region KOL	70	0.912011	0.657201	1.20226	0.751623	1.09648	0.787046	0.934404	1.22462	0.619441	0.963829	1.14815	0.707924	1.21339	0.946237	1.45881
9.56	11.75	78.99	56.3	52.1	P01773	HV312	Ig heavy chain V-III region BUR	24	0.597035	0.626291	1.24738	0.37325	0.744732	0.83946	0.84496	1.2942	0.591562	1.08643	0.711214	0.748605	1.34276	0.42462	0.954993
3.76	26.51	66.67	62.39	54.7	P01776	HV315	Ig heavy chain V-III region WAS	104	1.02802	0.94593	1.13763	0.903649	1.1695	1.07647	0.883084	1.18032	0.912011	1.27057	0.954993	0.936167	1.21339	0.787046	1.15878
6.04	14.5	73.28	55.17	38.79	P01778	HV317	Ig heavy chain V-III region ZAP	30	0.380189	0.247138	2.10863	0.18197	0.801678	0.405508	0.263244	2.10863	0.194089	0.855067	0.928966	0.895078	2.0893	0.444631	1.94089
4.83	14.93	93.91	60.87	56.52	P01780	HV319	Ig heavy chain V-III region JON	22	0.319154	0.33985	1.47231	0.248886	0.469894	0.772681	0.892596	1.20226	0.642688	0.928966	0.380189	0.370166	1.6293	0.291072	0.619441
18.22	22.5	98.28	71.55	62.93	P01781	HV320	Ig heavy chain V-III region GAL	55	0.190546	0.399969	2.1677	0.121339	0.413047	0.654636	0.277906	1.23595	0.452898	0.809096	0.246604	0.521039	2.14783	0.167494	0.529663
36.23	36.3	54.88	36.69	36.03	P35858	IGFALS	Insulin-like growth factor-binding protein complex acid labile subunit	27	0.862979	0.534211	1.1272	0.744732	0.972747	0.787046	0.341762	1.13763	0.666807	0.895365	1.09648	0.73495	1.11686	0.981748	1.22462
8.86	9	72.51	27.49	20.62	P17936	IGFBP3	Insulin-like growth factor-binding protein 3	7	4.52898	0.888241	1.95885	2.31206	5.64937	5.70164	0.430087	2.208	2.58226	7.17794	0.83946	0.356548	1.20226	0.698232	1.00925
3.2	3.31	57.36	15.12	11.24	P22692	IGFBP4	Insulin-like growth factor-binding protein 4	2	1.11686	0.815663	2.0893	0.534564	2.33346	0.597035	0.420744	2.10863	0.285759	1.25892	1.83654	0.358495	2.0893	0.879022	3.87258
5.82	5.98	58.82	18.75	16.91	P24593	IGFBP5	Insulin-like growth factor-binding protein 5	4	1.02802	0.84939	1.92309	0.534564	2.10863	0.597035	0.762263	2.07014	0.265461	1.23595	1.67494	0.904759	2.0893	0.801678	6.72977
133.73	134.33	97.17	92.92	85.55	P01876	IGHA1	Ig alpha-1 chain C region	491	0.963829	0.450996	1.01859	0.954993	0.981748	1.10662	0.240718	1.00925	1.09648	1.11686	0.870964	0.10183	1.00925	0.862979	0.879022
16.97	102.58	90.29	74.41	70	P01877	IGHA2	Ig alpha-2 chain C region	335	4.87529	0.365379	1.92309	2.53513	6.0256	14.1906	0.150355	2.03236	6.98232	22.08	0.253513	0.233064	1.41906	0.170608	0.359749
25.32	25.34	72.92	54.43	52.86	P01880	IGHD	Ig delta chain C region	23	0.879022	0.248186	1.15878	0.758578	1.01859	0.258226	0.000483191	1.58489	0.105682	0.409261	3.40408	0.000405212	1.55597	2.18776	9.12011
336.61	337	99.7	94.85	90.61	P01857	IGHG1	Ig gamma-1 chain C region	745	0.887156	0.439231	1.00925	0.879022	0.895365	0.954993	0.832511	1.00925	0.946237	0.963829	0.92045	0.160321	1	0.92045	0.92045
89.93	237.12	92.94	89.88	87.42	P01859	IGHG2	Ig gamma-2 chain C region	638	0.847227	0.334223	1	0.847227	0.847227	0.895365	0.605124	1	0.895365	0.895365	0.937562	0.281304	1.00925	0.937562	0.946237
28	233.41	90.19	83.29	80.64	P01860	IGHG3	Ig gamma-3 chain C region	491	8.79023	0.153261	2.18776	4.01791	12.3595	9.2045	0.200706	2.22844	4.13048	14.0605	1.02802	0.746994	1.23595	0.831764	1.18032
49.68	233.06	92.97	86.24	84.4	P01861	IGHG4	Ig gamma-4 chain C region	607	2.07014	0.0761659	1.27057	1.6293	2.58226	3.56451	0.150486	1.47231	2.42103	4.83059	0.613762	0.954338	1.15878	0.505825	0.711214
76.45	76.5	80.31	62.39	61.95	P01871	IGHM	Ig mu chain C region	124	0.912011	0.19741	1.00925	0.903649	0.92045	0.912011	0.180624	1.00925	0.903649	0.92045	1	0.996845	1.00925	0.990832	1.00925
14.1	14.1	33.33	25.16	25.16	P01591	IGJ	Immunoglobulin J chain	19	2.93765	0.825912	1.69044	1.7378	6.91831	4.13048	0.371035	1.88799	2.18776	12.4738	0.698232	0.29077	1.19124	0.524808	0.831764
87.4	87.68	100	100	90.57	P01834	IGKC	Ig kappa chain C region	323	0.972747	0.492669	1	0.972747	0.972747	1.02802	0.858066	1	1.02802	1.02802	0.946237	0.357358	1	0.946237	0.946237
23.28	35.27	75.21	66.67	52.14	P01602	IGKV1-5	Ig kappa chain V-I region HK102 (Fragment)	89	0.175388	0.316817	2.03236	0.047863	0.356451	0.390841	0.738241	1.35519	0.260615	0.529663	0.440555	0.393852	1.65959	0.125893	0.731139
58.53	58.53	96.23	96.23	96.23	P0CG05	IGLC2	Ig lambda-2 chain C regions	195	0.122462	0.34826	1.64437	0.0981748	0.201372	0.387258	0.462412	1.34276	0.30761	0.519996	0.237684	0.444308	1.45881	0.21677	0.346737
2.84	30.73	96.23	88.68	83.96	A0M8Q6	IGLC7	Ig lambda-7 chain C region	127	0.0359749	0.334665	1.83654	0.0244343	0.0660693	1.0666	0.510275	1.25892	0.847227	1.34276	0.0369828	0.226433	1.7378	0.0270396	0.0642688
2.77	9.3	64.79	27.23	20.66	P15814	IGLL1	Immunoglobulin lambda-like polypeptide 1	20	0.824138	0.460501	1.36773	0.398107	1.1272	1.19124	0.835988	1.34276	0.887156	1.67494	0.679204	0.54455	1.36773	0.380189	0.928966
9.5	56.08	78.97	59.35	55.14	B9A064	IGLL5	Immunoglobulin lambda-like polypeptide 5	178	0.831764	0.126238	1.01859	0.816582	0.847227	0.879022	0.241618	1.01859	0.862979	0.895365	0.937562	0.465115	1.00925	0.928966	0.946237
3.05	3.36	52.63	9.825	4.912	Q9NPH3	IL1RAP	Interleukin-1 receptor accessory protein	2	16.1436	0.00311577	3.46737	4.65586	44.4631	23.3346	0.00240599	2.83139	8.24138	60.8135	0.224906	0.13157	3.01995	0.0765597	0.679204
2.09	2.35	43.58	8.85	7.301	Q13418	ILK	Integrin-linked protein kinase	3	0.529663	0.350989	3.43558	0.151356	1.8197	0.267917	0.225742	2.83139	0.0737904	0.758578	1.95885	0.477073	2.35505	0.831764	5.70164
2.02	2.07	35.23	3.693	2.557	P55103	INHBC	Inhibin beta C chain	1	0.608135	0.428738	2.0893	0.291072	1.27057	1.14815	0.76489	2.0893	0.549541	2.39883	0.519996	0.348527	2.0893	0.248886	1.08643
2.02	2.31	42.54	1.831	1.831	Q9NVR2	INTS10	Integrator complex subunit 10	2	0.201372	0.539456	2.77971	0.0744732	0.559758	0.824138	0.921562	1.35519	0.580764	1.11686	0.233346	0.586562	2.67917	0.0963829	0.625173
9.44	9.45	41.29	13.38	11.45	P08514	ITGA2B	Integrin alpha-IIb	9	0.704693	0.541211	2.0893	0.334195	1.47231	0.613762	0.437507	2.0893	0.293765	1.28233	1.1272	0.791223	2.0893	0.539511	2.37684
87.5	87.62	68.28	47.75	41.6	P19827	ITIH1	Inter-alpha-trypsin inhibitor heavy chain H1	143	2.05116	0.022877	1.38038	1.48594	2.44343	1.22462	0.578057	1.14815	1.0666	1.34276	1.58489	0.0038732	1.19124	1.33045	1.97697
81.79	81.81	64.59	42.07	39.64	P19823	ITIH2	Inter-alpha-trypsin inhibitor heavy chain H2	115	0.711214	0.159382	1.10662	0.666807	0.787046	0.452898	0.00658662	1.30617	0.394457	0.591562	1.58489	0.148841	1.20226	1.31826	1.83654
41.24	42.01	58.09	34.72	28.99	Q06033	ITIH3	Inter-alpha-trypsin inhibitor heavy chain H3	42	4.01791	3.2304e-06	1.75388	2.29087	6.25173	1.27057	0.502552	1.20226	1.05682	1.45881	3.19154	3.27996e-06	1.55597	2.05116	4.57088
91.38	91.75	77.96	59.14	53.98	Q14624	ITIH4	Inter-alpha-trypsin inhibitor heavy chain H4	143	1.01859	0.16916	1.00925	1.00925	1.02802	0.963829	0.00428981	1.00925	0.954993	0.972747	1.04713	1.3238e-05	1.00925	1.03753	1.05682
2.02	2.04	38.66	1.969	0.7159	Q14667	KIAA0100	UPF0378 protein KIAA0100	2	0.432514	0.363009	1.95885	0.115878	0.847227	0.855067	0.863003	1.58489	0.390841	1.35519	0.49204	0.326165	1.85353	0.149969	0.912011
66.13	69.37	89.66	60.66	53.45	P03952	KLKB1	Plasma kallikrein	56	3.66438	0.382332	1.65959	2.208	4.48745	4.52898	0.0478615	1.7378	2.60615	5.54626	0.787046	0.0802658	1.08643	0.724436	0.855067
73.08	73.11	78.26	47.2	43.94	P01042	KNG1	Kininogen-1	114	2.0893	0.0601437	1.09648	1.90546	2.22844	2.0893	0.0253726	1.10662	1.88799	2.22844	1.05682	0.711055	1.0666	0.990832	1.1272
32.85	32.94	63.35	37.89	34.16	P04264	KRT1	Keratin, type II cytoskeletal 1	26	3.01995	0.0620319	1.38038	2.18776	4.13048	3.80189	0.0274306	1.5417	2.46604	5.64937	0.77983	0.973838	1.20226	0.619441	0.937562
19.95	20.16	52.23	28.94	22.95	P13645	KRT10	Keratin, type I cytoskeletal 10	12	2.01372	0.198093	1.43219	1.40605	3.49945	2.93765	0.00542064	1.58489	1.85353	6.25173	0.666807	0.033923	1.25892	0.49204	0.83946
20.32	24.46	69.8	34.12	32.08	P35908	KRT2	Keratin, type II cytoskeletal 2 epidermal	16	0.912011	0.816547	1.43219	0.636796	1.30617	1.2942	0.811448	1.57036	0.824138	2.22844	0.717794	0.645913	1.48594	0.387258	1.0666
6.19	10.6	48.64	12.88	8.644	P13647	KRT5	Keratin, type II cytoskeletal 5	5	1.6293	0.341693	1.77011	0.92045	3.04789	2.14783	0.0678257	1.87068	1.14815	4.61318	0.751623	0.138006	1.38038	0.428549	1.03753
14.95	16.04	53.45	33.07	30.02	P35527	KRT9	Keratin, type I cytoskeletal 9	12	1.83654	0.105587	1.40605	1.30617	5.05825	1.19124	0.791663	1.35519	0.879022	2.26987	1.59956	0.157871	1.40605	1.13763	2.85759
2.78	30.73	71.3	58.33	50.93	P01594	KV102	Ig kappa chain V-I region AU	74	0.816582	0.868577	1.44544	0.544503	1.18032	0.879022	0.893609	1.40605	0.619441	1.23595	0.972747	0.974084	1.43219	0.648634	1.39316
6.48	27.81	80.37	77.57	61.68	P01596	KV104	Ig kappa chain V-I region CAR	58	0.143219	0.284066	4.32514	0.0586138	0.619441	0.672977	0.847607	1.36773	0.416869	0.92045	0.197697	0.122069	3.83707	0.0794328	0.758578
6.01	27.95	86.11	73.15	69.44	P01597	KV105	Ig kappa chain V-I region DEE	52	0.801678	0.720055	1.36773	0.586138	1.09648	0.937562	0.911695	1.24738	0.751623	1.1695	0.83946	0.796589	1.40605	0.597035	1.18032
10.22	29.18	71.3	64.81	34.26	P01599	KV107	Ig kappa chain V-I region Gal	63	1.14815	0.6563	20.1372	0.0570164	20.3236	1.87068	0.349954	2.208	0.847227	4.16869	0.613762	0.489715	20.7014	0.042462	12.7057
37.08	37.78	76.07	76.07	56.41	P01601	KV109	Ig kappa chain V-I region HK101 (Fragment)	102	0.666807	0.645253	1.41906	0.440555	0.946237	0.77983	0.720114	1.25892	0.586138	0.981748	0.847227	0.903497	1.36773	0.591562	1.15878
5.88	14.4	65.74	58.33	49.07	P01603	KV111	Ig kappa chain V-I region Ka	32	0.145881	0.909023	1.72187	0.0895365	0.251189	0.613762	0.364612	1.21339	0.496592	0.744732	0.199526	0.409609	1.72187	0.127057	0.343558
2.38	7.94	100	61.11	49.07	P01605	KV113	Ig kappa chain V-I region Lay	31	0.613762	0.854057	1.44544	0.353183	0.887156	0.353183	0.64067	1.78649	0.136773	0.630957	1.7378	0.757874	1.51356	1.14815	2.88403
11.74	19.72	71.3	71.3	56.48	P01606	KV114	Ig kappa chain V-I region OU	43	0.343558	0.360239	3.16228	0.104713	1.08643	0.505825	0.360786	1.69044	0.263027	0.855067	0.625173	0.9981	3.10456	0.183654	1.94089
5.69	26.72	100	77.78	67.59	P01607	KV115	Ig kappa chain V-I region Rei	66	0.77983	0.645977	2.0893	0.369828	1.6293	1.15878	0.752537	2.0893	0.554626	2.42103	0.660694	0.490259	2.0893	0.316228	1.38038
2.31	25.11	66.67	52.78	42.59	P01608	KV116	Ig kappa chain V-I region Roy	57	0.672977	0.30816	1.41906	0.420727	0.954993	0.801678	0.668142	1.43219	0.554626	1.14815	0.824138	0.410965	1.39316	0.515229	1.14815
9.45	25.91	93.52	70.37	64.81	P01609	KV117	Ig kappa chain V-I region Scw	73	1.02802	0.758718	1.27057	0.809096	1.35519	1.15878	0.643959	1.21339	0.954993	1.6293	0.870964	0.467183	1.25892	0.660694	1.09648
10.07	38.3	86.11	81.48	78.7	P01610	KV118	Ig kappa chain V-I region WEA	93	0.772681	0.660098	2.55859	0.301995	1.97697	0.77983	0.639571	1.41906	0.549541	1.10662	0.981748	0.971769	1.97697	0.496592	1.94089
13.68	18.41	70.37	58.33	47.22	P01611	KV119	Ig kappa chain V-I region Wes	27	3.7325	0.407307	2.39883	1.55597	7.58578	1.70608	0.683149	2.05116	0.831764	3.90841	2.1677	0.570312	1.75388	1.23595	3.98107
14.53	28.87	100	60.55	50.46	P01612	KV120	Ig kappa chain V-I region Mev	37	1.59956	0.421283	1.24738	1.28233	2.0893	1.58489	0.540576	1.27057	1.24738	2.12814	1	0.755663	1.49969	0.666807	1.49969
12.14	24.27	53.7	43.52	35.19	P04430	KV122	Ig kappa chain V-I region BAN	42	0.636796	0.293944	1.40605	0.353183	0.895365	0.487529	0.67102	1.67494	0.255859	0.816582	1.28233	0.4558	1.55597	0.824138	2.01372
7	32.59	70.54	66.67	60.47	P04431	KV123	Ig kappa chain V-I region Walker	76	0.224906	0.492687	2.91072	0.0387258	0.654636	0.654636	0.741359	1.59956	0.260615	1.04713	0.337287	0.659228	2.65461	0.111686	0.895365
4.54	15	66.07	66.07	52.68	P01616	KV203	Ig kappa chain V-II region MIL	40	1.07647	0.244514	2.60615	0.413047	2.80543	1.45881	0.209544	1.24738	1.1695	1.80302	0.731139	0.0370423	2.46604	0.299226	1.80302
14.89	26.61	89.47	69.92	56.39	P06310	KV206	Ig kappa chain V-II region RPMI 6410	63	0.765597	0.454021	1.55597	0.483059	1.19124	0.313329	0.0931923	1.61436	0.143219	0.505825	2.70396	0.16804	1.61436	1.67494	5.15229
15.93	24.46	100	70.37	58.33	P01619	KV301	Ig kappa chain V-III region B6	56	0.591562	0.35998	1.38038	0.440555	0.816582	0.648634	0.743755	1.30617	0.452898	0.847227	0.912011	0.455628	1.21339	0.751623	1.10662
2.8	47.02	100	78.9	74.31	P01620	KV302	Ig kappa chain V-III region SIE	158	1.07647	0.870268	2.0893	0.515229	2.24905	1.43219	0.516268	2.0893	0.685488	3.01995	0.737904	0.59299	2.10863	0.353183	1.55597
4.6	44.53	82	82	82	P01621	KV303	Ig kappa chain V-III region NG9 (Fragment)	137	24.8886	0.104248	4.44631	5.59758	72.4436	18.0302	0.129837	4.44631	4.05509	60.256	1.80302	0.437878	1.77011	1.01859	3.16228
7.69	43.81	85.32	85.32	80.73	P01622	KV304	Ig kappa chain V-III region Ti	139	1.23595	0.335348	1.72187	0.717794	2.18776	1.05682	0.369063	1.80302	0.586138	2.31206	1.24738	0.879109	1.77011	0.704693	2.39883
6.14	17.58	100	63.3	51.38	P01624	KV306	Ig kappa chain V-III region POM	32	0.654636	0.436919	4.32514	0.151356	2.83139	1.10662	0.805054	7.24436	0.152757	8.01678	0.586138	0.36722	2.0893	0.280543	1.22462
24.48	27.72	88.37	81.4	77.52	P04207	KV308	Ig kappa chain V-III region CLL	57	2.48886	0.255822	2.0893	1.19124	5.19996	2.22844	0.28625	2.0893	1.0666	4.69894	1.10662	0.825578	2.0893	0.529663	2.31206
12	28.78	66.96	63.48	63.48	P04433	KV309	Ig kappa chain V-III region VG (Fragment)	65	0.170608	0.554962	2.18776	0.114815	0.37325	0.519996	0.704086	1.44544	0.328095	0.751623	0.30761	0.791799	1.67494	0.248886	0.515229
3.27	9.47	63.79	63.79	44.83	P04434	KV310	Ig kappa chain V-III region VH (Fragment)	16	1.0666	0.864742	1.44544	0.737904	1.5417	1.23595	0.667839	1.38038	0.895365	1.70608	0.847227	0.780475	1.59956	0.529663	1.35519
9.58	15.21	73.44	59.38	51.56	P06311	KV311	Ig kappa chain V-III region IARC/BL41	41	0.704693	0.913055	1.47231	0.487529	1.03753	1.25892	0.727735	1.33045	0.946237	1.7378	0.544503	0.803774	1.58489	0.343558	0.862979
4.01	15.68	83.33	83.33	72.81	P01625	KV402	Ig kappa chain V-IV region Len	25	1.00925	0.996758	1.28233	0.787046	1.2942	0.801678	0.69663	1.35519	0.586138	1.08643	1.24738	0.694075	1.31826	0.946237	1.65959
4.38	9.99	87.16	75.23	60.55	P83593	KV405	Ig kappa chain V-IV region STH (Fragment)	22	1.2942	0.687281	1.40605	0.92045	1.97697	1.65959	0.678051	1.40605	1.18032	2.70396	0.751623	0.443794	1.35519	0.549541	1.01859
17.19	17.67	62.99	36.59	26.4	P18428	LBP	Lipopolysaccharide-binding protein	17	3.16228	0.00142227	1.47231	2.14783	5.97035	1.15878	0.65805	1.23595	0.937562	1.44544	2.80543	0.00315366	1.38038	2.03236	5.24808
12.11	12.12	47.27	22.27	18.64	P04180	LCAT	Phosphatidylcholine-sterol acyltransferase	8	1.52757	0.381682	1.40605	1.08643	2.55859	1.43219	0.263266	1.36773	1.04713	2.07014	1.07647	0.820931	1.23595	0.870964	1.41906
2.96	3.15	55.98	10.05	2.871	P13796	LCP1	Plastin-2	2	1.13763	0.397314	1.90546	0.597035	2.22844	0.787046	0.0205209	1.99526	0.359749	1.57036	1.45881	0.0154907	1.41906	1.02802	2.0893
6.22	6.32	56.63	15.06	10.54	P00338	LDHA	L-lactate dehydrogenase A chain	4	0.903649	0.872356	2.29087	0.394457	2.07014	0.794328	0.61574	1.77011	0.444631	1.40605	1.1272	0.711903	2.12814	0.529663	2.39883
3.83	6.28	48.2	23.95	14.07	P07195	LDHB	L-lactate dehydrogenase B chain	5	1.55597	0.273653	1.44544	1.07647	2.67917	0.448745	0.298095	1.87068	0.167494	0.83946	3.31131	0.0808999	1.94089	1.70608	11.272
18.43	18.49	56.75	26.67	23.59	Q08380	LGALS3BP	Galectin-3-binding protein	21	2.39883	0.00119895	1.34276	1.78649	3.53183	1.64437	0.0680548	1.24738	1.31826	2.24905	1.44544	0.0472588	1.18032	1.22462	1.7378
3.18	4.05	58.15	16.62	5.538	P48059	LIMS1	LIM and senescent cell antigen-like-containing domain protein 1	2	0.698232	0.315955	2.12814	0.299226	1.48594	0.134276	0.0437464	4.87529	0.0124738	0.654636	4.44631	0.0809954	3.59749	1.23595	19.2309
33.65	52.82	53.08	41.75	40.13	P08519	LPA	Apolipoprotein(a)	58	10	2.28433e-08	2.22844	4.48745	21.4783	4.13048	0.008142	1.97697	2.0893	5.97035	2.67917	2.98237e-06	1.31826	2.03236	4.74242
25.01	25.02	63.69	45.82	37.75	P02750	LRG1	Leucine-rich alpha-2-glycoprotein	32	2.91072	0.00137769	1.36773	2.12814	3.94457	0.461318	0.0538729	1.44544	0.328095	0.666807	5.7544	1.44951e-05	1.78649	3.22107	10
19.39	19.49	60.95	25.74	24.26	P51884	LUM	Lumican	15	0.195884	0.0506311	2.83139	0.109648	0.554626	0.642688	0.307754	1.27057	0.483059	0.816582	0.283139	0.249347	2.48886	0.180302	0.704693
2.24	2.31	35.9	31.62	7.692	P04211	LV001	Ig lambda chain V region 4A	2	0.267917	0.691611	2.05116	0.17378	0.549541	0.47863	0.760683	1.48594	0.337287	0.711214	0.534564	0.916731	1.45881	0.376704	0.77983
6.17	8.52	75.68	51.35	38.74	P01699	LV101	Ig lambda chain V-I region VOR	27	0.436516	0.420622	2.03236	0.233346	0.887156	0.591562	0.378496	1.5417	0.288403	0.912011	0.765597	0.91779	1.58489	0.47863	1.21339
12.68	14.9	74.11	70.54	56.25	P01700	LV102	Ig lambda chain V-I region HA	34	0.428549	0.637654	1.78649	0.139316	0.765597	1.11686	0.992858	1.15878	0.963829	1.33045	0.380189	0.632612	1.8197	0.122462	0.691831
7.68	15.34	85.44	71.84	65.05	P01703	LV105	Ig lambda chain V-I region NEWM	39	0.469894	0.565894	1.88799	0.161436	0.887156	1.72187	0.698731	1.45881	1.18032	3.0761	0.285759	0.411853	2.03236	0.0847227	0.580764
27.37	27.39	99.23	71.54	67.69	P06316	LV107	Ig lambda chain V-I region BL2	34	0.413047	0.118507	1.83654	0.229087	0.758578	1.52757	0.804763	1.51356	1.00925	2.42103	0.263027	0.0999076	2.29087	0.1	0.60256
7.55	13.18	85.32	72.48	67.89	P06888	LV109	Ig lambda chain V-I region EPS	11	0.0972747	0.181081	2.55859	0.0648634	0.248886	0.698232	0.940693	1.33045	0.524808	0.928966	0.104713	0.185886	2.93765	0.0619441	0.30761
7.76	11.17	85.59	74.77	65.77	P01707	LV204	Ig lambda chain V-II region TRO	12	0.57544	0.744564	1.55597	0.248886	0.895365	0.363078	0.624119	1.94089	0.151356	0.704693	1.69044	0.846483	1.67494	1.00925	2.70396
15	15.32	66.06	61.47	49.54	P01708	LV205	Ig lambda chain V-II region BUR	14	0.887156	0.5077	1.27057	0.704693	1.1272	0.990832	0.563138	1.24738	0.816582	1.23595	0.879022	0.920325	1.27057	0.648634	1.11686
4.99	9.09	61.26	56.76	51.35	P01709	LV206	Ig lambda chain V-II region MGC	7	0.37325	0.473815	1.64437	0.17378	0.613762	0.724436	0.850617	1.39316	0.444631	1.00925	0.505825	0.552694	1.61436	0.299226	0.816582
2.03	7.95	61.26	44.14	30.63	P01710	LV207	Ig lambda chain V-II region BO	6	0.870964	0.784188	3.80189	0.229087	3.31131	0.83946	0.481876	1.80302	0.465586	1.51356	1.02802	0.608638	3.31131	0.310456	3.40408
7.03	14.03	50	49.11	44.64	P04209	LV211	Ig lambda chain V-II region NIG-84	13	0.214783	0.318897	2.58226	0.133045	0.554626	0.544503	0.411997	1.44544	0.310456	0.787046	0.369828	0.800798	2.05116	0.275423	0.758578
14.04	16.13	63.89	42.59	42.59	P01714	LV301	Ig lambda chain V-III region SH	20	0.334195	0.16323	1.95885	0.122462	0.654636	1.01859	0.614563	1.18032	0.862979	1.22462	0.325087	0.256895	1.97697	0.111686	0.642688
22.15	24.58	90.09	73.87	72.97	P80748	LV302	Ig lambda chain V-III region LOI	57	0.413047	0.411045	1.64437	0.0691831	0.679204	0.672977	0.604485	1.30617	0.331131	0.879022	0.597035	0.650604	1.47231	0.155597	0.879022
8.12	8.34	55.14	41.12	32.71	P01717	LV403	Ig lambda chain V-IV region Hil	33	0.487529	0.30592	1.45881	0.18197	0.711214	0.47863	0.266809	1.44544	0.170608	0.691831	1.04713	0.886685	1.18032	0.887156	1.24738
6	12.14	84.26	67.59	67.59	P01719	LV501	Ig lambda chain V-V region DEL	26	0.325087	0.141762	2.24905	0.0855067	0.731139	0.879022	0.812714	1.35519	0.608135	1.19124	0.353183	0.171148	2.18776	0.0801678	0.772681
4.01	21.11	67.86	65.18	50	P01721	LV601	Ig lambda chain V-VI region AR	15	0.349945	0.522617	1.88799	0.0679204	0.660694	0.586138	0.761397	1.61436	0.328095	0.946237	0.564937	0.685793	1.61436	0.214783	0.912011
6.83	19.14	68.47	61.26	45.95	P06317	LV603	Ig lambda chain V-VI region SUT	13	0.570164	0.270903	1.88799	0.108643	1.07647	1.39316	0.663871	1.8197	0.765597	2.88403	0.42462	0.181977	2.0893	0.0580764	0.887156
5.12	5.23	65.54	25.68	20.95	P61626	LYZ	Lysozyme C	4	1.23595	0.545255	1.49969	0.824138	2.05116	1.05682	0.991414	1.47231	0.717794	1.61436	1.15878	0.43852	1.40605	0.824138	1.69044
2.17	2.19	32.46	6.545	3.665	Q13477	MADCAM1	Mucosal addressin cell adhesion molecule 1	1	1.25892	0.64775	2.0893	0.60256	2.63027	1.95885	0.331198	2.0893	0.937562	4.13048	0.636796	0.461788	2.0893	0.30479	1.33045
3.72	5.85	49.16	11.49	7.044	P33908	MAN1A1	Mannosyl-oligosaccharide 1,2-alpha-mannosidase IA	5	0.981748	0.990735	2.0893	0.469894	2.05116	0.895365	0.796651	4.83059	0.185353	4.32514	1.08643	0.805039	5.64937	0.192309	6.13762
15.69	17.08	43.49	19.03	16.88	P48740	MASP1	Mannan-binding lectin serine protease 1	13	2.31206	0.346413	1.21339	1.90546	2.75423	2.03236	0.355472	1.22462	1.65959	2.42103	1.35519	0.902187	1.22462	1.10662	1.61436
4.44	6.55	38.48	14.58	9.038	O00187	MASP2	Mannan-binding lectin serine protease 2	7	1.27057	0.539088	1.95885	0.648634	2.46604	1.18032	0.726482	1.87068	0.630957	2.22844	1.07647	0.743633	1.99526	0.539511	2.07014
6.14	6.24	48.79	25	19.76	P11226	MBL2	Mannose-binding protein C	4	1.39316	0.428713	1.31826	1.05682	1.94089	0.972747	0.988688	1.27057	0.765597	1.23595	1.41906	0.379325	1.2942	1.09648	1.94089
2.33	2.33	33.08	2.308	2.308	A1L020	MEX3A	RNA-binding protein MEX3A	2	1	0.982902	2.0893	0.47863	2.0893	1.1695	0.742357	2.0893	0.559758	2.44343	0.847227	0.756947	2.0893	0.405508	1.77011
2.03	2.04	50.11	3.146	3.146	P26572	MGAT1	Alpha-1,3-mannosyl-glycoprotein 2-beta-N-acetylglucosaminyltransferase	1	0.83946	0.765431	1.38038	0.608135	1.15878	1.15878	0.732098	1.38038	0.83946	1.59956	0.717794	0.557598	1.38038	0.519996	0.990832
2.07	2.08	49.76	5.293	1.547	Q13201	MMRN1	Multimerin-1	2	0.570164	0.980417	4.57088	0.111686	2.60615	0.570164	0.718086	4.48745	0.123595	2.55859	0.937562	0.734267	4.52898	0.180302	4.2462
18.12	18.23	58.51	26.86	22.5	P26927	MST1	Hepatocyte growth factor-like protein	13	2.80543	0.0544387	1.70608	1.64437	6.36796	2.63027	0.00585592	1.75388	1.49969	5.01187	1.11686	0.830812	1.22462	0.912011	1.45881
12.34	12.92	60.26	10.71	7.602	P35579	MYH9	Myosin-9	17	0.648634	0.0131664	1.25892	0.413047	0.816582	0.288403	0.0201398	1.7378	0.135519	0.501187	2.37684	0.126777	1.70608	1.39316	3.87258
2.03	2.11	41.52	8.187	5.848	P19105	MYL12A	Myosin regulatory light chain 12A	1	1.03753	0.140422	2.70396	0.383707	2.83139	0.870964	0.406304	2.72898	0.319154	2.37684	1.18032	0.00641253	2.10863	0.559758	2.53513
2.04	2.07	43.05	7.285	7.285	P60660	MYL6	Myosin light polypeptide 6	1	0.359749	0.235348	2.10863	0.172187	0.758578	0.519996	0.347187	2.0893	0.248886	1.08643	0.685488	0.522227	2.10863	0.328095	1.44544
5.77	5.81	43.61	9.69	5.384	P54802	NAGLU	Alpha-N-acetylglucosaminidase	3	1.22462	0.684614	2.0893	0.586138	2.55859	3.04789	0.213926	2.10863	1.44544	6.36796	0.398107	0.25882	2.10863	0.190546	0.83946
4.01	4.03	44.31	4.55	3.575	O14786	NRP1	Neuropilin-1	2	1.41906	0.52998	2.10863	0.672977	2.96483	1.57036	0.446454	2.0893	0.751623	3.31131	0.887156	0.829652	2.0893	0.42462	1.85353
38.87	39.05	85.07	74.13	73.63	P02763	ORM1	Alpha-1-acid glycoprotein 1	75	1.33045	0.476767	1.01859	1.30617	1.35519	0.879022	0.0950107	1.01859	0.862979	0.895365	1.49969	0.0375744	1.01859	1.47231	1.52757
13.7	29.18	78.11	66.17	66.17	P19652	ORM2	Alpha-1-acid glycoprotein 2	43	1.47231	0.646872	1.24738	1.18032	1.8197	0.387258	0.152812	1.47231	0.316228	0.570164	3.66438	0.108118	1.69044	2.1677	4.83059
3.17	3.25	32.42	4.396	4.396	Q9HBI1	PARVB	Beta-parvin	3	0.824138	0.3453	4.44631	0.185353	3.66438	0.698232	0.300775	3.40408	0.205116	2.37684	1.1695	0.815918	2.18776	0.534564	2.55859
9.48	11.55	60.4	23.56	20	Q9UHG3	PCYOX1	Prenylcysteine oxidase 1	9	0.487529	0.314439	1.75388	0.197697	0.855067	0.704693	0.985314	1.67494	0.383707	1.18032	0.691831	0.0659409	1.45881	0.401791	1.00925
5.81	5.82	54.85	8.317	6.733	P30101	PDIA3	Protein disulfide-isomerase A3	3	0.77983	0.706043	4.44631	0.175388	3.46737	0.816582	0.69673	4.44631	0.183654	3.63078	0.946237	0.988297	1.99526	0.474242	1.88799
4.03	4.06	39.32	7.273	7.273	Q15084	PDIA6	Protein disulfide-isomerase A6	2	0.337287	0.274176	4.48745	0.0758578	1.51356	0.0275423	0.0605506	4.57088	0.0102802	0.125893	9.0365	0.0762827	4.44631	2.03236	37.6704
2.02	4.06	48.38	2.338	2.338	O15530	PDPK1	3-phosphoinositide-dependent protein kinase 1	2	1.90546	0.344449	2.10863	0.903649	3.98107	1.59956	0.435677	2.0893	0.765597	3.37287	1.18032	0.736859	2.0893	0.564937	2.46604
2.02	4.06	48.38	2.338	2.338	O15530	PDPK1	3-phosphoinositide-dependent protein kinase 1	2	1.90546	0.344449	2.10863	0.903649	3.98107	1.59956	0.435677	2.0893	0.765597	3.37287	1.18032	0.736859	2.0893	0.564937	2.46604
2.03	2.05	42.39	2.434	2.028	P12955	PEPD	Xaa-Pro dipeptidase	1	0.937562	0.917307	2.0893	0.448745	1.95885	1.38038	0.555734	2.10863	0.654636	2.88403	0.679204	0.50994	2.0893	0.322107	1.41906
7.28	9.35	72.28	43.56	35.64	P02776	PF4	Platelet factor 4	7	6.42688	0.184708	2.05116	3.13329	28.5759	6.25173	0.503084	2.0893	2.99226	27.0396	1.02802	0.443843	1.13763	0.903649	1.1695
2.09	2.11	42.05	5.897	2.179	P17858	PFKL	6-phosphofructokinase, liver type	1	0.457088	0.430393	4.7863	0.0855067	2.18776	0.49204	0.438275	3.59749	0.108643	1.77011	0.870964	0.980181	4.32514	0.155597	3.76704
10.43	10.71	59.29	59.29	53.57	P07737	PFN1	Profilin-1	9	0.672977	0.201571	1.13763	0.559758	0.765597	0.270396	0.013581	1.58489	0.114815	0.428549	2.46604	0.0733977	1.47231	1.67494	5.49541
6.03	6.46	78.66	18.23	11.75	P00558	PGK1	Phosphoglycerate kinase 1	4	1.03753	0.928217	2.0893	0.496592	2.1677	0.334195	0.220419	2.10863	0.159956	0.704693	3.0761	0.212407	2.10863	1.45881	6.42688
31.67	31.71	66.49	43.06	39.41	Q96PD5	PGLYRP2	N-acetylmuramoyl-L-alanine amidase	40	0.972747	0.352717	1.41906	0.717794	1.38038	2.99226	0.216119	1.57036	1.90546	4.74242	0.288403	0.00747525	1.28233	0.244343	0.369828
3.94	3.95	27	6.479	5.184	Q6UXB8	PI16	Peptidase inhibitor 16	2	0.879022	0.889636	1.39316	0.597035	1.22462	0.831764	0.999782	1.43219	0.49204	1.19124	1.05682	0.889848	1.43219	0.737904	1.59956
10.27	10.72	63.61	18.06	9.948	P01833	PIGR	Polymeric immunoglobulin receptor	8	0.972747	0.734837	1.41906	0.704693	1.38038	0.990832	0.782443	1.35519	0.724436	1.34276	0.963829	0.94949	1.38038	0.691831	1.33045
9.99	10.53	55.37	13.94	10.17	P14618	PKM2	Pyruvate kinase isozymes M1/M2	5	1.10662	0.456755	1.41906	0.77983	1.57036	0.483059	0.0555534	1.61436	0.113763	0.77983	2.24905	0.0464063	1.6293	1.38038	10.1859
3.96	4.08	48.75	19.95	8.39	Q13093	PLA2G7	Platelet-activating factor acetylhydrolase	3	1.13763	0.735873	1.52757	0.744732	1.7378	1.38038	0.651276	1.45881	0.946237	2.33346	0.824138	0.893053	1.5417	0.457088	1.27057
2.4	2.42	39.71	13.43	3.714	P08567	PLEK	Pleckstrin	1	4.01791	0.0948643	2.33346	1.72187	10.5682	1.40605	0.44533	1.90546	0.737904	2.88403	3.01995	0.174519	1.97697	1.52757	8.16582
134.31	134.42	78.64	69.63	66.54	P00747	PLG	Plasminogen	196	1.10662	1.42003e-10	1.00925	1.09648	1.11686	1.09648	2.33215e-09	1.00925	1.08643	1.10662	1	0.530552	1.00925	0.990832	1.00925
8.92	9.01	54.56	19.47	16.23	P55058	PLTP	Phospholipid transfer protein	10	0.937562	0.92177	1.41906	0.672977	1.33045	0.737904	0.433648	1.40605	0.515229	1.03753	1.24738	0.505054	1.40605	0.887156	1.87068
2.18	2.19	50.09	6.805	3.403	Q6UX71	PLXDC2	Plexin domain-containing protein 2	1	0.801678	0.759509	1.90546	0.420727	1.52757	0.831764	0.819813	2.35505	0.353183	1.95885	0.954993	0.932786	1.55597	0.613762	1.48594
29.93	30.03	70.7	46.48	38.87	P27169	PON1	Serum paraoxonase/arylesterase 1	22	1.59956	0.557445	1.43219	1.11686	1.90546	0.92045	0.0726108	1.18032	0.758578	1.08643	1.65959	0.18831	1.33045	1.24738	2.29087
4.45	4.53	47.13	10.41	7.656	Q15063	POSTN	Periostin	5	1.65959	0.413565	2.10863	0.787046	3.46737	1.20226	0.702762	2.0893	0.57544	2.51189	1.35519	0.565669	2.0893	0.648634	2.85759
4.83	4.92	73.44	35.94	26.56	P02775	PPBP	Platelet basic protein	4	0.586138	0.550746	1.43219	0.369828	0.83946	0.49204	0.717473	1.45881	0.251189	0.717794	1.20226	0.137735	1.31826	0.912011	1.7378
2.14	2.14	51.52	16.36	8.485	P62937	PPIA	Peptidyl-prolyl cis-trans isomerase A	1	1.19124	0.653594	1.57036	0.758578	1.94089	0.758578	0.435275	1.52757	0.457088	1.15878	1.52757	0.193822	1.5417	0.990832	2.85759
2.04	4.11	65.33	10.55	10.55	Q06830	PRDX1	Peroxiredoxin-1	2	5.59758	0.141647	2.10863	2.65461	11.8032	7.44732	0.122339	2.10863	3.53183	15.7036	0.744732	0.602931	2.10863	0.356451	1.57036
6.18	6.22	61.11	23.74	19.7	P32119	PRDX2	Peroxiredoxin-2	3	1.47231	0.8207	1.48594	0.990832	5.01187	1.51356	0.817919	1.44544	1.04713	5.64937	0.937562	0.996983	1.31826	0.597035	1.23595
10.75	10.81	50.14	10.54	8.618	Q92954	PRG4	Proteoglycan 4	13	1.20226	0.303598	1.19124	1.00925	1.43219	0.946237	0.949914	1.21339	0.809096	1.14815	1.27057	0.219608	1.18032	1.07647	1.49969
8.48	10.55	41.65	17.35	13.45	P04070	PROC	Vitamin K-dependent protein C	10	1	0.939315	1.30617	0.765597	1.27057	0.92045	0.768169	1.28233	0.711214	1.18032	1.08643	0.676052	1.25892	0.862979	1.38038
38.56	38.61	60.06	35.21	32.25	P07225	PROS1	Vitamin K-dependent protein S	38	3.83707	0.000681426	1.80302	2.12814	5.86138	2.99226	0.00369873	1.69044	1.77011	4.28548	1.2942	0.0813351	1.13763	1.13763	1.51356
16.51	18.62	52	28	28	P22891	PROZ	Vitamin K-dependent protein Z	12	0.895365	0.652273	1.30617	0.679204	1.1695	0.758578	0.339514	1.35519	0.554626	1.02802	1.1695	0.527654	1.34276	0.870964	1.58489
4.02	4.08	56.68	16.19	6.883	P07477	PRSS1	Trypsin-1	2	0.772681	0.637357	1.41906	0.544503	1.09648	0.855067	0.759505	1.38038	0.619441	1.18032	0.895365	0.847864	1.38038	0.648634	1.23595
2.11	2.12	55.79	12.11	8.421	P41222	PTGDS	Prostaglandin-H2 D-isomerase	3	1.10662	0.818765	1.92309	0.57544	2.12814	0.77983	0.763676	1.94089	0.401791	1.51356	1.38038	0.619001	1.44544	0.954993	2.26987
33.73	99.1	54.86	38.93	34.21	P20742	PZP	Pregnancy zone protein	144	1.19124	0.633888	1.19124	1	1.39316	0.698232	0.101843	1.14815	0.580764	0.801678	1.67494	0.033585	1.22462	1.36773	2.35505
13.57	13.62	66.27	16.2	13.39	O00391	QSOX1	Sulfhydryl oxidase 1	8	0.862979	0.597772	1.34276	0.57544	1.15878	0.963829	0.972885	1.36773	0.698232	1.31826	0.831764	0.439328	1.34276	0.564937	1.11686
4.19	4.19	32.57	20.64	12.84	Q15907	RAB11B	Ras-related protein Rab-11B	2	0.855067	0.650009	7.87046	0.108643	6.72977	0.954993	0.897767	4.65586	0.205116	4.44631	0.887156	0.73038	19.5884	0.049204	17.378
7.42	7.51	40.76	35.33	25.54	P61224	RAP1B	Ras-related protein Rap-1b	5	0.717794	0.943949	2.70396	0.263027	1.94089	0.483059	0.506084	2.67917	0.177011	1.2942	1.47231	0.478676	2.63027	0.559758	3.90841
4.05	4.05	50.92	14.11	14.11	Q99969	RARRES2	Retinoic acid receptor responder protein 2	3	4.87529	0.443578	2.99226	1.6293	22.6987	5.59758	0.372299	2.96483	1.88799	27.0396	0.824138	0.805504	1.57036	0.510505	1.2942
19.18	19.21	69.65	47.26	41.29	P02753	RBP4	Retinol-binding protein 4	34	0.322107	0.482564	1.48594	0.20893	0.47863	0.809096	0.500781	1.1272	0.698232	0.912011	0.37325	0.0300134	1.47231	0.242103	0.549541
2.05	2.12	38.24	2.941	1.765	P40937	RFC5	Replication factor C subunit 5	1	0.83946	0.7424	2.0893	0.401791	1.75388	1.14815	0.765378	2.0893	0.549541	2.39883	0.717794	0.564874	2.0893	0.343558	1.49969
2.03	2.07	36.59	1.754	1.754	Q9HB90	RRAGC	Ras-related GTP-binding protein C	1	1.75388	0.297464	1.30617	1.34276	3.40408	0.772681	0.762238	1.43219	0.343558	1.10662	2.14783	0.357372	1.48594	1.44544	6.54636
2.2	2.33	54.51	7.22	2.888	Q15404	RSU1	Ras suppressor protein 1	1	0.903649	0.954064	1.67494	0.515229	1.51356	0.870964	0.696517	1.7378	0.469894	1.51356	1.02802	0.737068	1.83654	0.559758	1.92309
3.1	3.22	71.93	35.09	31.58	P06702	S100A9	Protein S100-A9	2	0.77983	0.253362	2.72898	0.283139	2.12814	0.353183	0.0745859	2.48886	0.12942	0.879022	2.22844	0.10315	4.48745	0.496592	10
11.58	11.61	94.26	77.87	59.02	P02735	SAA1	Serum amyloid A protein	10	22.9087	0.0111162	1.39316	16.4437	47.863	0.0501187	0.325416	1.87068	0.0376704	0.0937562	59.1562	0.000186194	1.22462	48.3059	70.4693
7.75	7.83	90.77	60	50.77	P35542	SAA4	Serum amyloid A-4 protein	23	1.39316	0.771517	1.19124	1.1695	1.87068	0.288403	0.182927	2.14783	0.108643	0.619441	4.61318	0.13365	2.31206	1.99526	13.3045
2.04	2.15	40.89	2.883	1.311	Q01826	SATB1	DNA-binding protein SATB1	1	1.13763	0.823805	1.20226	0.946237	1.36773	1.0666	0.908555	1.25892	0.847227	1.34276	1.05682	0.911812	1.1695	0.903649	1.23595
2.05	2.09	36	3.294	3.294	O95810	SDPR	Serum deprivation-response protein	1	1.01859	0.961106	2.0893	0.487529	2.12814	0.277971	0.18965	2.0893	0.131826	0.580764	3.63078	0.186351	2.0893	1.7378	7.58578
4.02	4.08	40.05	8.333	6.989	P14151	SELL	L-selectin	2	5.70164	0.380269	4.87529	1.1695	20.1372	9.54993	0.10762	6.08135	1.57036	43.6516	0.586138	0.235018	1.83654	0.288403	1.07647
8.33	8.34	40.94	18.64	11.81	P49908	SEPP1	Selenoprotein P	6	2.31206	0.935942	1.6293	1.41906	5.10505	4.65586	0.0963299	2.03236	2.29087	11.4815	0.49204	0.104558	1.40605	0.359749	0.691831
164.28	164.31	88.76	83.73	81.58	P01009	SERPINA1	Alpha-1-antitrypsin	346	1.04713	0.0686807	1	1.04713	1.04713	0.937562	0.000262005	1.00925	0.937562	0.946237	1.10662	1.22939e-07	1	1.10662	1.10662
11.5	11.91	45.95	24.32	16.67	Q9UK55	SERPINA10	Protein Z-dependent protease inhibitor	8	1.48594	0.54754	1.24738	1.19124	1.87068	1.05682	0.982919	1.27057	0.831764	1.33045	1.35519	0.469265	1.27057	1.0666	1.72187
53.5	57.28	78.25	68.56	61.47	P01011	SERPINA3	Alpha-1-antichymotrypsin	80	3.63078	1.99816e-06	1.24738	2.91072	4.13048	0.461318	0.06076	1.31826	0.369828	0.608135	7.44732	0.000239944	1.59956	4.65586	9.54993
30.8	30.86	66.04	46.14	40.98	P29622	SERPINA4	Kallistatin	27	0.49204	0.00160434	1.35519	0.380189	0.666807	1.23595	0.922115	1.13763	1.08643	1.35519	0.383707	0.00200058	1.5417	0.283139	0.591562
14.58	15.03	71.67	27.09	17.98	P05154	SERPINA5	Plasma serine protease inhibitor	9	1.88799	0.151946	1.5417	1.22462	3.22107	1.88799	0.0650753	1.49969	1.25892	3.69828	0.981748	0.428845	1.25892	0.765597	1.23595
20.63	27.82	60.74	42.47	35.8	P08185	SERPINA6	Corticosteroid-binding globulin	31	0.60256	0.177187	1.25892	0.448745	0.758578	0.501187	0.175265	1.38038	0.353183	0.691831	1.1695	0.993891	1.14815	1.01859	1.31826
17.37	19.45	51.08	36.39	27.23	P05543	SERPINA7	Thyroxine-binding globulin	19	0.831764	0.147775	1.13763	0.685488	0.946237	0.954993	0.806179	1.13763	0.83946	1.08643	0.855067	0.310854	1.14815	0.724436	0.981748
2.02	2.09	44.33	3.43	3.43	P30740	SERPINB1	Leukocyte elastase inhibitor	1	0.801678	0.747311	1.52757	0.505825	1.22462	0.376704	0.391538	1.49969	0.133045	0.564937	2.10863	0.501146	1.47231	1.43219	5.54626
59.15	61.41	78.88	56.68	52.16	P01008	SERPINC1	Antithrombin-III	79	0.685488	0.00972409	1.0666	0.636796	0.731139	0.801678	0.0464238	1.0666	0.737904	0.855067	0.824138	0.19703	1.05682	0.77983	0.870964
46.93	47.21	71.34	47.9	38.68	P05546	SERPIND1	Heparin cofactor 2	45	0.895365	0.150111	1.07647	0.794328	0.963829	0.847227	0.365529	1.08643	0.711214	0.92045	1.05682	0.400876	1.07647	0.981748	1.14815
17.42	17.45	62.44	39.23	26.08	P36955	SERPINF1	Pigment epithelium-derived factor	20	1.43219	0.0887085	1.21339	1.18032	1.70608	0.787046	0.979761	1.1695	0.666807	0.92045	1.72187	0.0922121	1.22462	1.40605	2.14783
41.35	41.42	68.64	52.14	47.45	P08697	SERPINF2	Alpha-2-antiplasmin	34	2.53513	0.0278519	1.44544	1.75388	4.20727	1.83654	0.418373	1.33045	1.38038	2.83139	1.38038	0.209471	1.13763	1.21339	1.58489
61.03	61.25	68.2	51.2	45.2	P05155	SERPING1	Plasma protease C1 inhibitor	96	2.22844	0.0368048	1.2942	1.72187	2.58226	0.737904	0.0805118	1.1695	0.666807	0.862979	3.0761	0.00047728	1.5417	1.99526	3.83707
2.03	2.1	45.69	2.871	1.914	P50454	SERPINH1	Serpin H1	1	1.44544	0.510186	2.0893	0.691831	3.01995	1.34276	0.579593	2.0893	0.642688	2.80543	1.0666	0.879362	2.0893	0.510505	2.22844
11.27	12.43	62.69	34.58	29.85	P04278	SHBG	Sex hormone-binding globulin	10	0.698232	0.162898	1.2942	0.529663	0.903649	1.18032	0.740413	1.33045	0.887156	1.70608	0.586138	0.077282	1.40605	0.394457	0.824138
4.02	4.02	32.01	7.591	7.591	P09486	SPARC	SPARC	2	0.879022	0.77492	1.94089	0.452898	1.70608	0.963829	0.922722	1.8197	0.529663	1.75388	0.903649	0.845796	1.64437	0.549541	1.48594
2.48	2.48	54.98	14.69	5.687	Q13103	SPP2	Secreted phosphoprotein 24	1	1.33045	0.261584	1.31826	1.00925	1.85353	1.19124	0.245431	1.39316	0.855067	1.72187	1.10662	0.945224	1.51356	0.731139	1.70608
6.11	6.11	86.93	18.09	14.07	P37802	TAGLN2	Transgelin-2	5	5.15229	0.328122	1.61436	3.19154	11.4815	2.44343	0.968593	1.41906	1.72187	4.32514	2.05116	0.335923	1.41906	1.44544	2.96483
273.57	273.82	92.55	87.25	84.81	P02787	TF	Serotransferrin	652	1.00925	0.0564733	1	1.00925	1.00925	1.04713	9.95153e-05	1	1.04713	1.04713	0.954993	0.00370316	1	0.954993	0.954993
6.67	6.86	58.42	11.84	8.816	P02786	TFRC	Transferrin receptor protein 1	5	0.353183	0.231936	2.05116	0.0483059	0.724436	0.625173	0.326315	2.31206	0.220801	1.44544	0.534564	0.553259	2.51189	0.109648	1.34276
14.16	14.37	62.96	15.81	13.03	Q15582	TGFBI	Transforming growth factor-beta-induced protein ig-h3	8	0.37325	0.0955108	1.31826	0.275423	0.49204	0.660694	0.181261	1.22462	0.510505	0.809096	0.524808	0.148561	1.28233	0.394457	0.672977
25.29	25.31	48.97	23.33	17.35	P07996	THBS1	Thrombospondin-1	17	1.11686	0.799135	1.19124	0.937562	1.40605	0.564937	0.141821	1.28233	0.359749	0.724436	1.97697	0.0821461	1.39316	1.41906	4.16869
68.17	68.18	65.6	31.29	27.27	Q9Y490	TLN1	Talin-1	66	0.597035	0.0155544	1.19124	0.515229	0.711214	0.220801	1.587e-06	1.6293	0.144544	0.359749	2.80543	0.000100867	1.47231	1.90546	3.76704
8	8.02	50.48	16.4	16.4	Q16473	TNXA	Putative tenascin-XA	4	1.31826	0.184606	1.87068	0.704693	2.46604	1.1695	0.352374	1.69044	0.691831	1.97697	1.11686	0.512354	1.55597	0.717794	1.7378
6.03	6.12	64.66	20.48	16.47	P60174	TPI1	Triosephosphate isomerase	3	0.731139	0.540527	21.0863	0.0440555	15.417	0.751623	0.58271	21.0863	0.0448745	15.8489	0.954993	0.929456	2.0893	0.457088	1.99526
2.53	2.66	75	15.49	2.817	P09493	TPM1	Tropomyosin alpha-1 chain	1	1.0666	0.00797172	2.67917	0.398107	2.88403	1.35519	0.00227852	2.26987	0.597035	3.28095	0.77983	0.00228743	2.01372	0.366438	1.57036
68.16	68.17	78.91	64.63	64.63	P02766	TTR	Transthyretin	105	0.100925	5.64651e-06	1.64437	0.0586138	0.165959	0.148594	1.18186e-06	1.69044	0.0912011	0.251189	0.539511	0.0952932	1.10662	0.496592	0.597035
8.06	8.11	50.78	17.74	12.42	P68363	TUBA1B	Tubulin alpha-1B chain	4	1.1272	0.871543	1.52757	0.737904	1.78649	0.972747	0.996523	1.34276	0.717794	1.30617	1.14815	0.874884	1.49969	0.765597	1.78649
5.38	5.48	35.96	12.13	10.11	Q9BVA1	TUBB2B	Tubulin beta-2B chain	4	0.895365	0.838475	2.0893	0.428549	1.87068	0.744732	0.594513	2.0893	0.353183	1.55597	1.19124	0.71485	2.0893	0.570164	2.51189
5.27	5.48	27.79	6.241	5.498	Q6EMK4	VASN	Vasorin	3	1.11686	0.837549	1.25892	0.887156	1.40605	1.05682	0.859268	1.23595	0.855067	1.30617	1.04713	0.977009	1.11686	0.937562	1.1695
2.76	2.93	44.79	7.442	4.06	P19320	VCAM1	Vascular cell adhesion protein 1	2	0.679204	0.514261	2.10863	0.325087	1.43219	0.758578	0.621659	2.0893	0.363078	1.58489	0.887156	0.825977	2.0893	0.42462	1.85353
25.52	25.55	62.08	20.9	18.87	P18206	VCL	Vinculin	21	0.672977	0.0157853	1.15878	0.564937	0.77983	0.143219	3.89937e-07	2.18776	0.0564937	0.313329	4.87529	3.47043e-05	2.14783	2.26987	13.4277
3.82	5.9	65.04	48.78	48.78	A6NJ16	VSIG6	Putative V-set and immunoglobulin domain-containing protein 6	16	0.383707	0.136465	1.65959	0.0928966	0.636796	0.887156	0.51747	1.19124	0.758578	1.05682	0.436516	0.24218	1.59956	0.0972747	0.698232
41.22	41.51	62.34	46.44	42.26	P04004	VTN	Vitronectin	71	5.91562	0.000214538	1.41906	4.16869	7.44732	3.49945	0.0082714	1.28233	2.72898	3.90841	1.8197	0.0616484	1.1695	1.55597	2.12814
16.77	16.77	39.39	7.572	5.972	P04275	VWF	von Willebrand factor	13	1.21339	0.554433	1.24738	0.972747	1.52757	0.383707	0.648819	1.49969	0.205116	0.57544	3.40408	0.213341	1.77011	1.92309	6.0256
6.84	6.85	42.41	14.19	12.38	O75083	WDR1	WD repeat-containing protein 1	5	0.413047	0.219273	1.7378	0.135519	0.717794	0.205116	0.04296	2.33346	0.0288403	0.47863	1.92309	0.907603	1.75388	1.09648	4.32514
2.02	6.03	72.94	13.73	13.73	P62258	YWHAE	14-3-3 protein epsilon	4	1.69044	0.403209	2.10863	0.801678	3.53183	0.751623	0.606574	2.0893	0.356451	1.57036	2.22844	0.286164	2.0893	1.0666	4.69894
8.23	8.27	63.27	18.78	15.92	P63104	YWHAZ	14-3-3 protein zeta/delta	5	1.28233	0.703583	1.64437	0.77983	2.75423	0.524808	0.566024	1.80302	0.118032	0.946237	2.14783	0.0851427	1.5417	1.39316	20.5116
2.01	2.05	43.47	2.902	0.8833	O43432	EIF4G3	Eukaryotic translation initiation factor 4 gamma 3	2	0.685488	0.260165	1.59956	0.428549	1.09648	0.92045	0.625621	1.59956	0.57544	1.47231	0.744732	0.348167	1.31826	0.564937	0.981748
2	4	27.15	3.311	3.311	O75144	ICOSLG	ICOS ligand	2	0.519996	0.349013	2.10863	0.248886	1.09648	0.390841	0.253946	2.10863	0.187068	0.824138	1.31826	0.596503	2.0893	0.630957	2.77971
2	2.02	36.4	1.858	0.3096	O95477	ABCA1	ATP-binding cassette sub-family A member 1	1	0.299226	0.105825	2.26987	0.0972747	0.679204	0.226986	0.0506321	2.55859	0.0432514	0.580764	1.30617	0.284327	1.65959	0.787046	2.75423
2	2.02	21.11	8.889	8.889	P01344	IGF2	Insulin-like growth factor II	1	0.469894	0.30629	2.0893	0.222843	0.981748	0.288403	0.195218	2.0893	0.136773	0.60256	1.61436	0.431391	2.10863	0.765597	3.37287
2	20.57	97.48	57.14	50.42	P01775	HV314	Ig heavy chain V-III region LAY	59	0.359749	0.524688	1.83654	0.144544	0.660694	0.30479	0.562706	2.03236	0.111686	0.619441	1.10662	0.933296	1.44544	0.765597	1.58489
2.01	2.73	54.17	22.5	12.5	P01815	HV202	Ig heavy chain V-II region COR	2	0.855067	0.823695	1.22462	0.666807	1.04713	1	0.973424	1.19124	0.83946	1.19124	0.847227	0.799371	1.28233	0.642688	1.08643
2	16.02	85.07	70.15	61.19	P06314	KV404	Ig kappa chain V-IV region B17	27	0.660694	0.672301	1.44544	0.409261	0.954993	0.57544	0.561869	1.41906	0.340408	0.816582	1.13763	0.840016	1.5417	0.737904	1.8197
2	2.23	27.97	4.823	3.537	P07307	ASGR2	Asialoglycoprotein receptor 2	1	0.263027	0.182925	2.10863	0.125893	0.554626	0.724436	0.570562	2.0893	0.346737	1.51356	0.359749	0.235053	2.10863	0.172187	0.758578
2	2	52.43	10.68	10.68	P08493	MGP	Matrix Gla protein	1	1.51356	0.474111	2.0893	0.724436	3.16228	1.40605	0.534966	2.0893	0.672977	2.93765	1.0666	0.881046	2.0893	0.510505	2.22844
2	2.01	32.41	1.468	0.7866	P10586	PTPRF	Receptor-type tyrosine-protein phosphatase F	1	19.7697	0.0829633	2.12814	9.28966	42.0727	22.08	0.0799701	2.12814	10.3753	46.9894	0.887156	0.821022	2.0893	0.42462	1.85353
2	2.03	32.44	2.369	0.6423	P11717	IGF2R	Cation-independent mannose-6-phosphate receptor	2	1.92309	0.338604	2.0893	0.92045	4.05509	3.25087	0.202003	2.0893	1.55597	6.85488	0.586138	0.406862	2.0893	0.277971	1.22462
2	2.49	40.1	1.042	1.042	P27816	MAP4	REVERSED Microtubule-associated protein 4	2	0.515229	0.455195	1.41906	0.316228	0.731139	1.18032	0.942489	4.05509	0.291072	4.87529	0.432514	0.431481	3.16228	0.115878	1.36773
2.01	2.07	36.73	2.548	1.486	P48723	HSPA13	REVERSED Heat shock 70 kDa protein 13	2	0.346737	0.227551	2.10863	0.165959	0.731139	0.685488	0.52309	2.10863	0.328095	1.44544	0.501187	0.330882	2.0893	0.237684	1.04713
2	8.1	51.56	17.86	12.5	P68366	TUBA4A	Tubulin alpha-4A chain	4	0.270396	0.223947	2.33346	0.0903649	0.630957	0.109648	0.204132	2.37684	0.0337287	0.260615	3.28095	0.822328	2.22844	1.47231	7.24436
2	4	12.55	0.4441	0.2703	Q02817	MUC2	Mucin-2	2	3.87258	0.177756	2.0893	1.85353	8.16582	2.39883	0.264362	2.0893	1.14815	5.05825	1.59956	0.437179	2.10863	0.758578	3.34195
2.01	2.07	48	2.909	2.182	Q14247	CTTN	Src substrate cortactin	2	0.824138	0.724222	2.0893	0.394457	1.72187	1.15878	0.760434	2.0893	0.554626	2.42103	0.704693	0.548696	2.0893	0.337287	1.47231
2	2.49	50.67	2.852	1.456	Q15058	KIF14	Kinesin-like protein KIF14	4	3.90841	0.176952	2.10863	1.85353	8.16582	6.0256	0.135686	2.0893	2.88403	12.7057	0.642688	0.465123	2.0893	0.30479	1.34276
2	2.02	43.32	2.11	0.5862	Q5H9U9	DDX60L	Probable ATP-dependent RNA helicase DDX60-like	1	0.124738	0.0401904	2.29087	0.0751623	0.285759	0.855067	0.0442428	1.57036	0.505825	1.34276	0.125893	0.00769525	2.55859	0.0666807	0.322107
2.01	2.01	40.05	1.249	0.4684	Q6EMB2	TTLL5	REVERSED Tubulin polyglutamylase TTLL5	1	1.77011	0.518928	1.48594	1.19124	2.91072	1.0666	0.94884	1.39316	0.765597	1.52757	1.64437	0.547206	1.20226	1.36773	2.12814
2.01	2.02	32.47	3.07	1.023	Q7Z7G0	ABI3BP	Target of Nesh-SH3	1	1.44544	0.0445748	22.4905	0.0642688	23.7684	3.80189	0.0365923	30.761	0.123595	39.0841	0.296483	0.197471	27.7971	0.0224905	8.24138
2.01	2.08	26.87	6.167	4.405	Q96S96	PEBP4	Phosphatidylethanolamine-binding protein 4	1	0.337287	0.216951	1.49969	0.224906	0.505825	0.717794	0.517514	2.22844	0.319154	1.59956	0.47863	0.312132	1.97697	0.212814	0.946237
2.01	2.07	45.99	3.239	0.6478	Q9H2G2	SLK	REVERSED STE20-like serine/threonine-protein kinase	1	0.346737	0.22655	2.0893	0.164437	0.724436	0.285759	0.193685	2.0893	0.135519	0.597035	1.20226	0.707691	2.0893	0.57544	2.51189
2.01	2.12	44.26	2.107	1.264	Q9H8L6	MMRN2	Multimerin-2	1	0.981748	0.985247	2.0893	0.469894	2.05116	1.80302	0.367967	2.0893	0.862979	3.80189	0.539511	0.363609	2.0893	0.255859	1.1272
2.01	2.04	26.29	2.642	1.453	Q9HCU0	CD248	Endosialin	1	1	0.990771	2.0893	0.47863	2.0893	0.83946	0.751223	2.10863	0.401791	1.77011	1.1695	0.743374	2.0893	0.559758	2.44343
2	2.05	27.52	1.762	0.6711	Q9NQC3	RTN4	Reticulon-4	1	0.954993	0.998033	1.99526	0.49204	1.90546	0.642688	0.185823	1.49969	0.0564937	0.963829	1.44544	0.161058	1.55597	0.928966	23.1206
2	2.31	26.35	2.662	1.597	Q9UPN9	TRIM33	E3 ubiquitin-protein ligase TRIM33	3	0.679204	0.51017	2.0893	0.325087	1.41906	0.654636	0.481775	2.0893	0.313329	1.36773	1.02802	0.942601	2.0893	0.49204	2.14783
2	2.02	45.64	1.58	0.5266	Q9UPS8	ANKRD26	REVERSED Ankyrin repeat domain-containing protein 26	1	1.30617	0.9763	1.41906	0.92045	1.87068	0.57544	0.627763	1.5417	0.331131	0.887156	2.24905	0.644534	1.69044	1.33045	4.87529
0.48	0.58	41.25	1.742	0.7666	A2PYH4	HFM1	REVERSED Probable ATP-dependent DNA helicase HFM1	2	4.7863	0.154861	2.0893	2.29087	10.0925	4.92039	0.152933	2.10863	2.33346	10.2802	0.972747	0.966402	2.0893	0.465586	2.03236
0.12	0.13	33.14	1.419	0.5008	A2RUS2	DENND3	DENN domain-containing protein 3	1	1.35519	0.435435	2.0893	0.648634	2.85759	1.25892	0.531021	4.2462	0.296483	5.34564	1.07647	0.803074	3.34195	0.322107	3.59749
0.06	0.27	27.05	2.693	0	A4D1B5	PION	REVERSED Gamma-secretase-activating protein	0	1.52757	0.127667	1.49969	1.01859	2.70396	1.27057	0.204883	1.24738	1.01859	1.85353	1.19124	0.305643	1.49969	0.794328	1.85353
0.06	0.4	41.11	4.373	0	A6NFE2	C12orf70	Uncharacterized protein C12orf70	0	1.00925	0.992436	1.38038	0.731139	1.39316	1.1272	0.746412	1.38038	0.816582	1.55597	0.887156	0.752866	1.38038	0.642688	1.22462
0.12	0.17	50.65	1.623	0	A6NFT4	CCDC42B	REVERSED Coiled-coil domain-containing protein 42B	0	1.2942	0.272367	1.8197	0.711214	2.42103	1.15878	0.467504	4.13048	0.280543	4.83059	1.10662	0.603707	4.40555	0.251189	4.92039
0.11	0.2	73.99	5.83	0	A6NL28	TPM3L	REVERSED Putative tropomyosin alpha-3 chain-like protein	0	0.0554626	0.121689	2.70396	0.0212814	0.149969	0.190546	0.155022	2.35505	0.0751623	0.448745	0.12942	0.457712	3.01995	0.0496592	0.390841
0.08	0.5	28.79	2.91	0.7657	A6NMB9	FIGNL2	REVERSED Putative fidgetin-like protein 2	1	1.65959	0.41344	2.0893	0.794328	3.46737	2.58226	0.246373	2.0893	1.23595	5.44503	0.636796	0.459336	2.0893	0.301995	1.33045
0.05	0.06	47.73	27.27	0	A8MW06	TMSL3	Thymosin beta-4-like protein 3	0	1.07647	0.901029	1.24738	0.862979	1.36773	0.57544	0.511164	1.6293	0.258226	0.937562	1.8197	0.463367	1.51356	1.20226	4.16869
0.11	0.14	44.42	1.313	0	A8MXT2	MAGEB17	REVERSED Melanoma-associated antigen B17	0	25.8226	0.114826	4.52898	5.70164	85.5067	26.3027	0.113072	4.01791	6.54636	86.2979	0.946237	0.944791	1.38038	0.685488	1.30617
0.1	0.1	72.1	1.062	0.6757	A8MXY4	ZNF99	Zinc finger protein 99	1	0.398107	0.454357	2.10863	0.0937562	0.83946	0.642688	0.597118	2.24905	0.260615	1.44544	0.564937	0.746176	2.88403	0.165959	1.6293
0.53	0.53	20.17	10.08	5.882	O00175	CCL24	REVERSED C-C motif chemokine 24	1	0.331131	0.992038	2.1677	0.1	0.717794	0.724436	0.95358	1.49969	0.444631	1.08643	0.461318	0.945668	1.87068	0.139316	0.862979
0.3	0.35	32.87	2.376	1.584	O00401	WASL	Neural Wiskott-Aldrich syndrome protein	1	1.31826	0.789398	1.38038	0.954993	2.22844	1.25892	0.871411	1.33045	0.946237	2.12814	1.03753	0.91229	1.36773	0.758578	1.45881
0.06	0.2	54.69	1.618	0	O14562	UBFD1	REVERSED Ubiquitin domain-containing protein UBFD1	0	0.887156	0.569787	2.0893	0.42462	1.85353	0.92045	0.675659	2.55859	0.359749	2.35505	0.954993	0.848224	3.66438	0.260615	3.49945
0.05	0.15	32.47	1.845	0	O14595	CTDSP2	Carboxy-terminal domain RNA polymerase II polypeptide A small phosphatase 2	0	1.2942	0.621004	2.0893	0.619441	2.70396	0.928966	0.899727	2.0893	0.444631	1.94089	1.38038	0.55667	2.10863	0.654636	2.88403
0.12	1.03	20	4.706	1.471	O14681	EI24	Etoposide-induced protein 2.4 homolog	1	1.38038	0.631534	6.08135	0.226986	8.3946	1.90546	0.371671	2.10863	0.903649	3.98107	0.717794	0.547737	5.54626	0.12942	3.98107
0.06	0.15	49.63	4.467	0	O14965	AURKA	Serine/threonine-protein kinase 6	0	0.60256	0.44087	2.0893	0.288403	1.25892	0.879022	0.789968	2.0893	0.416869	1.83654	0.685488	0.546731	3.59749	0.188799	2.46604
0.12	0.18	39.87	2.428	0.9337	O14980	XPO1	Exportin-1	1	3.49945	0.194092	27.5423	0.127057	36.3078	2.72898	0.238214	27.7971	0.0981748	32.8095	1.27057	0.641576	20.893	0.0608135	21.4783
0.18	0.24	32.59	2.573	0	O15091	KIAA0391	Mitochondrial ribonuclease P protein 3	0	0.954993	0.989064	1.55597	0.613762	1.48594	1.08643	0.88609	1.24738	0.870964	1.35519	0.870964	0.896711	1.5417	0.564937	1.34276
0.11	0.19	42.2	5.108	0	O15143	ARPC1B	Actin-related protein 2/3 complex subunit 1B	0	1.0666	0.513479	1.64437	0.648634	1.75388	0.954993	0.57921	1.38038	0.691831	1.31826	1.10662	0.332675	1.83654	0.60256	2.03236
0.05	0.07	33.76	1.508	0	O15169	AXIN1	Axin-1	0	0.937562	0.799946	7.51623	0.124738	7.04693	0.744732	0.675807	3.59749	0.207014	2.67917	1.24738	0.854056	19.9526	0.0625173	20.5116
0.06	0.09	21.54	2.439	0	O15393	TMPRSS2	REVERSED Transmembrane protease serine 2	0	0.801678	0.683171	2.0893	0.383707	1.67494	0.564937	0.385275	2.0893	0.267917	1.18032	1.40605	0.532683	2.0893	0.672977	2.96483
0.06	0.06	40.46	3.179	0	O43542	XRCC3	DNA repair protein XRCC3	0	0.972747	0.96487	4.69894	0.207014	4.57088	1.22462	0.625539	6.48634	0.188799	7.94328	0.787046	0.601816	2.0893	0.376704	1.64437
0.06	0.06	40.46	3.179	0	O43542	XRCC3	DNA repair protein XRCC3	0	0.972747	0.96487	4.69894	0.207014	4.57088	1.22462	0.625539	6.48634	0.188799	7.94328	0.787046	0.601816	2.0893	0.376704	1.64437
0.06	0.14	33.24	1.892	0	O60507	TPST1	Protein-tyrosine sulfotransferase 1	0	6.19441	0.15443	2.10863	2.93765	13.1826	3.34195	0.234613	2.10863	1.58489	7.11213	1.83654	0.384012	2.10863	0.870964	3.83707
0.5	0.63	54.27	6.826	2.73	O60812	HNRNPCL1	Heterogeneous nuclear ribonucleoprotein C-like 1	1	2.53513	0.684287	2.05116	1.23595	14.5881	6.79204	0.283438	2.93765	2.31206	33.1131	0.366438	0.363895	1.99526	0.194089	0.731139
0.05	0.11	58.6	4.032	0	O60909	B4GALT2	REVERSED Beta-1,4-galactosyltransferase 2	0	0.597035	0.41661	2.0893	0.283139	1.24738	0.301995	0.202331	2.0893	0.143219	0.630957	1.95885	0.332659	2.10863	0.928966	4.09261
0.05	0.17	36.72	2.79	1.116	O75113	N4BP1	NEDD4-binding protein 1	1	0.108643	0.180522	2.75423	0.0280543	0.299226	0.115878	0.179836	2.53513	0.0380189	0.293765	0.990832	0.991197	2.35505	0.21677	2.33346
0.05	0.1	42.18	3.073	0	O75503	CLN5	REVERSED Ceroid-lipofuscinosis neuronal protein 5	0	1.69044	0.401238	2.0893	0.809096	3.56451	1.13763	0.783955	2.0893	0.544503	2.37684	1.47231	0.494401	2.0893	0.704693	3.10456
0.05	2.2	54.4	6.918	1.572	O75618	DEDD	Death effector domain-containing protein	1	0.787046	0.62572	1.33045	0.57544	1.04713	0.981748	0.836305	1.36773	0.704693	1.34276	0.794328	0.755794	1.24738	0.636796	0.990832
0.14	0.29	33.89	3.356	0	O75628	REM1	REVERSED GTP-binding protein REM 1	0	0.928966	0.891223	2.0893	0.444631	1.94089	0.954993	0.938865	2.0893	0.457088	1.99526	0.963829	0.951569	2.0893	0.461318	2.01372
0.05	0.06	50.57	1.437	0	O75764	TCEA3	REVERSED Transcription elongation factor A protein 3	0	0.0110662	0.0296904	2.29087	0.01	0.0253513	0.0159956	0.0590863	2.24905	0.0100925	0.0359749	0.0954993	0.0186023	5.05825	0.01	0.483059
0.05	0.39	33.13	5.97	0	O76003	GLRX3	Glutaredoxin-3	0	0.190546	0.576388	3.34195	0.0138038	0.636796	0.772681	0.824369	1.23595	0.534564	0.954993	0.242103	0.703964	2.96483	0.0145881	0.717794
0.06	0.11	42.24	1.429	0	O76021	RSL1D1	Ribosomal L1 domain-containing protein 1	0	3.34195	0.331784	3.19154	1.04713	24.4343	4.44631	0.263707	4.69894	0.946237	28.3139	0.794328	0.68844	1.92309	0.405508	1.52757
0.24	0.33	29.85	2.923	1.044	O94991	SLITRK5	REVERSED SLIT and NTRK-like protein 5	1	4.69894	0.28583	1.28233	3.66438	8.24138	0.912011	0.44166	1.36773	0.731139	1.24738	5.10505	0.543042	1.27057	4.01791	7.04693
0.06	0.06	16.67	11.9	0	O95167	NDUFA3	NADH dehydrogenase [ubiquinone] 1 alpha subcomplex subunit 3	0	1.10662	0.828213	2.0893	0.529663	2.31206	1.22462	0.686666	2.0893	0.586138	2.55859	0.895365	0.838298	2.0893	0.428549	1.87068
0.06	0.06	63.64	1.515	0	O95218	ZRANB2	Zinc finger Ran-binding domain-containing protein 2	0	0.534564	0.35861	2.0893	0.255859	1.11686	0.642688	0.466155	2.0893	0.30761	1.34276	0.824138	0.719789	2.0893	0.394457	1.72187
0.61	0.67	41.16	5.054	2.527	O95229	ZWINT	REVERSED ZW10 interactor	1	0.580764	0.586642	1.23595	0.337287	0.717794	0.731139	0.673373	1.1695	0.539511	0.855067	0.787046	0.876961	1.18032	0.549541	0.928966
0.07	0.08	55.56	2.881	0	O95292	VAPB	REVERSED Vesicle-associated membrane protein-associated protein B/C	0	0.549541	0.386712	3.94457	0.139316	2.1677	0.642688	0.469205	2.10863	0.30761	1.35519	0.847227	0.793157	4.05509	0.20893	3.43558
0.06	0.07	54.08	2.817	0	O95299	NDUFA10	REVERSED NADH dehydrogenase [ubiquinone] 1 alpha subcomplex subunit 10, mitochondrial	0	18.0302	0.249205	2.70396	6.66807	50.5825	8.70964	0.201738	2.39883	3.63078	46.1318	2.0893	0.643663	1.92309	1.08643	4.05509
0.07	0.11	34.34	2.436	0	O95985	TOP3B	REVERSED DNA topoisomerase 3-beta-1	0	1.39316	0.539136	2.10863	0.660694	2.91072	1.69044	0.401918	2.0893	0.809096	3.53183	0.816582	0.713207	2.0893	0.387258	1.70608
0.1	0.48	37.34	4.721	0	O95999	BCL10	REVERSED B-cell lymphoma/leukemia 10	0	0.0251189	0.211404	3.04789	0.0155597	0.0765597	0.165959	0.266205	1.75388	0.0870964	0.291072	0.0440555	0.633312	5.19996	0.0214783	0.229087
0.95	0.98	29.07	2.133	2.133	P00326	ADH1C	Alcohol dehydrogenase 1C	1	14.5881	0.132783	2.55859	5.70164	48.3059	11.9124	0.148223	2.26987	5.24808	46.1318	1.20226	0.700984	1.67494	0.717794	2.01372
0.07	0.13	41.5	1.976	0	P00746	CFD	REVERSED Complement factor D	0	0.672977	0.519847	2.0893	0.322107	1.40605	1.51356	0.469131	2.0893	0.724436	3.16228	0.440555	0.289967	2.10863	0.210863	0.928966
0.14	0.2	38.08	3.846	0	P00918	CA2	Carbonic anhydrase 2	0	1.2942	0.622728	2.0893	0.619441	2.70396	1.31826	0.600776	2.0893	0.630957	2.75423	0.972747	0.967351	2.0893	0.465586	2.03236
0.07	0.13	45.69	3.589	0	P01009	SERPINA1	REVERSED Alpha-1-antitrypsin	0	0.376704	0.411801	1.64437	0.124738	0.619441	0.625173	0.545923	1.51356	0.37325	0.946237	0.586138	0.726139	1.55597	0.242103	0.912011
1.36	1.51	35.75	13.53	9.179	P01033	TIMP1	Metalloproteinase inhibitor 1	1	1.14815	0.615928	2.0893	0.549541	2.39883	1.33045	0.427831	6.08135	0.218776	8.09096	0.855067	0.671165	11.695	0.0731139	10
0.13	12.21	81.48	57.41	52.78	P01604	KV112	Ig kappa chain V-I region Kue	17	1.10662	0.719578	1.33045	0.831764	1.51356	0.444631	0.68838	1.59956	0.133045	0.711214	2.48886	0.498695	1.72187	1.44544	7.7983
0.47	5.42	39.64	20.72	16.22	P01711	LV208	Ig lambda chain V-II region VIL	4	0.691831	0.524272	2.0893	0.328095	1.44544	0.409261	0.264107	2.0893	0.194089	0.855067	1.67494	0.407222	2.0893	0.801678	3.53183
0.1	4.34	79.28	35.14	23.42	P01712	LV209	Ig lambda chain V-II region WIN	4	0.855067	0.768155	1.24738	0.685488	1.0666	0.928966	0.853398	1.34276	0.691831	1.24738	0.912011	0.907242	1.25892	0.724436	1.14815
0.77	0.8	50.4	16.8	6.4	P01817	HV204	Ig heavy chain V-II region MCE	1	1.0666	0.985937	5.19996	0.205116	5.54626	0.711214	0.453097	4.57088	0.155597	3.25087	1.48594	0.459163	2.0893	0.711214	3.10456
0.05	0.1	46.84	1.657	0	P02545	LMNA	Prelamin-A/C	0	0.60256	0.426554	2.10863	0.288403	1.27057	0.855067	0.771777	2.0893	0.409261	1.78649	0.698232	0.537913	2.10863	0.334195	1.47231
0.25	0.44	73.52	6.721	0	P02675	FGB	REVERSED Fibrinogen beta chain	0	1.36773	0.56247	2.0893	0.654636	2.85759	1.11686	0.810738	2.0893	0.534564	2.33346	1.21339	0.697548	2.0893	0.580764	2.53513
0.58	0.73	53.53	3.448	1.97	P02768	ALB	REVERSED Serum albumin	1	0.258226	0.468296	2.58226	0.136773	0.666807	0.704693	0.523115	1.59956	0.413047	1.1272	0.334195	0.290796	2.48886	0.17378	0.831764
1.96	4.25	53.53	5.911	2.627	P02771	AFP	Alpha-fetoprotein	4	0.787046	0.66388	2.72898	0.288403	2.14783	0.862979	0.886562	2.03236	0.42462	1.75388	0.895365	0.764138	1.70608	0.524808	1.52757
1.94	11.34	61.83	12.96	9.296	P02788	LTF	Lactotransferrin	17	0.717794	0.559275	2.0893	0.340408	1.49969	0.524808	0.34959	2.0893	0.248886	1.09648	1.35519	0.568502	2.0893	0.648634	2.85759
0.31	0.31	34.16	9.317	0	P04216	THY1	Thy-1 membrane glycoprotein	0	1.03753	0.926979	2.0893	0.496592	2.1677	1.14815	0.774914	2.0893	0.549541	2.39883	0.895365	0.841727	2.0893	0.428549	1.87068
0.05	0.09	28.21	1.902	1.109	P04844	RPN2	REVERSED Dolichyl-diphosphooligosaccharide--protein glycosyltransferase subunit 2	1	1.65959	0.411812	2.0893	0.794328	3.49945	1.99526	0.325265	2.10863	0.946237	4.16869	0.824138	0.725592	2.10863	0.394457	1.7378
0.07	0.13	39.29	2.632	0	P05362	ICAM1	Intercellular adhesion molecule 1	0	0.816582	0.636638	5.49541	0.148594	4.48745	0.698232	0.495538	2.53513	0.275423	1.77011	1.15878	0.77324	2.1677	0.534564	2.51189
0.3	0.36	60.15	4.215	0	P05937	CALB1	Calbindin	0	0.847227	0.762639	2.10863	0.405508	1.78649	0.698232	0.532535	2.0893	0.331131	1.45881	1.21339	0.698984	2.10863	0.57544	2.53513
0.07	9.47	76.79	56.25	51.79	P06887	LV108	Ig lambda chain V-I region MEM	11	0.313329	0.286702	2.05116	0.0301995	0.642688	0.731139	0.712516	1.67494	0.37325	1.22462	0.401791	0.203371	2.01372	0.057544	0.809096
1.52	1.55	36.22	3.346	3.346	P07237	P4HB	Protein disulfide-isomerase	1	0.319154	0.363801	4.28548	0.0666807	1.36773	0.251189	0.265245	2.31206	0.047863	0.580764	1.39316	0.609297	4.40555	0.316228	7.72681
1.57	2.11	35.3	7.668	3.674	P07359	GP1BA	Platelet glycoprotein Ib alpha chain	3	1.00925	0.797145	1.44544	0.698232	1.48594	0.619441	0.326463	1.49969	0.366438	0.928966	1.70608	0.369754	1.64437	1.03753	2.96483
1.55	1.77	33.59	7.061	1.908	P07602	PSAP	Proactivator polypeptide	1	0.704693	0.817113	4.52898	0.145881	3.19154	1.27057	0.470664	4.48745	0.283139	6.08135	0.57544	0.569968	4.32514	0.0954993	2.48886
0.05	0.05	47.44	4.487	0	P07998	RNASE1	Ribonuclease pancreatic	0	1.72187	0.373557	1.38038	1.24738	2.37684	1.30617	0.593513	1.78649	0.731139	2.31206	1.30617	0.585576	2.208	0.591562	2.88403
0.06	0.49	31.39	2.293	0.8818	P0C1S8	WEE2	Wee1-like protein kinase 2	1	1.1272	0.764857	2.46604	0.457088	2.77971	1.03753	0.862515	3.66438	0.283139	3.80189	1.07647	0.894193	2.39883	0.448745	2.58226
0.08	0.08	33.77	2.453	1.321	P0C7H9	USP17L7	Inactive ubiquitin carboxyl-terminal hydrolase 17-like protein 7	1	3.10456	0.219849	1.61436	1.92309	5.10505	2.93765	0.234724	1.40605	2.0893	4.16869	1.04713	0.879551	1.47231	0.711214	1.5417
0.06	0.25	44.2	3.143	0	P12081	HARS	Histidyl-tRNA synthetase, cytoplasmic	0	0.648634	0.164455	1.38038	0.448745	0.895365	0.648634	0.20959	1.2942	0.47863	0.83946	0.990832	0.548678	1.23595	0.801678	1.22462
0.13	0.15	51.68	6.711	0	P12235	SLC25A4	ADP/ATP translocase 1	0	0.672977	0.502165	2.0893	0.319154	1.40605	0.42462	0.276535	2.10863	0.203236	0.895365	1.55597	0.452315	2.0893	0.744732	3.28095
0.84	1.11	29.82	3.401	2.948	P12830	CDH1	Cadherin-1	3	1.19124	0.669965	5.34564	0.222843	6.36796	1.22462	0.640225	20.5116	0.0597035	20.893	0.963829	0.959527	5.59758	0.172187	5.39511
0.09	0.54	44.44	4.505	0	P13804	ETFA	REVERSED Electron transfer flavoprotein subunit alpha, mitochondrial	0	1.80302	0.281496	2.75423	0.654636	4.96592	1.95885	0.241768	5.01187	0.390841	9.90832	0.903649	0.761531	2.10863	0.432514	1.90546
0.09	0.12	37.35	4.418	0	P13984	GTF2F2	General transcription factor IIF subunit 2	0	2.24905	0.392502	1.64437	1.36773	12.0226	1.92309	0.438325	1.45881	1.31826	10.2802	1.15878	0.87694	1.36773	0.847227	1.67494
0.05	0.11	43.61	6.767	0	P15428	HPGD	REVERSED 15-hydroxyprostaglandin dehydrogenase [NAD+]	0	0.501187	0.331537	2.0893	0.237684	1.04713	0.954993	0.938572	2.0893	0.457088	1.99526	0.519996	0.347453	2.0893	0.248886	1.08643
0.08	0.42	24.34	6.579	0	P15531	NME1	Nucleoside diphosphate kinase A	0	9.0365	0.111737	2.10863	4.28548	18.8799	6.25173	0.133337	2.0893	2.99226	13.0617	1.43219	0.521586	2.0893	0.685488	2.99226
0.06	0.14	17.94	1.176	0	P16520	GNB3	Guanine nucleotide-binding protein G(I)/G(S)/G(T) subunit beta-3	0	0.816582	0.703317	2.0893	0.390841	1.70608	1.36773	0.561843	2.0893	0.654636	2.85759	0.591562	0.411493	2.0893	0.283139	1.23595
0.09	0.11	47.98	1.57	0	P17036	ZNF3	REVERSED Zinc finger protein 3	0	0.619441	0.591219	2.05116	0.291072	1.27057	1.39316	0.657003	2.46604	0.564937	3.46737	0.440555	0.40687	2.01372	0.207014	0.887156
0.05	0.05	57.61	0	0	P18621	RPL17	60S ribosomal protein L17	0	1.48594	0.370584	22.08	0.0672977	23.5505	1.64437	0.316579	22.9087	0.0717794	25.1189	0.895365	0.801069	2.0893	0.42462	1.87068
0.41	0.42	54.85	2.913	0	P20290	BTF3	Transcription factor BTF3	0	0.847227	0.697052	1.99526	0.42462	1.69044	1.15878	0.836568	2.14783	0.539511	2.48886	0.731139	0.579125	1.49969	0.483059	1.09648
0.29	0.39	47.45	3.259	1.426	P20813	CYP2B6	REVERSED Cytochrome P450 2B6	1	46.9894	0.0250475	1.7378	27.0396	66.6807	50.5825	0.0241133	1.65959	30.479	69.1831	0.862979	0.504772	1.0666	0.809096	0.92045
0.1	3.71	44.7	4.263	0.9744	P21802	FGFR2	Fibroblast growth factor receptor 2	2	1.61436	0.373656	1.5417	1.04713	2.46604	1.1695	0.661471	1.38038	0.847227	1.61436	1.36773	0.528174	1.38038	0.990832	1.88799
0.68	0.69	38.11	0.9101	0.9101	P23497	SP100	Nuclear autoantigen Sp-100	1	0.636796	0.777375	1.8197	0.285759	1.15878	0.591562	0.651149	1.59956	0.30479	0.946237	1.10662	0.84666	1.72187	0.642688	1.88799
0.17	0.26	50.6	6.627	0	P23528	CFL1	Cofilin-1	0	1.15878	0.736455	2.22844	0.519996	2.58226	0.809096	0.674321	2.0893	0.387258	1.69044	1.41906	0.499747	2.0893	0.679204	2.96483
0.23	0.27	45.01	3.259	0	P24903	CYP2F1	Cytochrome P450 2F1	0	1.04713	0.352002	1.20226	0.870964	1.25892	0.912011	0.153091	1.48594	0.613762	1.35519	1.13763	0.110594	1.34276	0.847227	1.52757
0.13	0.13	35.35	2.02	0	P25325	MPST	3-mercaptopyruvate sulfurtransferase	0	0.903649	0.854924	2.0893	0.432514	1.88799	0.539511	0.365465	2.10863	0.258226	1.13763	1.65959	0.41406	2.0893	0.794328	3.46737
0.14	0.14	49.05	2.662	0	P25786	PSMA1	Proteasome subunit alpha type-1	0	0.870964	0.651838	5.80764	0.149969	5.05825	0.972747	0.969858	2.65461	0.366438	2.58226	0.887156	0.674309	2.1677	0.405508	1.92309
0.05	0.14	19.62	2.419	0	P26439	HSD3B2	REVERSED 3 beta-hydroxysteroid dehydrogenase/Delta 5-->4-isomerase type 2	0	1.55597	0.458021	2.10863	0.737904	3.25087	1.58489	0.441262	2.0893	0.758578	3.31131	0.963829	0.960254	2.0893	0.461318	2.01372
1.08	1.09	29.5	3.916	1.175	P27487	DPP4	Dipeptidyl peptidase 4	1	1.39316	0.680363	1.64437	0.847227	2.33346	1.13763	0.913412	1.77011	0.642688	2.03236	1.21339	0.751119	1.19124	1.01859	1.44544
0.2	2.32	59.07	3.721	1.163	P28330	ACADL	REVERSED Long-chain specific acyl-CoA dehydrogenase, mitochondrial	1	1.7378	0.388003	2.10863	0.824138	3.63078	1.5417	0.460985	2.0893	0.737904	3.22107	1.11686	0.813495	2.0893	0.534564	2.33346
0.38	0.39	28.99	1.372	1.372	P29353	SHC1	REVERSED SHC-transforming protein 1	1	0.349945	0.546666	1.6293	0.251189	0.570164	0.272898	0.49897	1.92309	0.159956	0.524808	1.25892	0.911409	1.23595	1.01859	1.75388
0.07	0.08	23.66	2.679	0	P30041	PRDX6	Peroxiredoxin-6	0	1.00925	0.842851	1.6293	0.619441	1.64437	0.487529	0.473024	2.44343	0.119124	1.19124	2.05116	0.556504	2.48886	0.824138	8.62979
0.05	0.08	36.53	2.786	0	P30291	WEE1	REVERSED Wee1-like protein kinase	0	0.42462	0.64322	1.64437	0.185353	0.698232	1.35519	0.819701	1.25892	1.07647	1.80302	0.301995	0.526999	1.88799	0.125893	0.570164
0.08	0.08	34.79	0.9036	0	P31040	SDHA	REVERSED Succinate dehydrogenase [ubiquinone] flavoprotein subunit, mitochondrial	0	0.505825	0.221534	2.44343	0.183654	1.23595	0.744732	0.336417	2.29087	0.296483	1.70608	0.685488	0.486322	2.26987	0.291072	1.55597
0.14	0.21	39.05	8.026	0	P31146	CORO1A	Coronin-1A	0	1.39316	0.54093	2.0893	0.666807	2.91072	0.57544	0.39618	2.0893	0.275423	1.20226	2.42103	0.263863	2.10863	1.14815	5.05825
0.06	0.14	29.31	3.326	0	P31751	AKT2	RAC-beta serine/threonine-protein kinase	0	51.0505	0.0316615	2.33346	21.8776	89.5365	19.5884	0.0855701	3.63078	5.39511	40.5508	2.85759	0.135474	1.94089	1.47231	5.49541
0.06	0.48	15.75	6.849	0	P35225	IL13	REVERSED Interleukin-13	0	2.208	0.290696	2.58226	0.855067	5.70164	2.22844	0.282453	2.10863	1.05682	4.69894	0.981748	0.956516	5.49541	0.178649	5.39511
1.7	9.43	67.41	29.63	23.7	P36980	CFHR2	Complement factor H-related protein 2	8	1.11686	0.859837	1.40605	0.794328	1.67494	0.794328	0.859791	1.40605	0.487529	1.11686	1.38038	0.732039	1.43219	0.963829	2.51189
0.14	0.2	43.14	2.832	1.852	P40189	IL6ST	Interleukin-6 receptor subunit beta	1	0.928966	0.891223	2.0893	0.444631	1.94089	0.954993	0.938865	2.0893	0.457088	1.99526	0.963829	0.951569	2.0893	0.461318	2.01372
0.1	0.34	46	4.5	0	P40617	ARL4A	REVERSED ADP-ribosylation factor-like protein 4A	0	0.83946	0.103752	1.7378	0.465586	1.45881	0.972747	0.648562	1.48594	0.648634	1.44544	0.855067	0.0344482	1.24738	0.679204	1.0666
0.18	0.19	22.69	1.664	1.059	P40967	PMEL	Melanocyte protein PMEL	1	0.744732	0.602064	2.0893	0.356451	1.55597	0.903649	0.850429	2.0893	0.432514	1.88799	0.824138	0.713945	2.0893	0.390841	1.72187
0.09	0.13	28.84	1.823	0.6339	P41252	IARS	Isoleucyl-tRNA synthetase, cytoplasmic	1	0.613762	0.199509	2.12814	0.288403	1.30617	0.895365	0.705044	2.0893	0.428549	1.87068	0.685488	0.234889	2.0893	0.325087	1.43219
1.03	1.04	26.54	1.4	0.2864	P42858	HTT	Huntingtin	1	0.337287	0.00635187	2.05116	0.0515229	0.691831	0.591562	0.0236306	3.76704	0.140605	2.22844	0.554626	0.0348809	2.55859	0.0794328	1.41906
0.15	0.46	50.92	2.671	0.8347	P43652	AFM	REVERSED Afamin	1	1.14815	0.771576	2.0893	0.549541	2.39883	0.77983	0.654244	2.0893	0.37325	1.6293	1.45881	0.50685	2.10863	0.691831	3.04789
0.3	0.35	31.31	2.875	0	P45381	ASPA	REVERSED Aspartoacylase	0	0.672977	0.545997	1.28233	0.483059	0.862979	0.912011	0.842031	1.1272	0.794328	1.02802	0.731139	0.650531	1.25892	0.534564	0.92045
0.23	0.28	52.71	4.693	0	P47756	CAPZB	F-actin-capping protein subunit beta	0	0.831764	0.727167	2.0893	0.394457	1.7378	0.679204	0.51161	2.0893	0.325087	1.41906	1.21339	0.701131	2.10863	0.57544	2.53513
0.39	0.4	21.85	3.081	1.681	P47898	HTR5A	REVERSED 5-hydroxytryptamine receptor 5A	1	1.01859	0.886975	1.44544	0.704693	1.47231	1	0.907386	1.47231	0.679204	1.47231	1.00925	0.979052	1.38038	0.731139	1.39316
0.09	1.94	33.41	4.773	1.193	P48544	KCNJ5	REVERSED G protein-activated inward rectifier potassium channel 4	1	0.380189	0.773326	2.51189	0.083946	0.954993	1.40605	0.0916136	1.77011	0.794328	2.53513	0.277971	0.0347647	2.53513	0.0510505	0.704693
0.06	0.11	31.54	3.393	0	P48549	KCNJ3	REVERSED G protein-activated inward rectifier potassium channel 1	0	0.619441	0.441201	2.0893	0.293765	1.2942	0.903649	0.854037	2.0893	0.432514	1.88799	0.672977	0.509439	2.10863	0.322107	1.41906
1.18	1.23	58.63	3.761	2.876	P48735	IDH2	Isocitrate dehydrogenase [NADP], mitochondrial	1	5.54626	0.142586	2.10863	2.63027	11.5878	5.44503	0.143579	2.0893	2.60615	11.4815	1	0.980014	2.0893	0.47863	2.0893
0.83	0.85	55	5.714	5.714	P49450	CENPA	REVERSED Histone H3-like centromeric protein A	1	0.501187	0.580869	1.41906	0.380189	0.711214	1.14815	0.866921	1.23595	0.928966	1.51356	0.440555	0.488091	1.47231	0.263027	0.648634
0.13	0.13	53.97	5.556	0	P49773	HINT1	REVERSED Histidine triad nucleotide-binding protein 1	0	1.15878	0.91538	1.57036	0.737904	1.83654	0.83946	0.764281	1.59956	0.515229	1.34276	1.36773	0.693788	1.57036	0.870964	2.18776
0.07	0.15	79.41	8.824	0	P50151	GNG10	Guanine nucleotide-binding protein G(I)/G(S)/G(O) subunit gamma-10	0	1.02802	0.912512	1.47231	0.698232	1.51356	1.02802	0.918666	1.8197	0.564937	1.87068	0.990832	0.993737	2.42103	0.409261	2.39883
0.05	0.22	41.13	6.619	0	P50440	GATM	Glycine amidinotransferase, mitochondrial	0	1.77011	0.324146	6.79204	0.260615	12.0226	1.38038	0.304891	21.4783	0.0642688	22.4905	1.25892	0.914807	20.7014	0.0608135	21.4783
0.25	0.38	43.54	6.803	0	P50583	NUDT2	Bis(5'-nucleosyl)-tetraphosphatase [asymmetrical]	0	40.5508	0.0236127	2.33346	17.378	70.4693	37.6704	0.0252412	2.18776	17.2187	65.4636	1	0.332018	1.67494	0.597035	1.67494
0.08	0.09	49.3	0	0	P50914	RPL14	60S ribosomal protein L14	0	2.05116	0.113439	1.78649	1.14815	5.01187	1.55597	0.0823679	1.65959	0.937562	3.66438	1.35519	0.634647	1.64437	0.824138	2.1677
0.17	2.28	50.41	5.285	2.439	P51572	BCAP31	B-cell receptor-associated protein 31	1	0.862979	0.767367	1.43219	0.564937	1.23595	1.44544	0.863275	1.30617	1.10662	2.39883	0.586138	0.655615	1.31826	0.343558	0.772681
0.09	0.15	45.55	3.727	0	P52209	PGD	6-phosphogluconate dehydrogenase, decarboxylating	0	1.07647	0.869425	2.0893	0.515229	2.24905	0.862979	0.783871	2.0893	0.413047	1.80302	1.23595	0.674432	2.0893	0.591562	2.58226
0.32	0.51	46.65	6.434	0	P53367	ARFIP1	Arfaptin-1	0	2.1677	0.29409	2.0893	1.03753	4.57088	2.63027	0.241794	2.0893	1.25892	5.54626	0.816582	0.706578	2.0893	0.390841	1.70608
0.05	0.12	50	2.848	0	P53370	NUDT6	Nucleoside diphosphate-linked moiety X motif 6	0	0.625173	0.447421	2.0893	0.299226	1.30617	0.903649	0.853311	2.0893	0.432514	1.88799	0.685488	0.51769	2.0893	0.328095	1.43219
0.3	0.49	55.71	3.599	1.095	P54652	HSPA2	REVERSED Heat shock-related 70 kDa protein 2	1	0.879022	0.923324	1.39316	0.608135	1.22462	2.35505	0.793481	1.69044	1.39316	5.54626	0.353183	0.726945	1.90546	0.194089	0.672977
0.08	0.33	55.77	6.868	0	P55039	DRG2	Developmentally-regulated GTP-binding protein 2	0	1.18032	0.727858	2.0893	0.564937	2.46604	0.672977	0.507025	2.10863	0.322107	1.41906	1.7378	0.38772	2.0893	0.831764	3.63078
0.05	0.05	41.72	3.311	0	P56539	CAV3	Caveolin-3	0	0.337287	0.56469	3.0761	0.083946	1.03753	5.59758	0.197162	1.48594	3.76704	15.9956	0.0758578	0.158239	3.13329	0.0201372	0.237684
0.07	0.08	12.67	3.62	0	P58753	TIRAP	Toll/interleukin-1 receptor domain-containing adapter protein	0	0.77983	0.650098	2.0893	0.37325	1.6293	0.77983	0.61571	2.48886	0.313329	1.94089	0.990832	0.951136	3.90841	0.253513	3.87258
0.21	0.23	28.97	2.381	0	P60827	C1QTNF8	REVERSED Complement C1q tumor necrosis factor-related protein 8	0	0.903649	0.805627	1.65959	0.544503	1.49969	1.11686	0.850842	1.45881	0.765597	1.6293	0.809096	0.677998	1.38038	0.586138	1.11686
0.18	0.24	21.08	3.514	0	P60893	GPR85	REVERSED Probable G-protein coupled receptor 85	0	0.586138	0.836949	1.58489	0.291072	0.928966	0.92045	0.881176	1.47231	0.608135	1.35519	0.619441	0.730423	1.5417	0.349945	0.954993
0.16	1.26	46.7	7.868	1.269	P61160	ACTR2	Actin-related protein 2	1	0.625173	0.43654	2.0893	0.299226	1.30617	0.751623	0.543734	4.40555	0.169044	3.31131	0.824138	0.785093	8.47227	0.0972747	6.98232
0.06	0.27	54.37	11.65	0	P62805	HIST1H4A	REVERSED Histone H4	0	1.1272	0.802203	2.10863	0.534564	2.35505	1.19124	0.722418	2.10863	0.564937	2.48886	0.937562	0.908431	2.0893	0.448745	1.95885
0.05	0.29	37.64	5.618	0	P62913	RPL11	60S ribosomal protein L11	0	1.03753	0.923423	2.0893	0.496592	2.1677	1.20226	0.707725	2.0893	0.57544	2.51189	0.855067	0.772458	2.0893	0.409261	1.78649
0.64	0.81	40.1	16.67	7.292	P63000	RAC1	Ras-related C3 botulinum toxin substrate 1	1	0.597035	0.0761528	3.53183	0.169044	2.10863	0.737904	0.238885	9.37562	0.0787046	6.91831	0.801678	0.0362433	2.65461	0.299226	2.12814
1.9	2.64	56.45	10.48	2.823	P67936	TPM4	Tropomyosin alpha-4 chain	1	0.772681	0.433181	1.52757	0.487529	1.18032	0.619441	0.187731	1.77011	0.316228	1.09648	1.23595	0.288101	1.61436	0.765597	2.14783
1.51	1.53	31.31	1.889	1.215	P78563	ADARB1	Double-stranded RNA-specific editase 1	1	0.717794	0.045781	1.41906	0.401791	1.01859	0.765597	0.0291096	1.44544	0.448745	1.10662	0.928966	0.0322264	1.47231	0.60256	1.36773
0.59	1.02	72.03	38.98	22.88	P80419	HV322	Ig heavy chain V-III region GAR	2	0.529663	0.715068	1.6293	0.101859	0.862979	0.824138	0.883748	1.28233	0.42462	1.05682	0.625173	0.817144	1.61436	0.157036	1.00925
0.2	0.84	36.04	18.92	8.108	P80422	LV212	Ig gamma lambda chain V-II region DOT	1	0.831764	0.642254	4.44631	0.183654	3.69828	0.296483	0.905558	4.44631	0.0666807	1.31826	3.28095	0.714988	4.52898	0.724436	14.5881
0.36	0.39	45.41	3.294	0	P84022	SMAD3	Mothers against decapentaplegic homolog 3	0	1.36773	0.56247	2.0893	0.654636	2.85759	1.11686	0.810738	2.0893	0.534564	2.33346	1.21339	0.697548	2.0893	0.580764	2.53513
0.1	0.1	28.4	2.141	1.025	P98160	HSPG2	Basement membrane-specific heparan sulfate proteoglycan core protein	3	7.17794	0.138441	4.52898	1.58489	31.9154	2.1677	0.314598	3.10456	0.698232	7.31139	3.25087	0.228166	4.32514	0.751623	14.0605
0.23	0.24	24.05	1.116	0.1859	P98161	PKD1	Polycystin-1	1	0.879022	0.654653	1.33045	0.666807	1.1695	0.809096	0.62427	1.41906	0.564937	1.14815	1.08643	0.957379	1.59956	0.679204	1.7378
1.55	7.93	57.88	25.15	15.15	Q02985	CFHR3	Complement factor H-related protein 3	17	2.83139	0.232052	2.46604	1.14815	10.1859	0.787046	0.750627	1.92309	0.299226	1.51356	3.59749	0.202696	2.72898	1.31826	17.378
0.1	0.11	18.49	2.311	0	Q03828	EVX2	Homeobox even-skipped homolog protein 2	0	1.39316	0.5443	2.0893	0.666807	2.91072	1.31826	0.602429	2.10863	0.625173	2.75423	1.04713	0.905864	2.0893	0.501187	2.18776
0.05	0.1	29.34	2.279	0	Q04446	GBE1	1,4-alpha-glucan-branching enzyme	0	5.01187	0.150689	2.0893	2.39883	10.5682	3.46737	0.193439	2.10863	1.64437	7.24436	1.44544	0.514194	2.10863	0.685488	3.01995
1.6	1.61	38.14	4.487	4.487	Q08830	FGL1	Fibrinogen-like protein 1	1	1.77011	0.374196	2.0893	0.847227	3.69828	0.636796	0.454633	5.70164	0.111686	3.63078	2.75423	0.229364	6.0256	0.457088	16.5959
0.23	0.26	25.95	2.013	0	Q08AI8	C2orf54	REVERSED Uncharacterized protein C2orf54	0	2.0893	0.422831	2.12814	0.981748	6.91831	1.55597	0.620662	2.07014	0.751623	6.42688	1.34276	0.656267	1.8197	0.737904	2.51189
0.06	0.17	59.9	5.33	0	Q0D2J5	ZNF763	Zinc finger protein 763	0	1.02802	0.918554	9.72747	0.105682	10	0.963829	0.757065	3.19154	0.301995	3.0761	1.04713	0.689784	19.2309	0.0544503	19.2309
0.25	0.31	59.39	5.076	0	Q0P5N6	ARL16	REVERSED ADP-ribosylation factor-like protein 16	0	3.13329	0.00225366	2.1677	1.44544	6.60694	4.40555	0.00207429	2.37684	1.85353	14.5881	0.685488	0.465939	1.61436	0.405508	1.10662
0.12	0.12	27.81	4.142	0	Q13232	NME3	REVERSED Nucleoside diphosphate kinase 3	0	0.461318	0.478607	1.49969	0.296483	0.691831	0.432514	0.429616	1.43219	0.285759	0.619441	1.05682	0.886513	1.47231	0.717794	1.5417
0.1	0.17	35.5	3.435	0	Q13362	PPP2R5C	REVERSED Serine/threonine-protein phosphatase 2A 56 kDa regulatory subunit gamma isoform	0	1	0.991916	2.0893	0.47863	2.0893	0.990832	0.998279	2.0893	0.474242	2.07014	1	0.990196	2.0893	0.47863	2.0893
0.1	0.15	50.94	4.667	0.5958	Q13523	PRPF4B	Serine/threonine-protein kinase PRP4 homolog	1	0.698232	0.625431	1.38038	0.505825	0.963829	1.97697	0.370519	1.38038	1.43219	2.75423	0.349945	0.27304	1.51356	0.229087	0.529663
0.16	0.18	42.96	1.852	0	Q13670	PMS2P11	REVERSED Putative postmeiotic segregation increased 2-like protein 11	0	0.394457	0.334333	2.18776	0.159956	0.862979	0.226986	0.343424	2.63027	0.0831764	0.597035	1.83654	0.964734	2.14783	0.855067	4.05509
0.56	0.61	48.79	2.418	1.538	Q13867	BLMH	Bleomycin hydrolase	1	0.586138	0.406364	2.0893	0.277971	1.22462	0.711214	0.549362	2.0893	0.337287	1.48594	0.816582	0.708908	2.0893	0.390841	1.70608
0.1	0.16	32.47	1.623	0	Q13889	GTF2H3	General transcription factor IIH subunit 3	0	0.325087	0.787713	2.26987	0.0465586	0.737904	1.02802	0.996056	1.48594	0.691831	1.52757	0.319154	0.791241	2.14783	0.0343558	0.685488
1.85	1.87	13.58	3.019	3.019	Q14002	CEACAM7	Carcinoembryonic antigen-related cell adhesion molecule 7	1	0.413047	0.322074	1.88799	0.201372	0.77983	0.413047	0.340849	2.70396	0.148594	1.11686	0.981748	0.92443	2.72898	0.363078	2.67917
0.29	2.27	56.07	4.673	1.402	Q14254	FLOT2	REVERSED Flotillin-2	1	20.1372	0.867663	1.8197	11.0662	29.6483	20.1372	0.952584	1.75388	11.4815	27.5423	0.903649	0.669669	1.20226	0.751623	1.08643
0.12	0.48	37.58	5.219	0	Q14790	CASP8	Caspase-8	0	22.6987	0.128879	3.87258	5.86138	83.946	26.3027	0.11965	3.98107	6.60694	86.2979	0.824138	0.765554	1.38038	0.597035	1.13763
0.18	0.29	29.11	3.767	1.484	Q14974	KPNB1	Importin subunit beta-1	1	0.222843	0.163766	2.10863	0.10666	0.469894	0.301995	0.202161	2.0893	0.143219	0.630957	0.737904	0.586786	2.0893	0.349945	1.5417
0.06	0.12	52.08	1.939	0	Q15019	2002-09-01	REVERSED Septin-2	0	0.549541	0.703664	1.57036	0.214783	0.862979	1.05682	0.923096	1.44544	0.731139	1.55597	0.501187	0.644985	1.83654	0.195884	0.92045
0.05	0.13	22.48	3.583	0	Q15078	CDK5R1	REVERSED Cyclin-dependent kinase 5 activator 1	0	1.09648	0.749612	4.16869	0.263027	4.57088	0.963829	0.817029	6.79204	0.141906	6.54636	1.1272	0.606726	19.4089	0.0580764	19.5884
0.12	0.19	36.59	4.091	0	Q15084	PDIA6	REVERSED Protein disulfide-isomerase A6	0	1.83654	0.390927	1.87068	0.981748	4.96592	0.544503	0.920454	1.97697	0.280543	1.07647	3.83707	0.365874	2.42103	1.58489	9.46237
0.19	5.1	56.21	17.8	9.322	Q15166	PON3	Serum paraoxonase/lactonase 3	4	0.717794	0.620282	1.78649	0.366438	1.28233	0.654636	0.927215	1.99526	0.30761	1.30617	1.11686	0.680236	1.75388	0.636796	2.24905
0.06	0.09	50.32	4.459	0	Q15170	TCEAL1	REVERSED Transcription elongation factor A protein-like 1	0	1.2942	0.620294	2.0893	0.619441	2.70396	1.65959	0.41532	2.10863	0.787046	3.46737	0.772681	0.642091	2.0893	0.369828	1.61436
0.06	4.05	34.1	2.778	1.543	Q15397	KIAA0020	Pumilio domain-containing protein KIAA0020	2	5.49541	0.143229	2.10863	2.60615	11.4815	5.34564	0.145467	2.10863	2.53513	11.1686	1.01859	0.955783	2.0893	0.487529	2.12814
0.06	0.09	57.04	0	0	Q15475	SIX1	Homeobox protein SIX1	0	1.22462	0.67994	3.46737	0.353183	4.2462	1.49969	0.484796	2.80543	0.534564	4.20727	0.809096	0.705308	2.0893	0.387258	1.69044
1.33	1.44	42.81	9.904	4.153	Q15485	FCN2	Ficolin-2	1	1.05682	0.836821	1.35519	0.77983	1.5417	0.549541	0.488021	1.65959	0.0903649	0.912011	1.83654	0.394203	1.52757	1.20226	14.5881
0.05	0.14	38.67	1.563	0	Q15527	SURF2	REVERSED Surfeit locus protein 2	0	3.13329	0.208041	2.0893	1.49969	6.60694	3.40408	0.19539	2.0893	1.6293	7.17794	0.912011	0.871339	2.0893	0.436516	1.90546
0.91	0.93	30.59	2.972	1.923	Q15942	ZYX	Zyxin	2	0.862979	0.484244	1.7378	0.496592	1.49969	0.816582	0.31282	1.5417	0.529663	1.25892	1.04713	0.6748	1.69044	0.619441	1.77011
0.06	0.12	57.66	3.448	0	Q16222	UAP1	REVERSED UDP-N-acetylhexosamine pyrophosphorylase	0	1.88799	0.402798	6.98232	0.270396	28.5759	2.35505	0.300988	26.546	0.0887156	31.3329	0.895365	0.660015	21.8776	0.0496592	19.5884
1.35	1.35	47.16	10.64	4.61	Q16270	IGFBP7	Insulin-like growth factor-binding protein 7	1	1.23595	0.572084	1.33045	0.928966	1.64437	0.870964	0.921615	1.85353	0.469894	1.61436	1.40605	0.623305	1.45881	0.963829	2.05116
0.07	0.11	35.34	12.93	0	Q16568	CARTPT	Cocaine- and amphetamine-regulated transcript protein	0	0.483059	0.316836	2.0893	0.229087	1.00925	0.359749	0.235652	2.10863	0.172187	0.758578	1.31826	0.595916	2.0893	0.630957	2.77971
0.11	0.18	42.73	2.035	0	Q16589	CCNG2	REVERSED Cyclin-G2	0	1.48594	0.758239	1.44544	1.02802	2.37684	0.946237	0.763727	1.39316	0.564937	1.31826	1.5417	0.993659	1.57036	0.981748	3.10456
0.06	0.17	66.39	3.782	0	Q16629	SRSF7	REVERSED Serine/arginine-rich splicing factor 7	0	3.16228	0.254716	4.7863	0.660694	22.6987	2.22844	0.331014	4.92039	0.452898	12.7057	1.44544	0.647692	4.36516	0.331131	6.42688
0.08	0.15	59.66	4.202	0	Q16629	SRSF7	Serine/arginine-rich splicing factor 7	0	0.870964	0.934182	2.1677	0.401791	1.88799	0.870964	0.828085	1.70608	0.510505	1.48594	0.990832	0.890915	1.48594	0.666807	1.47231
0.42	0.42	26.63	4.734	0	Q2NL98	VMAC	REVERSED Vimentin-type intermediate filament-associated coiled-coil protein	0	0.717794	0.606396	2.83139	0.253513	2.03236	0.731139	0.600671	2.0893	0.349945	1.52757	0.972747	0.991323	2.0893	0.465586	2.03236
0.08	0.4	79.72	8.491	0	Q2TAM9	TUSC1	REVERSED Tumor suppressor candidate gene 1 protein	0	1.09648	0.845618	2.10863	0.519996	2.29087	1.33045	0.59194	2.0893	0.636796	2.77971	0.816582	0.705497	2.0893	0.390841	1.70608
0.17	0.27	17.29	6.767	0	Q30154	HLA-DRB5	HLA class II histocompatibility antigen, DR beta 5 chain	0	0.57544	0.465107	2.01372	0.246604	1.15878	0.246604	0.258908	2.67917	0.0328095	0.660694	2.33346	0.440806	2.46604	0.946237	9.72747
0.05	0.12	41.92	3.892	0	Q3SYC2	MOGAT2	REVERSED 2-acylglycerol O-acyltransferase 2	0	0.501187	0.331537	2.0893	0.237684	1.04713	0.954993	0.938572	2.0893	0.457088	1.99526	0.519996	0.347453	2.0893	0.248886	1.08643
0.05	0.13	37.68	3.953	0	Q496Y0	LONRF3	REVERSED LON peptidase N-terminal domain and RING finger protein 3	0	1	0.992295	2.0893	0.47863	2.0893	0.772681	0.636218	2.0893	0.366438	1.61436	1.28233	0.630796	2.10863	0.608135	2.67917
0.35	0.44	26.7	3.047	1.254	Q49MI3	CERKL	REVERSED Ceramide kinase-like protein	1	0.937562	0.82115	1.40605	0.666807	1.31826	1.04713	0.901777	1.44544	0.724436	1.51356	0.887156	0.733937	1.51356	0.586138	1.34276
0.05	0.15	63.39	3.15	0	Q4G0S7	CCDC152	REVERSED Coiled-coil domain-containing protein 152	0	1.04713	0.912333	2.0893	0.501187	2.18776	1.1272	0.793005	2.0893	0.539511	2.35505	0.92045	0.875235	2.0893	0.436516	1.92309
0.06	0.13	41.14	1.818	0	Q4G148	GXYLT1	REVERSED Glucoside xylosyltransferase 1	0	1.14815	0.770823	2.0893	0.549541	2.39883	1.41906	0.530269	2.0893	0.679204	2.96483	0.801678	0.688364	2.0893	0.383707	1.67494
0.16	0.32	43.75	1.91	0	Q4G176	ACSF3	Acyl-CoA synthetase family member 3, mitochondrial	0	1.88799	0.689837	4.57088	0.413047	11.1686	4.09261	0.263392	2.55859	1.59956	41.6869	0.390841	0.33086	3.25087	0.0698232	1.27057
0.11	0.57	47.52	7.58	0	Q53EV4	LRRC23	REVERSED Leucine-rich repeat-containing protein 23	0	0.963829	0.905043	1.1695	0.824138	1.1272	1.01859	0.93989	1.19124	0.855067	1.21339	0.937562	0.847055	1.21339	0.765597	1.13763
0.07	0.09	26.65	2.278	0	Q53RD9	FBLN7	REVERSED Fibulin-7	0	0.316228	0.205191	2.05116	0.092045	0.648634	0.554626	0.279789	1.65959	0.244343	0.92045	0.564937	0.545113	1.87068	0.214783	1.05682
0.1	0.32	29.71	6.366	0	Q5NUL3	O3FAR1	REVERSED Omega-3 fatty acid receptor 1	0	1.02802	0.964473	2.72898	0.376704	2.77971	1.72187	0.591004	2.07014	0.831764	4.2462	0.580764	0.614417	2.208	0.237684	1.28233
0.18	0.19	47.23	1.789	0	Q5QP82	DCAF10	DDB1- and CUL4-associated factor 10	0	1.21339	0.699306	1.8197	0.666807	2.18776	1.30617	0.592762	1.38038	0.946237	1.80302	0.912011	0.854171	2.42103	0.376704	2.208
1.1	1.1	27.27	2.694	2.694	Q5SQ64	LY6G6F	Lymphocyte antigen 6 complex locus protein G6f	1	0.83946	0.749071	2.10863	0.401791	1.77011	1.1695	0.742391	2.0893	0.559758	2.46604	0.711214	0.553651	2.10863	0.340408	1.49969
0.07	0.07	38.12	3.587	0	Q5T681	C10orf62	REVERSED Uncharacterized protein C10orf62	0	0.529663	0.226205	1.77011	0.242103	0.937562	0.416869	0.202256	1.88799	0.130617	0.787046	1.34276	0.787897	1.77011	0.758578	2.96483
0.05	0.1	53.9	3.729	0	Q5T8R8	C9orf66	REVERSED Uncharacterized protein C9orf66	0	2.91072	0.37467	2.58226	1.1272	9.12011	0.349945	0.123589	2.46604	0.134276	0.862979	6.13762	0.0959514	2.46604	2.48886	15.1356
0.05	0.14	29.88	1.524	0	Q5TC12	ATPAF1	ATP synthase mitochondrial F1 complex assembly factor 1	0	0.619441	0.443618	2.0893	0.296483	1.2942	0.870964	0.797994	2.0893	0.416869	1.8197	0.704693	0.545458	2.0893	0.337287	1.47231
0.34	0.45	36.09	2.506	0	Q5TDH0	DDI2	REVERSED Protein DDI1 homolog 2	0	1.13763	0.785846	2.0893	0.544503	2.37684	0.831764	0.727448	2.0893	0.394457	1.7378	1.35519	0.568111	2.0893	0.648634	2.83139
0.09	0.11	44.4	2.161	0.9823	Q5TID7	C1orf114	Uncharacterized protein C1orf114	1	1.31826	0.594559	2.0893	0.630957	2.75423	1.15878	0.759369	2.0893	0.554626	2.42103	1.13763	0.789868	2.0893	0.544503	2.37684
1.15	1.18	34.64	1.569	1.046	Q5VUJ6	LRCH2	Leucine-rich repeat and calponin homology domain-containing protein 2	1	0.92045	0.888381	2.0893	0.440555	1.92309	1.02802	0.943542	2.0893	0.49204	2.14783	0.895365	0.834452	2.0893	0.428549	1.87068
0.05	0.11	35.48	0	0	Q5VZQ5	C10orf122	Putative uncharacterized protein C10orf122	0	1.00925	0.94745	3.59749	0.280543	3.63078	0.809096	0.713071	2.10863	0.387258	1.70608	1.22462	0.757107	3.76704	0.325087	4.61318
0.06	0.39	62.24	6.463	0	Q6P1S2	C3orf33	Uncharacterized protein C3orf33	0	1.08643	0.849359	2.0893	0.519996	2.26987	1.70608	0.398486	2.10863	0.809096	3.56451	0.630957	0.457818	2.10863	0.301995	1.33045
0.05	0.05	50	7.692	0	Q6PB30	CSAG1	Putative chondrosarcoma-associated gene 1 protein	0	10.3753	0.105312	2.10863	4.92039	21.677	2.42103	0.263095	2.10863	1.14815	5.10505	4.2462	0.167636	2.10863	2.01372	8.87156
0.14	0.16	34.16	2.262	0	Q6PID8	KLHDC10	Kelch domain-containing protein 10	0	1.23595	0.702759	3.0761	0.401791	3.80189	1.10662	0.806075	2.0893	0.529663	2.31206	1.10662	0.880665	3.31131	0.334195	3.66438
0.09	0.31	49.55	4.532	0	Q6PKX4	DOK6	REVERSED Docking protein 6	0	0.855067	0.765829	2.0893	0.405508	1.78649	0.608135	0.43262	2.10863	0.291072	1.28233	1.38038	0.550636	2.0893	0.660694	2.91072
0.09	0.09	33.08	2.308	0	Q6PL45	C16orf79	REVERSED BRICHOS domain-containing protein C16orf79	0	0.801678	0.682747	2.0893	0.383707	1.67494	0.724436	0.567621	2.0893	0.343558	1.51356	1.09648	0.836183	2.0893	0.524808	2.29087
0.06	0.13	30.19	3.247	0	Q6Q0C1	SLC25A47	Solute carrier family 25 member 47	0	2.42103	0.263495	2.10863	1.14815	5.05825	2.72898	0.234505	2.0893	1.30617	5.7544	0.879022	0.806118	2.0893	0.420727	1.83654
0.11	0.16	17.46	5.291	0	Q6UW68	TMEM205	Transmembrane protein 205	0	0.963829	0.896903	18.8799	0.0519996	18.197	0.903649	0.875579	19.5884	0.0496592	17.7011	1.0666	0.779256	2.10863	0.505825	2.22844
0.06	0.14	30.03	2.875	0	Q6UXN9	WDR82	REVERSED WD repeat-containing protein 82	0	0.0440555	0.0795411	2.0893	0.020893	0.092045	0.0809096	0.0988268	2.10863	0.0387258	0.170608	0.534564	0.360682	2.10863	0.255859	1.1272
0.25	0.29	39.07	2.799	0.6459	Q6XUX3	DSTYK	Dual serine/threonine and tyrosine protein kinase	1	1.40605	0.196646	2.0893	0.672977	2.93765	1.39316	0.206083	4.32514	0.322107	6.0256	1	0.90317	8.31764	0.120226	8.31764
0.23	2.5	44.66	4.988	0.9501	Q6ZMR5	TMPRSS11A	Transmembrane protease serine 11A	1	0.359749	0.053474	1.88799	0.107647	0.679204	0.660694	0.0513505	1.41906	0.383707	0.937562	0.515229	0.504205	1.65959	0.226986	0.855067
0.1	0.45	59.02	4.897	0	Q6ZMV7	LEKR1	Leucine-, glutamate- and lysine-rich protein 1	0	0.937562	0.92255	2.0893	0.448745	1.95885	1.45881	0.553193	1.64437	0.887156	2.42103	0.636796	0.510447	1.38038	0.461318	0.879022
0.08	0.09	47.07	0.933	0.5937	Q6ZRV2	FAM83H	Protein FAM83H	1	0.981748	0.595819	1.5417	0.619441	1.51356	0.42462	0.434158	2.29087	0.092045	0.972747	2.31206	0.707381	2.58226	0.895365	9.72747
0.05	0.19	11.66	5.521	0	Q6ZRV3	C3orf74	REVERSED Putative uncharacterized protein C3orf74	0	2.31206	0.275012	2.0893	1.10662	4.87529	1.75388	0.381138	2.0893	0.83946	3.69828	1.30617	0.609815	2.10863	0.619441	2.72898
0.1	0.51	43.8	3.4	1	Q6ZSJ9	SHISA6	REVERSED Protein shisa-6 homolog	1	0.801678	0.854336	2.14783	0.346737	1.72187	0.222843	0.309309	2.58226	0.0452898	0.57544	3.76704	0.345041	3.34195	1.1272	15.5597
0.08	1.06	52.16	4.835	1.272	Q6ZV65	FAM47E	Protein FAM47E	1	1.02802	0.756292	1.64437	0.625173	1.70608	1.64437	0.871507	1.5417	1.0666	4.48745	0.619441	0.65255	1.6293	0.260615	1.00925
0.43	0.5	33.59	3.562	2.545	Q6ZV65	FAM47E	REVERSED Protein FAM47E	1	0.244343	0.42072	2.70396	0.0636796	0.660694	0.343558	0.442188	1.94089	0.0474242	0.666807	0.794328	0.945503	2.31206	0.363078	1.83654
0.12	0.23	23.81	4.048	0	Q6ZV70	LANCL3	LanC-like protein 3	0	1.15878	0.751891	1.24738	0.928966	1.44544	1.22462	0.615661	1.44544	0.847227	1.77011	0.937562	0.826863	1.39316	0.672977	1.30617
0.07	2.17	47.3	3.492	1.27	Q70Z53	FRA10AC1	REVERSED Protein FRA10AC1	1	3.66438	0.193777	1.72187	2.12814	9.63829	3.7325	0.261194	1.95885	1.90546	10.4713	1.13763	0.539075	1.48594	0.765597	1.70608
0.1	0.12	23	2.817	0	Q7RTX0	TAS1R3	Taste receptor type 1 member 3	0	0.461318	0.740425	3.0761	0.139316	1.41906	1.41906	0.516681	2.05116	0.691831	3.10456	0.328095	0.399015	3.0761	0.0954993	1.00925
0.38	0.51	32.84	2.985	0	Q7Z6K3	PTAR1	Protein prenyltransferase alpha subunit repeat-containing protein 1	0	0.398107	0.257026	2.0893	0.188799	0.831764	0.524808	0.350451	2.0893	0.248886	1.09648	0.751623	0.606292	2.0893	0.356451	1.57036
0.05	0.08	44.71	1.386	0	Q86T90	KIAA1328	REVERSED Uncharacterized protein KIAA1328	0	0.981748	0.987806	2.0893	0.469894	2.05116	1.7378	0.389768	2.10863	0.824138	3.63078	0.564937	0.385777	2.0893	0.267917	1.18032
0.05	0.11	48.85	2.5	0	Q86TZ1	TTC6	Tetratricopeptide repeat protein 6	0	0.666807	0.737968	1.64437	0.244343	1.09648	1.05682	0.995778	1.58489	0.666807	1.72187	0.630957	0.741522	1.61436	0.231207	1.01859
0.05	0.06	20.15	1.282	0	Q86V42	FAM124A	REVERSED Protein FAM124A	0	2.51189	0.25373	2.10863	1.19124	5.24808	0.685488	0.523185	2.10863	0.328095	1.44544	3.59749	0.187077	2.0893	1.72187	7.58578
0.26	0.26	66.93	3.502	0	Q86V81	THOC4	REVERSED THO complex subunit 4	0	1.04713	0.970629	1.34276	0.77983	1.43219	1.0666	0.961617	1.25892	0.847227	1.35519	0.972747	0.990963	1.28233	0.758578	1.24738
0.05	0.07	31.62	1.622	0	Q86VI4	LAPTM4B	Lysosomal-associated transmembrane protein 4B	0	1.05682	0.914271	1.43219	0.737904	1.52757	1.15878	0.684034	2.07014	0.559758	2.39883	0.903649	0.754449	2.96483	0.30479	2.67917
0.09	0.12	44.7	2.308	0.8395	Q86VM9	ZC3H18	Zinc finger CCCH domain-containing protein 18	1	0.337287	0.487329	2.05116	0.0990832	0.691831	0.416869	0.0716312	1.5417	0.131826	0.642688	0.831764	0.0134817	1.52757	0.49204	1.27057
0.06	0.1	35.44	1.148	0	Q86XR2	FAM129C	Niban-like protein 2	0	2.12814	0.300528	2.0893	1.01859	4.48745	1.08643	0.858947	2.10863	0.515229	2.26987	1.95885	0.33313	2.10863	0.928966	4.09261
0.14	0.15	61.84	6.579	0	Q8IU53	CASC2	Protein CASC2, isoforms 1/2	0	1.14815	0.774527	2.0893	0.549541	2.39883	0.420727	0.270702	5.05825	0.0831764	2.12814	2.70396	0.235567	2.80543	0.963829	7.58578
0.06	0.09	48.31	2.857	0	Q8IU85	CAMK1D	REVERSED Calcium/calmodulin-dependent protein kinase type 1D	0	0.376704	0.387478	1.67494	0.0636796	0.630957	0.337287	0.347042	2.96483	0.060256	1	1.08643	0.865731	2.55859	0.42462	3.59749
0.26	0.33	32.41	2.546	0	Q8IUD6	RNF135	E3 ubiquitin-protein ligase RNF135	0	0.928966	0.899607	2.0893	0.444631	1.94089	0.862979	0.789704	2.0893	0.413047	1.80302	1.0666	0.884232	2.0893	0.510505	2.22844
0.16	0.28	43.98	4.564	0	Q8IUE1	TGIF2LX	REVERSED Homeobox protein TGIF2LX	0	0.608135	0.680232	1.24738	0.390841	0.758578	0.83946	0.8657	1.14815	0.672977	0.963829	0.724436	0.794135	1.19124	0.487529	0.862979
0.05	0.15	51.8	3.047	0	Q8IVD9	NUDCD3	NudC domain-containing protein 3	0	0.77983	0.901149	1.92309	0.226986	1.49969	2.0893	0.512014	2.01372	1.03753	4.20727	0.390841	0.464148	2.12814	0.0928966	0.831764
0.06	0.06	32.69	1.385	0	Q8IVD9	NUDCD3	REVERSED NudC domain-containing protein 3	0	11.0662	0.102379	2.0893	5.29664	23.1206	9.0365	0.111701	2.10863	4.28548	18.8799	1.21339	0.692806	2.0893	0.580764	2.53513
0.05	0.1	23.73	3.39	0	Q8IXB3	TUSC5	REVERSED Tumor suppressor candidate 5	0	1.39316	0.685185	1.83654	0.758578	2.85759	1.99526	0.458472	1.49969	1.33045	3.63078	0.691831	0.655685	1.36773	0.469894	0.946237
0.46	0.46	26.43	2.254	2.254	Q8IZN3	ZDHHC14	Probable palmitoyltransferase ZDHHC14	1	0.990832	0.997967	2.0893	0.474242	2.07014	1.33045	0.590514	2.0893	0.636796	2.77971	0.737904	0.591818	2.10863	0.353183	1.55597
0.06	1.26	65.06	12.05	3.012	Q8IZT9	FAM9C	Protein FAM9C	1	0.824138	0.711029	2.0893	0.394457	1.72187	1.34276	0.565188	2.0893	0.642688	2.83139	0.608135	0.417067	2.0893	0.288403	1.27057
0.09	0.62	57	12	5	Q8N0T1	C8orf59	REVERSED Uncharacterized protein C8orf59	1	6.42688	0.131546	2.10863	3.04789	13.4277	6.54636	0.130028	2.0893	3.13329	13.8038	0.972747	0.963559	2.0893	0.465586	2.03236
0.05	0.12	31.53	1.802	0	Q8N140	EID3	REVERSED EP300-interacting inhibitor of differentiation 3	0	1.52757	0.467762	2.10863	0.724436	3.19154	0.717794	0.550232	2.60615	0.275423	1.87068	2.10863	0.300313	2.10863	1	4.40555
0.13	0.16	32.96	1.311	0	Q8N159	NAGS	N-acetylglutamate synthase, mitochondrial	0	0.772681	0.598493	5.86138	0.130617	4.52898	0.990832	0.899778	5.01187	0.197697	4.96592	0.772681	0.537399	20.5116	0.0457088	15.8489
0.05	0.06	21.75	1.655	0	Q8N2R8	FAM43A	REVERSED Protein FAM43A	0	0.92045	0.961226	1.72187	0.519996	1.58489	0.990832	0.926539	1.38038	0.717794	1.36773	0.92045	0.965068	1.69044	0.524808	1.55597
0.12	0.17	34.14	4.016	0	Q8N4B1	FAM109A	Sesquipedalian-1	0	0.816582	0.702965	2.0893	0.390841	1.70608	0.847227	0.760324	2.0893	0.405508	1.77011	0.946237	0.931301	2.0893	0.452898	1.97697
0.23	0.26	47.12	8.173	0	Q8N511	TMEM199	REVERSED Transmembrane protein 199	0	1.22462	0.148805	1.18032	1.03753	1.45881	1.14815	0.288639	1.19124	0.963829	1.36773	1.05682	0.47946	1.18032	0.895365	1.25892
0.15	2.36	27.02	6.855	2.016	Q8N5J4	SPIC	REVERSED Transcription factor Spi-C	1	1.59956	0.106164	2.208	0.724436	3.98107	0.642688	0.157338	2.44343	0.212814	1.57036	2.33346	0.0640596	1.51356	1.5417	7.87046
0.24	0.25	33.19	3.93	0	Q8N7C4	TMEM217	Transmembrane protein 217	0	0.564937	0.389688	2.10863	0.270396	1.19124	2.208	0.28884	2.0893	1.05682	4.65586	0.253513	0.178378	2.10863	0.121339	0.534564
0.13	0.14	53.35	1.341	0	Q8N7J2	FAM123A	REVERSED Protein FAM123A	0	0.534564	0.678518	2.33346	0.233346	1.24738	0.597035	0.540115	2.208	0.260615	1.31826	0.824138	0.797936	2.33346	0.343558	1.92309
0.57	0.67	15.64	6.145	3.911	Q8N7M0	TCTEX1D1	REVERSED Tctex1 domain-containing protein 1	1	1.04713	0.908651	2.0893	0.501187	2.18776	2.208	0.289234	2.0893	1.05682	4.61318	0.469894	0.308015	2.10863	0.224906	0.990832
0.05	0.07	16.22	2.102	0	Q8N8Q8	COX18	REVERSED Mitochondrial inner membrane protein COX18	0	1.65959	0.69201	23.1206	0.0717794	25.1189	1.57036	0.719807	19.2309	0.0816582	21.4783	1.04713	0.965338	2.0893	0.501187	2.18776
0.17	0.21	39.52	2.419	0	Q8N9E0	FAM133A	REVERSED Protein FAM133A	0	1.02802	0.98599	10.1859	0.100925	10.4713	1.01859	1	4.2462	0.239883	4.32514	1	0.98599	2.42103	0.413047	2.42103
0.73	0.82	27.25	3.815	1.635	Q8NA23	WDR31	WD repeat-containing protein 31	1	0.698232	0.537618	2.10863	0.334195	1.47231	1.09648	0.842385	2.0893	0.524808	2.29087	0.636796	0.458118	2.0893	0.301995	1.33045
0.05	0.23	43.59	1.974	0	Q8NAB2	KBTBD3	Kelch repeat and BTB domain-containing protein 3	0	4.13048	0.210395	1.27057	3.25087	5.49541	0.436516	0.634994	1.51356	0.246604	0.660694	8.47227	0.174307	1.69044	5.01187	15.5597
0.6	0.63	44.36	1.961	1.961	Q8NC51	SERBP1	Plasminogen activator inhibitor 1 RNA-binding protein	1	0.937562	0.907602	2.0893	0.448745	1.95885	1.02802	0.936489	2.0893	0.49204	2.14783	0.903649	0.846283	2.0893	0.428549	1.88799
0.05	0.08	39.04	6.164	0	Q8NDC4	MORN4	MORN repeat-containing protein 4	0	0.711214	0.553082	2.0893	0.340408	1.48594	0.299226	0.20119	2.0893	0.143219	0.625173	2.35505	0.270245	2.0893	1.1272	4.96592
0.05	0.07	43.72	0	0	Q8NDZ9	YJ017	REVERSED Putative uncharacterized protein LOC439951	0	1.28233	0.62806	2.0893	0.613762	2.67917	1.21339	0.700189	2.0893	0.580764	2.53513	1.04713	0.903909	2.0893	0.501187	2.18776
0.24	0.26	32.41	1.386	0.6932	Q8NEN9	PDZD8	REVERSED PDZ domain-containing protein 8	1	1.02802	0.98599	10.1859	0.100925	10.4713	1.01859	1	4.2462	0.239883	4.32514	1	0.98599	2.42103	0.413047	2.42103
0.06	0.11	32.86	2.143	0	Q8NF86	PRSS33	REVERSED Serine protease 33	0	2.39883	0.264611	2.0893	1.14815	5.05825	1.13763	0.786136	2.0893	0.544503	2.37684	2.0893	0.306161	2.0893	1	4.40555
0.17	0.64	47.15	1.887	0.2501	Q8NF91	SYNE1	Nesprin-1	3	0.801678	0.640067	1.43219	0.510505	1.14815	1.04713	0.695081	1.43219	0.731139	1.52757	0.758578	0.406612	1.43219	0.474242	1.08643
0.17	0.2	40.53	4.527	0	Q8NG06	TRIM58	Tripartite motif-containing protein 58	0	1.20226	0.702961	2.0893	0.57544	2.53513	1.28233	0.63191	2.0893	0.613762	2.67917	0.937562	0.905892	2.0893	0.448745	1.95885
0.08	0.17	13.59	3.56	0	Q8NGE1	OR6C4	REVERSED Olfactory receptor 6C4	0	3.40408	0.195051	2.0893	1.6293	7.17794	1.59956	0.436685	2.10863	0.758578	3.34195	2.10863	0.303075	2.0893	1.00925	4.44631
0.1	0.24	35.02	5.047	0	Q8NHW5	RPLP0P6	60S acidic ribosomal protein P0-like	0	0.824138	0.858477	1.47231	0.501187	1.21339	0.608135	0.73991	1.51356	0.251189	0.92045	1.39316	0.870137	1.57036	0.887156	2.77971
1.23	1.24	38.51	4.255	3.191	Q8NI99	ANGPTL6	Angiopoietin-related protein 6	1	0.772681	0.644697	2.10863	0.369828	1.6293	1.99526	0.323523	2.0893	0.954993	4.20727	0.383707	0.249489	2.10863	0.183654	0.809096
0.07	0.15	19.39	5.455	0	Q8TAE6	PPP1R14C	REVERSED Protein phosphatase 1 regulatory subunit 14C	0	1.55597	0.458021	2.10863	0.737904	3.25087	1.58489	0.441262	2.0893	0.758578	3.31131	0.963829	0.960254	2.0893	0.461318	2.01372
0.05	0.09	40.59	2.748	0	Q8TBK2	SETD6	N-lysine methyltransferase SETD6	0	2.0893	0.00334372	3.0761	0.679204	5.86138	3.34195	0.00304721	3.40408	0.981748	9.37562	0.648634	0.496645	2.48886	0.229087	1.61436
0.09	0.1	26.04	4.167	0	Q8TBK6	ZCCHC10	Zinc finger CCHC domain-containing protein 10	0	1.00925	0.9771	1.95885	0.515229	1.75388	1.41906	0.795681	1.27057	1.11686	5.86138	0.698232	0.816528	1.77011	0.195884	1.23595
0.06	0.68	37.87	2.72	1.255	Q8TC44	POC1B	POC1 centriolar protein homolog B	1	1.00925	0.971903	2.0893	0.483059	2.10863	0.496592	0.326493	2.0893	0.235505	1.03753	2.01372	0.31985	2.0893	0.963829	4.2462
0.06	0.68	37.87	2.72	1.255	Q8TC44	POC1B	POC1 centriolar protein homolog B	1	1.00925	0.971903	2.0893	0.483059	2.10863	0.496592	0.326493	2.0893	0.235505	1.03753	2.01372	0.31985	2.0893	0.963829	4.2462
0.12	0.17	50.36	1.456	0	Q8TD16	BICD2	REVERSED Protein bicaudal D homolog 2	0	0.539511	0.721458	1.5417	0.135519	0.831764	0.772681	0.857379	1.20226	0.534564	0.928966	0.691831	0.850098	1.43219	0.188799	0.990832
0.08	0.1	30.61	1.636	0	Q8TEQ0	SNX29	REVERSED Sorting nexin-29	0	3.28095	0.216146	29.6483	0.110662	36.3078	1.95885	0.377614	23.3346	0.083946	26.7917	1.67494	0.406354	2.10863	0.794328	3.49945
0.12	0.31	33.65	3.145	0	Q8WVY7	UBLCP1	REVERSED Ubiquitin-like domain-containing CTD phosphatase 1	0	0.586138	0.392606	6.85488	0.0855067	4.01791	0.847227	0.751266	19.9526	0.0483059	16.9044	0.679204	0.500427	4.44631	0.152757	3.01995
0.07	0.07	55.17	0	0	Q8WXF0	SRSF12	Serine/arginine-rich splicing factor 12	0	0.277971	0.189075	2.51189	0.017378	0.698232	0.77983	0.882663	2.01372	0.356451	1.57036	0.334195	0.214874	2.80543	0.0231206	0.937562
0.06	0.07	43.92	4.054	0	Q8WYT3	C14orf184	REVERSED Putative uncharacterized protein C14orf184	0	1.04713	0.911123	2.0893	0.501187	2.18776	1.99526	0.326283	2.10863	0.946237	4.16869	0.519996	0.34916	2.10863	0.248886	1.09648
0.13	0.19	18.21	3.78	0	Q8WZ04	LRTOMT	REVERSED Transmembrane O-methyltransferase	0	0.679204	0.50318	5.01187	0.135519	3.40408	0.787046	0.68667	2.0893	0.376704	1.64437	0.855067	0.728757	8.3946	0.101859	7.17794
0.73	0.75	67.65	7.353	7.353	Q8WZB0	C9orf130	REVERSED Putative uncharacterized protein C9orf130	1	0.816582	0.885555	1.20226	0.597035	0.981748	0.619441	0.7594	1.2942	0.319154	0.801678	1.30617	0.865004	1.24738	1.04713	2.14783
0.14	0.97	21.41	3.311	0.883	Q92484	SMPDL3A	REVERSED Acid sphingomyelinase-like phosphodiesterase 3a	1	42.0727	0.101431	3.22107	13.0617	88.7156	24.8886	0.147498	4.16869	5.97035	75.8578	2.42103	0.297146	1.34276	1.80302	3.31131
0.12	0.14	41.48	1.647	0.6365	Q92616	GCN1L1	Translational activator GCN1	2	0.246604	0.0879891	5.05825	0.0127057	1.24738	0.199526	0.0949692	5.97035	0.021677	1.19124	1.1695	0.904671	5.10505	0.229087	7.11213
0.09	0.23	33.53	3.293	0	Q92905	COPS5	REVERSED COP9 signalosome complex subunit 5	0	1.5417	0.318238	2.01372	0.765597	3.40408	1.99526	0.261339	2.12814	0.937562	5.01187	0.787046	0.722062	2.01372	0.322107	1.58489
0.08	0.1	29.25	4.717	0	Q969Q0	RPL36AL	REVERSED 60S ribosomal protein L36a-like	0	0.981748	0.991729	2.0893	0.469894	2.05116	0.666807	0.493432	2.0893	0.316228	1.39316	1.47231	0.497509	2.0893	0.704693	3.0761
0.27	0.37	35.43	16.54	0	Q96A08	HIST1H2BA	Histone H2B type 1-A	0	1.0666	0.881122	2.0893	0.510505	2.22844	1.34276	0.581814	2.0893	0.642688	2.80543	0.787046	0.66436	2.0893	0.376704	1.64437
0.1	0.13	42.12	2.198	0	Q96A44	SPSB4	REVERSED SPRY domain-containing SOCS box protein 4	0	0.801678	0.681513	2.0893	0.383707	1.67494	0.751623	0.607475	2.0893	0.359749	1.57036	1.05682	0.897699	2.0893	0.505825	2.208
0.1	0.27	28.07	4.278	0	Q96CD0	FBXL8	REVERSED F-box/LRR-repeat protein 8	0	9.54993	0.461513	2.39883	3.98107	21.677	10.3753	0.451512	2.39883	4.32514	23.5505	0.879022	0.976851	1.92309	0.452898	1.69044
0.32	2.75	39.54	5.977	1.149	Q96CW1	AP2M1	REVERSED AP-2 complex subunit mu	1	0.501187	0.331738	2.0893	0.237684	1.04713	1.10662	0.875519	2.12814	0.519996	2.35505	0.448745	0.30297	2.0893	0.214783	0.937562
0.48	2.17	47.76	7.463	1.791	Q96DD0	LRRC39	Leucine-rich repeat-containing protein 39	1	15.417	0.223312	2.93765	5.24808	31.0456	18.5353	0.210493	3.16228	5.86138	36.6438	0.83946	0.886323	1.23595	0.666807	1.03753
0.09	0.09	20	2.927	0	Q96DR4	STARD4	REVERSED StAR-related lipid transfer protein 4	0	0.660694	0.48849	2.0893	0.313329	1.38038	0.862979	0.787024	2.0893	0.413047	1.80302	0.758578	0.615828	2.0893	0.359749	1.58489
0.08	0.11	40.53	7.93	0	Q96E35	ZMYND19	REVERSED Zinc finger MYND domain-containing protein 19	0	11.1686	0.105579	1.61436	6.91831	18.197	12.2462	0.10163	1.39316	8.79023	17.2187	0.903649	0.852223	1.44544	0.625173	1.30617
0.06	0.87	33.12	1.592	1.592	Q96EK4	THAP11	THAP domain-containing protein 11	1	0.895365	0.837773	2.0893	0.428549	1.87068	0.744732	0.59419	2.0893	0.353183	1.55597	1.19124	0.715052	2.0893	0.570164	2.48886
0.05	0.45	37.34	5.063	1.055	Q96ER3	SAAL1	REVERSED Protein SAAL1	1	0.92045	0.963045	3.25087	0.283139	2.99226	1.20226	0.679252	2.0893	0.57544	2.51189	0.758578	0.651576	2.55859	0.299226	1.94089
0.08	0.09	27.64	1.994	0	Q96EY9	ADAT3	REVERSED tRNA-specific adenosine deaminase-like protein 3	0	1.25892	0.646502	2.0893	0.60256	2.65461	1.69044	0.402243	2.0893	0.809096	3.56451	0.737904	0.592029	2.10863	0.353183	1.55597
0.09	0.09	26.2	4.153	0	Q96EZ4	MYEOV	Myeloma-overexpressed gene protein	0	0.92045	0.924693	2.0893	0.440555	1.92309	0.794328	0.644265	2.48886	0.319154	1.97697	1.14815	0.701574	4.83059	0.237684	5.54626
0.06	0.44	28.92	5.575	0	Q96F24	NRBF2	Nuclear receptor-binding factor 2	0	1.30617	0.105833	2.24905	0.580764	2.96483	0.469894	0.317206	1.30617	0.111686	0.613762	2.39883	0.0400195	2.37684	1.00925	8.70964
0.05	0.1	38.58	1.312	0	Q96FG2	ELMOD3	REVERSED ELMO domain-containing protein 3	0	5.64937	0.140469	2.0893	2.70396	11.9124	3.63078	0.185827	2.0893	1.7378	7.65597	1.5417	0.461112	2.0893	0.737904	3.22107
0.09	0.75	19.5	3.67	1.147	Q96FJ0	STAMBPL1	REVERSED AMSH-like protease	1	0.903649	0.847557	2.0893	0.432514	1.88799	1.51356	0.476022	2.0893	0.724436	3.16228	0.591562	0.412171	2.0893	0.280543	1.23595
0.08	0.18	41.12	3.738	0	Q96FV0	LRRC46	REVERSED Leucine-rich repeat-containing protein 46	0	0.816582	0.935812	2.03236	0.37325	1.65959	0.862979	0.869527	1.24738	0.691831	1.07647	0.937562	0.932331	1.80302	0.496592	1.69044
0.16	0.17	24.8	2.426	0	Q96H96	COQ2	4-hydroxybenzoate polyprenyltransferase, mitochondrial	0	0.244343	0.23686	2.07014	0.11695	0.505825	0.251189	0.269392	1.72187	0.0666807	0.432514	1.02802	0.790125	1.45881	0.704693	1.88799
0.1	0.11	42.27	1.329	0	Q96JB2	COG3	REVERSED Conserved oligomeric Golgi complex subunit 3	0	0.0394457	0.207169	2.12814	0.0239883	0.083946	0.220801	0.262042	1.58489	0.107647	0.349945	0.0529663	0.622873	3.28095	0.0218776	0.17378
0.12	0.15	45.37	1.455	0	Q96JB6	LOXL4	REVERSED Lysyl oxidase homolog 4	0	1.11686	0.864088	1.38038	0.809096	1.5417	1.34276	0.674377	1.44544	0.928966	1.94089	0.824138	0.788781	1.38038	0.597035	1.13763
0.05	0.12	50.17	1.338	0	Q96KX2	CAPZA3	F-actin-capping protein subunit alpha-3	0	1.18032	0.749794	1.38038	0.855067	1.6293	1.0666	0.882341	1.38038	0.772681	1.47231	1.09648	0.857507	1.38038	0.794328	1.51356
0.05	2.11	36.6	3.327	0.9242	Q96L92	SNX27	REVERSED Sorting nexin-27	1	0.483059	0.333379	5.80764	0.083946	2.80543	0.946237	0.933128	2.0893	0.452898	1.97697	0.505825	0.350961	2.99226	0.170608	1.51356
0.06	0.1	48.59	3.135	0	Q96LL4	C8orf48	Uncharacterized protein C8orf48	0	1.24738	0.620115	20.7014	0.060256	21.2814	1.31826	0.608731	2.0893	0.630957	2.75423	0.937562	0.983159	19.2309	0.0510505	18.0302
0.06	0.26	21.83	3.742	1.04	Q96LT7	C9orf72	Uncharacterized protein C9orf72	1	0.121339	0.351468	5.10505	0.0346737	0.619441	0.559758	0.611002	2.31206	0.197697	1.2942	0.20893	0.525487	4.32514	0.0519996	0.903649
0.05	1.48	58.37	3.696	0.9728	Q96M91	CCDC11	REVERSED Coiled-coil domain-containing protein 11	1	0.809096	0.696859	2.0893	0.387258	1.69044	1.03753	0.931201	2.0893	0.496592	2.1677	0.772681	0.644728	2.10863	0.369828	1.6293
0.31	0.36	44.41	1.813	0	Q96MG2	JSRP1	Junctional sarcoplasmic reticulum protein 1	0	1.30617	0.568446	1.38038	0.946237	1.80302	1.15878	0.817981	2.1677	0.534564	2.51189	1.11686	0.699155	2.44343	0.457088	2.72898
0.17	2.34	44.08	4.276	1.645	Q96MG7	NDNL2	REVERSED Melanoma-associated antigen G1	1	0.855067	0.788256	1.40605	0.608135	1.20226	0.887156	0.832682	1.25892	0.704693	1.11686	0.946237	0.95146	1.24738	0.758578	1.18032
0.08	0.81	22.45	4.082	1.276	Q96QZ0	PANX3	Pannexin-3	1	20.3236	0.0299199	32.5087	0.625173	77.2681	23.7684	0.0827397	33.1131	0.717794	80.9096	4.32514	0.11111	31.0456	0.139316	44.8745
0.05	0.27	48.29	3.767	0	Q99614	TTC1	REVERSED Tetratricopeptide repeat protein 1	0	1.11686	0.956455	1.7378	0.642688	2.01372	1.77011	0.898194	1.64437	1.07647	5.34564	0.619441	0.856201	1.80302	0.246604	1.11686
0.99	1.26	38.56	4.948	2.268	Q99784	OLFM1	Noelin	1	1.10662	0.820254	2.0893	0.529663	2.31206	1.28233	0.629837	2.0893	0.613762	2.67917	0.855067	0.775993	2.0893	0.409261	1.78649
0.47	0.58	36.1	3.325	1.9	Q9BPX7	C7orf25	REVERSED UPF0415 protein C7orf25	1	3.94457	0.349235	2.88403	1.36773	36.9828	1.87068	0.506214	2.53513	0.737904	12.5892	2.26987	0.63057	2.18776	1.03753	7.24436
0.19	0.32	29.82	4.128	0	Q9BT43	POLR3GL	DNA-directed RNA polymerase III subunit RPC7-like	0	0.972747	0.888471	2.1677	0.448745	2.10863	1.03753	0.963139	2.0893	0.496592	2.1677	0.937562	0.853079	2.0893	0.444631	1.95885
0.05	0.06	32.09	3.721	0	Q9BTP7	FAAP24	REVERSED Fanconi anemia-associated protein of 24 kDa	0	1.40605	0.533239	2.0893	0.672977	2.93765	0.92045	0.882728	2.0893	0.440555	1.92309	1.51356	0.473478	2.0893	0.724436	3.16228
0.16	0.25	23.33	4.615	0	Q9BTY7	FAM203A	REVERSED Protein FAM203A	0	1.15878	0.868794	1.6293	0.711214	1.92309	0.855067	0.96271	1.45881	0.549541	1.24738	1.34276	0.833477	1.67494	0.801678	2.33346
0.05	0.05	70	0	0	Q9BUV0	C1orf63	REVERSED UPF0471 protein C1orf63	0	0.92045	0.894352	1.38038	0.666807	1.27057	1.09648	0.821142	1.52757	0.717794	1.67494	0.831764	0.727594	2.07014	0.401791	1.72187
0.11	0.13	37.4	6.775	0	Q9BV20	MRI1	REVERSED Methylthioribose-1-phosphate isomerase	0	2.58226	0.247962	2.10863	1.22462	5.39511	0.474242	0.310976	2.0893	0.226986	0.990832	5.39511	0.144882	2.10863	2.55859	11.272
0.06	0.19	30.05	3.941	0	Q9BVM2	DPCD	REVERSED Protein DPCD	0	0.534564	0.364152	2.12814	0.251189	1.13763	0.654636	0.483122	2.31206	0.283139	1.51356	0.809096	0.705455	4.92039	0.164437	3.98107
0.05	0.12	68.46	2.965	0	Q9BWT1	CDCA7	Cell division cycle-associated protein 7	0	0.0149968	0.0570894	9.63829	0.0100925	0.144544	0.0394457	0.0774937	2.10863	0.0187068	0.0831764	0.277971	0.208271	16.293	0.0277971	4.52898
0.19	0.21	41.55	1.351	1.351	Q9BWV7	TTLL2	REVERSED Probable tubulin polyglutamylase TTLL2	1	1.5417	0.464501	1.38038	1.11686	2.12814	1.41906	0.533994	1.38038	1.02802	1.95885	1.08643	0.862313	1.38038	0.787046	1.49969
0.1	0.18	39.48	5.195	0	Q9BX40	LSM14B	REVERSED Protein LSM14 homolog B	0	0.591562	0.558519	2.03236	0.133045	1.20226	1	0.196143	1.95885	0.510505	2.83139	0.698232	0.259972	2.18776	0.11272	1.52757
0.18	0.2	21.98	1.858	0	Q9BXS4	TMEM59	REVERSED Transmembrane protein 59	0	1.13763	0.778104	2.0893	0.544503	2.37684	1.05682	0.897228	2.0893	0.505825	2.208	1.07647	0.874005	2.10863	0.510505	2.24905
0.06	0.09	30.98	1.053	0	Q9BY84	DUSP16	REVERSED Dual specificity protein phosphatase 16	0	0.809096	0.566889	1.35519	0.554626	1.09648	1.22462	0.333848	1.24738	0.981748	1.7378	0.642688	0.526642	1.24738	0.461318	0.801678
0.06	0.11	42.34	2.016	0	Q9BYG7	MRO	REVERSED Protein maestro	0	0.711214	0.649523	1.59956	0.387258	1.13763	0.787046	0.84287	1.27057	0.591562	1	0.887156	0.778957	1.8197	0.461318	1.61436
0.19	0.21	35.2	1.189	0.7134	Q9BYV9	BACH2	REVERSED Transcription regulator protein BACH2	1	10.666	0.65619	2.63027	4.05509	23.7684	10.666	0.600313	2.70396	3.94457	23.7684	0.981748	0.411515	1.27057	0.772681	1.24738
0.05	0.11	42.03	1.159	0	Q9BZ19	ANKRD60	Ankyrin repeat domain-containing protein 60	0	1.1272	0.804076	2.10863	0.534564	2.35505	0.954993	0.942427	2.0893	0.457088	1.99526	1.15878	0.753089	2.0893	0.554626	2.42103
0.1	0.13	26.09	1.902	0	Q9BZJ7	GPR62	REVERSED Probable G-protein coupled receptor 62	0	0.981748	0.982625	2.0893	0.469894	2.05116	1.00925	0.972076	2.0893	0.483059	2.10863	0.963829	0.954755	2.0893	0.461318	2.01372
0.06	0.26	42.92	5.568	0	Q9BZS1	FOXP3	Forkhead box protein P3	0	0.349945	0.459327	2.51189	0.0824138	0.879022	0.724436	0.71664	1.70608	0.376704	1.23595	0.461318	0.62876	2.80543	0.123595	1.2942
0.08	0.09	35.4	1.4	0	Q9C037	TRIM4	Tripartite motif-containing protein 4	0	0.487529	0.321028	2.0893	0.231207	1.01859	2.26987	0.28038	2.0893	1.08643	4.7863	0.212814	0.158474	2.0893	0.100925	0.444631
0.22	0.24	38.22	1.556	0.6667	Q9C0I3	FAM190A	Protein FAM190A	1	0.731139	0.0412161	3.0761	0.233346	2.24905	1.0666	0.068595	3.28095	0.325087	3.46737	0.679204	0.0187661	2.31206	0.291072	1.57036
0.05	0.11	37.36	3.962	0	Q9C0I9	LRRC27	REVERSED Leucine-rich repeat-containing protein 27	0	0.912011	0.874171	2.10863	0.436516	1.92309	1.1695	0.744126	2.0893	0.559758	2.44343	0.772681	0.644233	2.10863	0.369828	1.6293
0.14	0.36	35.23	2.841	0	Q9H0R6	QRSL1	REVERSED Glutamyl-tRNA(Gln) amidotransferase subunit A homolog	0	1.0666	0.881122	2.0893	0.510505	2.22844	1.34276	0.581814	2.0893	0.642688	2.80543	0.787046	0.66436	2.0893	0.376704	1.64437
0.11	0.11	52.53	6.061	0	Q9H1M4	DEFB127	REVERSED Beta-defensin 127	0	4.44631	0.304509	2.18776	2.03236	28.3139	6.48634	0.235158	2.31206	2.80543	29.3765	0.679204	0.631181	1.2942	0.515229	0.879022
0.25	2.31	25.07	3.662	1.408	Q9H1Z9	TSPAN10	REVERSED Tetraspanin-10	1	0.824138	0.675383	2.96483	0.277971	2.44343	0.809096	0.995871	20.5116	0.0465586	16.5959	1.00925	0.672247	19.0546	0.0529663	18.8799
0.45	0.52	24.26	4.894	1.277	Q9H295	TM7SF4	Transmembrane 7 superfamily member 4	1	1.78649	0.373422	2.10863	0.847227	3.7325	0.343558	0.225105	2.0893	0.16293	0.717794	5.15229	0.148332	2.0893	2.46604	10.8643
0.19	0.2	40.2	1.173	0	Q9H2C0	GAN	Gigaxonin	0	0.724436	0.309222	2.72898	0.265461	1.97697	1.04713	0.441775	2.72898	0.383707	2.85759	0.679204	0.614498	1.24738	0.549541	0.847227
0.05	0.07	62.62	1.558	0	Q9H2L5	RASSF4	REVERSED Ras association domain-containing protein 4	0	0.912011	0.862537	2.0893	0.436516	1.90546	1.69044	0.403228	2.0893	0.809096	3.53183	0.534564	0.359015	2.0893	0.253513	1.11686
0.35	0.42	18.93	3.571	0	Q9H3N1	TMX1	Thioredoxin-related transmembrane protein 1	0	0.990832	1	2.0893	0.474242	2.07014	50.1187	0.0214705	2.75423	18.197	96.3829	0.0136773	0.0214705	3.49945	0.01	0.047863
0.11	1.14	56.54	7.761	4.656	Q9H4B7	TUBB1	Tubulin beta-1 chain	2	0.937562	0.955511	1.47231	0.636796	1.38038	0.912011	0.923161	1.44544	0.630957	1.31826	1.01859	0.879677	1.55597	0.654636	1.58489
0.22	0.25	63.64	14.29	0	Q9H4G4	GLIPR2	Golgi-associated plant pathogenesis-related protein 1	0	1.25892	0.647008	2.0893	0.60256	2.65461	0.981748	0.988399	2.0893	0.469894	2.05116	1.27057	0.63869	2.0893	0.608135	2.65461
0.1	0.52	38.11	4.098	0	Q9H8H3	METTL7A	REVERSED Methyltransferase-like protein 7A	0	0.0113763	0.0527467	2.29087	0.01	0.0260615	0.0310456	0.0785138	1.65959	0.0157036	0.0515229	0.0452898	0.156918	6.42688	0.0100925	0.291072
0.08	0.11	39.62	1.917	0	Q9H967	WDR76	REVERSED WD repeat-containing protein 76	0	0.737904	0.881507	1.23595	0.549541	0.912011	0.887156	0.979827	1.23595	0.648634	1.09648	0.831764	0.901102	1.21339	0.679204	1.00925
0.05	2.08	35.45	1.803	0.6009	Q9HC10	OTOF	Otoferlin	2	0.666807	0.415701	21.8776	0.0416869	14.5881	0.937562	0.794339	7.51623	0.124738	7.04693	0.691831	0.50886	4.28548	0.161436	2.96483
0.06	0.09	18.85	1.984	0	Q9HCP6	HHATL	REVERSED Protein-cysteine N-palmitoyltransferase HHAT-like protein	0	0.946237	0.931571	2.0893	0.452898	1.97697	1.30617	0.60536	2.0893	0.625173	2.75423	0.717794	0.562127	2.0893	0.343558	1.49969
0.12	0.14	48.19	2.456	0.8187	Q9HCS7	XAB2	Pre-mRNA-splicing factor SYF1	1	1.38038	0.328881	1.7378	0.794328	2.39883	0.963829	0.730906	2.18776	0.440555	2.10863	1.41906	0.270495	2.01372	0.704693	2.85759
0.08	0.14	39.93	2.359	0	Q9NP74	PALMD	Palmdelphin	0	1.2942	1	1.67494	0.772681	2.1677	0.737904	1	1.7378	0.420727	1.28233	99.0832	1	1	99.0832	99.0832
0.06	0.08	37.98	3.069	0	Q9NP80	PNPLA8	Calcium-independent phospholipase A2-gamma	0	0.698232	0.727915	1.28233	0.444631	0.895365	0.544503	0.548019	1.28233	0.283139	0.698232	1.2942	0.755563	1.39316	0.928966	1.97697
0.33	0.35	36.46	1.042	1.042	Q9NPB8	GPCPD1	REVERSED Putative glycerophosphocholine phosphodiesterase GPCPD1	1	0.660694	0.762327	1.40605	0.416869	0.928966	0.946237	0.928417	1.31826	0.744732	1.24738	0.691831	0.826913	1.40605	0.390841	0.972747
0.22	0.29	40.64	1.872	0	Q9NPI8	FANCF	Fanconi anemia group F protein	0	2.26987	0.281883	2.10863	1.07647	4.74242	1.94089	0.335594	2.0893	0.928966	4.05509	1.15878	0.762739	2.10863	0.549541	2.42103
0.26	0.35	31.55	4.813	0	Q9NPI8	FANCF	REVERSED Fanconi anemia group F protein	0	2.26987	0.281883	2.0893	1.08643	4.74242	1.94089	0.335594	2.0893	0.928966	4.05509	1.15878	0.762739	2.0893	0.554626	2.42103
0.07	0.5	58.52	2.273	0	Q9NQ39	RPS10P5	Putative 40S ribosomal protein S10-like	0	11.1686	0.102093	2.10863	5.29664	23.3346	11.0662	0.102508	2.10863	5.24808	23.1206	1	0.9838	2.0893	0.47863	2.0893
0.21	0.26	39.04	2.41	0	Q9NRD5	PICK1	PRKCA-binding protein	0	0.394457	0.255216	2.0893	0.187068	0.824138	0.398107	0.257258	2.0893	0.188799	0.831764	0.981748	0.986697	2.0893	0.469894	2.05116
0.05	0.16	40.57	6.286	0	Q9NRX2	MRPL17	39S ribosomal protein L17, mitochondrial	0	0.887156	0.786915	2.58226	0.343558	2.29087	0.937562	0.898851	2.75423	0.340408	2.58226	0.937562	0.881965	2.0893	0.448745	1.95885
0.05	0.25	38.99	3.232	0	Q9NS91	RAD18	REVERSED E3 ubiquitin-protein ligase RAD18	0	0.0366438	0.886833	1.6293	0.0222843	0.0597035	0.197697	0.529429	1.48594	0.110662	0.293765	0.0608135	0.472245	1.88799	0.0285759	0.114815
0.5	0.52	50.73	1.825	1.825	Q9NSE7	ABCC13	REVERSED Putative ATP-binding cassette sub-family C member 13	1	0.483059	0.543068	1.67494	0.16293	0.809096	0.474242	0.612085	1.65959	0.248886	0.787046	0.937562	0.889609	1.5417	0.432514	1.44544
0.06	0.4	33.51	2.949	0	Q9NSI8	SAMSN1	SAM domain-containing protein SAMSN-1	0	1.10662	0.840126	1.95885	0.564937	2.1677	1.21339	0.486296	1.61436	0.751623	1.95885	0.903649	0.417298	2.53513	0.356451	2.29087
0.06	0.4	33.51	2.949	0	Q9NSI8	SAMSN1	SAM domain-containing protein SAMSN-1	0	1.10662	0.840126	1.95885	0.564937	2.1677	1.21339	0.486296	1.61436	0.751623	1.95885	0.903649	0.417298	2.53513	0.356451	2.29087
0.05	0.28	57.89	3.684	0	Q9NUL3	STAU2	Double-stranded RNA-binding protein Staufen homolog 2	0	0.619441	0.399657	19.4089	0.0448745	12.0226	0.946237	0.920466	4.01791	0.235505	3.80189	0.642688	0.428968	5.19996	0.123595	3.34195
0.2	0.23	32.79	2.717	0	Q9NUV7	SPTLC3	Serine palmitoyltransferase 3	0	1.27057	0.63836	2.0893	0.608135	2.65461	1.30617	0.604108	2.0893	0.625173	2.72898	0.963829	0.950133	2.0893	0.461318	2.01372
0.22	0.37	63	6.593	0	Q9NWB6	ARGLU1	REVERSED Arginine and glutamate-rich protein 1	0	0.586138	0.405692	2.0893	0.277971	1.22462	0.981748	0.978696	2.0893	0.469894	2.05116	0.591562	0.413359	2.0893	0.283139	1.23595
0.05	0.29	31.71	2.546	0	Q9NWQ8	PAG1	REVERSED Phosphoprotein associated with glycosphingolipid-enriched microdomains 1	0	2.24905	0.279527	6.19441	0.363078	13.9316	2.44343	0.248931	16.7494	0.145881	26.3027	0.903649	0.816492	2.67917	0.337287	2.42103
0.3	0.41	27.72	4.243	1.132	Q9NX78	C14orf101	UPF0679 protein C14orf101	1	0.903649	0.869742	3.53183	0.255859	3.19154	1.14815	0.774997	2.0893	0.549541	2.39883	0.77983	0.667103	2.93765	0.267917	2.29087
0.08	0.09	24.33	2.667	0	Q9NZC4	EHF	REVERSED ETS homologous factor	0	1.18032	0.739669	2.05116	0.57544	2.42103	0.870964	0.832232	1.7378	0.501187	1.51356	1.34276	0.609851	1.39316	0.963829	1.87068
0.06	0.18	52.15	2.454	0	Q9P0M2	AKAP7	REVERSED A-kinase anchor protein 7 isoform gamma	0	0.954993	0.901379	2.80543	0.337287	2.67917	0.937562	0.877187	3.83707	0.244343	3.59749	1	0.975071	2.0893	0.47863	2.0893
0.06	2.1	41.01	7.194	3.597	Q9P0R6	GSKIP	GSK3-beta interaction protein	1	1.6293	0.427301	2.10863	0.772681	3.40408	3.53183	0.190334	2.10863	1.67494	7.37904	0.457088	0.297038	2.0893	0.21677	0.954993
0.19	0.21	46.72	4.803	0	Q9P126	CLEC1B	REVERSED C-type lectin domain family 1 member B	0	0.772681	0.644697	2.10863	0.369828	1.6293	1.99526	0.323523	2.0893	0.954993	4.20727	0.383707	0.249489	2.10863	0.183654	0.809096
0.06	0.19	37.83	3.043	0	Q9P2S5	WRAP73	WD repeat-containing protein WRAP73	0	0.92045	0.887716	1.18032	0.77983	1.08643	0.794328	0.726603	1.38038	0.57544	1.09648	1.14815	0.826357	1.31826	0.870964	1.51356
0.23	0.36	50.58	4.913	0	Q9UBE0	SAE1	SUMO-activating enzyme subunit 1	0	0.870964	0.919449	1.43219	0.539511	1.24738	1.44544	0.695124	1.33045	1.08643	2.44343	0.597035	0.634673	1.40605	0.296483	0.83946
0.05	0.05	26.73	2.31	0	Q9UBR2	CTSZ	Cathepsin Z	0	0.666807	0.340609	1.61436	0.224906	1.07647	0.758578	0.668052	1.6293	0.376704	1.23595	0.824138	0.466053	1.55597	0.363078	1.28233
0.08	0.48	47.06	7.059	0	Q9UDW3	ZMAT5	REVERSED Zinc finger matrin-type protein 5	0	1.41906	0.529983	2.10863	0.672977	2.96483	2.07014	0.309928	2.0893	0.990832	4.36516	0.672977	0.506688	2.10863	0.322107	1.41906
0.08	0.09	37.86	2.881	0	Q9UF11	PLEKHB1	REVERSED Pleckstrin homology domain-containing family B member 1	0	0.672977	0.506224	2.0893	0.322107	1.40605	0.92045	0.877231	2.0893	0.440555	1.92309	0.731139	0.576169	2.0893	0.346737	1.52757
0.71	3.01	38.94	6.785	4.13	Q9UH36	SRRD	SRR1-like protein	2	0.366438	0.501937	2.03236	0.161436	0.744732	1.11686	0.888661	1.44544	0.772681	1.64437	0.325087	0.45006	2.07014	0.141906	0.672977
0.05	0.54	33.43	2.108	0	Q9UHD1	CHORDC1	REVERSED Cysteine and histidine-rich domain-containing protein 1	0	0.972747	0.824851	1.65959	0.586138	1.61436	0.92045	0.858554	1.38038	0.666807	1.27057	1.05682	0.964152	1.64437	0.642688	1.7378
0.5	0.52	23.71	2.452	2.452	Q9UIJ5	ZDHHC2	REVERSED Palmitoyltransferase ZDHHC2	1	0.870964	0.798836	2.0893	0.416869	1.8197	1.04713	0.904885	2.0893	0.501187	2.18776	0.824138	0.71641	2.0893	0.394457	1.72187
0.13	0.17	47.66	2.083	0	Q9UIL4	KIF25	Kinesin-like protein KIF25	0	0.539511	0.528276	1.92309	0.222843	1.03753	0.77983	0.764315	2.29087	0.328095	1.78649	0.679204	0.691338	1.31826	0.444631	0.895365
0.13	0.16	38.97	1.719	0	Q9UIM3	FKBPL	FK506-binding protein-like	0	1.52757	0.470896	2.10863	0.724436	3.19154	0.751623	0.607859	2.0893	0.359749	1.57036	2.01372	0.32227	2.10863	0.954993	4.20727
0.05	0.06	33.97	5.128	0	Q9UJQ7	C20orf79	REVERSED Uncharacterized protein C20orf79	0	0.487529	0.319333	2.0893	0.231207	1.01859	0.544503	0.369281	2.10863	0.260615	1.14815	0.879022	0.815969	2.10863	0.420727	1.85353
0.07	0.15	29.7	4.62	0	Q9UKJ1	PILRA	REVERSED Paired immunoglobulin-like type 2 receptor alpha	0	3.25087	0.202576	2.0893	1.55597	6.79204	1.94089	0.337206	2.10863	0.92045	4.05509	1.65959	0.410924	2.0893	0.794328	3.49945
0.08	0.12	21.71	2.7	0	Q9UL51	HCN2	REVERSED Potassium/sodium hyperpolarization-activated cyclic nucleotide-gated channel 2	0	0.946237	0.923703	2.0893	0.452898	1.97697	0.660694	0.488032	2.0893	0.316228	1.38038	1.41906	0.527235	2.0893	0.679204	2.96483
0.08	0.12	21.71	2.7	0	Q9UL51	HCN2	REVERSED Potassium/sodium hyperpolarization-activated cyclic nucleotide-gated channel 2	0	0.946237	0.923703	2.0893	0.452898	1.97697	0.660694	0.488032	2.0893	0.316228	1.38038	1.41906	0.527235	2.0893	0.679204	2.96483
0.06	0.12	16.14	4.822	0	Q9ULS6	KCNS2	REVERSED Potassium voltage-gated channel subfamily S member 2	0	1.30617	0.517463	1.38038	0.946237	1.80302	1.33045	0.503095	2.12814	0.625173	2.83139	0.972747	0.972176	1.85353	0.524808	1.80302
0.09	0.12	28.74	3.15	0	Q9UMS0	NFU1	REVERSED NFU1 iron-sulfur cluster scaffold homolog, mitochondrial	0	21.0863	0.0746176	30.761	0.685488	77.983	19.9526	0.0763284	26.7917	0.744732	75.8578	1.05682	0.879161	2.0893	0.505825	2.208
0.19	0.2	45.5	1.929	0	Q9UN79	SOX13	Transcription factor SOX-13	0	2.26987	0.281883	2.10863	1.07647	4.74242	1.94089	0.335594	2.0893	0.928966	4.05509	1.15878	0.762739	2.10863	0.549541	2.42103
0.06	0.12	47.85	0	0	Q9UNE7	STUB1	REVERSED E3 ubiquitin-protein ligase CHIP	0	0.731139	0.581398	2.0893	0.349945	1.52757	0.92045	0.881554	2.0893	0.440555	1.92309	0.787046	0.663531	2.0893	0.376704	1.64437
0.18	0.35	40.83	2.326	0	Q9UNH6	SNX7	REVERSED Sorting nexin-7	0	0.847227	0.760143	2.0893	0.405508	1.77011	1.34276	0.58186	2.0893	0.642688	2.80543	0.625173	0.451122	2.10863	0.299226	1.31826
0.05	0.18	42.47	5.021	0	Q9UQM7	CAMK2A	REVERSED Calcium/calmodulin-dependent protein kinase type II subunit alpha	0	1.07647	0.86428	14.7231	0.0731139	14.8594	1.13763	0.68374	2.0893	0.544503	2.37684	0.937562	0.799579	14.8594	0.0654636	13.9316
0.06	0.09	30.87	2.852	0	Q9Y250	LZTS1	REVERSED Leucine zipper putative tumor suppressor 1	0	1.14815	0.739697	2.29087	0.501187	2.85759	3.19154	0.249886	3.40408	0.937562	13.0617	0.319154	0.345924	3.40408	0.0895365	1.08643
0.05	0.05	26.84	1.025	0	Q9Y2K5	R3HDM2	R3H domain-containing protein 2	0	1.22462	0.617711	1.35519	0.903649	1.65959	0.963829	0.934959	1.18032	0.816582	1.13763	1.25892	0.575371	1.36773	0.92045	1.72187
0.13	0.14	35.06	1.454	0	Q9Y2P4	SLC27A6	REVERSED Long-chain fatty acid transport protein 6	0	0.660694	0.577492	1.7378	0.337287	1.14815	1.36773	0.982344	1.70608	0.801678	2.58226	0.496592	0.566679	1.80302	0.205116	0.895365
0.06	0.18	23.02	4.528	0	Q9Y3A0	COQ4	REVERSED Ubiquinone biosynthesis protein COQ4 homolog, mitochondrial	0	0.824138	0.725864	2.10863	0.394457	1.7378	0.469894	0.308401	2.10863	0.224906	0.990832	1.7378	0.386248	2.0893	0.831764	3.66438
0.08	0.21	49.2	7.2	0	Q9Y3A5	SBDS	REVERSED Ribosome maturation protein SBDS	0	0.946237	0.926667	2.0893	0.452898	1.97697	1.25892	0.651162	2.0893	0.60256	2.63027	0.744732	0.600228	2.0893	0.356451	1.55597
1.78	1.86	51.37	2.742	1.443	Q9Y592	CCDC41	Coiled-coil domain-containing protein 41	1	0.731139	0.252287	1.77011	0.405508	1.2942	0.772681	0.0621109	1.55597	0.487529	1.20226	0.937562	0.00895032	1.80302	0.519996	1.69044
0.05	0.14	34.53	2.878	0	Q9Y5J1	UTP18	REVERSED U3 small nucleolar RNA-associated protein 18 homolog	0	1.08643	0.849359	2.0893	0.519996	2.26987	1.70608	0.398486	2.0893	0.816582	3.56451	0.630957	0.457818	2.10863	0.301995	1.33045
0.45	0.61	26.09	2.795	2.795	Q9Y5Y7	LYVE1	Lymphatic vessel endothelial hyaluronic acid receptor 1	1	1.05682	0.903076	1.25892	0.83946	1.33045	0.954993	0.921759	1.23595	0.772681	1.18032	1.09648	0.827994	1.19124	0.92045	1.30617
0.07	0.18	40	3.846	0	Q9Y662	HS3ST3B1	REVERSED Heparan sulfate glucosamine 3-O-sulfotransferase 3B1	0	0.515229	0.344438	2.10863	0.246604	1.08643	1.7378	0.38952	2.10863	0.824138	3.63078	0.296483	0.199287	2.0893	0.140605	0.619441
0.08	0.14	20.94	1.92	0	Q9Y692	GMEB1	Glucocorticoid modulatory element-binding protein 1	0	1.1272	0.963965	4.48745	0.251189	5.05825	2.51189	0.530475	4.52898	0.554626	13.3045	0.440555	0.550803	4.48745	0.0879023	1.97697
0.06	0.09	29.8	6.623	0	Q9Y6H1	CHCHD2	REVERSED Coiled-coil-helix-coiled-coil-helix domain-containing protein 2, mitochondrial	0	2.14783	0.203491	25.5859	0.083946	28.8403	0.801678	0.616555	2.14783	0.37325	1.72187	2.63027	0.167666	27.2898	0.0963829	32.2107
0.07	0.11	36.44	2.239	0	Q9Y6T7	DGKB	REVERSED Diacylglycerol kinase beta	0	0.277971	0.490364	1.95885	0.0903649	0.544503	0.591562	0.771085	1.30617	0.359749	0.772681	0.452898	0.630917	1.67494	0.180302	0.758578
0.73	0.88	49.1	11.19	0	Q9Y6Z7	COLEC10	Collectin-10	0	2.35505	0.27022	2.0893	1.1272	4.96592	1.94089	0.33703	2.10863	0.92045	4.05509	1.20226	0.702974	2.0893	0.57544	2.53513
Abbreviation(s): Cov, Coverage; Pval, P value; EF, Error factor; CI, Confidence interval; MI, Myocardial infarctiona; NMI, Stable angina; Ctrl, Control; 113, 114 and 115, 8-plex isobaric tags.

## Sheet: PP2DPep
Supplemental Data S2, worksheet PP2DPep lists all non-redundant iTRAQ-quantified plasma peptides (FDR < 1%) obtained from combined triplicate LC-MS/MS dataset. The respective iTRAQ reporter ions 114MI:113Ctrl , 115NMI:113Ctrl and 114MI:115NMI ratios for each protein were calculated and exported from ProteinPilot™ V4.1 software. Unused ProtScore >2.02 correspond to FDR < 1% in combined searched da…
Unused	Total	%Cov	%Cov(50)	%Cov(95)	Accessions	Gene Name	Protein Description	Used	Annotation	Contrib	Conf	Sequence	Modifications	Cleavages	dMass	Prec MW	Prec m/z	Theor MW	Theor m/z	Theor z	Sc	Spectrum	Specific	Time	PrecursorSignal	PrecursorElution	MI(114):Ctrl (113)	%Err MI(114):Ctrl (113)	NMI (115):Ctrl (113)	%Err NMI (115):Ctrl (113)	MI(114):NMI (115)	%Err MI(114):NMI (115)	Area Ctrl (113)	Err Ctrl (113)	Area MI(114)	Err MI(114)	Area NMI (115)	Err NMI (115)	Background
671.34	671.34	81.33	66.47	59.83	P04114	APOB	Apolipoprotein B-100	1	auto	0	99	AAIQALR	iTRAQ8plex@N-term		-0.00100668	1045.65	523.834	1045.66	523.835	2	12	76.1.1.1022.11	1	11.7	2216549	11.3281	0.75262	8.06195	0.937447	7.35441	0.804396	8.37358	381.77	18.89	260.49	16.58	342.4	18.63	0
671.34	671.34	81.33	66.47	59.83	P04114	APOB	Apolipoprotein B-100	0	auto - discordant peptide type	0	26.06	AAIQALR	iTRAQ8plex@N-term; Deamidated(Q)@4; Deamidated(R)@7		0.0329917	1047.66	524.835	1047.62	524.819	2	10	78.1.1.1004.11	0	11.3979	215991	11.3762	1.31023	2.29311	0.937424	2.48912	1.4004	2.43163	3391.97	56.46	4029.14	63.55	3042.1	56.3	0
671.34	671.34	81.33	66.47	59.83	P04114	APOB	Apolipoprotein B-100	0	auto - discordant peptide type	0	62.12	AAIQALR	iTRAQ8plex@N-term; Trimethyl(R)@7		-0.000652972	1087.7	544.858	1087.7	544.858	2	12	86.1.1.1314.15	0	23.2681	60818	23.2833	0.945118	6.20781	0.942221	6.10176	1.00502	6.48295	555.11	22.8	475.64	22.14	500.4	22.58	0
671.34	671.34	81.33	66.47	59.83	P04114	APOB	Apolipoprotein B-100	0	auto - discordant peptide type	0	99	AASGTTGTYQEWK	iTRAQ8plex@N-term; Acetyl(S)@3; iTRAQ8plex(K)@13		-0.00287488	2049.06	684.027	2049.06	684.028	3	15	32.1.1.1179.20	0	12.5952	15791	12.6021	0.923848	28.8454	0.880941	28.7091	1.05074	30.6128	260.52	49.4	218.2	47.43	219.57	47.33	0
671.34	671.34	81.33	66.47	59.83	P04114	APOB	Apolipoprotein B-100	1	auto	0	99	AASGTTGTYQEWK	iTRAQ8plex@N-term; iTRAQ8plex(K)@13		-0.00342337	2007.05	670.024	2007.05	670.025	3	17	33.1.1.1159.18	1	12.0004	87298	12.0107	0.685394	4.94898	0.75675	4.6549	0.907462	5.3716	1079.67	31.76	670.88	26.7	781.68	28.2	0
671.34	671.34	81.33	66.47	59.83	P04114	APOB	Apolipoprotein B-100	0	auto - discordant peptide type	0	99	AASGTTGTYQEWK	iTRAQ8plex@N-term; iTRAQ8plex(Y)@9; iTRAQ8plex(K)@13		-0.0014873	2311.26	578.821	2311.26	578.822	4	15	53.1.1.1130.18	0	11.2427	85869	11.2529	0.989994	3.95194	0.94606	3.93989	1.04847	4.13087	1331.72	35.33	1195.25	35.01	1205.36	35.11	0
671.34	671.34	81.33	66.47	59.83	P04114	APOB	Apolipoprotein B-100	0	auto - discordant peptide type	0.000434512	99	ADSVVDLLSYNVQGSGETTYDHK	iTRAQ8plex@N-term; iTRAQ8plex(Y)@10; Dehydrated(D)@21; iTRAQ8plex(K)@23		0.00186788	3391.77	679.361	3391.77	679.361	5	15	11.1.1.1357.11	0	21.846	21495	21.7278	0.448191	29.0668	0.703782	23.4231	0.638065	31.1344	439.67	64.03	178.65	44.94	296.04	54.31	0
671.34	671.34	81.33	66.47	59.83	P04114	APOB	Apolipoprotein B-100	0	auto - shared MS/MS	0.00305075	40.62	AEALK	iTRAQ8plex@N-term; iTRAQ8plex(K)@5		-0.00458075	1138.71	570.364	1138.72	570.366	2	8	38.1.1.1115.15	0	10.5035	204715	10.5645	1.00184	3.8971	1.19264	3.64863	0.841645	3.84089	1363.58	35.75	1238.49	35.71	1555.88	39.48	0
671.34	671.34	81.33	66.47	59.83	P04114	APOB	Apolipoprotein B-100	0	auto - discordant peptide type	0	27.92	AEARSEILAHWSPAKLLLQMDSSATAYGSTVSKR	iTRAQ8plex@N-term; Dioxidation(W)@11; iTRAQ8plex(K)@15; iTRAQ8plex(K)@33	cleaved Q-A@N-term; missed R-S@4; missed K-L@15; missed K-R@33	0.0890028	4618.58	660.805	4618.49	660.792	7	11	63.1.1.1507.15	0	33.1143	8927	33.0828	1.05165	7.83446	0.707234	8.77061	1.48987	8.99195	326.34	17.49	311.14	17.78	220.81	15.33	0
671.34	671.34	81.33	66.47	59.83	P04114	APOB	Apolipoprotein B-100	0	auto - shared MS/MS	0.00348833	44.85	AEAVLK	iTRAQ8plex@N-term; iTRAQ8plex(K)@6	cleaved Q-A@N-term	-0.00300306	1237.78	413.601	1237.79	413.602	3	7	43.1.1.1058.3	0	12.8374	40772	13.0061	0.727357	22.0182	1.03079	19.2736	0.706999	22.3665	525.19	70.07	346.32	60.66	517.93	72.04	0
671.34	671.34	81.33	66.47	59.83	P04114	APOB	Apolipoprotein B-100	1	auto	0.05061	92.47	AEFTGR	iTRAQ8plex@N-term		-0.0015766	983.533	492.774	983.534	492.774	2	9	46.1.1.941.4	1	7.6478	3541	7.6665	1.1755	30.1819	1.28196	29.1934	0.918736	29.3249	41.55	8.83	44.28	9.49	50.96	10.2	0
671.34	671.34	81.33	66.47	59.83	P04114	APOB	Apolipoprotein B-100	0	auto - discordant peptide type	0	99	AEPLAFTFSHDYK	iTRAQ8plex@N-term; Dehydrated(D)@11; iTRAQ8plex(K)@13		0.000331226	2115.13	706.049	2115.12	706.049	3	15	61.1.1.1210.20	0	30.0911	21843	30.098	0.613841	25.9343	0.662544	24.3872	0.928284	28.7921	426.16	63.09	237.16	50.5	270.13	52.35	0
671.34	671.34	81.33	66.47	59.83	P04114	APOB	Apolipoprotein B-100	1	auto	0	99	AEPLAFTFSHDYK	iTRAQ8plex@N-term; iTRAQ8plex(K)@13		0.00224544	2133.14	534.292	2133.14	534.291	4	11	10.1.1.1301.9	1	18.3941	24649	18.2829	1.26854	31.4215	1.31917	30.7457	0.963476	30.205	184.14	41.59	211.77	46.26	232.4	48.48	0
671.34	671.34	81.33	66.47	59.83	P04114	APOB	Apolipoprotein B-100	0	auto - discordant peptide type	0	87.45	AEPLAFTFSHDYK	iTRAQ8plex@N-term; iTRAQ8plex(Y)@12; iTRAQ8plex(K)@13		-0.000586374	2437.34	610.342	2437.34	610.343	4	12	47.1.1.879.11	0	18.1484	113983	18.2148	1.50734	3.73871	1.45441	3.73168	1.0384	3.48885	1196.97	33.57	1635.72	40.44	1665.54	41	0
671.34	671.34	81.33	66.47	59.83	P04114	APOB	Apolipoprotein B-100	0	auto - discordant peptide type	0	98.08	AEPLAFTFSHDYK	iTRAQ8plex@N-term; Methyl(H)@10; iTRAQ8plex(K)@13		-0.00609038	2147.15	537.794	2147.15	537.795	4	12	13.1.1.1267.5	0	17.3163	16791	17.3485	7.27911	27.0243	5.12142	27.7647	1.42406	15.0541	155.44	39.24	1025.78	98.94	761.62	88.03	0
671.34	671.34	81.33	66.47	59.83	P04114	APOB	Apolipoprotein B-100	0	auto - discordant peptide type	0.00788851	97.43	AFTDLHLR	iTRAQ8plex@N-term	cleaved P-A@N-term	0.00192437	1275.73	426.249	1275.72	426.249	3	11	69.1.1.1103.2	0	15.6187	29053	15.6556	1.55589	6.41155	1.02716	7.06551	1.51768	6.62884	400.23	19.42	564.55	23.66	393.31	20.2	0
671.34	671.34	81.33	66.47	59.83	P04114	APOB	Apolipoprotein B-100	1	auto	0	99	AGHIAWTSSGK	iTRAQ8plex@N-term; iTRAQ8plex(K)@11		-0.00318058	1721.96	574.995	1721.97	574.996	3	12	65.1.1.889.17	1	11.1035	265035	10.9792	0.363219	19.4378	0.31888	19.5075	1.14125	24.4935	1176.22	104.69	387.32	66.93	358.84	62.29	0
671.34	671.34	81.33	66.47	59.83	P04114	APOB	Apolipoprotein B-100	0	auto - discordant peptide type	0	40.16	AGHIAWTSSGK	iTRAQ8plex@N-term; iTRAQ8plex(S)@9; iTRAQ8plex(K)@11		-0.00466222	2026.17	507.549	2026.17	507.55	4	10	72.1.1.968.15	0	9.4891	18637	9.4578	1.26894	5.23085	0.846748	5.80113	1.50151	5.71246	662.04	24.94	761.62	27.64	536.32	23.66	0
671.34	671.34	81.33	66.47	59.83	P04114	APOB	Apolipoprotein B-100	0	auto - discordant peptide type	1.05552	99	AHLDIAGSLEGH	iTRAQ8plex@N-term	cleaved H-L@C-term	0.000696993	1522.81	508.609	1522.8	508.609	3	16	2.1.1.1191.2	0	13.123	68914	13.1138	0.84822	7.08206	1.02738	6.56785	0.827209	7.23548	457.3	20.69	351.66	19.16	449.49	21.4	0
671.34	671.34	81.33	66.47	59.83	P04114	APOB	Apolipoprotein B-100	1	auto	0	99	AHLDIAGSLEGHLR	iTRAQ8plex@N-term		0.000975558	1791.99	598.337	1791.99	598.337	3	19	23.1.1.1229.13	1	20.1126	122323	20.1312	0.487281	15.6597	0.831536	12.4206	0.587137	16.3591	141.5	11.49	62.51	8.37	112.57	10.58	0
671.34	671.34	81.33	66.47	59.83	P04114	APOB	Apolipoprotein B-100	0	auto - discordant peptide type	0	99	AHLDIAGSLEGHLR	iTRAQ8plex@N-term; Acetyl(S)@8		0.00425088	1834.01	459.509	1834	459.507	4	15	25.1.1.1358.4	0	25.8978	13781	25.9763	1.71652	13.5377	0.526087	19.4278	3.26913	18.4664	85.87	9	133.63	11.45	43.22	7.07	0
671.34	671.34	81.33	66.47	59.83	P04114	APOB	Apolipoprotein B-100	0	auto - discordant peptide type	0	99	AHLDIAGSLEGHLR	iTRAQ8plex@N-term; Dehydrated(S)@8		0.00351849	1773.98	444.503	1773.98	444.502	4	17	65.1.1.911.7	0	12.0845	45464	12.0665	0.715667	5.64751	1.11987	4.79229	0.640297	5.63339	808.73	27.5	524.72	23.66	866.48	29.26	0
671.34	671.34	81.33	66.47	59.83	P04114	APOB	Apolipoprotein B-100	0	auto - discordant peptide type	0	99	AHLDIAGSLEGHLR	iTRAQ8plex@N-term; Methyl(H)@2		8.74077e-05	1806.01	452.509	1806.01	452.509	4	13	27.1.1.1214.4	0	19.5289	19483	19.5625	13.1338	19.7242	11.1184	19.8451	1.18356	7.76312	28.83	5.48	343.28	18.08	306.67	17.49	0
671.34	671.34	81.33	66.47	59.83	P04114	APOB	Apolipoprotein B-100	0	auto - discordant peptide type	0	27.01	AHLNIK	iTRAQ8plex@N-term; Deamidated(N)@4; iTRAQ8plex(K)@6		-0.0031981	1303.8	435.609	1303.81	435.61	3	8	53.1.1.1122.3	0	10.8505	37948	10.7943	0.850667	5.83108	1.51697	4.88306	0.561852	5.4964	677.39	25.18	522.41	23.47	983.11	31.13	0
671.34	671.34	81.33	66.47	59.83	P04114	APOB	Apolipoprotein B-100	1	auto	0.179799	98.07	AHLNIK	iTRAQ8plex@N-term; iTRAQ8plex(K)@6		-0.00391446	1302.82	435.28	1302.82	435.282	3	9	67.1.1.948.2	1	8.6936	41882	8.4684	1.12111	30.6329	1.15711	29.9758	0.970771	30.483	206.77	44.05	210.16	46.26	228.9	48.27	0
671.34	671.34	81.33	66.47	59.83	P04114	APOB	Apolipoprotein B-100	0	auto - shared MS/MS	0.00130484	21.42	AIEGK	iTRAQ8plex@N-term; iTRAQ8plex(K)@5	cleaved N-A@N-term	-0.00349876	1124.7	563.356	1124.7	563.358	2	7	35.1.1.1093.14	0	14.4644	14106	14.4813	0.553286	27.0257	0.745043	23.434	0.744062	29.0117	426.39	63.09	213.88	48.37	303.93	55.23	0
671.34	671.34	81.33	66.47	59.83	P04114	APOB	Apolipoprotein B-100	0	auto - discordant peptide type	0	49.26	AIQSLK	iTRAQ8plex@N-term; Deamidated(Q)@3; iTRAQ8plex(K)@6		-0.00261806	1267.79	423.605	1267.8	423.606	3	9	44.1.1.1049.3	0	12.4345	32611	12.4258	1.25702	5.28705	0.91024	5.72561	1.38365	5.64735	651.47	24.74	742.42	27.31	567.33	24.31	0
671.34	671.34	81.33	66.47	59.83	P04114	APOB	Apolipoprotein B-100	1	auto	0	41.96	AIQSLK	iTRAQ8plex@N-term; iTRAQ8plex(K)@6		-0.00657783	1266.81	423.276	1266.81	423.278	3	8	69.1.1.992.2	1	10.7012	188651	10.6922	1.06502	2.08322	0.855197	2.19056	1.24776	2.24734	4588.52	65.6	4430.4	67.13	3754.26	62.31	0
671.34	671.34	81.33	66.47	59.83	P04114	APOB	Apolipoprotein B-100	0	auto - discordant peptide type	0	99	ALNLPTLPEVK	iTRAQ8plex@N-term; iTRAQ8plex(K)@11	cleaved F-A@N-term	-0.000594008	1802.11	451.535	1802.11	451.535	4	11	50.1.1.1579.2	0	36.3036	17904	36.1591	0.799385	29.0828	0.821079	28.1433	0.975463	31.1835	281.13	51.28	203.74	46.15	220.84	47.33	0
671.34	671.34	81.33	66.47	59.83	P04114	APOB	Apolipoprotein B-100	0	auto - discordant peptide type	0	26.57	ALSHAVNNYHK	iTRAQ8plex@N-term; Deamidated(N)@8; iTRAQ8plex(K)@11	cleaved Y-A@N-term	0.0149678	1862.04	466.517	1862.03	466.514	4	9	71.1.1.962.11	0	9.2452	18145	9.3596	1.01277	8.20072	0.625939	9.45259	1.62113	9.74475	304.05	16.88	279.17	16.85	182.08	13.93	0
671.34	671.34	81.33	66.47	59.83	P04114	APOB	Apolipoprotein B-100	0	auto - discordant peptide type	0	99	ALSHAVNNYHK	iTRAQ8plex@N-term; iTRAQ8plex(K)@11	cleaved Y-A@N-term	-0.00287354	1861.04	466.267	1861.04	466.268	4	15	72.1.1.973.4	0	9.7066	46613	9.4578	0.749044	14.397	1.02951	12.7187	0.728981	14.6165	240.62	21.21	163.4	18.6	237	21.73	0
671.34	671.34	81.33	66.47	59.83	P04114	APOB	Apolipoprotein B-100	1	auto	0	99	ALVDTLK	iTRAQ8plex@N-term; iTRAQ8plex(K)@7		-0.00171744	1366.86	456.628	1366.86	456.629	3	11	43.1.1.1118.4	1	15.4882	1009490	15.6981	0.777302	2.51844	0.911986	2.33292	0.853968	2.6335	4295.38	63.39	3072.29	56.78	3766.7	61.7	224.6
671.34	671.34	81.33	66.47	59.83	P04114	APOB	Apolipoprotein B-100	1	auto	0	99	ALVEQGFTVPEIK	iTRAQ8plex@N-term; iTRAQ8plex(K)@13		-0.000967188	2038.19	680.404	2038.19	680.405	3	13	2.1.1.1386.12	1	21.9415	337105	22.2354	0.44294	5.75364	0.53923	5.103	0.823021	6.52832	1128.18	32.43	453.04	22.58	582.02	24.54	0
671.34	671.34	81.33	66.47	59.83	P04114	APOB	Apolipoprotein B-100	0	auto - discordant peptide type	0	63.03	ALYWVNGQVPDGVSK	iTRAQ8plex@N-term; Ammonia-loss(N)@6; iTRAQ8plex(K)@15		0.000299751	2223.22	556.811	2223.21	556.811	4	12	48.1.1.1278.11	0	40.5282	18873	40.5041	1.05424	25.6084	0.70642	28.4787	1.49527	29.1883	305.01	53.48	291.52	54.41	206.14	46.26	0
671.34	671.34	81.33	66.47	59.83	P04114	APOB	Apolipoprotein B-100	0	auto - discordant peptide type	0	22.32	ALYWVNGQVPDGVSK	iTRAQ8plex@N-term; Deamidated(N)@6; Deamidated(Q)@8; Dehydrated(D)@11; iTRAQ8plex(K)@15		0.0182065	2224.22	742.413	2224.2	742.407	3	12	48.1.1.1333.9	0	42.9896	7257	42.9512	1.05131	29.0964	1.35449	26.7523	0.77767	27.8308	71.45	14.18	68.1	14.49	92.59	16.61	0
671.34	671.34	81.33	66.47	59.83	P04114	APOB	Apolipoprotein B-100	0	auto - discordant peptide type	0	99	ALYWVNGQVPDGVSK	iTRAQ8plex@N-term; Dehydrated(D)@11; iTRAQ8plex(K)@15		-0.000703081	2222.23	741.751	2222.23	741.751	3	14	68.1.1.1594.18	0	37.5262	89466	37.7166	0.656484	7.83011	0.897583	6.8811	0.732807	8.17296	446.33	20.42	265.64	16.88	383.28	19.7	0
671.34	671.34	81.33	66.47	59.83	P04114	APOB	Apolipoprotein B-100	0	auto - discordant peptide type	0	96.87	ALYWVNGQVPDGVSK	iTRAQ8plex@N-term; Dehydrated(S)@14; iTRAQ8plex(K)@15		0.00113111	2222.23	556.565	2222.23	556.565	4	12	67.1.1.1595.9	0	37.5799	53004	37.5162	0.975914	7.30346	0.819284	7.56862	1.19349	7.93251	392.74	19.18	347.48	18.87	307.84	17.8	0
671.34	671.34	81.33	66.47	59.83	P04114	APOB	Apolipoprotein B-100	1	auto	0	99	ALYWVNGQVPDGVSK	iTRAQ8plex@N-term; iTRAQ8plex(K)@15		0.000805348	2240.24	747.755	2240.24	747.754	3	16	40.1.1.1371.21	1	21.8573	269885	22.0433	0.788912	4.07	0.924478	3.7803	0.855011	4.23763	1450.68	36.84	1037.56	33	1283.08	35.93	0
671.34	671.34	81.33	66.47	59.83	P04114	APOB	Apolipoprotein B-100	0	auto - discordant peptide type	0	26.86	ANLFNK	iTRAQ8plex@N-term; Deamidated(N)@2; iTRAQ8plex(K)@6		-0.00363061	1314.77	439.265	1314.78	439.266	3	7	40.1.1.1179.6	0	13.3462	22850	13.4656	0.509842	23.0485	0.484456	22.4224	1.05444	27.0987	622.69	76.22	287.82	56.21	288.61	54.22	0
671.34	671.34	81.33	66.47	59.83	P04114	APOB	Apolipoprotein B-100	0	auto - discordant peptide type	0	37.1	ANLFNK	iTRAQ8plex@N-term; Deamidated(N)@5; iTRAQ8plex(K)@6		-0.00247862	1314.77	439.265	1314.78	439.266	3	8	37.1.1.1197.4	0	13.6374	30164	13.7169	1.42836	7.80527	1.46233	7.67902	0.97866	7.28475	281.65	16.28	364.72	19.13	394.04	19.92	0
671.34	671.34	81.33	66.47	59.83	P04114	APOB	Apolipoprotein B-100	1	auto	0.145694	97.53	ANLFNK	iTRAQ8plex@N-term; iTRAQ8plex(K)@6		-0.00222701	1313.79	438.937	1313.79	438.938	3	10	69.1.1.1053.5	1	13.4194	1071503	13.3175	0.960756	1.44474	0.868764	1.46502	1.10803	1.54439	10137.8	97.46	8830.21	95.23	8426.2	93.15	0
671.34	671.34	81.33	66.47	59.83	P04114	APOB	Apolipoprotein B-100	0	auto - shared MS/MS	0	99	AQIPILR	iTRAQ8plex@N-term		0.000610203	1113.72	557.866	1113.72	557.866	2	12	83.1.1.1020.19	0	14.533	126221	14.4516	0.985584	19.2169	1.08623	18.3586	0.909103	19.364	565.58	72.8	505.36	72.11	587.76	76.94	0
671.34	671.34	81.33	66.47	59.83	P04114	APOB	Apolipoprotein B-100	0	auto - discordant peptide type	0	91.56	AQIPILR	iTRAQ8plex@N-term; Deamidated(Q)@2		-0.00495217	1114.7	558.356	1114.7	558.358	2	11	56.1.1.974.10	0	16.876	38300	16.8552	1.15572	18.9026	0.657866	22.2756	1.76018	22.3708	531.67	70.64	557.07	74.9	334.63	59.83	0
671.34	671.34	81.33	66.47	59.83	P04114	APOB	Apolipoprotein B-100	0	auto - discordant peptide type	0.000434512	56.76	AQLSNPK	iTRAQ8plex@N-term; iTRAQ8plex(K)@7	cleaved N-A@N-term	-0.005946	1364.82	455.947	1364.82	455.949	3	9	62.1.1.921.10	0	6.9714	15658	6.995	0.726365	24.441	0.743074	23.5788	0.979406	26.7017	424.65	63.01	279.64	54.31	301.89	55.32	0
671.34	671.34	81.33	66.47	59.83	P04114	APOB	Apolipoprotein B-100	0	auto - discordant peptide type	0	99	AQNLYQELLTQEGQASFQGLK	iTRAQ8plex@N-term; Deamidated(N)@3; iTRAQ8plex(K)@21		0.0196071	2974.61	744.659	2974.59	744.654	4	15	5.1.1.2111.17	0	59.1585	45221	59.2558	1.26556	9.83633	1.04097	10.2527	1.2181	10.0893	938.81	66.41	1077.14	73.62	934.98	69.39	0
671.34	671.34	81.33	66.47	59.83	P04114	APOB	Apolipoprotein B-100	0	auto - discordant peptide type	0	99	AQNLYQELLTQEGQASFQGLK	iTRAQ8plex@N-term; Deamidated(Q)@11; iTRAQ8plex(K)@21		0.0215603	2974.61	744.659	2974.59	744.654	4	17	5.1.1.2115.9	0	59.3331	45221	59.2558	1.28345	3.62243	0.882741	3.9876	1.45675	3.91558	1372.87	35.92	1597.43	40.02	1159.44	34.89	0
671.34	671.34	81.33	66.47	59.83	P04114	APOB	Apolipoprotein B-100	0	auto - discordant peptide type	0	99	AQNLYQELLTQEGQASFQGLK	iTRAQ8plex@N-term; Deamidated(Q)@14; iTRAQ8plex(K)@21		0.0175409	2974.6	744.658	2974.59	744.654	4	16	6.1.1.2094.15	0	58.385	55434	58.4442	1.55659	3.57942	1.26153	3.73803	1.23629	3.48291	1285.61	34.8	1814.25	42.49	1551.64	40	0
671.34	671.34	81.33	66.47	59.83	P04114	APOB	Apolipoprotein B-100	0	auto - discordant peptide type	0	99	AQNLYQELLTQEGQASFQGLK	iTRAQ8plex@N-term; Deamidated(Q)@6; iTRAQ8plex(K)@21		0.0178981	2974.6	744.658	2974.59	744.654	4	16	5.1.1.2119.13	0	59.5107	45221	59.2558	1.91297	14.1561	0.950013	16.8289	2.01752	15.2564	376.72	42.19	653.34	56.57	342.4	43.01	0
671.34	671.34	81.33	66.47	59.83	P04114	APOB	Apolipoprotein B-100	1	auto	0	99	AQNLYQELLTQEGQASFQGLK	iTRAQ8plex@N-term; iTRAQ8plex(K)@21		0.00044217	2973.6	744.408	2973.6	744.408	4	15	5.1.1.2122.11	1	59.6479	228683	59.2995	0.907276	21.2502	1.13547	19.5171	0.800576	21.1654	243.48	33.76	200.27	32.25	264.5	36.33	0
671.34	671.34	81.33	66.47	59.83	P04114	APOB	Apolipoprotein B-100	0	auto - discordant peptide type	2	99	ASGSLPYTQTLQDHLN	iTRAQ8plex@N-term	cleaved N-S@C-term	0.0018735	2048.05	683.691	2048.05	683.69	3	18	13.1.1.1239.9	0	16.1163	38501	16.1216	0.51703	19.4048	0.63664	17.2143	0.813697	21.4172	261.49	27.06	122.57	20.12	159.27	21.91	0
671.34	671.34	81.33	66.47	59.83	P04114	APOB	Apolipoprotein B-100	0	auto - discordant peptide type	0	83.39	ASGSLPYTQTLQDHLNSLK	iTRAQ8plex@N-term; Deamidated(N)@16; iTRAQ8plex(K)@19		0.0271041	2681.48	671.376	2681.45	671.369	4	11	44.1.1.1551.18	0	34.8002	2788	34.7648	0.96497	29.7858	0.924381	29.6075	1.04593	31.2505	238.01	47.22	208.22	46.26	210.49	46.26	0
671.34	671.34	81.33	66.47	59.83	P04114	APOB	Apolipoprotein B-100	0	auto - discordant peptide type	0	37.4	ASGSLPYTQTLQDHLNSLK	iTRAQ8plex@N-term; Deamidated(Q)@12; Deamidated(N)@16; iTRAQ8plex(K)@19		0.0195381	2682.45	537.498	2682.43	537.494	5	9	11.1.1.1240.7	0	16.6158	3999	16.6444	0.574781	28.6179	1.08773	22.4322	0.529446	28.6315	371.68	58.91	193.68	46.15	386.79	61.4	0
671.34	671.34	81.33	66.47	59.83	P04114	APOB	Apolipoprotein B-100	0	auto - discordant peptide type	0	99	ASGSLPYTQTLQDHLNSLK	iTRAQ8plex@N-term; Deamidated(Q)@12; iTRAQ8plex(K)@19		-0.00115855	2681.45	671.369	2681.45	671.369	4	15	10.1.1.1398.11	0	22.7295	22658	22.7049	0.754629	27.5069	0.682756	27.9333	1.10741	31.039	326.16	55.23	223.14	48.37	213.05	47.33	0
671.34	671.34	81.33	66.47	59.83	P04114	APOB	Apolipoprotein B-100	0	auto - discordant peptide type	0	99	ASGSLPYTQTLQDHLNSLK	iTRAQ8plex@N-term; Deamidated(Q)@9; iTRAQ8plex(K)@19		0.00350977	2681.45	671.37	2681.45	671.369	4	16	15.1.1.1341.10	0	20.2927	19612	20.3047	0.860062	26.4554	1.04685	24.5762	0.823166	26.9702	162.39	27.57	126.62	25.69	162.64	28.9	0
671.34	671.34	81.33	66.47	59.83	P04114	APOB	Apolipoprotein B-100	1	auto	0	99	ASGSLPYTQTLQDHLNSLK	iTRAQ8plex@N-term; iTRAQ8plex(K)@19		0.000913657	2680.47	671.124	2680.46	671.123	4	15	46.1.1.1564.18	1	35.1384	376964	34.6669	0.787159	26.7192	1.07349	23.773	0.734694	26.9325	337.82	56.21	241.08	50.4	346.95	58.91	0
671.34	671.34	81.33	66.47	59.83	P04114	APOB	Apolipoprotein B-100	0	auto - discordant peptide type	0	84.62	ASGSLPYTQTLQDHLNSLK	iTRAQ8plex@N-term; iTRAQ8plex(T)@8; iTRAQ8plex(K)@19		0.000354077	2984.67	597.941	2984.67	597.941	5	12	59.1.1.1273.14	0	16.8447	51200	16.9938	1.09052	19.6307	0.799905	21.2672	1.36595	21.6681	509.6	69.14	503.82	71.48	389.99	63.87	0
671.34	671.34	81.33	66.47	59.83	P04114	APOB	Apolipoprotein B-100	0	auto - discordant peptide type	0	99	ASGSLPYTQTLQDHLNSLK	iTRAQ8plex@N-term; iTRAQ8plex(Y)@7; iTRAQ8plex(K)@19		0.00401481	2984.67	597.942	2984.67	597.941	5	15	58.1.1.1269.12	0	16.687	43337	16.8394	0.95122	21.865	1.04652	20.8546	0.910692	22.2065	446.2	64.65	384.79	63.01	446.75	67.01	0
671.34	671.34	81.33	66.47	59.83	P04114	APOB	Apolipoprotein B-100	0	auto - discordant peptide type	0	32.7	ASLHTEK	No iTRAQ8plex@N-term; iTRAQ8plex(K)@7	cleaved V-A@N-term	-0.000923409	1088.61	545.313	1088.61	545.314	2	10	37.1.1.1125.15	0	10.4542	58565	10.4695	0.855354	27.3728	0.782636	27.5998	1.09503	29.9014	303.42	53.29	235.29	49.4	227.19	48.37	0
671.34	671.34	81.33	66.47	59.83	P04114	APOB	Apolipoprotein B-100	0	auto - discordant peptide type	0	90.34	ASQPSSFHDFPDLGQEVALNANTK	iTRAQ8plex@N-term; iTRAQ8plex(S)@6; iTRAQ8plex(K)@24	cleaved H-A@N-term	0.000961315	3484.84	581.813	3484.84	581.813	6	11	12.1.1.1268.13	0	16.9618	10483	17.0268	1.39777	24.6424	0.570561	32.367	2.45456	31.4991	283.86	51.67	359.71	59.75	154.95	41.47	0
671.34	671.34	81.33	66.47	59.83	P04114	APOB	Apolipoprotein B-100	0	auto - discordant peptide type	0	99	ATFQTPDFIVPLTDLR	iTRAQ8plex@N-term; Dehydrated(D)@14		0.0015384	2119.16	707.395	2119.16	707.395	3	18	65.1.1.1494.8	0	37.9299	31478	37.8534	1.10808	25.8468	0.838007	27.8179	1.32484	28.2545	87.41	15.68	87.81	16.34	70.08	14.9	0
671.34	671.34	81.33	66.47	59.83	P04114	APOB	Apolipoprotein B-100	0	auto - discordant peptide type	0	99	ATFQTPDFIVPLTDLR	iTRAQ8plex@N-term; Dehydrated(D)@7		0.00226281	2119.16	707.395	2119.16	707.395	3	16	58.1.1.1781.20	0	39.6133	112048	39.6644	1.6889	7.50946	1.36653	7.82507	1.23829	7.12357	282.05	16.31	431.86	20.69	368.75	19.44	0
671.34	671.34	81.33	66.47	59.83	P04114	APOB	Apolipoprotein B-100	0	auto - discordant peptide type	0	99	ATGVLYDYVNK	iTRAQ8plex@N-term; Dehydrated(D)@7; iTRAQ8plex(K)@11		-0.00135195	1832.03	611.683	1832.03	611.684	3	14	74.1.1.1479.11	0	17.5351	46990	17.5403	0.87303	16.5721	0.905235	16.0686	0.966291	17.4365	409.13	43.76	323.82	40.99	354.33	42.49	0
671.34	671.34	81.33	66.47	59.83	P04114	APOB	Apolipoprotein B-100	1	auto	0	99	ATGVLYDYVNK	iTRAQ8plex@N-term; iTRAQ8plex(K)@11		-0.00086445	1850.04	617.687	1850.04	617.687	3	13	37.1.1.1287.10	1	17.6575	38873	17.5929	0.62708	9.85161	1.33134	7.6541	0.471925	9.6028	294.42	16.58	167.38	13.53	375.01	19.44	0
671.34	671.34	81.33	66.47	59.83	P04114	APOB	Apolipoprotein B-100	0	auto - discordant peptide type	0	47.72	ATGVLYDYVNK	iTRAQ8plex@N-term; Methyl(D)@7; iTRAQ8plex(K)@11		-0.000489321	1864.05	622.359	1864.06	622.359	3	11	42.1.1.1274.6	0	17.4636	32655	17.3094	1.77319	24.6657	1.51983	25.2732	1.16896	22.599	128.2	24.6	206.09	31.94	186.41	30.66	0
671.34	671.34	81.33	66.47	59.83	P04114	APOB	Apolipoprotein B-100	0	auto - discordant peptide type	0	96.42	ATGVLYDYVNK	iTRAQ8plex@N-term; Methyl(N)@10; iTRAQ8plex(K)@11		-0.00124718	1864.05	622.359	1864.06	622.359	3	14	41.1.1.1278.5	0	17.632	33466	17.6639	13.1082	44.07	10.2809	44.5028	1.27747	17.776	57.67	24.49	685.34	80.75	567.24	75.5	0
671.34	671.34	81.33	66.47	59.83	P04114	APOB	Apolipoprotein B-100	0	auto - discordant peptide type	0.000434512	52.35	ATLYAL	iTRAQ8plex@N-term	cleaved L-S@C-term	-0.00161134	954.568	478.291	954.569	478.292	2	8	67.1.1.1343.6	0	26.2436	16514	26.2738	0.664628	13.366	1.34177	10.5379	0.496297	12.9447	153.05	11.96	92.22	10	196.47	13.89	0
671.34	671.34	81.33	66.47	59.83	P04114	APOB	Apolipoprotein B-100	0	auto - discordant peptide type	0	99	ATLYALSH	iTRAQ8plex@N-term	cleaved H-A@C-term	-0.0011386	1178.66	590.337	1178.66	590.337	2	14	70.1.1.1112.18	0	15.8685	222424	15.7414	1.00585	6.86097	0.874463	7.04187	1.15247	7.33497	437.44	20.25	398.9	20.2	365.97	19.42	0
671.34	671.34	81.33	66.47	59.83	P04114	APOB	Apolipoprotein B-100	0	auto - discordant peptide type	0	29.11	ATLYALSH	iTRAQ8plex@N-term; iTRAQ8plex(H)@8	cleaved H-A@C-term	0.00997853	1482.88	495.299	1482.87	495.296	3	10	83.1.1.977.15	0	12.5894	315864	12.7403	0.841077	17.7507	0.939679	16.7738	0.896802	18.4493	730.87	82.7	557.3	76.22	657.06	81.36	0
671.34	671.34	81.33	66.47	59.83	P04114	APOB	Apolipoprotein B-100	0	auto - discordant peptide type	0	99	ATLYALSHAVNNYHK	iTRAQ8plex@N-term; Deamidated(N)@11; iTRAQ8plex(K)@15		1.61976e-05	2310.26	578.572	2310.26	578.572	4	15	62.1.1.1200.13	0	19.4238	45839	19.4887	0.778596	5.98512	0.813044	5.7788	0.959485	6.44437	675.69	25.14	476.95	22.36	525.59	23.24	0
671.34	671.34	81.33	66.47	59.83	P04114	APOB	Apolipoprotein B-100	0	auto - discordant peptide type	0	97.09	ATLYALSHAVNNYHK	iTRAQ8plex@N-term; Deamidated(N)@12; iTRAQ8plex(K)@15		-0.00536321	2310.25	578.571	2310.26	578.572	4	12	63.1.1.1305.10	0	23.9702	28127	23.9938	1.16808	25.3792	0.975244	26.4437	1.20005	26.5484	294.04	52.54	311.38	56.12	274.35	53.48	0
671.34	671.34	81.33	66.47	59.83	P04114	APOB	Apolipoprotein B-100	0	auto - discordant peptide type	0	99	ATLYALSHAVNNYHK	iTRAQ8plex@N-term; Deamidated(N)@12; iTRAQ8plex(Y)@13; iTRAQ8plex(K)@15		0.00256754	2614.47	523.9	2614.46	523.9	5	14	68.1.1.1243.8	0	21.7984	37274	21.7789	0.784325	4.83012	0.985575	4.40511	0.797346	4.96598	1034.87	31.11	735.86	27.82	975.8	31.42	0
671.34	671.34	81.33	66.47	59.83	P04114	APOB	Apolipoprotein B-100	0	auto - discordant peptide type	0	80.09	ATLYALSHAVNNYHK	iTRAQ8plex@N-term; iTRAQ8plex(H)@8; Deamidated(N)@12; iTRAQ8plex(K)@15		-0.000928589	2614.46	523.9	2614.46	523.9	5	12	66.1.1.991.7	0	14.7863	16543	14.7701	0.524774	24.2978	0.506098	23.6975	1.03891	28.481	547.59	71.48	260.52	53.39	265.14	52.44	0
671.34	671.34	81.33	66.47	59.83	P04114	APOB	Apolipoprotein B-100	0	auto - discordant peptide type	0	83.36	ATLYALSHAVNNYHK	iTRAQ8plex@N-term; iTRAQ8plex(H)@8; iTRAQ8plex(K)@15		-0.00360119	2613.48	523.702	2613.48	523.703	5	12	82.1.1.1100.10	0	15.0436	189629	15.1115	0.949015	2.79512	0.894242	2.79339	1.06331	2.95817	2729.54	50.57	2348.42	49.15	2335.23	48.82	0
671.34	671.34	81.33	66.47	59.83	P04114	APOB	Apolipoprotein B-100	1	auto	0	99	ATLYALSHAVNNYHK	iTRAQ8plex@N-term; iTRAQ8plex(K)@15		-0.0019753	2309.27	578.325	2309.27	578.326	4	15	74.1.1.1473.10	1	17.2635	15638	17.2788	1.14729	27.9083	1.76549	24.8633	0.651104	25.2576	123.6	24.08	128.56	25.69	208.77	32.25	0
671.34	671.34	81.33	66.47	59.83	P04114	APOB	Apolipoprotein B-100	0	auto - discordant peptide type	0	78.97	ATLYALSHAVNNYHK	iTRAQ8plex@N-term; iTRAQ8plex(S)@7; iTRAQ8plex(H)@8; iTRAQ8plex(K)@15		-0.00215403	2917.68	487.288	2917.68	487.288	6	13	82.1.1.1082.10	0	14.2354	177789	14.1244	1.01072	3.55293	1.27762	3.27486	0.792622	3.44528	1633.39	39.13	1496.69	39.27	1996.54	44.58	0
671.34	671.34	81.33	66.47	59.83	P04114	APOB	Apolipoprotein B-100	0	auto - discordant peptide type	0	92.18	ATLYALSHAVNNYHK	iTRAQ8plex@N-term; iTRAQ8plex(S)@7; iTRAQ8plex(K)@15		-0.00335894	2613.48	523.702	2613.48	523.703	5	13	80.1.1.1143.8	0	17.522	28020	17.5373	0.956702	19.9669	1.11872	18.7332	0.856833	19.9609	266.85	35.36	231.45	34.57	285.61	37.82	0
671.34	671.34	81.33	66.47	59.83	P04114	APOB	Apolipoprotein B-100	0	auto - discordant peptide type	0	99	ATLYALSHAVNNYHK	iTRAQ8plex@N-term; iTRAQ8plex(Y)@13; iTRAQ8plex(K)@15		-0.00269727	2613.48	654.376	2613.48	654.377	4	13	82.1.1.1100.19	0	15.0586	55031	15.0225	1.33454	4.97612	1.61844	4.70303	0.826181	4.54533	716.97	25.96	867.45	29.61	1110.15	33.32	0
671.34	671.34	81.33	66.47	59.83	P04114	APOB	Apolipoprotein B-100	0	auto - discordant peptide type	0	27.25	ATLYALSHAVNNYHK	iTRAQ8plex@N-term; iTRAQ8plex(Y)@4; Deamidated(N)@11; iTRAQ8plex(K)@15		-0.00614488	2614.46	523.899	2614.46	523.9	5	10	64.1.1.1211.8	0	14.2485	14590	14.2313	0.518363	28.6011	1.10427	21.4019	0.470324	28.5551	405.09	61.48	190.37	46.15	427.97	64.58	0
671.34	671.34	81.33	66.47	59.83	P04114	APOB	Apolipoprotein B-100	0	auto - discordant peptide type	0	19.91	ATLYALSHAVNNYHK	iTRAQ8plex@N-term; iTRAQ8plex(Y)@4; iTRAQ8plex(H)@8; iTRAQ8plex(K)@15		-0.00248659	2917.68	487.288	2917.68	487.288	6	11	84.1.1.962.8	0	13.8967	179603	13.8788	0.929666	2.11249	1.00351	2.02488	0.928206	2.16726	4845.07	67.36	4083.57	64.95	4651.66	68.48	0
671.34	671.34	81.33	66.47	59.83	P04114	APOB	Apolipoprotein B-100	0	auto - discordant peptide type	0	85.24	ATLYALSHAVNNYHK	iTRAQ8plex@N-term; iTRAQ8plex(Y)@4; iTRAQ8plex(K)@15		-1.13022e-05	2613.48	523.703	2613.48	523.703	5	12	77.1.1.1162.10	0	18.1854	20289	18.1537	0.996876	17.0064	0.768027	18.1391	1.30048	18.8684	357.45	40.93	323.05	40.62	262.65	36.95	0
671.34	671.34	81.33	66.47	59.83	P04114	APOB	Apolipoprotein B-100	0	auto - discordant peptide type	0	34.31	ATLYALSHAVNNYHK	iTRAQ8plex@N-term; iTRAQ8plex(Y)@4; iTRAQ8plex(Y)@13; iTRAQ8plex(K)@15		-0.0110103	2917.67	487.286	2917.68	487.288	6	11	67.1.1.1045.8	0	13.0033	31891	12.9856	0.886769	4.28972	0.906658	4.17371	0.979958	4.50887	1209.07	33.65	972.02	31.73	1048.77	32.62	0
671.34	671.34	81.33	66.47	59.83	P04114	APOB	Apolipoprotein B-100	0	auto - discordant peptide type	0.00305075	80.78	AVSMPSF	iTRAQ8plex@N-term	cleaved F-S@C-term	-0.00141461	1041.55	521.78	1041.55	521.781	2	9	63.1.1.1420.4	0	29.0966	24482	29.1768	1.09362	20.7076	0.824785	22.2389	1.32852	22.6529	457.35	65.5	453.45	67.82	360.89	61.4	0
671.34	671.34	81.33	66.47	59.83	P04114	APOB	Apolipoprotein B-100	1	auto	0	99	AVSMPSFSILGSDVR	iTRAQ8plex@N-term		0.0023539	1869	624.007	1869	624.006	3	20	50.1.1.1821.11	1	47.1493	341118	46.6803	1.15368	9.16858	1.58316	8.36747	0.730126	8.47022	228.02	14.63	238.49	15.62	345.37	18.55	0
671.34	671.34	81.33	66.47	59.83	P04114	APOB	Apolipoprotein B-100	0	auto - discordant peptide type	0	99	AVSMPSFSILGSDVR	iTRAQ8plex@N-term; Acetyl(S)@3		0.00460239	1911.01	638.011	1911.01	638.01	3	17	52.1.1.1525.8	0	28.86	27478	28.8853	0.753838	25.4459	0.555153	27.6412	1.36052	30.3374	190.35	29.83	130.09	26.08	101.1	23.02	0
671.34	671.34	81.33	66.47	59.83	P04114	APOB	Apolipoprotein B-100	0	auto - discordant peptide type	0	60.16	AVSMPSFSILGSDVR	iTRAQ8plex@N-term; Carboxy(M)@4		0.02921	1913.02	638.679	1912.99	638.67	3	13	54.1.1.1533.6	0	29.1035	36972	28.9947	1.34583	26.1486	0.905953	28.9069	1.48842	28.083	128.7	24.6	157.03	28.02	111.55	24.19	0
671.34	671.34	81.33	66.47	59.83	P04114	APOB	Apolipoprotein B-100	0	auto - discordant peptide type	0	99	AVSMPSFSILGSDVR	iTRAQ8plex@N-term; Deamidated(R)@15		0.021932	1870	624.342	1869.98	624.334	3	18	50.1.1.1803.12	0	46.3594	150677	46.3308	1.16905	2.65138	1.02624	2.7157	1.14136	2.72704	2694.26	50.29	2855.52	53.77	2645.3	52.18	0
671.34	671.34	81.33	66.47	59.83	P04114	APOB	Apolipoprotein B-100	0	auto - discordant peptide type	0	99	AVSMPSFSILGSDVR	iTRAQ8plex@N-term; iTRAQ8plex(S)@12		-0.00318375	2173.2	544.307	2173.2	544.308	4	16	64.1.1.1394.10	0	22.3791	28302	22.4953	0.927793	27.6841	0.805834	28.3625	1.15358	30.1048	281.87	51.38	237.09	49.4	217.31	47.22	0
671.34	671.34	81.33	66.47	59.83	P04114	APOB	Apolipoprotein B-100	0	auto - discordant peptide type	0	99	AVSMPSFSILGSDVR	iTRAQ8plex@N-term; iTRAQ8plex(S)@3		-0.00386775	2173.2	544.307	2173.2	544.308	4	16	62.1.1.1530.2	0	34.3063	79799	34.2535	1.10877	4.79781	1.07705	4.76501	1.03145	4.85551	847.41	28.2	851.82	29.44	873.2	29.78	0
671.34	671.34	81.33	66.47	59.83	P04114	APOB	Apolipoprotein B-100	0	auto - discordant peptide type	0	99	AVSMPSFSILGSDVR	iTRAQ8plex@N-term; iTRAQ8plex(S)@6		-0.00375833	2173.2	544.307	2173.2	544.308	4	14	61.1.1.1277.8	0	33.1524	93589	33.2726	0.983673	4.37095	1.19454	4.06588	0.825067	4.30491	1095.95	32.05	977.36	31.75	1252.5	35.38	0
671.34	671.34	81.33	66.47	59.83	P04114	APOB	Apolipoprotein B-100	0	auto - discordant peptide type	0	99	AVSMPSFSILGSDVR	iTRAQ8plex@N-term; iTRAQ8plex(S)@8		-0.00278176	2173.2	544.307	2173.2	544.308	4	16	61.1.1.1292.5	0	33.8439	65032	33.922	1.27578	5.41313	1.52856	5.11321	0.83624	5.01218	619.43	24.12	716.44	26.94	905.86	30.02	0
671.34	671.34	81.33	66.47	59.83	P04114	APOB	Apolipoprotein B-100	0	auto - discordant peptide type	0	99	AVSMPSFSILGSDVR	iTRAQ8plex@N-term; Oxidation(M)@4		0.000957537	1884.99	629.338	1884.99	629.338	3	12	50.1.1.1462.15	0	31.1756	125572	31.1026	0.936141	8.0252	1.21227	7.32217	0.77372	7.88265	335.23	17.72	284.51	17.18	388.8	19.7	0
671.34	671.34	81.33	66.47	59.83	P04114	APOB	Apolipoprotein B-100	0	auto - discordant peptide type	0	21.51	CSTHILQWLK	iTRAQ8plex@N-term; Methylthio(C)@1; iTRAQ8plex(K)@10	cleaved Q-C@N-term	-0.00207644	1882.04	471.517	1882.04	471.518	4	10	83.1.1.1643.7	0	42.028	23000	41.9197	2.95297	9.79287	2.26316	10.197	1.30733	7.80188	137.34	11.45	367.68	18.89	297.37	17.46	0
671.34	671.34	81.33	66.47	59.83	P04114	APOB	Apolipoprotein B-100	0	auto - discordant peptide type	0.00436481	86.04	CVQSTK	iTRAQ8plex@N-term; Methylthio(C)@1; iTRAQ8plex(K)@6	cleaved K-P@C-term	-0.00240542	1318.72	660.366	1318.72	660.367	2	10	66.1.1.898.21	0	10.6488	131014	10.654	1.19867	4.28813	1.24532	4.18367	0.964406	4.17704	1018.2	30.92	1106.49	33.5	1213.11	34.91	0
671.34	671.34	81.33	66.47	59.83	P04114	APOB	Apolipoprotein B-100	0	auto - discordant peptide type	0	98.82	CVQSTKPSLMIQK	iTRAQ8plex@N-term; Methylthio(C)@1; Deamidated(Q)@3; iTRAQ8plex(K)@6; iTRAQ8plex(K)@13		-0.0020153	2421.35	606.346	2421.36	606.346	4	13	59.1.1.1209.14	0	13.9944	65108	14.0113	2.31428	4.61272	2.00179	4.71382	1.15835	3.87124	665.32	25.12	1395.92	36.99	1274.19	35.96	0
671.34	671.34	81.33	66.47	59.83	P04114	APOB	Apolipoprotein B-100	0	auto - discordant peptide type	0	94.63	CVQSTKPSLMIQK	iTRAQ8plex@N-term; Methylthio(C)@1; iTRAQ8plex(K)@6; Deamidated(Q)@12; iTRAQ8plex(K)@13		-0.00114444	2421.35	606.346	2421.36	606.346	4	12	56.1.1.966.12	0	16.5246	32453	16.6773	1.62505	21.5977	1.56392	21.5551	1.0411	19.6924	346.93	57.18	511.12	71.34	519.09	72.11	0
671.34	671.34	81.33	66.47	59.83	P04114	APOB	Apolipoprotein B-100	1	auto	0	99	CVQSTKPSLMIQK	iTRAQ8plex@N-term; Methylthio(C)@1; iTRAQ8plex(K)@6; iTRAQ8plex(K)@13		-0.00327635	2420.37	606.1	2420.37	606.1	4	12	71.1.1.1133.19	1	16.8398	81748	16.8038	2.63283	21.2834	2.92228	20.8543	0.902697	15.9756	300.69	53.48	717.72	83.9	840.67	91.54	0
671.34	671.34	81.33	66.47	59.83	P04114	APOB	Apolipoprotein B-100	0	auto - discordant peptide type	0	99	CVQSTKPSLMIQK	iTRAQ8plex@N-term; Methylthio(C)@1; iTRAQ8plex(K)@6; Oxidation(M)@10; iTRAQ8plex(K)@13		-0.00321749	2436.36	610.098	2436.37	610.099	4	12	67.1.1.1063.19	0	13.8225	53616	13.7434	1.6467	5.47276	2.13821	5.14274	0.771623	4.62661	538.86	22.54	804.46	28.39	1102.33	32.98	0
671.34	671.34	81.33	66.47	59.83	P04114	APOB	Apolipoprotein B-100	0	auto - discordant peptide type	0	99	DAVEKPQEFTIVAFVK	iTRAQ8plex@N-term; iTRAQ8plex(K)@5; Deamidated(Q)@7; iTRAQ8plex(K)@16		0.0127914	2733.58	684.404	2733.57	684.4	4	14	2.1.1.1398.10	0	22.487	552934	22.6474	0.700133	4.15834	0.773655	3.91365	0.90672	4.49461	1506.42	37.52	956.18	31.84	1115.01	33.66	0
671.34	671.34	81.33	66.47	59.83	P04114	APOB	Apolipoprotein B-100	1	auto	0	99	DAVEKPQEFTIVAFVK	iTRAQ8plex@N-term; iTRAQ8plex(K)@5; iTRAQ8plex(K)@16		-0.00211057	2732.59	684.154	2732.59	684.154	4	12	3.1.1.1632.13	1	22.9523	494524	22.7474	0.808978	5.26626	0.853966	5.0536	0.949154	5.59326	850.8	28.21	623.99	25.53	695.11	26.51	0
671.34	671.34	81.33	66.47	59.83	P04114	APOB	Apolipoprotein B-100	0	auto - discordant peptide type	0	16.44	DFSLWEK	iTRAQ8plex@N-term; iTRAQ8plex(S)@3; iTRAQ8plex(K)@7		-0.0051119	1836.05	460.02	1836.05	460.021	4	8	27.1.1.1232.3	0	20.3279	12648	20.3632	0.978966	7.6379	0.827223	7.9155	1.18573	8.29024	358.57	18.33	318.24	18.06	283.78	17.15	0
671.34	671.34	81.33	66.47	59.83	P04114	APOB	Apolipoprotein B-100	1	auto	0	99	DKAQNLYQELLTQEGQASFQGLK	iTRAQ8plex@N-term; iTRAQ8plex(K)@2; iTRAQ8plex(K)@23	missed K-A@2	-0.00468028	3520.93	881.239	3520.93	881.24	4	19	6.1.1.1927.7	1	50.9802	26294	51.1159	1.50999	18.5033	1.6322	17.9997	0.926917	16.7682	97.71	13.56	133.76	16.37	152.58	17.49	0
671.34	671.34	81.33	66.47	59.83	P04114	APOB	Apolipoprotein B-100	1	auto	0	99	DKIGVELTGR	iTRAQ8plex@N-term; iTRAQ8plex(K)@2	missed K-I@2	-0.00327776	1695.01	566.011	1695.01	566.012	3	14	35.1.1.1043.12	1	12.2067	107078	12.2708	0.869381	3.72416	0.964459	3.5376	0.903164	3.85624	1625.88	39.01	1281.48	36.5	1500.23	39	0
671.34	671.34	81.33	66.47	59.83	P04114	APOB	Apolipoprotein B-100	1	auto	2	99	DLKVEDIPLAR	iTRAQ8plex@N-term; iTRAQ8plex(K)@3	missed K-V@3	-0.000734232	1876.12	626.382	1876.12	626.382	3	11	2.1.1.1206.13	1	13.8335	34340	13.8061	0.843325	4.04201	0.836149	3.97004	1.01054	4.33356	1405.08	36.26	1074.26	33.42	1124.01	33.91	0
671.34	671.34	81.33	66.47	59.83	P04114	APOB	Apolipoprotein B-100	0	auto - discordant peptide type	0	96.47	DNVFDGLVR	iTRAQ8plex@N-term; Dehydrated(D)@1		0.00226551	1319.72	660.865	1319.71	660.864	2	13	52.1.1.1185.14	0	13.8025	86381	13.7748	1.21756	23.4301	1.02251	24.2315	1.19306	24.0795	337.57	56.3	372.62	61.32	330.23	58.05	0
671.34	671.34	81.33	66.47	59.83	P04114	APOB	Apolipoprotein B-100	0	auto - discordant peptide type	0	99	DNVFDGLVR	iTRAQ8plex@N-term; Dehydrated(D)@5		-0.00100895	1319.71	660.864	1319.71	660.864	2	14	58.1.1.1322.17	0	19.0367	98568	18.961	0.631104	19.6033	0.726005	18.1365	0.870966	21.3952	731.2	82.64	418.36	67.01	507.88	72.04	0
671.34	671.34	81.33	66.47	59.83	P04114	APOB	Apolipoprotein B-100	0	auto - discordant peptide type	0	68.8	DNVFDGLVR	iTRAQ8plex@N-term; Trimethyl(R)@9		0.000992442	1379.77	460.932	1379.77	460.931	3	12	70.1.1.1750.6	0	44.1528	43994	44.1377	1.3299	7.15504	0.886968	7.92066	1.50228	7.71608	345.73	18.03	416.84	20.42	293.38	17.49	0
671.34	671.34	81.33	66.47	59.83	P04114	APOB	Apolipoprotein B-100	0	auto - discordant peptide type	0	92.12	DSYDLHDLK	iTRAQ8plex@N-term; Dehydrated(S)@2; iTRAQ8plex(K)@9		-0.00288119	1694.91	565.976	1694.91	565.977	3	11	11.1.1.1133.9	0	11.8495	44548	11.8747	0.605687	19.0263	0.532419	19.4273	1.13982	22.4793	797.76	86.31	438.06	68.56	406.36	65.57	0
671.34	671.34	81.33	66.47	59.83	P04114	APOB	Apolipoprotein B-100	0	auto - discordant peptide type	0	38.79	DSYDLHDLK	iTRAQ8plex@N-term; iTRAQ8plex(S)@2; iTRAQ8plex(K)@9		-0.003693	2017.12	505.288	2017.12	505.288	4	9	9.1.1.1179.8	0	11.6641	67323	11.6459	1.21146	4.90967	1.03506	5.0665	1.17269	5.04092	771.01	26.91	846.8	29.24	763.5	28.04	0
671.34	671.34	81.33	66.47	59.83	P04114	APOB	Apolipoprotein B-100	0	auto - discordant peptide type	0.126098	99	DSYDLHDLK	iTRAQ8plex@N-term; iTRAQ8plex(Y)@3; iTRAQ8plex(K)@9		-0.00993477	2017.11	505.286	2017.12	505.288	4	12	8.1.1.1197.4	0	11.6693	59058	11.6579	0.777998	4.29251	1.0314	3.83928	0.755773	4.35644	1318.25	35.11	929.8	31.3	1300.8	35.97	0
671.34	671.34	81.33	66.47	59.83	P04114	APOB	Apolipoprotein B-100	1	auto	0.00174066	26.3	DYFEK	iTRAQ8plex@N-term; iTRAQ8plex(K)@5		-0.0110483	1308.71	437.243	1308.72	437.246	3	7	35.1.1.1040.4	1	12.0621	28423	11.9641	0.674718	7.05394	0.493346	7.68227	1.37028	8.59355	535.07	22.36	327.3	18.6	252.55	16.28	0
671.34	671.34	81.33	66.47	59.83	P04114	APOB	Apolipoprotein B-100	1	auto	2	99	EFNLQNMGLPDFHIPENLFLK	iTRAQ8plex@N-term; iTRAQ8plex(K)@21		-0.00182212	3123.67	781.924	3123.67	781.924	4	16	2.1.1.1871.3	1	43.7138	145535	43.8187	0.71162	4.99835	0.612947	5.13792	1.16323	5.76168	1028.07	31	663.26	26.44	602.88	25.08	0
671.34	671.34	81.33	66.47	59.83	P04114	APOB	Apolipoprotein B-100	0	auto - discordant peptide type	0	22.7	EFNLQNMGLPDFHIPENLFLK	iTRAQ8plex@N-term; Methyl(H)@13; Deamidated(N)@17; iTRAQ8plex(K)@21		-0.00654348	3138.66	785.673	3138.67	785.674	4	10	3.1.1.1965.6	0	37.8698	23988	37.787	0.546092	10.9394	0.406159	11.9693	1.34713	13.8338	521.77	31.21	258.32	23.66	202.75	21.02	0
671.34	671.34	81.33	66.47	59.83	P04114	APOB	Apolipoprotein B-100	0	auto - discordant peptide type	0	99	EFNLQNMGLPDFHIPENLFLK	iTRAQ8plex@N-term; Oxidation(M)@7; iTRAQ8plex(K)@21		0.0013275	3139.66	785.923	3139.66	785.923	4	13	1.1.1.1744.5	0	38.0014	35073	37.9323	0.439137	14.6962	0.493659	13.4443	0.891278	17.0184	522.28	38.22	207.93	26.5	246.67	27.82	0
671.34	671.34	81.33	66.47	59.83	P04114	APOB	Apolipoprotein B-100	1	auto	0	99	EFQVPTFTIPK	iTRAQ8plex@N-term; iTRAQ8plex(K)@11		-0.0010343	1914.11	639.043	1914.11	639.043	3	14	52.1.1.1449.7	1	25.4898	434615	25.2015	0.811189	17.7335	0.973411	16.3714	0.834961	18.2522	375.16	41.89	275.9	38.01	349.38	41.83	0
671.34	671.34	81.33	66.47	59.83	P04114	APOB	Apolipoprotein B-100	1	auto	0	99	EIFNMAR	iTRAQ8plex@N-term		-0.000177059	1183.63	592.823	1183.63	592.824	2	11	57.1.1.892.14	1	15.8661	40315	15.9272	0.640305	18.4398	0.756172	16.8494	0.848412	19.8864	817.85	87.41	474.76	71.34	591.67	77.07	0
671.34	671.34	81.33	66.47	59.83	P04114	APOB	Apolipoprotein B-100	0	auto - discordant peptide type	0	94.13	EIFNMAR	iTRAQ8plex@N-term; Oxidation(M)@5		-0.000509876	1199.63	600.821	1199.63	600.821	2	11	53.1.1.1142.18	0	11.7829	390637	11.7931	1.27174	2.42123	1.02284	2.54317	1.24575	2.50008	3090.88	53.89	3563.63	59.87	3024.65	56	0
671.34	671.34	81.33	66.47	59.83	P04114	APOB	Apolipoprotein B-100	1	auto	0.0301184	87.64	EIQIYK	iTRAQ8plex@N-term; iTRAQ8plex(K)@6		-0.00124681	1400.85	701.431	1400.85	701.432	2	10	41.1.1.1163.18	1	12.5734	225373	12.4516	0.78945	7.9005	0.566221	8.73502	1.39694	9.47831	382.71	18.92	273.91	16.88	207.32	14.93	0
671.34	671.34	81.33	66.47	59.83	P04114	APOB	Apolipoprotein B-100	1	auto	0	99	EKLTALTK	iTRAQ8plex@N-term; iTRAQ8plex(K)@2; iTRAQ8plex(K)@8	missed K-L@2	-0.00866621	1815.15	606.058	1815.16	606.061	3	13	56.1.1.842.14	1	11.0424	121177	11.0132	0.999326	3.63029	0.981925	3.5904	1.01969	3.75947	2002.74	43.32	1814.59	43.14	1885.4	43.83	229.5
671.34	671.34	81.33	66.47	59.83	P04114	APOB	Apolipoprotein B-100	0	auto - shared MS/MS	0.00174066	25.87	ELIER	iTRAQ8plex@N-term	cleaved H-E@N-term	0.000371763	962.571	482.293	962.57	482.292	2	7	52.1.1.1130.8	0	11.3441	241307	11.371	0.88078	4.24126	1.17901	3.82847	0.748495	4.19827	1246.52	34.16	995.36	32.22	1406.06	37.59	0
671.34	671.34	81.33	66.47	59.83	P04114	APOB	Apolipoprotein B-100	0	auto - discordant peptide type	0	84.54	ENFAGEATLQR	iTRAQ8plex@N-term; Dehydrated(E)@6		-3.25914e-05	1520.79	507.937	1520.79	507.937	3	12	46.1.1.1021.7	0	11.2301	39255	11.2587	0.573841	7.03139	0.72161	6.26731	0.796763	7.62758	611.62	23.9	318.19	18.6	422.25	20.69	0
671.34	671.34	81.33	66.47	59.83	P04114	APOB	Apolipoprotein B-100	0	auto - discordant peptide type	0	58.79	ENLCLNLHK	iTRAQ8plex@N-term; Deamidated(N)@2; Methylthio(C)@4; iTRAQ8plex(K)@9		0.0139442	1737.95	580.324	1737.94	580.32	3	9	63.1.1.1230.9	0	20.6264	16157	20.9239	1.19291	27.4794	1.5936	25.2529	0.750012	25.2895	249.24	48.37	269.55	52.44	380	61.4	0
671.34	671.34	81.33	66.47	59.83	P04114	APOB	Apolipoprotein B-100	0	auto - discordant peptide type	0	96.86	ENLCLNLHK	iTRAQ8plex@N-term; Methylthio(C)@4; Deamidated(N)@6; iTRAQ8plex(K)@9		0.0133547	1737.95	580.324	1737.94	580.32	3	11	61.1.1.1009.11	0	21.0785	9273	21.1005	2.21729	21.4622	1.52966	23.0494	1.45233	19.5755	311.31	54.31	625.79	78.23	455.59	68.63	0
671.34	671.34	81.33	66.47	59.83	P04114	APOB	Apolipoprotein B-100	1	auto	0	99	ENLCLNLHK	iTRAQ8plex@N-term; Methylthio(C)@4; iTRAQ8plex(K)@9		-0.00456384	1736.95	579.99	1736.95	579.992	3	12	62.1.1.1234.15	1	20.959	111182	21.1104	0.829386	16.8624	0.952311	15.8286	0.872606	17.4921	817.51	87.46	614.7	80.12	744.83	86.89	0
671.34	671.34	81.33	66.47	59.83	P04114	APOB	Apolipoprotein B-100	0	auto - discordant peptide type	0	43.94	EQHLFLPF	iTRAQ8plex@N-term	cleaved F-S@C-term	-2.58937e-05	1333.73	667.874	1333.73	667.874	2	10	45.1.1.1849.8	0	48.1618	300529	48.3215	1.36582	11.2101	1.18712	11.5193	1.15276	11.102	139.31	11.45	172.5	13.15	158.22	12.77	0
671.34	671.34	81.33	66.47	59.83	P04114	APOB	Apolipoprotein B-100	0	auto - discordant peptide type	0	98.34	EQHLFLPFSYK	iTRAQ8plex@N-term; Deamidated(Q)@2; iTRAQ8plex(K)@11		0.0176034	2017.13	673.384	2017.11	673.378	3	12	61.1.1.1271.17	0	32.8873	19168	33.0863	1.39059	4.998	1.13454	5.23148	1.22806	5.0261	694.27	25.55	875.27	29.6	753.59	28.02	0
671.34	671.34	81.33	66.47	59.83	P04114	APOB	Apolipoprotein B-100	1	auto	0	99	EQHLFLPFSYK	iTRAQ8plex@N-term; iTRAQ8plex(K)@11		0.000190236	2016.13	673.051	2016.13	673.05	3	13	58.1.1.1373.17	1	21.2878	121547	21.4329	0.723483	5.98767	1.64293	4.64902	0.441215	5.61228	719.89	25.94	472.18	22.58	1131.54	33.24	0
671.34	671.34	81.33	66.47	59.83	P04114	APOB	Apolipoprotein B-100	0	auto - discordant peptide type	0	83.18	EQHLFLPFSYK	iTRAQ8plex@N-term; Methyl(H)@3; iTRAQ8plex(K)@11		-0.00142788	2030.14	508.543	2030.15	508.544	4	11	63.1.1.1500.7	0	32.774	14894	32.6165	2.85416	31.2371	2.99311	30.8617	0.955423	23.0343	136.41	36.06	352.97	58.74	390.62	62.21	0
671.34	671.34	81.33	66.47	59.83	P04114	APOB	Apolipoprotein B-100	0	auto - discordant peptide type	0	67.3	EQHLFLPFSYK	iTRAQ8plex@N-term; Methyl(L)@6; iTRAQ8plex(K)@11		-0.00296667	2030.14	508.543	2030.15	508.544	4	11	62.1.1.1495.5	0	32.6856	14971	32.6714	3.58027	30.1331	3.96136	29.6599	0.905548	20.1033	138.66	36.47	450.07	66.18	525.51	72.04	0
671.34	671.34	81.33	66.47	59.83	P04114	APOB	Apolipoprotein B-100	0	auto - discordant peptide type	0	89.24	ESGLEAHVALK	Glu->pyro-Glu@N-term; iTRAQ8plex(K)@11	cleaved H-E@N-term	-0.0014072	1438.81	480.61	1438.81	480.61	3	11	22.1.1.1104.7	0	14.4882	23404	14.471	0.81435	29.9566	1.13445	26.5696	0.719229	29.859	262.92	49.6	194.11	45.17	285.36	53.39	0
671.34	671.34	81.33	66.47	59.83	P04114	APOB	Apolipoprotein B-100	0	auto - shared MS/MS	0.00305075	40.69	ESMLK	iTRAQ8plex@N-term; iTRAQ8plex(K)@5		-0.00260178	1214.71	405.912	1214.72	405.912	3	8	41.1.1.1137.2	0	11.3892	528611	11.4261	0.781497	1.40601	0.705534	1.42273	1.10981	1.57064	12193.2	106.79	8638.88	95.02	8230.38	92.28	0
671.34	671.34	81.33	66.47	59.83	P04114	APOB	Apolipoprotein B-100	0	auto - discordant peptide type	0	21.66	ESQLPTVMDFR	iTRAQ8plex@N-term; Dehydrated(D)@9		0.0025945	1607.83	536.951	1607.83	536.95	3	9	60.1.1.1387.4	0	21.6544	24796	21.6008	1.76749	30.09	1.84192	29.6099	0.96145	26.257	172.71	40.37	276.75	52.44	304.35	55.32	0
671.34	671.34	81.33	66.47	59.83	P04114	APOB	Apolipoprotein B-100	0	auto - discordant peptide type	0	99	ESQLPTVMDFR	iTRAQ8plex@N-term; Trimethyl(R)@11		0.00154448	1667.89	556.97	1667.89	556.969	3	13	71.1.1.1875.10	0	49.7369	22005	49.6719	1.26469	29.9944	1.21496	30.0395	1.04294	29.5524	101.12	21.79	115.94	24.19	117.54	24.6	0
671.34	671.34	81.33	66.47	59.83	P04114	APOB	Apolipoprotein B-100	1	auto	0.00744648	63.04	ESQLPTVMDFRK	iTRAQ8plex@N-term; iTRAQ8plex(K)@12	missed R-K@11	0.00164207	2058.14	515.543	2058.14	515.542	4	10	40.1.1.1232.10	1	15.7047	19467	15.7283	1.2591	18.5013	1.07627	19.06	1.17215	18.7772	532.24	70.71	607.55	78.23	548.04	74.9	0
671.34	671.34	81.33	66.47	59.83	P04114	APOB	Apolipoprotein B-100	0	auto - discordant peptide type	0	99	EVGTVLSQVYSK	iTRAQ8plex@N-term; Dehydrated(E)@1; iTRAQ8plex(K)@12		0.00258949	1899.1	634.039	1899.09	634.038	3	14	67.1.1.1384.20	0	28.1168	39309	28.1237	1.60543	22.4601	1.57166	22.3609	1.02346	20.4972	322.59	55.14	469.52	68.41	485.06	69.93	0
671.34	671.34	81.33	66.47	59.83	P04114	APOB	Apolipoprotein B-100	0	auto - discordant peptide type	0	24.52	EVGTVLSQVYSK	iTRAQ8plex@N-term; Dehydrated(T)@4; Deamidated(Q)@8; iTRAQ8plex(K)@12		0.0127045	1900.09	634.37	1900.08	634.366	3	10	68.1.1.1384.17	0	28.0888	22669	28.1468	1.09122	24.586	0.929867	25.318	1.1758	25.8546	325.16	55.23	321.68	57.18	289.27	54.31	0
671.34	671.34	81.33	66.47	59.83	P04114	APOB	Apolipoprotein B-100	1	auto	0	99	EVGTVLSQVYSK	iTRAQ8plex@N-term; iTRAQ8plex(K)@12		-0.00131145	1917.1	480.283	1917.1	480.283	4	14	45.1.1.1578.4	1	35.9713	61766	35.5463	1.06359	9.62617	1.53157	8.64002	0.695789	8.9802	216.47	14.25	208.73	14.66	317.19	17.75	0
671.34	671.34	81.33	66.47	59.83	P04114	APOB	Apolipoprotein B-100	0	auto - discordant peptide type	0	27.42	EVYGFNPEGK	iTRAQ8plex@N-term; iTRAQ8plex(Y)@3; iTRAQ8plex(K)@10		-0.00514998	2051.14	513.792	2051.15	513.794	4	9	28.1.1.1083.8	0	13.5194	17731	13.5924	0.698783	19.9742	0.749551	19.0219	0.934074	21.7905	653.72	78.17	414.14	66.26	468.79	69.35	0
671.34	671.34	81.33	66.47	59.83	P04114	APOB	Apolipoprotein B-100	0	auto - discordant peptide type	0	92.51	EYSGTIASEANTYLNSK	iTRAQ8plex@N-term; Dehydrated(S)@8; iTRAQ8plex(K)@17		-0.00194878	2437.26	610.322	2437.26	610.322	4	13	37.1.1.1198.17	0	13.7049	19258	13.671	1.81107	20.5574	1.19412	22.5906	1.51959	20.3991	365.41	58.74	599.97	76.88	417.46	66.26	0
671.34	671.34	81.33	66.47	59.83	P04114	APOB	Apolipoprotein B-100	0	auto - discordant peptide type	0	64.23	EYSGTIASEANTYLNSK	iTRAQ8plex@N-term; Dehydrated(T)@12; iTRAQ8plex(K)@17		-0.00194878	2437.26	610.322	2437.26	610.322	4	12	37.1.1.1198.16	0	13.7033	19258	13.671	1.22432	25.1043	0.864974	27.4466	1.41819	27.2415	292.82	52.44	325.02	57.18	242.32	50.4	0
671.34	671.34	81.33	66.47	59.83	P04114	APOB	Apolipoprotein B-100	0	auto - discordant peptide type	0	71.85	EYSGTIASEANTYLNSK	iTRAQ8plex@N-term; Dehydrated(T)@5; iTRAQ8plex(K)@17		0.00103888	2437.26	610.322	2437.26	610.322	4	12	39.1.1.1188.15	0	13.6208	20202	13.5905	0.911096	22.9935	1.24264	20.6486	0.734614	22.4539	415.39	62.37	343.11	59.75	493.84	70	0
671.34	671.34	81.33	66.47	59.83	P04114	APOB	Apolipoprotein B-100	0	auto - discordant peptide type	0	76	FDHTNSLNIAGLSLDFSSK	iTRAQ8plex@N-term; Dehydrated(S)@17; iTRAQ8plex(K)@19		-0.0013917	2655.41	664.86	2655.41	664.86	4	11	62.1.1.1857.14	0	49.0441	24243	48.9233	0.908462	24.7282	0.999646	23.5745	0.910543	25.4001	358.8	57.97	295.51	55.32	343.15	58.91	0
671.34	671.34	81.33	66.47	59.83	P04114	APOB	Apolipoprotein B-100	1	auto	0	99	FDHTNSLNIAGLSLDFSSK	iTRAQ8plex@N-term; iTRAQ8plex(K)@19		0.00104308	2673.42	669.363	2673.42	669.363	4	18	12.1.1.1520.9	1	28.2461	28872	28.2713	1.28723	25.3235	0.586309	32.0834	2.19973	31.6113	279.89	51.28	326.63	57.1	157	41.35	0
671.34	671.34	81.33	66.47	59.83	P04114	APOB	Apolipoprotein B-100	0	auto - discordant peptide type	0	39.16	FFGEGTK	iTRAQ8plex@N-term; Dehydrated(T)@6; iTRAQ8plex(K)@7		-0.00313315	1374.77	459.265	1374.78	459.266	3	10	49.1.1.667.7	0	14.8754	112242	14.8146	0.728753	7.26909	0.905164	6.60642	0.806666	7.58614	480.26	21.19	317.3	18.33	415.9	20.45	0
671.34	671.34	81.33	66.47	59.83	P04114	APOB	Apolipoprotein B-100	1	auto	0	99	FFGEGTK	iTRAQ8plex@N-term; iTRAQ8plex(K)@7		-0.00352368	1392.78	697.399	1392.79	697.4	2	12	49.1.1.666.19	1	14.8504	385410	14.8146	0.95445	2.1556	0.862968	2.18675	1.10815	2.30884	4571.78	65.44	3955.96	63.76	3774.55	62.4	0
671.34	671.34	81.33	66.47	59.83	P04114	APOB	Apolipoprotein B-100	1	auto	0	99	FFGEGTKK	iTRAQ8plex@N-term; iTRAQ8plex(K)@7; iTRAQ8plex(K)@8	missed K-K@7	-0.00402927	1825.08	913.549	1825.09	913.551	2	11	63.1.1.1023.21	1	11.4158	38097	11.3756	0.738128	28.2246	1.08245	24.4492	0.683228	28.3483	316.58	54.41	211.85	47.43	327.85	57.01	0
671.34	671.34	81.33	66.47	59.83	P04114	APOB	Apolipoprotein B-100	1	auto	0.00568285	56.31	FIAESK	iTRAQ8plex@N-term; iTRAQ8plex(K)@6		-0.00319305	1301.78	434.933	1301.78	434.934	3	9	44.1.1.1037.3	1	11.9087	724796	11.8563	1.1078	1.36057	0.92384	1.41474	1.20145	1.43896	10528.3	99.38	10573.8	103.61	9305.49	98.06	0
671.34	671.34	81.33	66.47	59.83	P04114	APOB	Apolipoprotein B-100	1	auto	0.25649	98.76	FIIPGLK	iTRAQ8plex@N-term; iTRAQ8plex(K)@7		-0.00399435	1394.91	698.461	1394.91	698.463	2	12	83.1.1.1484.16	1	34.9137	57851	34.8786	1.48659	13.0628	1.26794	13.4726	1.17472	12.6938	492.9	48.17	664.3	57.58	597.92	55.45	0
671.34	671.34	81.33	66.47	59.83	P04114	APOB	Apolipoprotein B-100	1	auto	0.015923	78.52	FIIPSPK	iTRAQ8plex@N-term; iTRAQ8plex(K)@7		-0.00330756	1408.89	470.636	1408.89	470.637	3	10	81.1.1.1244.9	1	22.2749	630997	22.3891	0.911128	1.59655	0.780507	1.64536	1.16962	1.75217	8567.33	89.57	7076.82	85.39	6397.46	81.28	0
671.34	671.34	81.33	66.47	59.83	P04114	APOB	Apolipoprotein B-100	1	auto	0.00174066	29.96	FKPIR	iTRAQ8plex@N-term; iTRAQ8plex(K)@2		-0.00227526	1267.82	423.614	1267.82	423.615	3	8	82.1.1.994.5	1	10.2854	64947	10.2256	0.883963	4.27677	0.899795	4.1618	0.984308	4.49953	1218.71	33.78	976.67	31.81	1049.13	32.57	0
671.34	671.34	81.33	66.47	59.83	P04114	APOB	Apolipoprotein B-100	1	auto	0	98.91	FLDMLIK	iTRAQ8plex@N-term; iTRAQ8plex(K)@7		-0.00296983	1486.9	744.458	1486.9	744.459	2	12	66.1.1.1372.15	1	31.8098	203462	31.8688	1.37819	23.1488	1.27993	23.355	1.07886	22.4323	325.38	55.32	406.55	63.87	398.44	63.8	0
671.34	671.34	81.33	66.47	59.83	P04114	APOB	Apolipoprotein B-100	0	auto - discordant peptide type	0	54.17	FLDMLIK	iTRAQ8plex@N-term; Oxidation(M)@4; iTRAQ8plex(K)@7		-0.00335921	1502.9	501.973	1502.9	501.974	3	9	56.1.1.1585.6	0	44.0476	46073	44.4025	2.00525	24.5609	1.46921	26.1229	1.36749	22.7563	246.36	48.27	447.87	66.33	346.29	59.83	0
671.34	671.34	81.33	66.47	59.83	P04114	APOB	Apolipoprotein B-100	0	auto - shared MS/MS	0.00744648	73.82	FLDMLIKK	iTRAQ8plex@N-term; iTRAQ8plex(K)@7; iTRAQ8plex(K)@8	missed K-K@7	-0.0326127	1919.17	480.8	1919.2	480.808	4	8	72.1.1.1810.3	0	46.8685	8379	46.9489	1.12191	30.6216	1.12	30.1695	1.00365	30.6622	206.77	44.05	210.31	46.26	221.56	47.33	0
671.34	671.34	81.33	66.47	59.83	P04114	APOB	Apolipoprotein B-100	0	auto - discordant peptide type	0	35.83	FLDSNIK	iTRAQ8plex@N-term; Deamidated(N)@5; iTRAQ8plex(K)@7		0.0153544	1444.85	482.625	1444.84	482.62	3	9	47.1.1.859.5	0	17.2557	52164	17.4631	1.55557	3.92246	1.1305	4.21985	1.37867	3.94802	1070.11	31.75	1509.15	38.72	1157.4	34.73	0
671.34	671.34	81.33	66.47	59.83	P04114	APOB	Apolipoprotein B-100	1	auto	0.747147	99	FLDSNIK	iTRAQ8plex@N-term; iTRAQ8plex(K)@7		-0.00293547	1443.85	482.291	1443.85	482.292	3	12	48.1.1.756.5	1	17.3892	442721	17.5962	1.03348	2.40696	0.769917	2.59698	1.34492	2.67791	3494.37	57.24	3274.03	57.74	2573.94	51.87	0
671.34	671.34	81.33	66.47	59.83	P04114	APOB	Apolipoprotein B-100	0	auto - discordant peptide type	0	99	FLSPSAQQASWQVSAR	iTRAQ8plex@N-term	cleaved L-F@N-term	0.0012621	2066.09	689.703	2066.09	689.702	3	13	67.1.1.1359.20	0	26.9803	30511	26.9417	0.098525	18.8152	0.260045	9.44757	0.37961	20.2796	580.93	23.24	51.89	9.54	144.53	12.37	0
671.34	671.34	81.33	66.47	59.83	P04114	APOB	Apolipoprotein B-100	0	auto - discordant peptide type	0	64.53	FQFPGK	iTRAQ8plex@N-term; iTRAQ8plex(K)@6	cleaved K-P@C-term	-0.00293803	1330.78	666.399	1330.79	666.4	2	10	76.1.1.1164.16	0	18.0235	20779	18.0724	1.10618	28.2772	1.4657	25.9587	0.75617	26.6093	122.58	23.98	122.93	25.1	171.89	29.33	0
671.34	671.34	81.33	66.47	59.83	P04114	APOB	Apolipoprotein B-100	0	auto - discordant peptide type	0	97.48	FQFPGKPGIYTR	iTRAQ8plex@N-term; Deamidated(Q)@2; iTRAQ8plex(K)@6		0.00204696	2019.14	505.793	2019.14	505.792	4	12	68.1.1.1243.6	0	21.795	58580	21.8717	0.842366	5.41267	0.846382	5.27742	0.997182	5.76947	784.29	27.09	598.95	24.96	635.08	25.34	0
671.34	671.34	81.33	66.47	59.83	P04114	APOB	Apolipoprotein B-100	1	auto	0	99	FQFPGKPGIYTR	iTRAQ8plex@N-term; iTRAQ8plex(K)@6		0.000789068	2018.16	1010.09	2018.16	1010.09	2	13	83.1.1.1089.10	1	17.5869	21568	17.461	0.765125	28.9677	0.887998	26.9315	0.863298	30.4108	87.68	15.68	60.82	13.86	74.49	15	0
671.34	671.34	81.33	66.47	59.83	P04114	APOB	Apolipoprotein B-100	0	auto - discordant peptide type	0	69.95	FRETLEDTR	iTRAQ8plex@N-term; Dehydrated(T)@8	missed R-E@2	0.00814323	1451.78	484.933	1451.77	484.93	3	11	41.1.1.1143.7	0	11.6676	68168	11.6962	2.81428	5.87378	3.04973	5.78111	0.924584	4.3275	387.33	19.21	988.24	31.1	1130.13	33.57	0
671.34	671.34	81.33	66.47	59.83	P04114	APOB	Apolipoprotein B-100	0	auto - discordant peptide type	0	45.59	FRHVGSK	iTRAQ8plex@N-term; iTRAQ8plex(K)@7	cleaved T-F@N-term; missed R-H@2	0.00279027	1437.87	719.942	1437.87	719.941	2	9	62.1.1.984.21	0	9.7793	32479	9.7846	1.1792	6.28567	1.33816	5.9959	0.882919	6.01713	478.3	21.19	511.33	22.8	612.34	24.74	0
671.34	671.34	81.33	66.47	59.83	P04114	APOB	Apolipoprotein B-100	1	auto	0	95.79	FSHVEK	iTRAQ8plex@N-term; iTRAQ8plex(K)@6		-0.0032698	1353.78	452.268	1353.79	452.269	3	10	44.1.1.962.10	1	8.5693	68864	8.5486	1.26765	4.12631	1.21901	4.11567	1.04191	4.04536	1067.59	31.67	1226.92	35.19	1245.08	35.52	0
671.34	671.34	81.33	66.47	59.83	P04114	APOB	Apolipoprotein B-100	1	auto	0.09691	96.12	FSLDGK	iTRAQ8plex@N-term; iTRAQ8plex(K)@6		-0.00252873	1273.75	425.589	1273.75	425.59	3	10	43.1.1.1085.2	1	13.9995	39756	14.0804	0.663871	16.9819	0.68986	16.2778	0.964191	18.8163	937.54	93.59	564.27	77.52	618.78	79.56	0
671.34	671.34	81.33	66.47	59.83	P04114	APOB	Apolipoprotein B-100	0	auto - discordant peptide type	0	99	FSVPAGIVIPSFQAL	iTRAQ8plex@N-term	cleaved L-T@C-term	0.000341952	1849.07	617.363	1849.07	617.362	3	14	71.1.1.2321.6	0	69.7677	97964	69.7541	1.39592	9.72054	1.76871	9.14543	0.790759	8.71196	183.93	13.15	232.77	15.33	311.24	17.75	0
671.34	671.34	81.33	66.47	59.83	P04114	APOB	Apolipoprotein B-100	1	auto	0	99	FSVPAGIVIPSFQALTAR	iTRAQ8plex@N-term		0.00283473	2177.25	726.759	2177.25	726.758	3	19	86.1.1.2335.18	1	69.0595	91835	69.2978	0.606803	30.5127	2.34788	20.6315	0.258948	27.8303	32.12	5.48	17.67	4.47	72.15	8.37	0
671.34	671.34	81.33	66.47	59.83	P04114	APOB	Apolipoprotein B-100	0	auto - discordant peptide type	0	99	FSVPAGIVIPSFQALTAR	iTRAQ8plex@N-term; Acetyl(S)@11		0.00303785	2219.27	740.762	2219.26	740.761	3	20	84.1.1.2216.18	0	69.5887	132574	69.599	1.41015	5.94778	1.09728	6.29338	1.28763	6.02841	486.86	21.4	622.42	24.94	511.1	23.02	0
671.34	671.34	81.33	66.47	59.83	P04114	APOB	Apolipoprotein B-100	0	auto - discordant peptide type	0	99	FSVPAGIVIPSFQALTAR	iTRAQ8plex@N-term; Acetyl(S)@2		0.000390332	2219.26	740.761	2219.26	740.761	3	18	83.1.1.2258.19	0	69.4781	185675	69.5324	1.67303	9.91968	1.34948	10.3484	1.24216	9.44736	162.26	12.37	246.11	15.62	209.49	14.66	0
671.34	671.34	81.33	66.47	59.83	P04114	APOB	Apolipoprotein B-100	0	auto - discordant peptide type	0	99	FSVPAGIVIPSFQALTAR	iTRAQ8plex@N-term; Deamidated(Q)@13		0.000480981	2178.24	727.086	2178.24	727.086	3	20	63.1.1.2322.17	0	69.6636	374235	69.5393	0.939504	11.1665	1.31266	9.97733	0.717108	10.7649	172.95	12.73	147.31	12.37	217.2	14.63	0
671.34	671.34	81.33	66.47	59.83	P04114	APOB	Apolipoprotein B-100	0	auto - discordant peptide type	0	99	FSVPAGIVIPSFQALTAR	iTRAQ8plex@N-term; iTRAQ8plex(S)@11		-0.00202783	2481.45	621.371	2481.46	621.372	4	16	84.1.1.1885.14	0	54.8972	40021	54.9141	0.828793	27.7746	1.67898	22.5356	0.494584	25.7811	304.56	53.39	228.84	49.3	489.22	69.28	0
671.34	671.34	81.33	66.47	59.83	P04114	APOB	Apolipoprotein B-100	0	auto - discordant peptide type	0	99	FSVPAGIVIPSFQALTAR	iTRAQ8plex@N-term; iTRAQ8plex(S)@2		0.000413611	2481.46	621.372	2481.46	621.372	4	15	84.1.1.1925.15	0	56.7028	29247	56.718	1.41989	23.0267	1.29572	23.2984	1.09796	22.194	324.19	55.23	417.32	64.65	401.88	63.87	0
671.34	671.34	81.33	66.47	59.83	P04114	APOB	Apolipoprotein B-100	0	auto - discordant peptide type	0	19.69	FTDLH	iTRAQ8plex@N-term	cleaved A-F@N-term; cleaved H-L@C-term	-0.00123804	935.501	468.758	935.502	468.758	2	7	28.1.1.1108.3	0	14.6099	77604	14.5983	0.495374	5.54307	0.300202	6.66366	1.65333	7.62438	1097.63	32	492.95	23.24	315.25	18.89	0
671.34	671.34	81.33	66.47	59.83	P04114	APOB	Apolipoprotein B-100	1	auto	0	99	FVTQAEGAK	iTRAQ8plex@N-term; iTRAQ8plex(K)@9		-0.00311284	1557.89	520.305	1557.9	520.306	3	14	42.1.1.1149.11	1	11.9443	985988	11.7429	0.839348	4.33861	0.909741	4.14017	0.92441	4.54775	1224.55	33.85	931.82	31.16	1065.81	32.85	0
671.34	671.34	81.33	66.47	59.83	P04114	APOB	Apolipoprotein B-100	1	auto	0	45.37	GAVDHK	iTRAQ8plex@N-term; iTRAQ8plex(K)@6		-0.00256704	1233.73	412.25	1233.73	412.25	3	7	53.1.1.1020.2	1	6.3073	4152	6.2485	1.08751	25.6935	1.06992	25.424	1.01841	26.0461	59.7	10.58	58.86	10.95	61.11	11.14	0
671.34	671.34	81.33	66.47	59.83	P04114	APOB	Apolipoprotein B-100	1	auto	0.000869459	18.58	GAYQNNEIK	iTRAQ8plex@N-term; iTRAQ8plex(K)@9		-0.00030171	1643.91	548.977	1643.91	548.977	3	8	32.1.1.1136.17	1	10.637	885804	10.5602	0.873854	2.80223	0.726018	2.92041	1.20596	3.13362	2853.18	51.68	2260.38	48.33	1981.81	45.4	0
671.34	671.34	81.33	66.47	59.83	P04114	APOB	Apolipoprotein B-100	1	auto	0	99	GAYQNNEIKHIYAISSAALSASYKADTVAK	iTRAQ8plex@N-term; iTRAQ8plex(K)@9; iTRAQ8plex(K)@24; iTRAQ8plex(K)@30	missed K-H@9; missed K-A@24	0.00469445	4400.45	734.415	4400.44	734.414	6	14	45.1.1.1841.11	1	47.8219	8505	47.967	2.10618	28.5146	1.4621	30.6999	1.44331	26.4729	89.79	20.62	171.45	28.98	125.6	25.59	0
671.34	671.34	81.33	66.47	59.83	P04114	APOB	Apolipoprotein B-100	1	auto	0	99	GFEPTLEALFGK	iTRAQ8plex@N-term; iTRAQ8plex(K)@12		-0.00233237	1916.08	639.702	1916.09	639.703	3	13	6.1.1.2252.3	1	65.531	3604	65.5937	0.738675	28.1162	1.3879	22.8669	0.533258	27.0217	32.09	5.48	21.49	4.8	42.61	6.48	0
671.34	671.34	81.33	66.47	59.83	P04114	APOB	Apolipoprotein B-100	0	auto - shared MS/MS	0.00130484	23.72	GIIK	iTRAQ8plex@N-term; iTRAQ8plex(K)@4	cleaved S-G@N-term	-0.00536901	1037.7	519.857	1037.71	519.86	2	6	76.1.1.984.9	0	10.032	30237	9.9268	0.796654	24.6961	0.888921	23.275	0.897938	25.9494	391.24	60.5	282.57	54.41	332.73	57.88	0
671.34	671.34	81.33	66.47	59.83	P04114	APOB	Apolipoprotein B-100	0	auto - shared MS/MS	0.00436481	50.15	GLTLR	iTRAQ8plex@N-term	cleaved T-G@N-term	-0.00157756	862.553	432.284	862.554	432.284	2	8	83.1.1.931.10	0	10.5297	34372	10.461	2.23123	18.0034	1.98829	18.2826	1.12436	15.1548	442.12	64.73	894.33	93.7	841.02	92.09	0
671.34	671.34	81.33	66.47	59.83	P04114	APOB	Apolipoprotein B-100	1	auto	0	99	GMALFGEGK	iTRAQ8plex@N-term; iTRAQ8plex(K)@9		-0.00475029	1516.85	506.623	1516.85	506.625	3	12	48.1.1.777.9	1	18.3212	915267	18.4352	1.17166	3.48828	1.18633	3.43301	0.98955	3.44869	1556.43	38.22	1653.28	40.96	1766.53	42.38	0
671.34	671.34	81.33	66.47	59.83	P04114	APOB	Apolipoprotein B-100	0	auto - discordant peptide type	0	99	GMALFGEGK	iTRAQ8plex@N-term; Oxidation(M)@2; iTRAQ8plex(K)@9		-0.00378224	1532.84	767.429	1532.85	767.431	2	15	42.1.1.1156.20	0	12.2689	37090	12.2758	1.365	23.6034	0.944118	25.8765	1.4486	25.0466	313.72	54.31	388.23	62.29	283.37	54.5	0
671.34	671.34	81.33	66.47	59.83	P04114	APOB	Apolipoprotein B-100	0	auto - discordant peptide type	0	99	GMTRPLSTLISSSQSCQYTLDAK	iTRAQ8plex@N-term; Methylthio(C)@16; Deamidated(Q)@17; iTRAQ8plex(K)@23		-0.000595483	3141.6	786.406	3141.6	786.406	4	13	27.1.1.1958.8	0	52.764	9606	52.8595	1.19105	27.4344	0.738647	31.1842	1.6156	31.1406	74.56	14.49	80.51	15.59	52.69	12.85	0
671.34	671.34	81.33	66.47	59.83	P04114	APOB	Apolipoprotein B-100	0	auto - discordant peptide type	0	56.67	GMTRPLSTLISSSQSCQYTLDAK	iTRAQ8plex@N-term; Methylthio(C)@16; Dehydrated(D)@21; iTRAQ8plex(K)@23		0.00233344	3122.6	781.658	3122.6	781.658	4	11	71.1.1.1846.7	0	48.4937	9881	48.4555	1.87003	28.3323	1.87929	28.1133	0.996999	24.5049	38.11	8.49	64.61	11.31	68.52	11.75	0
671.34	671.34	81.33	66.47	59.83	P04114	APOB	Apolipoprotein B-100	0	auto - discordant peptide type	0	99	GMTRPLSTLISSSQSCQYTLDAK	iTRAQ8plex@N-term; Methylthio(C)@16; iTRAQ8plex(K)@23		-1.00996	3139.6	628.928	3140.61	629.13	5	14	25.1.1.1950.3	0	52.3589	2719	52.4666	0.68787	27.5578	1.71956	20.738	0.400801	25.7095	35.31	5.74	22.02	4.9	58.09	7.48	0
671.34	671.34	81.33	66.47	59.83	P04114	APOB	Apolipoprotein B-100	0	auto - discordant peptide type	0	99	GMTRPLSTLISSSQSCQYTLDAK	iTRAQ8plex@N-term; Oxidation(M)@2; Methylthio(C)@16; iTRAQ8plex(K)@23		0.00336753	3156.61	790.16	3156.61	790.159	4	13	50.1.1.1655.20	0	39.7103	27191	39.7172	2.11774	30.0465	1.82401	30.7302	1.16328	25.9853	161.61	39.12	310.28	55.23	282.02	53.39	0
671.34	671.34	81.33	66.47	59.83	P04114	APOB	Apolipoprotein B-100	1	auto	0	99	GTYGLSCQR	iTRAQ8plex@N-term; Methylthio(C)@7		-0.00380903	1333.64	445.553	1333.64	445.555	3	12	73.1.1.1155.8	1	12.5106	320486	12.4936	1.17991	2.92009	1.16866	2.88802	1.01159	2.89536	2212.5	45.57	2366.72	48.99	2473.75	50.08	0
671.34	671.34	81.33	66.47	59.83	P04114	APOB	Apolipoprotein B-100	0	auto - discordant peptide type	0	99	GTYGLSCQR	iTRAQ8plex@N-term; Methylthio(C)@7; Deamidated(Q)@8		-0.0186673	1334.61	668.311	1334.63	668.321	2	13	47.1.1.745.17	0	12.2715	14721	12.2835	0.890915	23.4763	0.939739	22.64	0.949881	24.4672	402.65	61.4	325.22	58.05	362.01	60.58	0
671.34	671.34	81.33	66.47	59.83	P04114	APOB	Apolipoprotein B-100	1	auto	0.273273	98.86	GVISIPR	iTRAQ8plex@N-term		-0.000905931	1044.66	523.337	1044.66	523.337	2	11	82.1.1.1058.14	1	13.1658	27042	13.1363	1.00886	5.19513	0.916078	5.25565	1.10342	5.47758	761.76	26.72	696.73	26.7	667.63	26.13	0
671.34	671.34	81.33	66.47	59.83	P04114	APOB	Apolipoprotein B-100	0	auto - discordant peptide type	0.177178	99	HDAHLNGK	iTRAQ8plex@N-term; Deamidated(N)@6; iTRAQ8plex(K)@8		0.000867741	1499.83	500.951	1499.83	500.951	3	10	19.1.1.898.12	0	5.2352	13800	5.2555	1.74483	6.73837	1.27555	7.21199	1.37055	6.53995	345.5	18.06	546.53	23.24	421.63	20.95	0
671.34	671.34	81.33	66.47	59.83	P04114	APOB	Apolipoprotein B-100	1	auto	0	99	HINIDQFVR	iTRAQ8plex@N-term		0.000889004	1444.81	723.412	1444.81	723.412	2	13	56.1.1.900.9	1	13.6206	77002	13.5952	0.646568	23.0269	0.70162	21.6781	0.923321	25.317	260.11	34.86	152.47	28.55	174.6	29.75	0
671.34	671.34	81.33	66.47	59.83	P04114	APOB	Apolipoprotein B-100	0	auto - discordant peptide type	0	99	HINIDQFVR	iTRAQ8plex@N-term; Deamidated(N)@3		-0.00089297	1445.79	482.938	1445.79	482.938	3	13	12.1.1.1235.3	0	15.4668	91916	15.366	0.932415	6.8685	0.886146	6.8475	1.05425	7.28435	456.95	20.69	386.27	19.95	387.4	19.9	0
671.34	671.34	81.33	66.47	59.83	P04114	APOB	Apolipoprotein B-100	0	auto - discordant peptide type	0	99	HINIDQFVR	iTRAQ8plex@N-term; Deamidated(Q)@6		-0.00089297	1445.79	482.938	1445.79	482.938	3	11	12.1.1.1231.2	0	15.287	91916	15.366	1.09714	14.6422	1.02661	14.7073	1.07078	15.0207	457.33	46.31	454.89	48.11	449.18	47.91	0
671.34	671.34	81.33	66.47	59.83	P04114	APOB	Apolipoprotein B-100	0	auto - discordant peptide type	0	61.45	HINIDQFVR	iTRAQ8plex@N-term; Trimethyl(R)@9		0.00177735	1486.86	496.627	1486.86	496.626	3	12	86.1.1.1526.10	0	32.6745	29885	32.6981	0.85143	8.63012	0.653508	9.27069	1.30538	9.95873	305.57	16.91	235.87	15.62	191.05	14.21	0
671.34	671.34	81.33	66.47	59.83	P04114	APOB	Apolipoprotein B-100	0	auto - discordant peptide type	0	99	HIPSFTIDFVEMK	iTRAQ8plex@N-term; iTRAQ8plex(K)@13	cleaved F-H@N-term	0.000805718	2171.19	543.805	2171.19	543.805	4	11	10.1.1.1498.3	0	27.226	44796	27.2145	0.73655	16.6583	0.567672	17.8638	1.3	19.736	451.35	45.93	301.39	39.75	245.13	35.99	0
671.34	671.34	81.33	66.47	59.83	P04114	APOB	Apolipoprotein B-100	0	auto - discordant peptide type	0	99	HIQNIDIQHLAGK	iTRAQ8plex@N-term; Deamidated(Q)@3; iTRAQ8plex(K)@13		-0.0015193	2095.2	524.807	2095.2	524.807	4	15	25.1.1.1148.6	0	16.5457	96218	16.3998	1.26853	5.56986	1.45254	5.31842	0.87501	5.22298	586.48	23.47	674.48	26.13	815.02	28.55	0
671.34	671.34	81.33	66.47	59.83	P04114	APOB	Apolipoprotein B-100	0	auto - discordant peptide type	0	99	HIQNIDIQHLAGK	iTRAQ8plex@N-term; Deamidated(Q)@8; iTRAQ8plex(K)@13		-0.000165849	2095.2	524.807	2095.2	524.807	4	17	22.1.1.1166.3	0	17.2304	91497	17.2961	1.02705	7.89535	0.911722	8.05757	1.12867	8.35507	652.83	34.99	607.86	35.24	569.44	34.26	0
671.34	671.34	81.33	66.47	59.83	P04114	APOB	Apolipoprotein B-100	0	auto - discordant peptide type	0	20.5	HIQNIDIQHLAGK	iTRAQ8plex@N-term; Dehydrated(D)@6; iTRAQ8plex(K)@13		-0.00807371	2076.2	520.057	2076.21	520.059	4	10	72.1.1.1055.9	0	13.3291	13510	13.3393	1.233	14.6365	0.94593	15.582	1.306	15.4397	257.66	26.94	288.02	29.5	233.18	26.94	0
671.34	671.34	81.33	66.47	59.83	P04114	APOB	Apolipoprotein B-100	1	auto	0	99	HIQNIDIQHLAGK	iTRAQ8plex@N-term; iTRAQ8plex(K)@13		-0.00119181	2094.21	524.561	2094.22	524.561	4	14	60.1.1.1179.12	1	12.4364	1071842	12.5478	0.271904	2.51412	0.289998	2.22217	0.939421	3.04497	9371.47	93.41	2310.13	53.32	2600.09	51.64	0
671.34	671.34	81.33	66.47	59.83	P04114	APOB	Apolipoprotein B-100	0	auto - discordant peptide type	0	49.87	HIQNIDIQHLAGK	No iTRAQ8plex@N-term; Delta:H(2)C(2)(H)@9; iTRAQ8plex(K)@13		0.00548448	1816.03	606.351	1816.03	606.349	3	11	78.1.1.1459.17	0	31.6623	52278	31.5826	0.507669	9.92975	0.846065	7.99547	0.601198	10.3745	339.75	17.8	156.37	13.19	275.01	16.61	0
671.34	671.34	81.33	66.47	59.83	P04114	APOB	Apolipoprotein B-100	0	auto - discordant peptide type	0	99	HIYAISSAALSASYK	Carbamyl@N-term; iTRAQ8plex(K)@15		0.00753626	1928.04	643.687	1928.03	643.684	3	14	66.1.1.1136.7	0	21.2849	15122	21.2517	1.1326	20.2013	1.12923	19.983	1.00493	20.2584	141.74	19.97	145.54	21.07	153.13	21.7	0
671.34	671.34	81.33	66.47	59.83	P04114	APOB	Apolipoprotein B-100	0	auto - discordant peptide type	0	99	HIYAISSAALSASYK	iTRAQ8plex@N-term; iTRAQ8plex(K)@15		1.01389	2190.24	548.568	2189.23	548.315	4	14	67.1.1.1271.7	0	23.0865	21367	22.9835	0.49927	28.1666	0.594871	25.2728	0.840917	31.5207	425.53	63.01	192.61	46.15	242.18	49.6	0
671.34	671.34	81.33	66.47	59.83	P04114	APOB	Apolipoprotein B-100	0	auto - discordant peptide type	0	99	HIYAISSAALSASYK	iTRAQ8plex@N-term; iTRAQ8plex(S)@7; iTRAQ8plex(K)@15		-0.00665674	2493.43	624.365	2493.44	624.366	4	14	67.1.1.1121.21	0	16.4154	72664	16.3284	1.04077	5.67234	1.36085	5.1954	0.766271	5.42412	630.35	24.31	594.77	24.74	820.69	28.57	0
671.34	671.34	81.33	66.47	59.83	P04114	APOB	Apolipoprotein B-100	0	auto - discordant peptide type	0	99	HIYAISSAALSASYK	iTRAQ8plex@N-term; iTRAQ8plex(Y)@3; iTRAQ8plex(K)@15		-0.00451656	2493.43	624.365	2493.44	624.366	4	14	69.1.1.1125.20	0	16.6525	75650	16.3439	0.785458	28.7142	1.55847	23.2107	0.50497	27.0018	295.06	52.54	210.11	47.33	439.94	65.5	0
671.34	671.34	81.33	66.47	59.83	P04114	APOB	Apolipoprotein B-100	0	auto - discordant peptide type	0	21.94	HVAEAICK	Carbamyl@N-term; Methylthio(C)@7; iTRAQ8plex(K)@8		-0.00249647	1262.64	632.327	1262.64	632.328	2	9	17.1.1.1134.8	0	15.5841	7758	15.5559	0.653471	25.1689	0.767164	23.1882	0.85345	27.1857	216.21	31.78	128.09	26.17	158.69	28.46	0
671.34	671.34	81.33	66.47	59.83	P04114	APOB	Apolipoprotein B-100	1	auto	0	99	HVAEAICK	iTRAQ8plex@N-term; Methylthio(C)@7; iTRAQ8plex(K)@8		-0.00301659	1523.84	508.953	1523.84	508.954	3	13	52.1.1.1132.12	1	11.4426	579925	11.5071	1.87547	2.23481	1.82313	2.23142	1.0307	1.94767	3057.11	53.74	5197.98	71.73	5332.28	73.29	0
671.34	671.34	81.33	66.47	59.83	P04114	APOB	Apolipoprotein B-100	1	auto	0	99	IAELSATAQEIIK	iTRAQ8plex@N-term; iTRAQ8plex(K)@13		-0.00180983	1994.19	665.736	1994.19	665.736	3	15	3.1.1.1899.8	1	34.9173	330600	34.437	0.58484	22.9222	0.782712	20.0336	0.748644	24.4502	567.64	72.8	300.97	57.18	425.07	65.42	0
671.34	671.34	81.33	66.47	59.83	P04114	APOB	Apolipoprotein B-100	0	auto - discordant peptide type	0	96.4	IAELSATAQEIIK	iTRAQ8plex@N-term; Methyl(E)@3; Deamidated(Q)@9; iTRAQ8plex(K)@13		0.0094709	2009.2	670.739	2009.19	670.736	3	12	1.1.1.1639.6	0	33.256	7635	33.2419	1.89531	23.6855	1.71731	23.9759	1.10579	20.9352	270.94	50.6	465.55	67.82	445.15	66.93	0
671.34	671.34	81.33	66.47	59.83	P04114	APOB	Apolipoprotein B-100	0	auto - discordant peptide type	0	99	IAELSATAQEIIK	iTRAQ8plex@N-term; Methyl(E)@3; iTRAQ8plex(K)@13		-0.00132258	2008.2	670.408	2008.2	670.408	3	13	1.1.1.1646.13	0	33.5875	9451	33.5597	2.19227	28.9613	2.30383	28.5082	0.953419	23.4594	172.05	40.37	341.95	58.05	379.22	61.4	0
671.34	671.34	81.33	66.47	59.83	P04114	APOB	Apolipoprotein B-100	0	auto - discordant peptide type	0	97.59	IAELSATAQEIIK	iTRAQ8plex@N-term; Methyl(I)@12; iTRAQ8plex(K)@13		0.000270903	2008.2	670.408	2008.2	670.408	3	12	3.1.1.1862.7	0	33.2064	10322	33.235	1.62008	27.4486	1.79677	26.5598	0.903406	24.1549	215.38	45.06	316.34	56.21	370.24	60.58	0
671.34	671.34	81.33	66.47	59.83	P04114	APOB	Apolipoprotein B-100	0	auto - discordant peptide type	0.00174066	73.17	IAWTSSGK	iTRAQ8plex@N-term; iTRAQ8plex(K)@8	cleaved H-I@N-term	0.00113469	1456.85	486.624	1456.85	486.624	3	10	69.1.1.1034.11	0	12.5766	94639	12.5985	1.03725	3.72246	1.07832	3.67404	0.963777	3.81193	1462.34	37.03	1375.14	37.52	1508.63	40.16	0
671.34	671.34	81.33	66.47	59.83	P04114	APOB	Apolipoprotein B-100	1	auto	0.0213631	83.18	IDGQFR	iTRAQ8plex@N-term		0.00025329	1038.58	520.296	1038.58	520.296	2	10	50.1.1.997.10	1	10.5932	99787	10.6167	0.925463	4.26344	0.597805	4.85742	1.5511	5.09817	1187.29	33.35	996.16	31.95	679.05	26.91	0
671.34	671.34	81.33	66.47	59.83	P04114	APOB	Apolipoprotein B-100	0	auto - discordant peptide type	0	60.46	IEIPLPF	iTRAQ8plex@N-term	cleaved F-G@C-term	-0.000166878	1131.68	566.85	1131.68	566.85	2	9	14.1.1.1790.3	0	40.7023	6359	40.6636	1.39533	23.6992	1.08999	24.9883	1.28261	23.9741	30.83	5.39	39	6.24	32.15	5.74	0
671.34	671.34	81.33	66.47	59.83	P04114	APOB	Apolipoprotein B-100	1	auto	0	99	IEIPLPFGGK	iTRAQ8plex@N-term; iTRAQ8plex(K)@10		0.00191324	1678.03	420.515	1678.03	420.514	4	11	56.1.1.1565.3	1	43.1161	10536	43.0123	0.594	32.9895	1.38051	24.9106	0.43111	32.0557	274.16	50.6	147.64	40.37	362.1	60.58	0
671.34	671.34	81.33	66.47	59.83	P04114	APOB	Apolipoprotein B-100	0	auto - discordant peptide type	0	99	IGQDGISTSATTNLK	iTRAQ8plex@N-term; Dehydrated(D)@4; iTRAQ8plex(K)@15		0.00142075	2095.18	699.399	2095.17	699.398	3	16	62.1.1.1088.21	0	14.4463	51398	14.3634	1.16674	6.43505	1.06611	6.51486	1.0965	6.54679	458.11	20.74	484.57	22.16	467.26	21.89	0
671.34	671.34	81.33	66.47	59.83	P04114	APOB	Apolipoprotein B-100	0	auto - discordant peptide type	0	99	IGQDGISTSATTNLK	iTRAQ8plex@N-term; Dehydrated(S)@7; iTRAQ8plex(K)@15		-0.00445279	2095.17	524.799	2095.17	524.801	4	15	62.1.1.1086.9	0	14.3381	39108	14.4074	0.794802	5.33786	0.838728	5.12663	0.949463	5.69657	838.08	28	603.89	25.14	672.5	26.15	0
671.34	671.34	81.33	66.47	59.83	P04114	APOB	Apolipoprotein B-100	1	auto	0	99	IGQDGISTSATTNLK	iTRAQ8plex@N-term; iTRAQ8plex(K)@15		0.00126827	2113.19	529.304	2113.18	529.303	4	17	39.1.1.1160.11	1	12.3703	431102	12.4765	1.35955	9.34782	1.36805	9.22469	0.995714	8.88329	1005.01	68.74	1238.74	78.93	1315.4	81.42	0
671.34	671.34	81.33	66.47	59.83	P04114	APOB	Apolipoprotein B-100	0	auto - discordant peptide type	0	99	IGQDGISTSATTNLK	iTRAQ8plex@N-term; iTRAQ8plex(S)@9; iTRAQ8plex(K)@15		-0.00237806	2417.39	605.354	2417.39	605.355	4	15	56.1.1.841.20	0	11.0063	64701	10.9676	0.999978	3.58308	1.16018	3.38071	0.863585	3.55738	1614.35	38.9	1463.53	38.81	1791.88	42.49	0
671.34	671.34	81.33	66.47	59.83	P04114	APOB	Apolipoprotein B-100	1	auto	0	99	IGVELTGR	iTRAQ8plex@N-term		3.5775e-05	1147.69	574.851	1147.69	574.851	2	14	52.1.1.1147.12	1	12.1185	758966	12.1387	1.33398	2.33495	1.06382	2.45499	1.25638	2.38435	3245.51	55.24	3925.04	62.74	3303.2	58.44	0
671.34	671.34	81.33	66.47	59.83	P04114	APOB	Apolipoprotein B-100	0	auto - discordant peptide type	0	24	IGVELTGR	iTRAQ8plex@N-term; Deamidated(R)@8		0.0196322	1148.69	575.352	1148.67	575.343	2	9	53.1.1.1154.11	0	12.3139	85702	12.2915	1.2342	3.02594	1.1979	3.01118	1.03229	2.98171	2012.31	43.47	2251.61	47.71	2306.23	48.38	0
671.34	671.34	81.33	66.47	59.83	P04114	APOB	Apolipoprotein B-100	0	auto - discordant peptide type	2	99	IHSGSFQSQVELSNDQEK	iTRAQ8plex@N-term; Dehydrated(S)@13; iTRAQ8plex(K)@18		-0.00210227	2622.35	656.594	2622.35	656.595	4	15	8.1.1.1209.16	0	12.2257	24684	12.1932	0.298366	22.9722	0.434359	18.2197	0.688243	26.043	1026.59	97.78	277.69	58.05	426.61	66.26	0
671.34	671.34	81.33	66.47	59.83	P04114	APOB	Apolipoprotein B-100	1	auto	0	99	IISDYHQQFR	iTRAQ8plex@N-term		0.00267304	1609.85	537.625	1609.85	537.625	3	14	59.1.1.1183.12	1	12.8094	443085	12.6482	0.938991	4.61178	1.04176	4.39227	0.903094	4.69405	1010.99	30.77	860.64	29.82	1007.63	31.91	0
671.34	671.34	81.33	66.47	59.83	P04114	APOB	Apolipoprotein B-100	0	auto - discordant peptide type	0	76.03	IISDYHQQFR	iTRAQ8plex@N-term; Deamidated(Q)@7		0.0237251	1610.86	537.961	1610.84	537.953	3	10	58.1.1.1181.11	0	12.7467	57342	12.4971	0.767396	20.5333	0.542595	22.617	1.41705	24.6826	577.39	73.48	401.7	64.73	299.73	56.04	0
671.34	671.34	81.33	66.47	59.83	P04114	APOB	Apolipoprotein B-100	0	auto - discordant peptide type	0	78.87	IISDYHQQFR	iTRAQ8plex@N-term; iTRAQ8plex(S)@3		-0.000336263	1914.06	479.522	1914.06	479.522	4	11	69.1.1.1011.8	0	11.5537	271233	11.9317	0.979047	3.39957	0.867414	3.46834	1.13088	3.63777	1809.95	41.18	1606.51	40.58	1502.03	39.32	0
671.34	671.34	81.33	66.47	59.83	P04114	APOB	Apolipoprotein B-100	0	auto - discordant peptide type	0	99	IISDYHQQFR	iTRAQ8plex@N-term; iTRAQ8plex(Y)@5		0.00106574	1914.06	958.036	1914.06	958.036	2	17	67.1.1.1017.12	0	11.778	26205	11.6986	0.672776	30.3915	0.923864	26.6066	0.72963	31.4537	145.54	26.08	88.77	21.79	128.64	25.3	0
671.34	671.34	81.33	66.47	59.83	P04114	APOB	Apolipoprotein B-100	0	auto - discordant peptide type	0	23.28	IISDYHQQFR	iTRAQ8plex@N-term; iTRAQ8plex(Y)@5; Deamidated(Q)@7		-0.00316931	1915.04	479.767	1915.04	479.768	4	10	48.1.1.637.8	0	12.1658	39688	12.1927	1.1328	15.5816	0.918128	16.2897	1.2362	16.4749	792.88	86.26	814.28	90.83	696.46	84.44	0
671.34	671.34	81.33	66.47	59.83	P04114	APOB	Apolipoprotein B-100	1	auto	0	38.92	IKDYFEK	iTRAQ8plex@N-term; iTRAQ8plex(K)@2; iTRAQ8plex(K)@7		-0.00479433	1854.1	464.532	1854.1	464.533	4	8	26.1.1.1213.4	1	19.5331	118486	19.4745	1.43205	2.95752	1.13982	3.10665	1.25881	2.96197	1955.57	42.9	2538.89	50.36	2132.53	46.91	0
671.34	671.34	81.33	66.47	59.83	P04114	APOB	Apolipoprotein B-100	1	auto	0	99	ILGEELGFASLHDLQLLGK	iTRAQ8plex@N-term; iTRAQ8plex(K)@19		0.00739132	2660.54	887.855	2660.54	887.853	3	18	3.1.1.2022.15	1	40.4214	16637	40.1175	0.170777	33.2585	0.456742	18.8346	0.374626	35.4719	918.13	92.41	142.15	45.06	401.2	63.87	0
671.34	671.34	81.33	66.47	59.83	P04114	APOB	Apolipoprotein B-100	0	auto - discordant peptide type	0	84.72	ILGEELGFASLHDLQLLGK	iTRAQ8plex@N-term; iTRAQ8plex(S)@10; iTRAQ8plex(K)@19		-0.00104751	2964.74	593.955	2964.74	593.956	5	12	18.1.1.2058.4	0	57.0155	8439	57.174	0.869899	28.4512	0.764107	28.9599	1.14066	31.205	83.32	15.3	65.71	14.28	60.91	13.64	0
671.34	671.34	81.33	66.47	59.83	P04114	APOB	Apolipoprotein B-100	0	auto - discordant peptide type	0	99	ILGVDSK	iTRAQ8plex@N-term; iTRAQ8plex(K)@7	cleaved M-I@N-term	-0.00290362	1338.83	447.284	1338.83	447.285	3	11	44.1.1.1084.3	0	14.0009	133364	14.3395	0.774195	3.33763	0.691589	3.38631	1.12161	3.7436	2176.85	45.12	1527.89	39.97	1440.33	38.57	0
671.34	671.34	81.33	66.47	59.83	P04114	APOB	Apolipoprotein B-100	0	auto - shared MS/MS	0.00305075	40.16	ILNIK	iTRAQ8plex@N-term; iTRAQ8plex(K)@5	cleaved Y-I@N-term	-0.00588673	1207.81	403.609	1207.81	403.611	3	8	76.1.1.1055.3	0	13.1521	244433	13.1427	27.8467	4.22266	29.3023	4.21802	0.952164	1.03929	674.95	28.05	17039.5	127.47	18921.6	136.51	0
671.34	671.34	81.33	66.47	59.83	P04114	APOB	Apolipoprotein B-100	0	auto - discordant peptide type	0	52.19	ILQWLK	iTRAQ8plex@N-term; iTRAQ8plex(K)@6	cleaved H-I@N-term	-0.00615166	1407.9	470.307	1407.91	470.309	3	10	84.1.1.1816.5	0	51.7874	145987	51.9083	2.05905	4.10878	1.55086	4.33425	1.33025	3.73712	871.87	28.72	1627.54	39.97	1293.63	36.44	0
671.34	671.34	81.33	66.47	59.83	P04114	APOB	Apolipoprotein B-100	1	auto	0	22.91	INAFR	iTRAQ8plex@N-term		-0.00094721	923.549	462.782	923.55	462.782	2	7	83.1.1.983.13	1	12.8606	24457	12.7864	0.899849	20.1405	0.933597	19.496	0.965719	21.0062	543.59	71.34	443.46	67.75	485.53	70	0
671.34	671.34	81.33	66.47	59.83	P04114	APOB	Apolipoprotein B-100	1	auto	0.0145735	77.35	INFNEK	iTRAQ8plex@N-term; iTRAQ8plex(K)@6		-0.00150999	1371.8	458.272	1371.8	458.273	3	10	38.1.1.1141.6	1	11.6482	904684	11.6336	0.933119	1.36536	0.775592	1.42335	1.20544	1.50566	11542.2	103.98	9764.23	100.18	8564.58	94.38	0
671.34	671.34	81.33	66.47	59.83	P04114	APOB	Apolipoprotein B-100	0	auto - discordant peptide type	0	78.78	INNQLTLDSNTK	iTRAQ8plex@N-term; Deamidated(N)@2; Dehydrated(S)@9; iTRAQ8plex(K)@12		-0.000167603	1951.08	651.368	1951.08	651.368	3	12	41.1.1.1178.20	0	13.2367	17176	13.1997	0.957696	29.0829	0.923812	28.831	1.03869	30.4954	250.84	48.48	217.79	47.33	221.7	47.43	0
671.34	671.34	81.33	66.47	59.83	P04114	APOB	Apolipoprotein B-100	0	auto - discordant peptide type	0	61.46	INNQLTLDSNTK	iTRAQ8plex@N-term; Deamidated(N)@3; Dehydrated(S)@9; iTRAQ8plex(K)@12		-0.00167373	1951.08	651.368	1951.08	651.368	3	12	40.1.1.1172.18	0	13.0538	19335	13.064	1.71651	25.7939	1.39874	26.8168	1.22956	24.2882	237.46	47.33	369.53	60.5	317.77	57.01	0
671.34	671.34	81.33	66.47	59.83	P04114	APOB	Apolipoprotein B-100	0	auto - discordant peptide type	0	99	INNQLTLDSNTK	iTRAQ8plex@N-term; Dehydrated(S)@9; iTRAQ8plex(K)@12		0.000623718	1950.1	651.041	1950.1	651.04	3	12	61.1.1.832.18	0	13.1865	43943	13.1522	0.629278	18.502	0.568968	18.5665	1.10814	21.43	820.07	87.52	467.85	70.71	446.4	67.82	0
671.34	671.34	81.33	66.47	59.83	P04114	APOB	Apolipoprotein B-100	1	auto	0	99	INNQLTLDSNTK	iTRAQ8plex@N-term; iTRAQ8plex(K)@12		-0.00173165	1968.11	657.043	1968.11	657.044	3	18	34.1.1.1070.19	1	13.2943	451971	13.394	0.823046	3.52718	0.93596	3.31837	0.881064	3.67211	1877.71	41.92	1401.09	38.26	1681.4	41.28	0
671.34	671.34	81.33	66.47	59.83	P04114	APOB	Apolipoprotein B-100	0	auto - discordant peptide type	0	15.27	INNQLTLDSNTK	iTRAQ8plex@N-term; iTRAQ8plex(S)@9; iTRAQ8plex(K)@12		0.000755971	2272.32	569.086	2272.32	569.086	4	9	55.1.1.1007.12	0	10.9867	23381	10.9612	1.07009	4.46437	1.04481	4.43067	1.02619	4.55781	998.06	30.59	968.26	31.43	997.65	31.92	0
671.34	671.34	81.33	66.47	59.83	P04114	APOB	Apolipoprotein B-100	1	auto	0.405607	99	INPLALK	iTRAQ8plex@N-term; iTRAQ8plex(K)@7		-0.00252289	1375.9	459.64	1375.9	459.641	3	10	79.1.1.1278.7	1	23.0875	8989	23.0723	1.20033	27.3105	0.988525	28.473	1.21662	28.394	250.29	48.48	272.37	52.44	236.71	49.4	0
671.34	671.34	81.33	66.47	59.83	P04114	APOB	Apolipoprotein B-100	0	auto - discordant peptide type	0	74.15	IPSVQINFK	iTRAQ8plex@N-term; Deamidated(Q)@5; iTRAQ8plex(K)@9		0.00076796	1653.99	552.338	1653.99	552.338	3	10	49.1.1.1037.11	0	31.2528	38411	31.2294	1.56996	4.32298	1.23619	4.55129	1.27246	4.23505	877.85	28.76	1249.46	35.24	1038.22	32.8	0
671.34	671.34	81.33	66.47	59.83	P04114	APOB	Apolipoprotein B-100	1	auto	0	99	IPSVQINFK	iTRAQ8plex@N-term; iTRAQ8plex(K)@9		-0.00231517	1653.01	552.009	1653.01	552.01	3	12	71.1.1.1432.7	1	29.9427	205492	29.8407	0.724889	3.42053	1.10837	2.92835	0.655283	3.42264	2184.24	45.19	1435.44	39.1	2316.16	48	0
671.34	671.34	81.33	66.47	59.83	P04114	APOB	Apolipoprotein B-100	0	auto - shared MS/MS	0.00130484	23.21	IQDLK	iTRAQ8plex@N-term; iTRAQ8plex(K)@5	cleaved D-I@N-term	-0.00182939	1223.77	408.93	1223.77	408.931	3	7	37.1.1.1141.3	0	11.1446	35288	11.2247	0.861678	6.31037	1.94022	5.04877	0.444974	5.73187	576.9	23.24	450.67	21.89	1070.87	32.59	0
671.34	671.34	81.33	66.47	59.83	P04114	APOB	Apolipoprotein B-100	1	auto	2	99	IQIQEK	iTRAQ8plex@N-term; iTRAQ8plex(K)@6		-0.00395403	1365.84	683.927	1365.84	683.929	2	10	36.1.1.1007.18	1	10.5373	279603	10.5919	0.958456	3.89616	0.817416	4.01855	1.17481	4.23078	1395.07	36.15	1212.22	35.27	1091	33.51	0
671.34	671.34	81.33	66.47	59.83	P04114	APOB	Apolipoprotein B-100	0	auto - discordant peptide type	0	20.86	ISHTIEVPTFGK	iTRAQ8plex@N-term; iTRAQ8plex(H)@3; iTRAQ8plex(K)@12	cleaved H-I@N-term	-0.0265751	2240.3	561.083	2240.33	561.09	4	10	62.1.1.1119.17	0	15.8266	17272	15.8385	1.29795	19.1592	1.31773	18.8498	0.986897	18.3972	489.49	67.82	575.99	76.22	617.1	78.87	0
671.34	671.34	81.33	66.47	59.83	P04114	APOB	Apolipoprotein B-100	0	auto - discordant peptide type	0	99	ISHTIEVPTFGK	iTRAQ8plex@N-term; iTRAQ8plex(K)@12	cleaved H-I@N-term	0.000194328	1936.12	646.382	1936.12	646.382	3	16	56.1.1.1030.10	0	19.3514	55836	19.4541	0.788118	17.0933	1.12736	14.9887	0.700439	17.0345	412.65	43.93	294.84	39.43	445.07	46.96	0
671.34	671.34	81.33	66.47	59.83	P04114	APOB	Apolipoprotein B-100	0	auto - discordant peptide type	0	87.06	ISHTIEVPTFGK	iTRAQ8plex@N-term; iTRAQ8plex(S)@2; iTRAQ8plex(K)@12	cleaved H-I@N-term	-0.00542885	2240.32	561.088	2240.33	561.09	4	12	63.1.1.1123.10	0	15.8604	23768	15.7941	1.33365	21.0331	1.44416	20.4319	0.925268	19.775	401.04	61.4	484.89	69.93	554.1	74.97	0
671.34	671.34	81.33	66.47	59.83	P04114	APOB	Apolipoprotein B-100	0	auto - discordant peptide type	0	52.08	ITELLK	iTRAQ8plex@N-term; iTRAQ8plex(K)@6	cleaved Y-I@N-term	-0.00317066	1323.86	662.935	1323.86	662.937	2	9	50.1.1.1264.17	0	22.3895	16948	22.4459	20.78	50.5563	11.8277	51.4532	1.7603	17.7011	45.22	22.36	851.9	89.72	511.7	72.8	0
671.34	671.34	81.33	66.47	59.83	P04114	APOB	Apolipoprotein B-100	0	auto - discordant peptide type	0	99	ITEVALMGH	iTRAQ8plex@N-term	cleaved H-L@C-term	-0.00465413	1273.7	637.855	1273.7	637.858	2	15	54.1.1.1282.12	0	17.9415	41084	17.9617	1.28998	10.1994	1.4054	9.86064	0.919654	9.63662	173.46	12.77	202.86	14.32	233.23	15.3	0
671.34	671.34	81.33	66.47	59.83	P04114	APOB	Apolipoprotein B-100	0	auto - discordant peptide type	0	93.15	ITEVALMGHLSCDTK	iTRAQ8plex@N-term; iTRAQ8plex(H)@9; Methylthio(C)@12; iTRAQ8plex(K)@15		-0.00298291	2575.39	516.086	2575.39	516.086	5	13	46.1.1.1582.9	0	35.9395	17784	36.0105	1.65802	25.434	2.54056	23.2357	0.653881	20.7402	249.25	48.48	374.66	61.4	605.83	77.01	0
671.34	671.34	81.33	66.47	59.83	P04114	APOB	Apolipoprotein B-100	0	auto - discordant peptide type	0	16.49	ITEVALMGHLSCDTK	iTRAQ8plex@N-term; iTRAQ8plex(S)@11; Methylthio(C)@12; iTRAQ8plex(K)@15		-0.00216794	2575.39	516.086	2575.39	516.086	5	10	48.1.1.1183.9	0	36.2045	15400	36.0468	1.32211	27.9666	1.34976	27.4838	0.981415	26.6791	227.67	46.26	272.89	52.44	294	54.41	0
671.34	671.34	81.33	66.47	59.83	P04114	APOB	Apolipoprotein B-100	1	auto	0	99	ITEVALMGHLSCDTK	iTRAQ8plex@N-term; Methylthio(C)@12; iTRAQ8plex(K)@15		-0.000489828	2271.19	568.804	2271.19	568.804	4	14	13.1.1.1453.8	1	25.5883	94493	25.751	1.47194	25.5722	1.80625	24.2262	0.816492	22.6837	259.23	49.4	345.93	58.99	447.97	67.01	0
671.34	671.34	81.33	66.47	59.83	P04114	APOB	Apolipoprotein B-100	1	auto	0	98.34	ITLPDFR	iTRAQ8plex@N-term		0.000746194	1164.68	583.348	1164.68	583.348	2	12	52.1.1.1308.16	1	19.2084	1015913	19.177	1.04637	1.51469	0.80941	1.61477	1.29526	1.66189	8763.71	90.65	8313.54	91.99	6786.44	84.15	0
671.34	671.34	81.33	66.47	59.83	P04114	APOB	Apolipoprotein B-100	1	auto	0	99	IVQILPWEQNEQVK	iTRAQ8plex@N-term; iTRAQ8plex(K)@14		-9.9812e-05	2331.34	778.121	2331.34	778.121	3	19	2.1.1.1511.19	1	27.6331	831392	27.3739	0.497204	4.52067	0.559434	4.14605	0.890484	5.13393	1656.06	39.31	746.49	28.72	886.36	30.13	0
671.34	671.34	81.33	66.47	59.83	P04114	APOB	Apolipoprotein B-100	1	auto	0.0204516	82.73	IVSLIK	iTRAQ8plex@N-term; iTRAQ8plex(K)@6		-0.00264696	1279.87	640.94	1279.87	640.942	2	10	83.1.1.1232.19	1	23.8912	117359	23.9899	0.6842	4.75404	0.850721	4.30462	0.805816	5.02086	1173.85	33.12	728.13	27.86	955.4	31.06	0
671.34	671.34	81.33	66.47	59.83	P04114	APOB	Apolipoprotein B-100	0	auto - discordant peptide type	0	99	IYSLWEH	iTRAQ8plex@N-term	cleaved H-S@C-term	-0.00102232	1250.66	626.337	1250.66	626.337	2	12	28.1.1.1745.10	0	43.0095	21195	42.9415	1.15973	7.62424	0.639254	9.07321	1.81771	9.10451	326.02	17.49	342.78	18.57	199.39	14.59	0
671.34	671.34	81.33	66.47	59.83	P04114	APOB	Apolipoprotein B-100	1	auto	0	99	IYSLWEHSTK	iTRAQ8plex@N-term; iTRAQ8plex(K)@10		0.000788324	1871.04	624.688	1871.04	624.687	3	14	60.1.1.1338.16	1	19.5146	298138	19.8398	0.952125	21.579	1.07183	20.5378	0.89004	21.8699	457.94	65.5	395.29	63.87	469.59	69.21	0
671.34	671.34	81.33	66.47	59.83	P04114	APOB	Apolipoprotein B-100	0	auto - discordant peptide type	0	24.26	IYSLWEHSTK	iTRAQ8plex@N-term; iTRAQ8plex(S)@8; iTRAQ8plex(K)@10		-0.0091639	2175.24	544.816	2175.25	544.819	4	10	67.1.1.1246.15	0	21.9771	22135	22.0386	1.18863	6.14874	1.77328	5.51461	0.671601	5.53347	499.56	21.66	538.33	23.47	847.52	28.88	0
671.34	671.34	81.33	66.47	59.83	P04114	APOB	Apolipoprotein B-100	0	auto - discordant peptide type	0	99	IYSLWEHSTK	iTRAQ8plex@N-term; iTRAQ8plex(Y)@2; iTRAQ8plex(K)@10		-0.00570353	2175.24	544.817	2175.25	544.819	4	12	65.1.1.1008.14	0	16.4385	43860	16.5013	0.964719	5.31288	1.03394	5.1075	0.934861	5.41249	749.26	26.5	655.31	25.98	741.16	27.31	0
671.34	671.34	81.33	66.47	59.83	P04114	APOB	Apolipoprotein B-100	1	auto	0	99	KGNVATEISTER	iTRAQ8plex@N-term; iTRAQ8plex(K)@1	missed K-G@1	-0.00270187	1912.08	638.368	1912.08	638.369	3	14	24.1.1.1009.21	1	10.3285	368610	10.1058	0.547687	31.0574	1.32838	22.7151	0.413096	30.2456	329.99	55.5	163.85	42.78	419.38	64.03	0
671.34	671.34	81.33	66.47	59.83	P04114	APOB	Apolipoprotein B-100	0	auto - discordant peptide type	0	80.43	KGNVATEISTER	iTRAQ8plex@N-term; iTRAQ8plex(K)@1; Dehydrated(E)@7	missed K-G@1	2.86722e-05	1894.07	474.526	1894.07	474.526	4	12	51.1.1.933.10	0	7.5702	20200	7.548	1.11047	23.996	0.882028	25.3332	1.26144	25.7356	337.89	56.3	340.17	58.74	285.13	54.41	0
671.34	671.34	81.33	66.47	59.83	P04114	APOB	Apolipoprotein B-100	0	auto - discordant peptide type	0	70.3	KGNVATEISTER	iTRAQ8plex@N-term; iTRAQ8plex(K)@1; Dehydrated(S)@9	missed K-G@1	-0.00634533	1894.07	474.524	1894.07	474.526	4	12	49.1.1.502.10	0	7.5162	21494	7.4942	0.883032	24.5315	0.659463	26.5671	1.34161	28.3016	369.57	58.82	295.86	55.23	233.17	49.6	0
671.34	671.34	81.33	66.47	59.83	P04114	APOB	Apolipoprotein B-100	0	auto - discordant peptide type	0	33.56	KGNVATEISTER	iTRAQ8plex@N-term; iTRAQ8plex(K)@1; iTRAQ8plex(S)@9	missed K-G@1	-0.007798	2216.28	444.264	2216.29	444.265	5	10	43.1.1.978.7	0	9.2823	17333	9.3109	1.54186	18.2044	1.21442	19.1866	1.27209	17.9446	499.02	68.56	697.55	83.31	579.79	77.65	0
671.34	671.34	81.33	66.47	59.83	P04114	APOB	Apolipoprotein B-100	0	auto - discordant peptide type	0	99	KGNVATEISTER	iTRAQ8plex@N-term; No iTRAQ8plex(K)@1	missed K-G@1	-0.000708046	1607.88	536.967	1607.88	536.967	3	15	23.1.1.948.17	0	7.6327	61661	7.6897	0.895195	8.10775	1.15583	7.40493	0.776002	8.06588	337.49	17.78	273.9	16.88	373.2	19.42	0
671.34	671.34	81.33	66.47	59.83	P04114	APOB	Apolipoprotein B-100	0	auto - discordant peptide type	2	99	KIISDYHQQFR	iTRAQ8plex@N-term; iTRAQ8plex(K)@1	missed K-I@1	-1.00209	2041.15	511.295	2042.15	511.545	4	13	61.1.1.781.10	0	10.8934	59524	10.6469	1.02142	4.03191	0.893786	4.13149	1.14501	4.28854	1255.59	34.31	1162.69	34.47	1073.66	33.27	0
671.34	671.34	81.33	66.47	59.83	P04114	APOB	Apolipoprotein B-100	0	auto - discordant peptide type	0	99	KIISDYHQQFR	iTRAQ8plex@N-term; iTRAQ8plex(K)@1; iTRAQ8plex(Y)@6	missed K-I@1	-0.00771636	2346.35	587.595	2346.36	587.597	4	12	69.1.1.986.18	0	10.4539	50589	10.4642	1.0156	3.47149	1.10097	3.33599	0.924249	3.48849	1702.66	39.95	1567.71	40.11	1793.45	42.53	0
671.34	671.34	81.33	66.47	59.83	P04114	APOB	Apolipoprotein B-100	1	auto	0	99	KITEVALMGHLSCDTK	iTRAQ8plex@N-term; iTRAQ8plex(K)@1; Methylthio(C)@13; iTRAQ8plex(K)@16	missed K-I@1	-0.00168092	2703.49	541.705	2703.49	541.705	5	13	35.1.1.1509.4	1	33.1293	21126	33.0247	1.29315	24.8003	1.28597	24.5658	1.00753	24.0063	292.64	52.44	343.08	58.82	360.04	60.5	0
671.34	671.34	81.33	66.47	59.83	P04114	APOB	Apolipoprotein B-100	1	auto	0.244125	98.68	KLNELSFK	iTRAQ8plex@N-term; iTRAQ8plex(K)@1; iTRAQ8plex(K)@8	missed K-L@1	-0.000579522	1890.17	631.064	1890.17	631.064	3	12	59.1.1.1191.19	1	13.1878	89668	13.1506	1.01808	3.61692	1.09407	3.48856	0.932349	3.6447	1566.07	38.31	1445.46	38.51	1639.23	40.77	0
671.34	671.34	81.33	66.47	59.83	P04114	APOB	Apolipoprotein B-100	0	auto - discordant peptide type	0.00130484	68.95	KLQSTTVMNPY	iTRAQ8plex@N-term; iTRAQ8plex(K)@1	cleaved Y-M@C-term; missed K-L@1	-0.00214551	1889.05	630.691	1889.05	630.692	3	10	62.1.1.1079.19	0	14.0466	53618	14.011	0.788781	6.38783	0.800482	6.20765	0.98729	6.89393	587.97	23.45	420.46	20.98	450.29	21.42	0
671.34	671.34	81.33	66.47	59.83	P04114	APOB	Apolipoprotein B-100	1	auto	0	99	KLTISEQNIQR	iTRAQ8plex@N-term; iTRAQ8plex(K)@1	missed K-L@1	0.000256352	1937.15	485.295	1937.15	485.295	4	14	55.1.1.1005.11	1	10.8933	1248767	10.6883	0.879107	3.98963	1.21785	3.56184	0.723247	3.91551	1411.04	36.35	1124.59	34.26	1644.07	40.44	0
671.34	671.34	81.33	66.47	59.83	P04114	APOB	Apolipoprotein B-100	0	auto - discordant peptide type	0	99	KLTISEQNIQR	iTRAQ8plex@N-term; iTRAQ8plex(K)@1; Deamidated(N)@8	missed K-L@1	-0.024895	1938.11	485.535	1938.14	485.541	4	11	27.1.1.1047.6	0	12.0438	46559	12.0741	1.24954	4.23629	1.55935	3.96544	0.802874	3.91244	1023.05	31	1158.94	34.31	1526.25	39.04	0
671.34	671.34	81.33	66.47	59.83	P04114	APOB	Apolipoprotein B-100	0	auto - discordant peptide type	2	99	KLTISEQNIQR	iTRAQ8plex@N-term; iTRAQ8plex(K)@1; Deamidated(Q)@10	missed K-L@1	-0.0140923	1938.12	485.538	1938.14	485.541	4	14	25.1.1.1042.4	0	11.8127	82442	11.7491	1.23352	3.42765	1.26342	3.36338	0.978221	3.33072	1569.4	38.39	1755.06	42.14	1897	43.79	0
671.34	671.34	81.33	66.47	59.83	P04114	APOB	Apolipoprotein B-100	0	auto - discordant peptide type	0	99	KLTISEQNIQR	iTRAQ8plex@N-term; iTRAQ8plex(K)@1; Deamidated(Q)@7	missed K-L@1	-0.0146299	1938.12	647.048	1938.14	647.053	3	13	29.1.1.1032.20	0	11.4846	15359	11.4457	0.861559	19.12	0.620202	20.9524	1.39185	22.3933	308.75	38.01	241.16	35.28	183.2	31.06	0
671.34	671.34	81.33	66.47	59.83	P04114	APOB	Apolipoprotein B-100	0	auto - discordant peptide type	0	93.72	KLTISEQNIQR	iTRAQ8plex@N-term; iTRAQ8plex(K)@1; Dehydrated(E)@6	missed K-L@1	-0.00339209	1919.14	480.792	1919.14	480.793	4	12	67.1.1.990.10	0	10.5662	36465	10.544	0.979524	3.74737	0.74374	4.01562	1.31957	4.1914	1487.65	37.34	1321.08	36.76	1058.54	33.18	0
671.34	671.34	81.33	66.47	59.83	P04114	APOB	Apolipoprotein B-100	0	auto - discordant peptide type	0	76.69	KLTISEQNIQR	iTRAQ8plex@N-term; iTRAQ8plex(K)@1; iTRAQ8plex(S)@5	missed K-L@1	-0.0289298	2241.33	449.273	2241.36	449.279	5	11	63.1.1.992.4	0	9.9746	15119	9.9636	1.09746	4.5796	1.04068	4.58184	1.05661	4.68025	934.92	29.61	930.2	30.77	930.84	30.82	0
671.34	671.34	81.33	66.47	59.83	P04114	APOB	Apolipoprotein B-100	1	auto	0.450997	99	KMTSNFPVDLSDYPK	iTRAQ8plex@N-term; iTRAQ8plex(K)@1; iTRAQ8plex(K)@15	missed K-M@1	0.00184056	2653.46	664.372	2653.46	664.371	4	12	23.1.1.1409.4	1	28.1132	7149	28.0834	0.966179	27.0799	1.04306	25.9951	0.928086	27.5498	57.63	10.39	50.48	10.2	57.51	10.77	0
671.34	671.34	81.33	66.47	59.83	P04114	APOB	Apolipoprotein B-100	1	auto	0.00261362	36.9	KQHLFVK	iTRAQ8plex@N-term; iTRAQ8plex(K)@1; iTRAQ8plex(K)@7	missed K-Q@1	-0.00419546	1811.15	453.795	1811.15	453.796	4	8	70.1.1.967.8	1	9.4254	62431	9.4523	0.876443	3.22717	0.682649	3.43376	1.28637	3.67168	2145.98	44.82	1705.15	41.95	1401.55	38.2	0
671.34	671.34	81.33	66.47	59.83	P04114	APOB	Apolipoprotein B-100	1	auto	2	99	KSISAALEHK	iTRAQ8plex@N-term; iTRAQ8plex(K)@1; iTRAQ8plex(K)@10	missed K-S@1	-0.00549058	1995.22	499.812	1995.22	499.813	4	14	61.1.1.771.10	1	10.436	122087	10.4595	0.816527	2.51916	0.825197	2.45824	0.99141	2.70622	3694.72	58.8	2735.05	53.41	2916.92	54.65	0
671.34	671.34	81.33	66.47	59.83	P04114	APOB	Apolipoprotein B-100	0	auto - discordant peptide type	0	99	KYTYNYEAESSSGVPGTADSR	iTRAQ8plex@N-term; iTRAQ8plex(K)@1; Dehydrated(S)@20	missed K-Y@1	0.00300333	2871.42	718.861	2871.41	718.861	4	15	25.1.1.1041.8	0	11.7875	37602	11.7927	0.765231	13.9341	0.837139	13.2544	0.915873	14.8856	378.52	32.59	262.6	28.77	303.16	30.55	0
671.34	671.34	81.33	66.47	59.83	P04114	APOB	Apolipoprotein B-100	0	auto - discordant peptide type	2	99	KYTYNYEAESSSGVPGTADSR	iTRAQ8plex@N-term; iTRAQ8plex(K)@1; iTRAQ8plex(S)@11	missed K-Y@1	0.00378219	3193.63	639.734	3193.63	639.733	5	13	20.1.1.1028.20	0	10.9243	25145	10.9312	1.40742	6.7548	0.911487	7.54791	1.54708	7.26304	377.38	18.84	481.52	21.91	329.09	18.63	0
671.34	671.34	81.33	66.47	59.83	P04114	APOB	Apolipoprotein B-100	0	auto - discordant peptide type	0	73.99	KYTYNYEAESSSGVPGTADSR	iTRAQ8plex@N-term; iTRAQ8plex(K)@1; iTRAQ8plex(Y)@6	missed K-Y@1	0.00411808	3193.63	639.734	3193.63	639.733	5	11	21.1.1.1027.20	0	10.9234	24140	10.884	0.784645	20.5979	0.579709	22.2887	1.35614	24.2959	565.54	72.73	402.3	64.73	313.66	57.1	0
671.34	671.34	81.33	66.47	59.83	P04114	APOB	Apolipoprotein B-100	0	auto - discordant peptide type	0	46.25	LAAYL	iTRAQ8plex@N-term	cleaved L-M@C-term	-0.00101743	853.521	427.768	853.522	427.768	2	6	71.1.1.1766.2	0	44.9469	33601	45.1168	1.03352	11.1983	0.533942	13.8293	1.93939	14.1495	161.07	12.29	150.92	12.37	82.28	9.49	0
671.34	671.34	81.33	66.47	59.83	P04114	APOB	Apolipoprotein B-100	0	auto - discordant peptide type	0	35.28	LAAYLML	iTRAQ8plex@N-term	cleaved L-M@C-term	-0.000826916	1097.65	549.83	1097.65	549.83	2	9	79.1.1.2326.4	0	69.9023	384687	69.8039	1.31834	12.2211	1.09287	12.7498	1.20865	12.4195	119.16	10.58	142.42	11.96	124.59	11.4	0
671.34	671.34	81.33	66.47	59.83	P04114	APOB	Apolipoprotein B-100	0	auto - discordant peptide type	0	98.89	LAAYLMLMR	iTRAQ8plex@N-term; Oxidation(M)@6; Oxidation(M)@8		0.000240167	1416.78	473.267	1416.78	473.266	3	14	86.1.1.1711.5	0	40.9174	77120	40.8121	0.823274	8.43168	0.589899	9.23283	1.39832	9.95639	327.02	17.49	244.08	15.91	184.56	13.89	0
671.34	671.34	81.33	66.47	59.83	P04114	APOB	Apolipoprotein B-100	0	auto - discordant peptide type	0	99	LAAYLMLMR	iTRAQ8plex@N-term; Oxidation(M)@8		-0.000118598	1400.78	467.935	1400.78	467.935	3	11	83.1.1.1783.4	0	48.3508	32853	48.2519	1.283	11.8634	1.6541	11.0489	0.77715	10.8108	128.77	11	149.78	12.33	203.78	14.28	0
671.34	671.34	81.33	66.47	59.83	P04114	APOB	Apolipoprotein B-100	0	auto - discordant peptide type	0	99	LAAYLMLMR	iTRAQ8plex@N-term; Trimethyl(R)@9		-0.00232592	1426.83	714.423	1426.83	714.425	2	14	89.1.1.2413.13	0	69.7996	41199	69.7734	0.726633	25.8208	0.79888	24.3674	0.911326	27.7377	380.79	59.67	250.85	51.48	291.04	54.31	0
671.34	671.34	81.33	66.47	59.83	P04114	APOB	Apolipoprotein B-100	1	auto	0.58838	99	LAIPEGK	iTRAQ8plex@N-term; iTRAQ8plex(K)@7		-0.00397427	1334.83	668.424	1334.84	668.426	2	12	45.1.1.1063.18	1	13.0459	148674	13.0561	0.7975	5.16379	0.693518	5.28759	1.15216	5.7996	891.51	28.88	644.57	25.92	591.52	24.72	0
671.34	671.34	81.33	66.47	59.83	P04114	APOB	Apolipoprotein B-100	0	auto - discordant peptide type	0	90.86	LALWGEHTGQLYSK	iTRAQ8plex@N-term; iTRAQ8plex(H)@7; iTRAQ8plex(K)@14		0.000643753	2514.44	629.616	2514.44	629.616	4	12	66.1.1.1043.16	0	17.151	28370	17.1181	1.12828	21.3862	0.981437	21.9445	1.15184	22.2314	422.03	62.93	431.69	66.18	396.27	63.8	0
671.34	671.34	81.33	66.47	59.83	P04114	APOB	Apolipoprotein B-100	1	auto	0	99	LALWGEHTGQLYSK	iTRAQ8plex@N-term; iTRAQ8plex(K)@14		0.00833219	2210.24	737.754	2210.23	737.751	3	13	57.1.1.1217.11	1	30.2073	13108	30.1689	1.00895	31.1349	1.5051	27.5913	0.671648	29.1924	106.69	22.36	97.59	22.47	153.63	27.57	0
671.34	671.34	81.33	66.47	59.83	P04114	APOB	Apolipoprotein B-100	0	auto - discordant peptide type	0	99	LALWGEHTGQLYSK	iTRAQ8plex@N-term; iTRAQ8plex(Y)@12; iTRAQ8plex(K)@14		-0.00273799	2514.43	503.894	2514.44	503.895	5	15	66.1.1.1041.6	0	17.0413	33504	17.0715	1.38464	15.1691	1.47212	14.783	0.9424	14.1481	757.04	84.38	950.32	97.78	1066.22	103.54	0
671.34	671.34	81.33	66.47	59.83	P04114	APOB	Apolipoprotein B-100	0	auto - discordant peptide type	0	97.9	LALWGEHTGQLYSK	iTRAQ8plex@N-term; Oxidation(W)@4; iTRAQ8plex(K)@14		0.000578542	2226.23	557.564	2226.23	557.564	4	13	57.1.1.1082.11	0	24.2112	14509	24.233	1.41452	23.7036	0.57396	31.051	2.46926	30.155	305.07	53.57	391.22	62.29	167.52	42.9	0
671.34	671.34	81.33	66.47	59.83	P04114	APOB	Apolipoprotein B-100	1	auto	0	99	LAPGELTIIL	iTRAQ8plex@N-term		-0.00138173	1342.84	672.426	1342.84	672.426	2	12	26.1.1.2242.3	1	65.4215	143851	64.949	0.469662	30.8679	0.813797	24.2711	0.578241	32.3152	37.53	5.92	15.98	4.24	29.22	5.39	0
671.34	671.34	81.33	66.47	59.83	P04114	APOB	Apolipoprotein B-100	0	auto - discordant peptide type	0	92.06	LAPGELTIIL	iTRAQ8plex@N-term; Dehydrated(E)@5		-0.00121617	1324.83	663.42	1324.83	663.421	2	12	83.1.1.2162.9	0	65.2024	62900	65.3579	1.40626	12.0395	1.23074	12.2743	1.14482	11.7335	119.06	10.58	151.79	12.33	140.19	11.87	0
671.34	671.34	81.33	66.47	59.83	P04114	APOB	Apolipoprotein B-100	0	auto - discordant peptide type	0	99	LATALSLSNK	iTRAQ8plex@N-term; Deamidated(N)@9; iTRAQ8plex(K)@10		0.0173697	1626	543.007	1625.98	543.001	3	15	69.1.1.1376.14	0	27.8045	80569	27.6849	0.923771	2.69627	0.892034	2.67483	1.03758	2.85362	2982.15	52.85	2497.51	50.75	2545.05	50.99	0
671.34	671.34	81.33	66.47	59.83	P04114	APOB	Apolipoprotein B-100	1	auto	0	99	LATALSLSNK	iTRAQ8plex@N-term; iTRAQ8plex(K)@10		-0.00213914	1625	542.672	1625	542.673	3	11	67.1.1.1400.10	1	28.8176	16118	28.7492	0.450053	30.0311	0.995718	21.776	0.452864	30.4216	413.93	62.13	168.89	43.93	394.32	62.21	0
671.34	671.34	81.33	66.47	59.83	P04114	APOB	Apolipoprotein B-100	0	auto - shared MS/MS	0	20.46	LDFR	iTRAQ8plex@N-term		3.47799e-05	853.496	427.755	853.496	427.755	2	6	54.1.1.1150.3	0	12.1268	793875	12.0263	0.904293	4.63209	0.900963	4.55752	1.00564	4.89262	1024.13	30.97	839.61	29.46	882.77	30.1	0
671.34	671.34	81.33	66.47	59.83	P04114	APOB	Apolipoprotein B-100	0	auto - discordant peptide type	0	79.03	LDFSSQADLR	iTRAQ8plex@N-term; Dehydrated(D)@8		-0.00122643	1436.76	719.385	1436.76	719.386	2	11	59.1.1.1301.20	0	18.1013	11892	18.064	1.46939	31.3529	2.4144	28.1337	0.609772	26.2241	173.18	40.37	230.7	48.37	400.03	63.01	0
671.34	671.34	81.33	66.47	59.83	P04114	APOB	Apolipoprotein B-100	0	auto - discordant peptide type	0	91.9	LDFSSQADLR	iTRAQ8plex@N-term; iTRAQ8plex(S)@4		-0.00383505	1758.97	440.75	1758.97	440.75	4	12	39.1.1.1171.4	0	12.8415	39948	12.7854	1.13533	5.84298	1.03778	5.90192	1.09612	5.97343	563.74	23	580.25	24.27	559.72	23.87	0
671.34	671.34	81.33	66.47	59.83	P04114	APOB	Apolipoprotein B-100	0	auto - discordant peptide type	0	95.17	LDFSSQADLR	iTRAQ8plex@N-term; Trimethyl(A)@7		0.00232882	1496.82	499.946	1496.81	499.945	3	13	72.1.1.1564.10	0	35.8568	23534	35.9708	1.79714	8.48561	1.12432	9.46117	1.60152	8.5845	215.04	14.25	350.36	18.57	231.31	15.62	0
671.34	671.34	81.33	66.47	59.83	P04114	APOB	Apolipoprotein B-100	0	auto - discordant peptide type	0	98.12	LDFSSQADLR	iTRAQ8plex@N-term; Trimethyl(R)@10		0.000984067	1496.81	499.946	1496.81	499.945	3	13	70.1.1.1568.10	0	36.028	22258	35.9161	1.07266	8.40562	1.95025	7.18308	0.551074	7.49105	283.63	16.31	275.82	16.91	529.21	22.78	0
671.34	671.34	81.33	66.47	59.83	P04114	APOB	Apolipoprotein B-100	0	auto - discordant peptide type	0	36.63	LDNIYSSDK	iTRAQ8plex@N-term; Dehydrated(D)@2; iTRAQ8plex(K)@9		0.00249879	1643.9	548.974	1643.9	548.973	3	10	33.1.1.1206.8	0	14.1135	40944	14.0091	0.75602	29.0232	1.23162	24.5554	0.615028	28.487	295.14	52.54	202.29	46.37	347.77	58.82	0
671.34	671.34	81.33	66.47	59.83	P04114	APOB	Apolipoprotein B-100	0	auto - discordant peptide type	0	20.17	LDNIYSSDK	iTRAQ8plex@N-term; Dehydrated(D)@8; iTRAQ8plex(K)@9		0.00611173	1643.9	548.975	1643.9	548.973	3	10	42.1.1.1183.16	0	13.4556	45298	13.4246	1.56695	22.5387	1.53877	22.4117	1.02029	20.6946	323.76	55.23	459.93	67.75	476.63	69.28	0
671.34	671.34	81.33	66.47	59.83	P04114	APOB	Apolipoprotein B-100	0	auto - discordant peptide type	0.000434512	78.59	LDNIYSSDK	iTRAQ8plex@N-term; iTRAQ8plex(Y)@5; iTRAQ8plex(K)@9		-0.0059551	1966.11	492.534	1966.11	492.536	4	9	26.1.1.1071.8	0	13.1881	12991	13.2594	0.99879	26.5275	1.07899	25.4842	0.927463	26.7684	294.49	52.54	266.66	52.35	304	55.32	0
671.34	671.34	81.33	66.47	59.83	P04114	APOB	Apolipoprotein B-100	0	auto - discordant peptide type	2	99	LDNIYSSDKFYK	iTRAQ8plex@N-term; iTRAQ8plex(K)@9; iTRAQ8plex(K)@12	missed K-F@9	0.998275	2405.34	602.342	2404.34	602.092	4	13	28.1.1.1318.9	0	23.9358	6454	23.9027	1.19449	15.2693	0.92109	16.2391	1.29934	16.2112	240.71	26.04	260.67	28.09	212.12	25.69	0
671.34	671.34	81.33	66.47	59.83	P04114	APOB	Apolipoprotein B-100	1	auto	0	99	LDVTTSIGR	iTRAQ8plex@N-term		-0.00273453	1264.73	633.371	1264.73	633.372	2	14	52.1.1.1149.14	1	12.2105	464810	12.1387	0.785055	3.33414	0.880927	3.14571	0.892895	3.5185	2167.01	45.02	1542.32	40.22	1826.36	43.14	0
671.34	671.34	81.33	66.47	59.83	P04114	APOB	Apolipoprotein B-100	1	auto	0	99	LDVTTSIGRR	iTRAQ8plex@N-term	missed R-R@9	0.030573	1420.86	474.628	1420.83	474.617	3	13	67.1.1.994.8	1	10.7468	37400	10.7278	0.819151	4.08602	1.18786	3.58779	0.690936	4.03555	1408.6	36.3	1046.08	33.17	1600.81	39.96	0
671.34	671.34	81.33	66.47	59.83	P04114	APOB	Apolipoprotein B-100	0	auto - discordant peptide type	0	99	LEIQSQVDSQHVGH	iTRAQ8plex@N-term	cleaved H-S@C-term	-0.000487953	1879.97	627.664	1879.97	627.664	3	17	9.1.1.1188.16	0	12.0762	74979	12.0454	0.632771	5.5888	0.633166	5.42139	1.00131	6.30703	896.06	28.93	514.04	23.45	542.8	23.64	0
671.34	671.34	81.33	66.47	59.83	P04114	APOB	Apolipoprotein B-100	0	auto - discordant peptide type	0	65.32	LEIQSQVDSQHVGH	iTRAQ8plex@N-term; Deamidated(Q)@10	cleaved H-S@C-term	0.018546	1880.97	627.998	1880.95	627.992	3	10	9.1.1.1186.16	0	11.9875	49353	12.0454	0.537496	21.99	0.441816	22.9724	1.21892	26.9473	654.68	78.17	319.02	58.91	276.73	54.31	0
671.34	671.34	81.33	66.47	59.83	P04114	APOB	Apolipoprotein B-100	0	auto - discordant peptide type	0	99	LEIQSQVDSQHVGHSVLTAK	iTRAQ8plex@N-term; Deamidated(Q)@10; iTRAQ8plex(K)@20		-0.00254603	2784.52	697.138	2784.52	697.138	4	17	8.1.1.1237.16	0	13.5144	36306	13.5723	0.540075	18.3173	0.436328	19.2451	1.24017	22.5221	939.67	93.65	460.09	70.71	392.26	64.58	0
671.34	671.34	81.33	66.47	59.83	P04114	APOB	Apolipoprotein B-100	0	auto - discordant peptide type	0	99	LEIQSQVDSQHVGHSVLTAK	iTRAQ8plex@N-term; Deamidated(Q)@4; iTRAQ8plex(K)@20		-8.92469e-05	2784.52	557.912	2784.52	557.912	5	13	8.1.1.1250.8	0	14.0876	108411	13.9779	1.14685	17.8888	1.17894	17.5112	0.974666	17.6972	598.84	74.97	622.63	79.56	675.44	82.7	0
671.34	671.34	81.33	66.47	59.83	P04114	APOB	Apolipoprotein B-100	0	auto - discordant peptide type	0	99	LEIQSQVDSQHVGHSVLTAK	iTRAQ8plex@N-term; Deamidated(Q)@6; iTRAQ8plex(K)@20		0.00369949	2784.53	697.139	2784.52	697.138	4	16	7.1.1.1254.18	0	13.6429	50071	13.7433	0.814944	18.1714	0.479415	21.6868	1.70317	23.1529	707.53	81.36	522.74	73.55	324.52	59.67	0
671.34	671.34	81.33	66.47	59.83	P04114	APOB	Apolipoprotein B-100	1	auto	0	99	LEIQSQVDSQHVGHSVLTAK	iTRAQ8plex@N-term; iTRAQ8plex(K)@20		0.0215147	2783.56	557.719	2783.54	557.715	5	11	25.1.1.1118.11	1	15.2055	17961	15.1834	0.920759	25.0837	1.56303	21.4708	0.590225	23.4951	348.09	57.1	290.57	55.14	520.53	72.11	0
671.34	671.34	81.33	66.47	59.83	P04114	APOB	Apolipoprotein B-100	0	auto - shared MS/MS	0.00130484	20.3	LELR	iTRAQ8plex@N-term	cleaved E-L@N-term; cleaved R-P@C-term	-0.00253128	833.525	417.77	833.528	417.771	2	6	54.1.1.1132.2	0	11.3093	629125	11.3924	1.1485	6.19611	1.40714	5.80303	0.817774	5.87328	499.74	21.66	520.34	23.04	672.77	25.96	0
671.34	671.34	81.33	66.47	59.83	P04114	APOB	Apolipoprotein B-100	0	auto - shared MS/MS	0.00392635	47.38	LEPLK	iTRAQ8plex@N-term; iTRAQ8plex(K)@5		-0.00324927	1206.78	604.395	1206.78	604.397	2	8	50.1.1.1030.14	0	12.0603	344952	11.8132	1.16782	22.0789	1.04792	22.4344	1.11657	22.5375	388.86	60.42	411.7	64.58	389.86	63.09	0
671.34	671.34	81.33	66.47	59.83	P04114	APOB	Apolipoprotein B-100	0	auto - discordant peptide type	0	99	LEVANMQAELVAK	iTRAQ8plex@N-term; iTRAQ8plex(K)@13	cleaved K-P@C-term	-0.00158555	2023.16	675.393	2023.16	675.394	3	17	2.1.1.1338.15	0	19.8002	33259	19.8155	0.417576	28.3784	0.760379	21.625	0.550232	29.9043	492.35	67.75	186.39	46.26	358.17	59.75	0
671.34	671.34	81.33	66.47	59.83	P04114	APOB	Apolipoprotein B-100	1	auto	0	99	LEVLNFDFQANAQLSNPK	iTRAQ8plex@N-term; iTRAQ8plex(K)@18		-0.00241291	2655.45	664.869	2655.45	664.869	4	12	1.1.1.1661.12	1	34.283	22830	34.2567	0.533517	25.7859	0.627768	23.4209	0.85151	28.7312	481.12	67.01	232.71	50.5	288.96	54.41	0
671.34	671.34	81.33	66.47	59.83	P04114	APOB	Apolipoprotein B-100	0	auto - shared MS/MS	0.00130484	20.59	LFLEETK	iTRAQ8plex@N-term; iTRAQ8plex(K)@7		0.0149005	1486.9	496.641	1486.89	496.636	3	7	66.1.1.1376.4	0	31.9673	526645	31.8688	1.29147	2.65085	1.08349	2.74431	1.19427	2.68608	2559.31	49.04	2996.55	54.89	2652.97	52.12	0
671.34	671.34	81.33	66.47	59.83	P04114	APOB	Apolipoprotein B-100	0	auto - discordant peptide type	0	28.79	LGNNPVSK	iTRAQ8plex@N-term; Deamidated(N)@4; iTRAQ8plex(K)@8		-0.00275388	1436.84	479.955	1436.84	479.956	3	9	39.1.1.1131.8	0	11.0734	29629	11.1003	1.3974	20.7552	1.2214	21.2531	1.14632	20.3564	401.87	61.48	509.12	71.41	469.6	69.28	0
671.34	671.34	81.33	66.47	59.83	P04114	APOB	Apolipoprotein B-100	1	auto	0	99	LGNNPVSK	iTRAQ8plex@N-term; iTRAQ8plex(K)@8		-0.00135525	1435.86	718.937	1435.86	718.938	2	14	64.1.1.1136.20	1	10.9045	217961	10.9114	0.997969	3.25187	1.01224	3.18875	0.987814	3.34276	1959.02	42.85	1772.43	42.65	1897.17	44.02	0
671.34	671.34	81.33	66.47	59.83	P04114	APOB	Apolipoprotein B-100	0	auto - discordant peptide type	0	73.66	LHVAGNLK	iTRAQ8plex@N-term; Deamidated(N)@6; iTRAQ8plex(K)@8		-0.0209725	1459.88	487.633	1459.9	487.64	3	10	53.1.1.1135.7	0	11.4509	56490	11.4335	1.18192	4.86471	0.735363	5.54832	1.61037	5.54964	793.59	27.29	850.35	29.26	558.32	24.31	0
671.34	671.34	81.33	66.47	59.83	P04114	APOB	Apolipoprotein B-100	1	auto	2	99	LHVAGNLK	iTRAQ8plex@N-term; iTRAQ8plex(K)@8		-0.00319959	1458.91	730.462	1458.91	730.464	2	14	75.1.1.1365.21	1	11.3966	94726	11.4455	1.60257	5.65879	1.44125	5.74964	1.11409	5.29038	508.3	21.89	738.5	27.11	700.88	26.7	0
671.34	671.34	81.33	66.47	59.83	P04114	APOB	Apolipoprotein B-100	1	auto	0	99	LIDVISMYR	iTRAQ8plex@N-term		-0.000856232	1412.8	707.407	1412.8	707.407	2	14	66.1.1.1372.14	1	31.8081	1876224	31.8688	1.5368	4.85559	1.60642	4.76265	0.958513	4.4159	703.97	25.75	980.81	31.32	1081.93	33	0
671.34	671.34	81.33	66.47	59.83	P04114	APOB	Apolipoprotein B-100	0	auto - discordant peptide type	0	69.41	LIDVISMYR	iTRAQ8plex@N-term; iTRAQ8plex(S)@6		0.00140587	1717.01	573.343	1717.01	573.343	3	11	80.1.1.1729.13	0	43.6602	12320	43.5882	0.917254	29.1495	0.902152	28.9051	1.01871	30.8959	128.13	24.49	106.55	23.45	110.59	23.98	0
671.34	671.34	81.33	66.47	59.83	P04114	APOB	Apolipoprotein B-100	0	auto - discordant peptide type	0	99	LIDVISMYR	iTRAQ8plex@N-term; Oxidation(M)@7		-0.00259774	1428.79	715.404	1428.8	715.405	2	14	65.1.1.1329.19	0	30.7212	69464	30.6836	1.27355	21.2756	1.45536	20.3442	0.876769	19.9556	401.25	61.4	463.28	68.48	558.69	74.9	0
671.34	671.34	81.33	66.47	59.83	P04114	APOB	Apolipoprotein B-100	0	auto - shared MS/MS	0	16.32	LILR	iTRAQ8plex@N-term	cleaved Y-L@N-term	-0.00387839	817.565	409.79	817.569	409.792	2	6	86.1.1.1123.2	0	14.8195	26231	14.8124	1.32088	25.6559	1.11811	26.4978	1.18363	25.781	270.23	50.4	323.6	57.01	289.07	54.41	0
671.34	671.34	81.33	66.47	59.83	P04114	APOB	Apolipoprotein B-100	0	auto - discordant peptide type	0	76.03	LIVAM	iTRAQ8plex@N-term	cleaved M-S@C-term	-0.00298945	849.527	425.771	849.53	425.772	2	7	77.1.1.1540.3	0	34.9614	116452	34.6048	1.28496	11.3212	0.840326	12.7524	1.53208	12.5299	140.48	11.49	163.65	12.81	112.94	11.05	0
671.34	671.34	81.33	66.47	59.83	P04114	APOB	Apolipoprotein B-100	0	auto - discordant peptide type	0	38.63	LIVAM	iTRAQ8plex@N-term; Oxidation(M)@5	cleaved M-S@C-term	-0.00329077	865.522	433.768	865.525	433.77	2	8	78.1.1.1108.5	0	16.0038	240870	15.6681	0.166045	9.73316	0.272375	6.60703	0.610801	11.0176	1094.49	31.91	164.76	15.3	285.21	16.91	0
671.34	671.34	81.33	66.47	59.83	P04114	APOB	Apolipoprotein B-100	0	auto - discordant peptide type	2	99	LIVAMSSWLQK	iTRAQ8plex@N-term; Deamidated(Q)@10; iTRAQ8plex(K)@11		-0.00137661	1884.1	629.04	1884.1	629.041	3	14	49.1.1.1895.8	0	69.7816	30986	69.7646	0.714936	8.44374	0.510587	9.26336	1.40293	10.2447	358.37	18.3	232.28	15.62	175.06	13.53	0
671.34	671.34	81.33	66.47	59.83	P04114	APOB	Apolipoprotein B-100	1	auto	0	99	LIVAMSSWLQK	iTRAQ8plex@N-term; iTRAQ8plex(K)@11		-0.0028291	1883.11	628.712	1883.12	628.713	3	16	84.1.1.2218.10	1	69.6663	294367	69.6443	0.754628	3.42798	0.655991	3.51632	1.15259	3.89927	2099.17	44.31	1436.13	38.79	1317.44	37.05	0
671.34	671.34	81.33	66.47	59.83	P04114	APOB	Apolipoprotein B-100	0	auto - discordant peptide type	0	91.42	LIVAMSSWLQK	iTRAQ8plex@N-term; Oxidation(M)@5; Deamidated(Q)@10; iTRAQ8plex(K)@11		0.0227466	1900.12	634.38	1900.1	634.372	3	12	82.1.1.1637.19	0	38.6691	6559	38.7231	1.14297	27.7523	1.23244	26.8312	0.9292	27.1571	249.35	48.37	258.38	51.28	294.01	54.5	0
671.34	671.34	81.33	66.47	59.83	P04114	APOB	Apolipoprotein B-100	0	auto - discordant peptide type	0	99	LIVAMSSWLQK	iTRAQ8plex@N-term; Oxidation(M)@5; iTRAQ8plex(K)@11		0.00130791	1899.11	634.045	1899.11	634.044	3	14	83.1.1.1565.19	0	38.5035	43953	38.5572	0.925165	6.76517	1.6104	5.74559	0.575608	6.28815	477.27	21.14	400.31	20.47	735.33	26.91	0
671.34	671.34	81.33	66.47	59.83	P04114	APOB	Apolipoprotein B-100	1	auto	0	99	LKETIQK	iTRAQ8plex@N-term; iTRAQ8plex(K)@2; iTRAQ8plex(K)@7		-0.00169606	1771.13	591.385	1771.13	591.385	3	11	55.1.1.994.21	1	10.4158	81838	10.466	1.03135	3.032	0.952551	3.05628	1.08482	3.16949	2209.09	45.51	2065.53	45.95	2013.2	45.45	0
671.34	671.34	81.33	66.47	59.83	P04114	APOB	Apolipoprotein B-100	1	auto	0	99	LKQHIEAIDVR	iTRAQ8plex@N-term; iTRAQ8plex(K)@2	missed K-Q@2	0.0016501	1929.16	483.298	1929.16	483.298	4	13	35.1.1.1081.9	1	13.9151	163478	13.8951	1.12109	2.76285	1.07913	2.75466	1.04089	2.79855	2539.82	48.82	2581.41	51.23	2622.19	51.74	0
671.34	671.34	81.33	66.47	59.83	P04114	APOB	Apolipoprotein B-100	0	auto - shared MS/MS	0.00130484	20.55	LLGK	iTRAQ8plex@N-term; iTRAQ8plex(K)@4	cleaved Q-L@N-term	-0.00427585	1037.7	519.858	1037.71	519.86	2	6	78.1.1.982.14	0	10.4376	335090	10.5419	1.26841	28.1656	1.09306	28.926	1.16267	28.4399	228.84	46.37	263.15	51.48	239.31	49.4	0
671.34	671.34	81.33	66.47	59.83	P04114	APOB	Apolipoprotein B-100	1	auto	0	99	LLLMGAR	iTRAQ8plex@N-term		-0.00158623	1076.67	539.341	1076.67	539.341	2	12	84.1.1.1174.12	1	23.2641	96849	23.1933	1.27726	4.78674	1.33096	4.68661	0.961517	4.59455	790.77	27.26	915.68	30.41	1006.93	31.97	0
671.34	671.34	81.33	66.47	59.83	P04114	APOB	Apolipoprotein B-100	0	auto - discordant peptide type	0	27.23	LLLMGAR	iTRAQ8plex@N-term; Oxidation(M)@4		-0.00232859	1092.66	547.338	1092.66	547.339	2	8	83.1.1.1000.10	0	13.6234	71758	13.7794	1.03592	22.8171	1.30048	21.1529	0.798117	22.0846	390.39	60.5	366.64	61.4	485.72	69.93	0
671.34	671.34	81.33	66.47	59.83	P04114	APOB	Apolipoprotein B-100	0	auto - discordant peptide type	0	42.44	LLLMGAR	iTRAQ8plex@N-term; Trimethyl(R)@7		0.000748412	1118.72	560.365	1118.72	560.365	2	11	89.1.1.1820.6	0	43.2625	6960	43.278	1.30742	27.4376	1.17573	27.8922	1.11416	27.1943	71.29	14.18	84.5	15.97	80.19	15.68	0
671.34	671.34	81.33	66.47	59.83	P04114	APOB	Apolipoprotein B-100	0	auto - discordant peptide type	0	19.51	LLLQM	iTRAQ8plex@N-term	cleaved M-D@C-term	-0.00203722	920.565	461.29	920.567	461.291	2	7	75.1.1.1777.6	0	29.6799	20991	29.5786	1.70562	13.4791	0.637627	18.0422	2.68012	17.0284	86.93	9.06	134.42	11.49	53.03	7.81	0
671.34	671.34	81.33	66.47	59.83	P04114	APOB	Apolipoprotein B-100	0	auto - discordant peptide type	0	96.6	LLLQMDSSATAYGSTVSK	iTRAQ8plex@N-term; Dehydrated(S)@8; iTRAQ8plex(K)@18		0.000840541	2461.34	616.341	2461.33	616.341	4	13	65.1.1.1153.12	0	22.8984	18540	22.8722	0.972998	27.9097	1.00587	27.2229	0.969196	28.7396	270.01	50.3	238.18	49.5	259.84	51.58	0
671.34	671.34	81.33	66.47	59.83	P04114	APOB	Apolipoprotein B-100	1	auto	0	99	LLLQMDSSATAYGSTVSK	iTRAQ8plex@N-term; iTRAQ8plex(K)@18		0.00184354	2479.35	620.844	2479.35	620.844	4	15	45.1.1.1686.8	1	40.907	99776	41.2935	0.703796	26.9716	1.0287	23.3876	0.685485	27.4377	358.4	57.88	228.68	49.4	352.73	59.67	0
671.34	671.34	81.33	66.47	59.83	P04114	APOB	Apolipoprotein B-100	0	auto - discordant peptide type	0	99	LLLQMDSSATAYGSTVSK	iTRAQ8plex@N-term; Oxidation(M)@5; iTRAQ8plex(K)@18		0.00151183	2495.34	624.843	2495.34	624.842	4	15	39.1.1.1234.17	0	15.6947	41303	15.7985	0.674812	28.6105	0.869302	25.59	0.777773	30.0442	327.47	55.32	200.34	46.26	272.35	52.35	0
671.34	671.34	81.33	66.47	59.83	P04114	APOB	Apolipoprotein B-100	1	auto	0	99	LLLQMDSSATAYGSTVSKR	iTRAQ8plex@N-term; iTRAQ8plex(K)@18	missed K-R@18	-0.000684929	2635.45	659.869	2635.45	659.869	4	14	62.1.1.1525.14	1	34.0975	19496	34.022	0.939556	30.8727	1.76177	25.8563	0.534336	28.2463	227.39	46.15	193.69	45.06	383.27	61.4	0
671.34	671.34	81.33	66.47	59.83	P04114	APOB	Apolipoprotein B-100	0	auto - discordant peptide type	0	98.51	LLSGGNTLHLVSTTK	Carbamyl@N-term; iTRAQ8plex(K)@15		0.00203558	1887.08	630.032	1887.07	630.032	3	12	67.1.1.1570.18	0	36.4532	33226	36.3732	1.26084	25.3762	1.27455	24.959	0.991157	24.5606	283.15	51.58	323.66	57.18	345.27	58.91	0
671.34	671.34	81.33	66.47	59.83	P04114	APOB	Apolipoprotein B-100	0	auto - discordant peptide type	0	99	LLSGGNTLHLVSTTK	iTRAQ8plex@N-term; Acetyl(S)@12; iTRAQ8plex(K)@15		-0.000590965	2190.28	548.578	2190.28	548.578	4	17	80.1.1.1443.17	0	30.8611	21909	30.7815	1.04541	7.39916	0.955416	7.48019	1.09632	7.73056	367.96	18.57	348.74	18.87	336.34	18.57	0
671.34	671.34	81.33	66.47	59.83	P04114	APOB	Apolipoprotein B-100	0	auto - discordant peptide type	0	98.29	LLSGGNTLHLVSTTK	iTRAQ8plex@N-term; Acetyl(S)@3; iTRAQ8plex(K)@15		-5.97133e-05	2190.28	548.578	2190.28	548.578	4	14	77.1.1.1395.18	0	28.5049	20234	28.5152	0.784039	23.5028	0.995204	21.332	0.789344	24.0753	437.25	63.95	310.8	57.18	416.32	64.65	0
671.34	671.34	81.33	66.47	59.83	P04114	APOB	Apolipoprotein B-100	0	auto - discordant peptide type	0	99	LLSGGNTLHLVSTTK	iTRAQ8plex@N-term; Deamidated(N)@6; iTRAQ8plex(K)@15		-0.0189356	2149.24	717.42	2149.26	717.426	3	17	60.1.1.1300.20	0	17.8498	24222	17.811	0.670986	28.716	1.0484	24.2569	0.641251	29.0222	327.48	55.32	199.21	46.26	328.47	57.18	0
671.34	671.34	81.33	66.47	59.83	P04114	APOB	Apolipoprotein B-100	1	auto	0	99	LLSGGNTLHLVSTTK	iTRAQ8plex@N-term; iTRAQ8plex(K)@15		0.00253204	2148.28	538.076	2148.27	538.076	4	14	72.1.1.1257.10	1	22.2403	17338	22.2588	0.438855	28.3625	1.85987	17.518	0.236417	26.9871	243.45	33.69	96.86	23.98	433.19	46.53	0
671.34	671.34	81.33	66.47	59.83	P04114	APOB	Apolipoprotein B-100	0	auto - discordant peptide type	0	99	LLSGGNTLHLVSTTK	iTRAQ8plex@N-term; iTRAQ8plex(S)@12; iTRAQ8plex(K)@15		-0.00878621	2452.47	614.125	2452.48	614.127	4	15	82.1.1.1095.20	0	14.8354	62084	14.8423	0.808503	4.15085	0.832445	4.01965	0.97312	4.44159	1370.26	35.81	1004.38	32.39	1091.3	33.33	0
671.34	671.34	81.33	66.47	59.83	P04114	APOB	Apolipoprotein B-100	0	auto - discordant peptide type	0	99	LLSSSSSVIDALQYK	iTRAQ8plex@N-term; iTRAQ8plex(K)@15	cleaved H-L@N-term	-0.000186955	2218.27	555.574	2218.27	555.574	4	15	45.1.1.1945.9	0	52.5229	32590	52.7244	0.634483	24.5077	1.05045	20.27	0.605178	24.7607	234.45	33.09	134.86	27.02	235.62	34.28	0
671.34	671.34	81.33	66.47	59.83	P04114	APOB	Apolipoprotein B-100	0	auto - discordant peptide type	0	97.71	LNDFQVPDLHIPEFQLPHISHTIEVPTFGK	iTRAQ8plex@N-term; Deamidated(Q)@15; Methyl(H)@21; iTRAQ8plex(K)@30	cleaved N-L@N-term	-0.00998446	4091.19	682.872	4091.2	682.874	6	13	2.1.1.1800.6	0	40.5368	15322	40.4781	0.824817	6.66389	0.716951	6.86344	1.15268	7.4675	523.66	22.14	391.58	20.17	359.19	19.42	0
671.34	671.34	81.33	66.47	59.83	P04114	APOB	Apolipoprotein B-100	0	auto - discordant peptide type	0	99	LNDFQVPDLHIPEFQLPHISHTIEVPTFGK	iTRAQ8plex@N-term; iTRAQ8plex(K)@30	cleaved N-L@N-term	0.00832087	4076.21	680.375	4076.2	680.374	6	12	1.1.1.1759.9	0	38.6568	15042	38.6821	0.905473	8.04223	0.696083	8.58535	1.30333	9.11529	338.52	17.8	277.89	16.91	225.44	15.3	0
671.34	671.34	81.33	66.47	59.83	P04114	APOB	Apolipoprotein B-100	0	auto - discordant peptide type	0	99	LNDFQVPDLHIPEFQLPHISHTIEVPTFGK	iTRAQ8plex@N-term; Oxidation(P)@17; iTRAQ8plex(K)@30	cleaved N-L@N-term	0.0181228	4092.21	683.043	4092.19	683.039	6	13	3.1.1.2025.4	0	40.5392	41324	40.5727	0.745293	7.09386	0.335721	9.60895	2.22428	10.229	491.95	21.45	332.4	18.6	158.01	13.53	0
671.34	671.34	81.33	66.47	59.83	P04114	APOB	Apolipoprotein B-100	1	auto	0.580044	99	LNELSFK	iTRAQ8plex@N-term; iTRAQ8plex(K)@7		-0.00338323	1457.87	486.963	1457.87	486.964	3	11	50.1.1.1311.5	1	24.4389	208410	24.6017	1.42419	3.27766	1.27652	3.33648	1.11784	3.17734	1597.51	38.77	2062.64	45.44	1951	44.67	0
671.34	671.34	81.33	66.47	59.83	P04114	APOB	Apolipoprotein B-100	1	auto	0	99	LNGEIQALELPQK	iTRAQ8plex@N-term; iTRAQ8plex(K)@13		-0.000934615	2060.21	687.743	2060.21	687.744	3	16	2.1.1.1389.14	1	22.082	323319	22.19	0.516265	4.47881	0.654368	3.95808	0.79048	4.93376	1639.7	39.12	767.45	29.09	1026.53	32.42	0
671.34	671.34	81.33	66.47	59.83	P04114	APOB	Apolipoprotein B-100	1	auto	0	99	LNGESNLR	iTRAQ8plex@N-term		-9.61678e-05	1205.67	402.896	1205.67	402.896	3	12	45.1.1.977.2	1	9.1896	37239	9.1351	1.57121	5.56267	1.50356	5.57376	1.04702	5.14881	530.73	22.36	756	27.46	763.45	27.86	0
671.34	671.34	81.33	66.47	59.83	P04114	APOB	Apolipoprotein B-100	1	auto	0.00744648	62.51	LNIPK	iTRAQ8plex@N-term; iTRAQ8plex(K)@5		-0.0043881	1191.78	596.895	1191.78	596.897	2	8	70.1.1.1022.19	1	11.8696	463162	11.9685	1.00617	3.63253	0.936113	3.64862	1.07692	3.80761	1560.91	38.25	1423.84	38.18	1397.95	37.79	0
671.34	671.34	81.33	66.47	59.83	P04114	APOB	Apolipoprotein B-100	0	auto - discordant peptide type	0	99	LPQQANDYLNSFNWER	iTRAQ8plex@N-term; Dehydrated(D)@7		0.0116992	2280.13	761.052	2280.12	761.048	3	16	48.1.1.1399.8	0	45.9165	18115	45.8832	0.787258	23.8698	1.22122	20.5608	0.645896	23.4855	127.22	18.89	90.8	16.97	148.64	21.14	0
671.34	671.34	81.33	66.47	59.83	P04114	APOB	Apolipoprotein B-100	0	auto - discordant peptide type	0	99	LPQQANDYLNSFNWER	iTRAQ8plex@N-term; iTRAQ8plex(S)@11		0.00176224	2602.34	651.592	2602.34	651.592	4	14	31.1.1.1425.14	0	24.1861	22041	24.1576	0.735549	8.90856	0.893976	8.15638	0.824378	9.32999	317.66	17.23	211.83	14.97	271.69	16.55	0
671.34	671.34	81.33	66.47	59.83	P04114	APOB	Apolipoprotein B-100	0	auto - discordant peptide type	0	99	LPQQANDYLNSFNWER	iTRAQ8plex@N-term; iTRAQ8plex(Y)@8		-0.0017093	2602.34	651.592	2602.34	651.592	4	14	33.1.1.1432.17	0	24.2766	19058	24.3342	0.854409	8.66075	0.827832	8.54921	1.0341	9.29613	303.42	16.85	235.03	15.62	240.31	15.62	0
671.34	671.34	81.33	66.47	59.83	P04114	APOB	Apolipoprotein B-100	1	auto	0	99	LPYTIITTPPLK	iTRAQ8plex@N-term; iTRAQ8plex(K)@12		-0.00139928	1964.22	655.746	1964.22	655.746	3	14	83.1.1.1656.18	1	42.6424	270668	43.0183	0.856453	5.38021	0.839387	5.30012	1.02231	5.76197	785.26	27.11	609.72	25.16	630.61	25.36	0
671.34	671.34	81.33	66.47	59.83	P04114	APOB	Apolipoprotein B-100	1	auto	0	99	LPYTIITTPPLKDFSLWEK	iTRAQ8plex@N-term; iTRAQ8plex(K)@12; iTRAQ8plex(K)@19		0.0039723	3173.85	794.471	3173.85	794.47	4	13	30.1.1.2339.14	1	69.5225	10173	69.5319	1.24399	23.7701	0.731704	27.6019	1.70342	27.3191	161.82	27.57	182.5	30.25	113.28	24.6	0
671.34	671.34	81.33	66.47	59.83	P04114	APOB	Apolipoprotein B-100	0	auto - shared MS/MS	0	35.17	LQELK	iTRAQ8plex@N-term; iTRAQ8plex(K)@5	cleaved T-L@N-term	-0.00266215	1237.78	413.602	1237.79	413.602	3	8	45.1.1.1073.3	0	13.4753	40137	13.5555	0.92754	4.24973	0.714266	4.53243	1.30111	4.78808	1194.74	33.45	1004.66	32.12	816.43	29.1	0
671.34	671.34	81.33	66.47	59.83	P04114	APOB	Apolipoprotein B-100	1	auto	0.0629839	93.94	LQGTSK	iTRAQ8plex@N-term; iTRAQ8plex(K)@6		-0.00102282	1240.76	621.387	1240.76	621.387	2	9	65.1.1.869.21	1	10.2119	14870	10.2171	0.719697	29.6123	1.12893	25.185	0.638736	29.5492	293.1	52.35	191.24	45.17	316.57	56.21	0
671.34	671.34	81.33	66.47	59.83	P04114	APOB	Apolipoprotein B-100	0	auto - discordant peptide type	0	20.5	LQQLK	iTRAQ8plex@N-term; Deamidated(Q)@2; iTRAQ8plex(K)@5		-0.00263685	1237.78	413.602	1237.79	413.602	3	8	43.1.1.1066.3	0	13.1961	54638	13.1402	0.747237	3.94227	0.766069	3.81522	0.977306	4.29146	1600.95	38.69	1084.55	33.78	1173.36	34.64	0
671.34	671.34	81.33	66.47	59.83	P04114	APOB	Apolipoprotein B-100	0	auto - discordant peptide type	0	18.27	LQQLK	iTRAQ8plex@N-term; Deamidated(Q)@3; iTRAQ8plex(K)@5		-0.00266214	1237.78	413.602	1237.79	413.602	3	8	45.1.1.1073.3	0	13.4753	40137	13.5555	0.92754	4.24973	0.714266	4.53243	1.30111	4.78808	1194.74	33.45	1004.66	32.12	816.43	29.1	0
671.34	671.34	81.33	66.47	59.83	P04114	APOB	Apolipoprotein B-100	0	auto - shared MS/MS	0.00348833	44.6	LQQLK	iTRAQ8plex@N-term; iTRAQ8plex(K)@5		-0.00257043	1236.8	619.407	1236.8	619.408	2	8	69.1.1.994.17	0	10.8184	101444	10.8304	0.794451	3.79271	0.744184	3.79636	1.06961	4.18499	1657.99	39.38	1194.16	35.31	1180.45	34.96	0
671.34	671.34	81.33	66.47	59.83	P04114	APOB	Apolipoprotein B-100	0	auto - discordant peptide type	0	99	LQSTTVMNPY	iTRAQ8plex@N-term	cleaved Y-M@C-term	-0.000255022	1456.75	729.384	1456.75	729.384	2	12	55.1.1.1244.12	0	21.4562	214373	21.5555	1.29225	11.3221	1.0795	11.7433	1.19939	11.4938	701.28	57.4	821.58	64.27	724.27	60.99	0
671.34	671.34	81.33	66.47	59.83	P04114	APOB	Apolipoprotein B-100	0	auto - discordant peptide type	0	71.57	LQSTTVMNPY	iTRAQ8plex@N-term; Oxidation(M)@7	cleaved Y-M@C-term	-0.00202996	1472.75	737.381	1472.75	737.382	2	11	48.1.1.670.18	0	13.6534	17135	13.662	1.12184	26.2679	1.27681	24.9937	0.880333	25.4525	140.69	25.69	143.09	27.02	171.86	29.33	0
671.34	671.34	81.33	66.47	59.83	P04114	APOB	Apolipoprotein B-100	1	auto	0	99	LQSTTVMNPYMK	iTRAQ8plex@N-term; iTRAQ8plex(K)@12		5.62952e-05	2020.09	674.372	2020.09	674.372	3	14	72.1.1.1226.15	1	20.9004	21368	20.8621	0.834901	25.943	0.982173	24.1625	0.851702	26.7021	172.04	28.37	130.22	26.08	161.66	28.55	0
671.34	671.34	81.33	66.47	59.83	P04114	APOB	Apolipoprotein B-100	0	auto - discordant peptide type	0	95.89	LQSTTVMNPYMK	iTRAQ8plex@N-term; Oxidation(M)@11; iTRAQ8plex(K)@12		0.0003634	2036.09	510.03	2036.09	510.03	4	11	71.1.1.1104.12	0	15.5439	18098	15.4284	1.48585	20.2067	0.899527	23.0422	1.65501	21.9383	411.11	62.21	553.79	74.16	353.8	61.48	0
671.34	671.34	81.33	66.47	59.83	P04114	APOB	Apolipoprotein B-100	0	auto - discordant peptide type	0	99	LQSTTVMNPYMK	iTRAQ8plex@N-term; Oxidation(M)@7; iTRAQ8plex(K)@12		0.00108207	2036.09	510.03	2036.09	510.03	4	12	72.1.1.1094.15	0	15.0526	26909	15.0679	1.38637	22.4207	1.59641	21.4671	0.870114	20.513	346.62	57.1	435.66	66.26	529.4	72.87	0
671.34	671.34	81.33	66.47	59.83	P04114	APOB	Apolipoprotein B-100	1	auto	0.0565055	93.24	LRLEPLK	iTRAQ8plex@N-term; iTRAQ8plex(K)@7	missed R-L@2	-0.00331961	1475.96	492.995	1475.96	492.996	3	10	64.1.1.1173.12	1	12.567	276202	12.6334	1.25802	3.09645	1.01462	3.24254	1.24229	3.19588	1900.11	42.25	2167.1	46.7	1844.45	43.53	0
671.34	671.34	81.33	66.47	59.83	P04114	APOB	Apolipoprotein B-100	0	auto - discordant peptide type	0.000434512	39.37	LSCDTK	iTRAQ8plex@N-term; Methylthio(C)@3; iTRAQ8plex(K)@6	cleaved H-L@N-term	-0.00542532	1319.7	440.907	1319.7	440.909	3	9	41.1.1.1146.5	0	11.7985	44009	11.7852	2.04901	4.11435	2.14428	4.05432	0.957419	3.419	873	28.74	1621.7	40.02	1790.94	42.38	0
671.34	671.34	81.33	66.47	59.83	P04114	APOB	Apolipoprotein B-100	1	auto	0	99	LSLPDFK	iTRAQ8plex@N-term; iTRAQ8plex(K)@7		-0.00262489	1426.86	476.628	1426.86	476.629	3	11	47.1.1.1126.4	1	28.9501	179511	28.94	1.3447	2.56417	1.06563	2.69798	1.26433	2.61513	2680.4	50.2	3267.68	57.23	2732.69	53.07	0
671.34	671.34	81.33	66.47	59.83	P04114	APOB	Apolipoprotein B-100	0	auto - discordant peptide type	0	19.64	LSNDMMGSYAEMK	iTRAQ8plex@N-term; iTRAQ8plex(Y)@9; iTRAQ8plex(K)@13		-0.000492421	2388.22	598.063	2388.23	598.064	4	9	30.1.1.1273.13	0	22.1761	66477	21.7999	2.39312	12.0801	1.70063	12.8682	1.40992	10.6544	95.88	9.54	208.02	14.25	156	12.73	0
671.34	671.34	81.33	66.47	59.83	P04114	APOB	Apolipoprotein B-100	0	auto - discordant peptide type	0	31.67	LSNVLQQVK	Carbamyl@N-term; iTRAQ8plex(K)@9		-0.00978895	1374.8	688.409	1374.81	688.414	2	9	63.1.1.1668.18	0	40.4047	10980	40.3697	1.05348	28.3777	1.14723	27.2443	0.920063	28.2162	249.55	48.37	238.34	49.4	273.9	52.44	0
671.34	671.34	81.33	66.47	59.83	P04114	APOB	Apolipoprotein B-100	0	auto - discordant peptide type	0	94.45	LSNVLQQVK	iTRAQ8plex@N-term; Deamidated(N)@3; iTRAQ8plex(K)@9		0.000274557	1637	546.673	1637	546.673	3	12	46.1.1.1539.7	0	34.0267	37731	34.0553	1.93776	28.6695	1.32386	31.1814	1.46655	27.5961	183.03	41.59	321.54	56.21	231.82	49.5	0
671.34	671.34	81.33	66.47	59.83	P04114	APOB	Apolipoprotein B-100	0	auto - discordant peptide type	0	99	LSNVLQQVK	iTRAQ8plex@N-term; Deamidated(Q)@6; iTRAQ8plex(K)@9		-0.00216441	1637	546.672	1637	546.673	3	12	47.1.1.1190.8	0	31.8049	47466	31.8318	1.00668	6.47855	0.977851	6.43094	1.03147	6.71748	490.78	21.45	447.91	21.42	459.14	21.66	0
671.34	671.34	81.33	66.47	59.83	P04114	APOB	Apolipoprotein B-100	0	auto - discordant peptide type	0	99	LSNVLQQVK	iTRAQ8plex@N-term; Deamidated(Q)@7; iTRAQ8plex(K)@9		-0.000651054	1637	546.673	1637	546.673	3	12	44.1.1.1528.4	0	33.7272	89657	33.8524	1.6478	5.83202	2.46191	5.35548	0.670615	4.79603	475.21	21.17	709.91	26.72	1119.29	33.27	0
671.34	671.34	81.33	66.47	59.83	P04114	APOB	Apolipoprotein B-100	1	auto	0	99	LSNVLQQVK	iTRAQ8plex@N-term; iTRAQ8plex(K)@9		0.00290099	1636.02	546.346	1636.01	546.345	3	11	65.1.1.1031.12	1	17.4878	20278	17.508	0.984257	24.6714	2.29054	19.9779	0.430537	21.6565	347.89	57.1	310.43	57.18	762.37	86.83	0
671.34	671.34	81.33	66.47	59.83	P04114	APOB	Apolipoprotein B-100	0	auto - discordant peptide type	0	60.59	LSNVLQQVK	iTRAQ8plex@N-term; iTRAQ8plex(S)@2; iTRAQ8plex(K)@9		-0.00282293	1940.22	486.061	1940.22	486.062	4	10	70.1.1.1164.7	0	18.1449	23183	18.0863	1.16027	17.088	0.966914	17.776	1.20229	17.8773	650.98	78.17	684.76	83.25	602.2	78.93	0
671.34	671.34	81.33	66.47	59.83	P04114	APOB	Apolipoprotein B-100	0	auto - discordant peptide type	0	70.38	LSNVLQQVK	iTRAQ8plex@N-term; Methyl(N)@3; iTRAQ8plex(K)@9		-0.00317954	1650.03	551.016	1650.03	551.017	3	11	67.1.1.1331.8	0	25.7164	22012	25.8326	10.1086	39.9968	7.88499	40.5183	1.28448	18.42	69.96	26.65	641.14	78.17	527.76	72.87	0
671.34	671.34	81.33	66.47	59.83	P04114	APOB	Apolipoprotein B-100	0	auto - discordant peptide type	0	36.46	LSNVLQQVK	iTRAQ8plex@N-term; Methyl(Q)@7; iTRAQ8plex(K)@9		-0.0053874	1650.02	551.015	1650.03	551.017	3	10	68.1.1.1352.13	0	26.6364	9204	26.6109	2.11974	28.2596	2.0772	28.2063	1.02245	23.6248	182.73	41.59	351.16	58.82	363.14	60.5	0
671.34	671.34	81.33	66.47	59.83	P04114	APOB	Apolipoprotein B-100	0	auto - discordant peptide type	0	95.26	LSNVLQQVK	iTRAQ8plex@N-term; Methyl(S)@2; iTRAQ8plex(K)@9		-0.0030069	1650.03	551.016	1650.03	551.017	3	12	68.1.1.1337.14	0	25.9769	22902	25.9487	4.87686	27.4574	4.84538	27.4068	1.00845	16.5575	157.69	39.12	697.2	82.04	731	85.15	0
671.34	671.34	81.33	66.47	59.83	P04114	APOB	Apolipoprotein B-100	0	auto - discordant peptide type	2	99	LSPSAQQASWQVSAR	iTRAQ8plex@N-term	cleaved F-L@N-term	0.0188217	1919.04	640.686	1919.02	640.68	3	15	61.1.1.838.19	0	13.456	34621	13.4645	1.06272	21.4138	0.917669	21.957	1.1603	22.5755	435.08	63.87	419.18	65.35	381.98	62.37	0
671.34	671.34	81.33	66.47	59.83	P04114	APOB	Apolipoprotein B-100	0	auto - discordant peptide type	0.00833099	93.09	LSQLQTY	iTRAQ8plex@N-term	cleaved Y-M@C-term	0.000556045	1155.64	578.83	1155.64	578.829	2	11	53.1.1.1259.8	0	16.9278	500443	16.9094	0.990878	3.50382	0.937216	3.50106	1.0593	3.66942	1693.44	39.84	1521.26	39.5	1518.43	39.37	0
671.34	671.34	81.33	66.47	59.83	P04114	APOB	Apolipoprotein B-100	0	auto - discordant peptide type	0	57.89	LSQLQTY	iTRAQ8plex@N-term; Deamidated(Q)@3	cleaved Y-M@C-term	0.0153534	1156.64	579.329	1156.63	579.321	2	10	52.1.1.1251.8	0	16.6862	241214	16.6256	1.47139	4.44085	1.14698	4.6974	1.28533	4.45013	856.32	28.39	1142.29	33.75	939.67	31.27	0
671.34	671.34	81.33	66.47	59.83	P04114	APOB	Apolipoprotein B-100	0	auto - discordant peptide type	0	19.52	LSQLQTY	iTRAQ8plex@N-term; iTRAQ8plex(Y)@7	cleaved Y-M@C-term	-0.00834548	1459.84	487.621	1459.85	487.624	3	9	76.1.1.1182.9	0	18.8053	14917	18.8156	1.0298	16.6229	1.02384	16.4044	1.00777	17.0497	220.81	24.92	206.15	25.16	216.29	25.75	0
671.34	671.34	81.33	66.47	59.83	P04114	APOB	Apolipoprotein B-100	0	auto - discordant peptide type	0	22.19	LTALTK	iTRAQ8plex@N-term; Dehydrated(T)@5; iTRAQ8plex(K)@6		-0.00323571	1235.8	412.942	1235.81	412.943	3	8	74.1.1.1399.4	0	13.9932	91858	13.9811	1.10665	27.9584	0.909129	29.189	1.21963	29.691	249.43	48.37	250.25	50.4	216.95	47.33	0
671.34	671.34	81.33	66.47	59.83	P04114	APOB	Apolipoprotein B-100	1	auto	0	94.89	LTALTK	iTRAQ8plex@N-term; iTRAQ8plex(K)@6		-0.00238995	1253.81	418.945	1253.82	418.946	3	10	74.1.1.1398.4	1	13.9475	1327058	13.9811	0.898416	0.900049	0.789468	0.920966	1.14021	0.98477	27200.1	159.59	22154.5	151.21	20544.3	145.84	0
671.34	671.34	81.33	66.47	59.83	P04114	APOB	Apolipoprotein B-100	0	auto - shared MS/MS	0	78.19	LTIFK	iTRAQ8plex@N-term; iTRAQ8plex(K)@5		-0.00720006	1228.79	615.404	1228.8	615.408	2	8	82.1.1.1225.10	0	20.5473	9477	20.5593	0.89981	26.1424	0.877815	25.7642	1.02704	27.6847	161.26	27.48	131.55	26.08	135.43	26.17	0
671.34	671.34	81.33	66.47	59.83	P04114	APOB	Apolipoprotein B-100	0	auto - discordant peptide type	0	99	LTISEQNIQR	iTRAQ8plex@N-term		-0.987062	1503.86	502.296	1504.85	502.624	3	14	45.1.1.1055.12	0	12.6777	61003	12.6072	2.93747	6.78735	4.38942	6.42702	0.670512	4.58287	287.29	16.55	765.08	27.46	1206.46	34.38	0
671.34	671.34	81.33	66.47	59.83	P04114	APOB	Apolipoprotein B-100	1	auto	0	99	LTLDIQNK	iTRAQ8plex@N-term; iTRAQ8plex(K)@8		-0.00332408	1551.94	518.321	1551.94	518.322	3	12	43.1.1.1166.12	1	17.6055	203378	17.6696	0.822501	3.66033	0.753172	3.69045	1.09417	4.03243	1739.86	40.35	1297.37	36.74	1253.7	35.99	0
671.34	671.34	81.33	66.47	59.83	P04114	APOB	Apolipoprotein B-100	1	auto	0.570248	99	LTLDIQNKK	iTRAQ8plex@N-term; iTRAQ8plex(K)@8; iTRAQ8plex(K)@9	missed K-K@8	-0.00139726	1984.24	497.068	1984.24	497.069	4	14	60.1.1.1181.8	1	12.5209	235252	12.5478	1.00089	1.78873	0.945934	1.78817	1.06015	1.86944	6458.4	77.8	5860.36	77.49	5844.82	77.24	0
671.34	671.34	81.33	66.47	59.83	P04114	APOB	Apolipoprotein B-100	0	auto - shared MS/MS	0.00480371	51.91	LTSLK	iTRAQ8plex@N-term; iTRAQ8plex(K)@5	cleaved L-L@N-term	-0.00399053	1168.76	585.387	1168.76	585.389	2	8	70.1.1.989.17	0	10.4131	32051	10.3807	1.17646	19.8821	1.23267	19.4728	0.956246	19.5433	478.31	67.01	510.15	71.97	564.08	76.29	0
671.34	671.34	81.33	66.47	59.83	P04114	APOB	Apolipoprotein B-100	0	auto - discordant peptide type	0	61.29	LVELAH	iTRAQ8plex@N-term	cleaved H-Q@C-term	-0.00148678	984.59	493.302	984.591	493.303	2	9	45.1.1.1125.6	0	15.8019	72303	15.92	0.946735	10.4632	1.02587	10.0377	0.924651	10.6909	195.35	13.53	167.67	13.15	191.73	13.93	0
671.34	671.34	81.33	66.47	59.83	P04114	APOB	Apolipoprotein B-100	0	auto - discordant peptide type	0	99	LVELAHQYK	iTRAQ8plex@N-term; Deamidated(Q)@7; iTRAQ8plex(K)@9		-0.00090188	1709	570.673	1709	570.673	3	13	10.1.1.1298.9	0	18.2576	17939	18.2829	1.15314	27.1062	1.13863	26.7889	1.0147	27.0237	259.98	49.4	271.79	52.54	283.21	53.48	0
671.34	671.34	81.33	66.47	59.83	P04114	APOB	Apolipoprotein B-100	0	auto - discordant peptide type	0	41.69	LVELAHQYK	iTRAQ8plex@N-term; iTRAQ8plex(H)@6; iTRAQ8plex(K)@9		0.00139687	2012.22	504.062	2012.22	504.062	4	10	69.1.1.1207.9	0	20.2372	17495	20.2625	0.740368	20.444	0.96107	18.3297	0.771851	21.0424	601.06	74.97	403.44	65.35	552.66	74.23	0
671.34	671.34	81.33	66.47	59.83	P04114	APOB	Apolipoprotein B-100	1	auto	2	99	LVELAHQYK	iTRAQ8plex@N-term; iTRAQ8plex(K)@9		-0.00116299	1708.01	855.013	1708.01	855.014	2	16	58.1.1.1232.21	1	15.0699	87487	15.1199	1.27048	3.87031	1.40428	3.72885	0.90647	3.66075	1213.38	33.76	1397.58	37.6	1630.18	40.47	0
671.34	671.34	81.33	66.47	59.83	P04114	APOB	Apolipoprotein B-100	0	auto - discordant peptide type	0	99	LVELAHQYK	iTRAQ8plex@N-term; iTRAQ8plex(Y)@8; iTRAQ8plex(K)@9		-0.00385245	2012.21	504.061	2012.22	504.062	4	14	69.1.1.1225.10	0	21.061	169549	20.946	1.10341	2.57519	1.23214	2.46063	0.897259	2.51687	2953.83	52.64	2954.86	54.93	3482.02	59.08	0
671.34	671.34	81.33	66.47	59.83	P04114	APOB	Apolipoprotein B-100	0	auto - discordant peptide type	0	31.34	LVGFIDDAVK	iTRAQ8plex@N-term; Dehydrated(D)@7; iTRAQ8plex(K)@10		-0.038662	1665.95	556.325	1665.99	556.338	3	11	54.1.1.1489.7	0	27.1519	1932	27.1355	1.1553	6.4715	0.686039	7.50323	1.68728	7.53802	453.89	20.64	475.4	21.89	297.91	17.78	0
671.34	671.34	81.33	66.47	59.83	P04114	APOB	Apolipoprotein B-100	1	auto	0	99	LVGFIDDAVKK	iTRAQ8plex@N-term; iTRAQ8plex(K)@10; iTRAQ8plex(K)@11	missed K-K@10	-0.00292274	2116.3	530.082	2116.3	530.083	4	14	35.1.1.1798.5	1	45.905	108013	46.2479	1.22537	25.6523	1.22695	25.3325	1.00065	25.1325	281.11	51.38	312.29	56.21	329.98	57.88	0
671.34	671.34	81.33	66.47	59.83	P04114	APOB	Apolipoprotein B-100	1	auto	0.546682	99	LVTELR	iTRAQ8plex@N-term		0.00385176	1033.65	517.831	1033.64	517.829	2	10	57.1.1.800.3	1	11.793	25204	11.7839	1.77601	22.2871	1.3801	23.4651	1.28937	21.1024	313.61	54.41	504.95	70.64	414.08	65.42	0
671.34	671.34	81.33	66.47	59.83	P04114	APOB	Apolipoprotein B-100	0	auto - discordant peptide type	0.00305075	87.33	LYPEKDEPTYILNIK	iTRAQ8plex@N-term; iTRAQ8plex(K)@5; iTRAQ8plex(K)@15	cleaved F-L@N-term	-0.00903302	2747.58	687.902	2747.59	687.904	4	11	1.1.1.1338.13	0	19.7786	53550	19.7512	0.777397	3.68028	0.599745	3.9339	1.29872	4.30477	1783.34	40.84	1256.87	36.21	1023.26	32.73	0
671.34	671.34	81.33	66.47	59.83	P04114	APOB	Apolipoprotein B-100	0	auto - discordant peptide type	0	52.39	LYQLQVPL	iTRAQ8plex@N-term	cleaved L-L@C-term	-0.00187493	1276.77	639.391	1276.77	639.392	2	8	70.1.1.1945.17	0	52.8331	52065	53.1173	1.68922	17.0997	0.260923	35.6463	6.48655	34.8488	54.08	7.14	82.82	9	13.5	4.47	0
671.34	671.34	81.33	66.47	59.83	P04114	APOB	Apolipoprotein B-100	1	auto	0	89.84	LYSILK	iTRAQ8plex@N-term; iTRAQ8plex(K)@6		-0.00299114	1343.86	672.938	1343.86	672.939	2	10	84.1.1.1378.15	1	32.2029	106026	31.9551	1.14135	27.7398	1.50266	25.4691	0.761025	25.8572	250.42	48.48	259.12	51.48	360.01	59.58	0
671.34	671.34	81.33	66.47	59.83	P04114	APOB	Apolipoprotein B-100	1	auto	0	99	MDMTFSK	iTRAQ8plex@N-term; iTRAQ8plex(K)@7		-0.00719817	1466.77	734.39	1466.77	734.393	2	12	48.1.1.666.15	1	13.4746	72566	13.3547	1.368	13.4051	1.33311	13.3763	1.02816	12.8679	487.05	47.85	604.05	55.09	621.19	56.39	0
671.34	671.34	81.33	66.47	59.83	P04114	APOB	Apolipoprotein B-100	0	auto - discordant peptide type	0	38.13	MDMTFSK	iTRAQ8plex@N-term; Oxidation(M)@1; iTRAQ8plex(K)@7		0.000336158	1482.77	495.263	1482.77	495.263	3	9	38.1.1.1135.9	0	11.3842	48984	11.4094	1.07969	5.40304	1.85183	4.67877	0.584169	4.86135	683.44	25.32	668.98	26.31	1210.84	34.6	0
671.34	671.34	81.33	66.47	59.83	P04114	APOB	Apolipoprotein B-100	0	auto - discordant peptide type	0	38.65	MDMTFSK	iTRAQ8plex@N-term; Oxidation(M)@3; iTRAQ8plex(K)@7		-0.00311685	1482.76	495.262	1482.77	495.263	3	9	48.1.1.616.8	0	11.2356	50025	11.2625	1.32349	4.15227	1.02059	4.40453	1.2993	4.28824	1029.81	31.11	1235.64	35.2	1005.53	32.23	0
671.34	671.34	81.33	66.47	59.83	P04114	APOB	Apolipoprotein B-100	0	auto - discordant peptide type	0	98.1	MGIIIPDFAR	iTRAQ8plex@N-term	cleaved N-M@N-term	0.000711412	1435.82	479.613	1435.82	479.613	3	12	58.1.1.1593.3	0	31.1857	27521	31.1278	0.535813	9.15749	0.785941	7.69593	0.683067	9.70287	381.46	18.87	185.3	14.28	286.83	16.91	0
671.34	671.34	81.33	66.47	59.83	P04114	APOB	Apolipoprotein B-100	0	auto - discordant peptide type	0	81.53	MGIIIPDFAR	iTRAQ8plex@N-term; Oxidation(M)@1	cleaved N-M@N-term	0.000187173	1451.81	484.945	1451.81	484.944	3	11	49.1.1.1059.4	0	32.2125	16553	32.2015	0.863713	23.092	1.05522	21.2841	0.820102	23.3648	425.19	63.09	332.94	58.91	429.25	65.5	0
671.34	671.34	81.33	66.47	59.83	P04114	APOB	Apolipoprotein B-100	1	auto	0	99	MGLAFESTK	iTRAQ8plex@N-term; iTRAQ8plex(K)@9		-0.00270921	1590.89	531.303	1590.89	531.304	3	13	51.1.1.1197.10	1	19.2869	850883	19.5796	0.836566	2.34577	0.86236	2.27664	0.971968	2.49496	4196.28	62.67	3182.57	57.57	3462.09	59.49	0
671.34	671.34	81.33	66.47	59.83	P04114	APOB	Apolipoprotein B-100	0	auto - discordant peptide type	0	99	MGLAFESTK	iTRAQ8plex@N-term; Oxidation(M)@1; iTRAQ8plex(K)@9		-0.00202473	1606.88	536.635	1606.89	536.636	3	14	42.1.1.1145.12	0	11.7679	152187	11.7429	1.03583	3.25715	0.961006	3.2775	1.07995	3.39553	1909.28	42.31	1792.96	42.8	1755.42	42.39	0
671.34	671.34	81.33	66.47	59.83	P04114	APOB	Apolipoprotein B-100	0	auto - discordant peptide type	0	87.66	MIGEVIR	iTRAQ8plex@N-term	cleaved Q-M@N-term	-0.00332663	1120.65	561.335	1120.66	561.336	2	11	60.1.1.1242.8	0	15.27	45555	15.1625	1.70651	22.8955	2.17141	21.6414	0.78742	19.2447	303.21	53.48	469.1	68.48	629.9	78.99	0
671.34	671.34	81.33	66.47	59.83	P04114	APOB	Apolipoprotein B-100	0	auto - discordant peptide type	0	99	MIQFDQYIK	iTRAQ8plex@N-term; iTRAQ8plex(K)@9	cleaved Y-M@N-term	-0.00375438	1793	897.506	1793	897.508	2	16	51.1.1.1598.14	0	37.0458	53940	36.9635	0.715758	20.0128	1.1224	16.9628	0.638939	19.9496	321.99	38.79	208.94	33.39	345.76	41.29	0
671.34	671.34	81.33	66.47	59.83	P04114	APOB	Apolipoprotein B-100	0	auto - discordant peptide type	0	48.23	MIQFDQYIK	iTRAQ8plex@N-term; iTRAQ8plex(Y)@7; iTRAQ8plex(K)@9	cleaved Y-M@N-term	-0.00535568	2097.2	525.307	2097.21	525.309	4	10	65.1.1.1052.10	0	18.4178	18182	18.3954	1.45154	22.5247	1.04396	24.3225	1.39311	23.1682	334.73	56.12	440.49	66.26	334.32	58.91	0
671.34	671.34	81.33	66.47	59.83	P04114	APOB	Apolipoprotein B-100	0	auto - discordant peptide type	0	99	MIQFDQYIK	iTRAQ8plex@N-term; Oxidation(M)@1; iTRAQ8plex(K)@9	cleaved Y-M@N-term	-0.00303786	1808.99	604.005	1809	604.006	3	13	50.1.1.1310.8	0	24.4087	33660	24.5145	1.12501	21.2189	1.28124	20.2028	0.879763	20.557	215.29	31.78	219.58	33.47	263.9	36.4	0
671.34	671.34	81.33	66.47	59.83	P04114	APOB	Apolipoprotein B-100	1	auto	0.000869459	18.84	MNFK	iTRAQ8plex@N-term; iTRAQ8plex(K)@4		-0.00524376	1146.66	574.339	1146.67	574.341	2	6	75.1.1.1376.18	1	11.8776	206946	11.7541	1.00809	28.6269	0.803355	30.3427	1.25728	31.5023	250.72	48.48	229.14	48.37	192.7	45.06	0
671.34	671.34	81.33	66.47	59.83	P04114	APOB	Apolipoprotein B-100	0	auto - discordant peptide type	0	98.88	MYQMDIQQELQR	iTRAQ8plex@N-term; iTRAQ8plex(Y)@2		0.00138698	2190.14	548.542	2190.14	548.542	4	13	32.1.1.1250.11	0	15.7777	16540	15.8455	0.7683	30.6034	1.37145	25.2862	0.561295	29.4071	263.03	49.6	183.21	44.16	345.12	58.14	0
671.34	671.34	81.33	66.47	59.83	P04114	APOB	Apolipoprotein B-100	0	auto - discordant peptide type	0	42.07	NALDFVTK	iTRAQ8plex@N-term; iTRAQ8plex(K)@8	cleaved N-N@N-term	-0.00549759	1514.89	505.969	1514.89	505.971	3	10	47.1.1.869.10	0	17.7047	22846	17.7283	0.952819	19.7558	0.622221	22.453	1.53429	23.4441	543.33	71.34	469.34	69.28	323.44	58.91	0
671.34	671.34	81.33	66.47	59.83	P04114	APOB	Apolipoprotein B-100	0	auto - discordant peptide type	0	48.56	NDFFLH	iTRAQ8plex@N-term	cleaved H-Y@C-term	-0.000730145	1095.56	548.79	1095.57	548.79	2	9	49.1.1.763.9	0	19.094	23896	19.1193	0.781774	9.41842	0.921512	8.74934	0.850003	9.82985	272.62	15.97	193.22	14.25	240.35	15.62	0
671.34	671.34	81.33	66.47	59.83	P04114	APOB	Apolipoprotein B-100	0	auto - discordant peptide type	0	65.42	NFATSNK	iTRAQ8plex@N-term; Deamidated(N)@1; iTRAQ8plex(K)@7		0.00485587	1389.78	464.266	1389.77	464.264	3	9	34.1.1.959.8	0	8.3363	30823	8.4529	0.679692	26.8907	1.09831	22.5404	0.620051	26.9521	370.25	58.82	228.15	49.5	389.05	62.21	0
671.34	671.34	81.33	66.47	59.83	P04114	APOB	Apolipoprotein B-100	0	auto - discordant peptide type	0	99	NFATSNK	iTRAQ8plex@N-term; Deamidated(N)@6; iTRAQ8plex(K)@7		-0.00582628	1389.77	464.262	1389.77	464.264	3	9	28.1.1.962.11	0	8.1701	12575	8.2373	1.15552	28.9417	1.25565	27.8955	0.922036	28.1519	228.01	46.26	238.86	49.3	273.91	52.44	0
671.34	671.34	81.33	66.47	59.83	P04114	APOB	Apolipoprotein B-100	1	auto	2	99	NFATSNK	iTRAQ8plex@N-term; iTRAQ8plex(K)@7		-0.00320713	1388.78	463.935	1388.79	463.936	3	11	61.1.1.695.7	1	7.0573	102965	7.0399	0.919785	3.265	0.983343	3.1416	0.937176	3.36952	2041.56	43.73	1702.4	41.95	1920.67	44.14	0
671.34	671.34	81.33	66.47	59.83	P04114	APOB	Apolipoprotein B-100	0	auto - discordant peptide type	0.0486625	99	NFVASHIAN	iTRAQ8plex@N-term	cleaved N-I@C-term	0.000751909	1275.69	638.852	1275.69	638.851	2	14	59.1.1.1153.17	0	11.4704	378543	11.4823	0.84621	2.85991	1.00986	2.65711	0.839573	2.92776	2806.89	51.25	2153.36	47.4	2711.88	52.35	0
671.34	671.34	81.33	66.47	59.83	P04114	APOB	Apolipoprotein B-100	0	auto - discordant peptide type	0	84.48	NFVASHIAN	iTRAQ8plex@N-term; Deamidated(N)@9	cleaved N-I@C-term	-0.000468088	1276.67	639.343	1276.67	639.343	2	10	11.1.1.1144.17	0	12.3517	19411	12.3636	0.634061	25.9271	0.579074	26.2219	1.09708	30.1667	415.37	62.29	238.77	50.5	230.12	49.5	0
671.34	671.34	81.33	66.47	59.83	P04114	APOB	Apolipoprotein B-100	0	auto - discordant peptide type	0	99	NFVASHIANILNSEELDIQDLKK	iTRAQ8plex@N-term; iTRAQ8plex(K)@22; iTRAQ8plex(K)@23	missed K-K@22	-1.00014	3521.98	588.004	3522.98	588.171	6	15	2.1.1.1675.3	0	34.9397	32042	35.1151	0.747767	25.8991	0.819509	24.504	0.914225	27.6982	371.09	58.91	251.57	51.48	290.95	54.31	0
671.34	671.34	81.33	66.47	59.83	P04114	APOB	Apolipoprotein B-100	0	auto - discordant peptide type	0	73.88	NFVASHIANILNSEELDIQDLKK	iTRAQ8plex@N-term; iTRAQ8plex(S)@13; iTRAQ8plex(K)@22; iTRAQ8plex(K)@23	missed K-K@22	-0.005493	3827.18	638.871	3827.19	638.872	6	12	9.1.1.1558.11	0	28.9999	19695	29.0218	1.06936	15.9288	0.948213	16.2136	1.12995	16.6524	783.74	85.73	759.82	87.98	710.99	85.09	0
671.34	671.34	81.33	66.47	59.83	P04114	APOB	Apolipoprotein B-100	0	auto - discordant peptide type	0	99	NHLQLEGLFFTNGEHTSK	iTRAQ8plex@N-term; Ammonia-loss(N)@12; iTRAQ8plex(K)@18		-0.000418505	2662.4	533.486	2662.4	533.487	5	15	22.1.1.1506.2	0	32.3099	36175	32.258	1.01064	7.16305	0.906875	7.27792	1.11658	7.57925	400.08	19.36	366.57	19.36	347.12	18.87	0
671.34	671.34	81.33	66.47	59.83	P04114	APOB	Apolipoprotein B-100	0	auto - discordant peptide type	0	99	NHLQLEGLFFTNGEHTSK	iTRAQ8plex@N-term; Deamidated(N)@1; iTRAQ8plex(K)@18		0.00144117	2680.41	537.089	2680.41	537.089	5	11	5.1.1.1590.7	0	35.9963	9845	35.9793	0.401198	14.3644	0.300054	15.4764	1.33968	18.7315	196.33	13.53	71.41	9	56.36	7.81	0
671.34	671.34	81.33	66.47	59.83	P04114	APOB	Apolipoprotein B-100	0	auto - discordant peptide type	0	99	NHLQLEGLFFTNGEHTSK	iTRAQ8plex@N-term; Deamidated(N)@12; iTRAQ8plex(K)@18		-0.00150041	2680.41	671.109	2680.41	671.109	4	19	2.1.1.1308.13	0	18.4413	325841	18.3228	0.527919	3.87976	0.715566	3.34966	0.739193	4.19342	2148.52	44.78	1028.3	33.65	1470.87	38.57	0
671.34	671.34	81.33	66.47	59.83	P04114	APOB	Apolipoprotein B-100	0	auto - discordant peptide type	0	99	NHLQLEGLFFTNGEHTSK	iTRAQ8plex@N-term; Deamidated(N)@12; iTRAQ8plex(S)@17; iTRAQ8plex(K)@18		-0.00176575	2984.61	597.929	2984.61	597.93	5	14	20.1.1.1384.12	0	26.9935	14762	27.0592	0.654328	12.3354	2.03847	8.80121	0.321612	11.3227	184.1	13.11	109.21	11	359.04	18.57	0
671.34	671.34	81.33	66.47	59.83	P04114	APOB	Apolipoprotein B-100	0	auto - discordant peptide type	0	99	NHLQLEGLFFTNGEHTSK	iTRAQ8plex@N-term; Deamidated(Q)@4; iTRAQ8plex(K)@18		0.0038922	2680.41	537.09	2680.41	537.089	5	14	8.1.1.1373.7	0	19.6996	16279	19.6822	1.0489	7.60396	0.890952	7.84935	1.17956	8.09124	347.68	18.06	330.62	18.36	296.36	17.44	0
671.34	671.34	81.33	66.47	59.83	P04114	APOB	Apolipoprotein B-100	0	auto - discordant peptide type	0	99	NHLQLEGLFFTNGEHTSK	iTRAQ8plex@N-term; Dehydrated(E)@14; iTRAQ8plex(K)@18		0.00112642	2661.41	533.29	2661.41	533.29	5	15	61.1.1.1168.9	0	28.1357	10392	28.1609	1.20402	8.43192	0.456142	11.6706	2.64468	11.6341	260.93	15.65	284.82	16.88	113.87	11.4	0
671.34	671.34	81.33	66.47	59.83	P04114	APOB	Apolipoprotein B-100	0	auto - discordant peptide type	0	80.48	NHLQLEGLFFTNGEHTSK	iTRAQ8plex@N-term; Dehydrated(T)@16; iTRAQ8plex(K)@18		0.0030045	2661.42	533.29	2661.41	533.29	5	11	63.1.1.1406.3	0	28.4433	10308	28.433	1.12869	8.9932	0.574119	11.0836	1.96977	11.1711	237.66	14.93	243.19	15.65	130.54	11.92	0
671.34	671.34	81.33	66.47	59.83	P04114	APOB	Apolipoprotein B-100	1	auto	0	99	NHLQLEGLFFTNGEHTSK	iTRAQ8plex@N-term; iTRAQ8plex(K)@18		-0.00149796	2679.42	536.892	2679.42	536.892	5	13	23.1.1.1457.5	1	30.2148	56230	29.7655	0.583973	15.8579	1.23902	12.1677	0.472231	15.619	119.96	10.58	63.51	8.37	142.2	11.92	0
671.34	671.34	81.33	66.47	59.83	P04114	APOB	Apolipoprotein B-100	0	auto - discordant peptide type	0	99	NHLQLEGLFFTNGEHTSK	iTRAQ8plex@N-term; iTRAQ8plex(T)@11; Deamidated(N)@12; iTRAQ8plex(K)@18		0.00576091	2984.62	498.444	2984.61	498.443	6	12	21.1.1.1367.4	0	26.2672	10849	26.3466	1.49858	11.8966	2.09979	10.9584	0.715066	10.1695	118.96	10.58	161.62	12.77	238.98	15.3	0
671.34	671.34	81.33	66.47	59.83	P04114	APOB	Apolipoprotein B-100	0	auto - discordant peptide type	0	31.98	NIFNFK	iTRAQ8plex@N-term; Deamidated(N)@1; iTRAQ8plex(K)@6		-0.00229571	1390.8	464.609	1390.81	464.61	3	7	51.1.1.1379.4	0	27.2996	18947	27.3786	0.661351	8.80805	0.752763	8.17515	0.880266	9.54146	349.98	18.08	209.84	14.97	252.05	15.97	0
671.34	671.34	81.33	66.47	59.83	P04114	APOB	Apolipoprotein B-100	0	auto - discordant peptide type	0	77.42	NIFNFK	iTRAQ8plex@N-term; Deamidated(N)@4; iTRAQ8plex(K)@6		-0.00530268	1390.8	464.608	1390.81	464.61	3	8	49.1.1.972.6	0	28.3054	22544	28.2459	2.2253	8.62915	0.996798	10.4822	2.23677	9.25522	192.05	13.49	387.45	19.42	183.15	14.25	0
671.34	671.34	81.33	66.47	59.83	P04114	APOB	Apolipoprotein B-100	1	auto	0.104577	96.43	NIFNFK	iTRAQ8plex@N-term; iTRAQ8plex(K)@6		-0.00251802	1389.82	464.281	1389.82	464.282	3	8	76.1.1.1352.3	1	26.2784	189003	26.621	1.23674	29.0799	0.908518	31.2556	1.36391	30.9446	217.2	45.17	243.53	49.5	188.79	44.05	0
671.34	671.34	81.33	66.47	59.83	P04114	APOB	Apolipoprotein B-100	0	auto - discordant peptide type	0	79.93	NIILPVYDK	iTRAQ8plex@N-term; Dehydrated(D)@8; iTRAQ8plex(K)@9		0.00483217	1664.02	555.68	1664.01	555.678	3	11	76.1.1.1435.18	0	30.0505	52966	30.0608	0.966875	6.21936	0.792593	6.50645	1.22225	6.82633	544.33	22.58	477.14	22.11	412.76	20.69	0
671.34	671.34	81.33	66.47	59.83	P04114	APOB	Apolipoprotein B-100	1	auto	0	99	NIILPVYDK	iTRAQ8plex@N-term; iTRAQ8plex(K)@9		-0.00144545	1682.02	842.018	1682.02	842.019	2	14	40.1.1.1267.20	1	17.2741	122355	17.3695	0.783494	6.71605	0.837867	6.43449	0.936917	7.17722	534.54	22.36	379.69	19.95	428.49	20.95	0
671.34	671.34	81.33	66.47	59.83	P04114	APOB	Apolipoprotein B-100	0	auto - discordant peptide type	0	17.47	NIILPVYDK	iTRAQ8plex@N-term; Methyl(D)@8; iTRAQ8plex(K)@9		-9.1249e-05	1696.04	566.353	1696.04	566.353	3	9	40.1.1.1264.8	0	17.1219	15521	17.1047	3.50978	34.6398	3.6739	34.3135	0.957177	23.6154	105.36	31.78	335.25	57.1	370.33	60.58	0
671.34	671.34	81.33	66.47	59.83	P04114	APOB	Apolipoprotein B-100	1	auto	0.00174066	26.72	NIKIPSR	iTRAQ8plex@N-term; iTRAQ8plex(K)@3	missed K-I@3	-0.00654527	1434.91	479.31	1434.91	479.312	3	8	77.1.1.962.14	1	9.3364	19787	9.3533	0.436326	26.9079	0.573655	23.1445	0.76208	30.0559	523.37	69.86	207.03	48.37	287.24	54.31	0
671.34	671.34	81.33	66.47	59.83	P04114	APOB	Apolipoprotein B-100	1	auto	0.00305075	40.86	NLKHINIDQFVR	iTRAQ8plex@N-term; iTRAQ8plex(K)@3	missed K-H@3	-0.0274208	2104.21	527.06	2104.24	527.066	4	8	63.1.1.1215.5	1	19.9543	12502	19.8981	1.13314	6.84025	0.898879	7.2153	1.26306	7.29474	411.36	19.65	422.59	20.69	353.76	19.13	0
671.34	671.34	81.33	66.47	59.83	P04114	APOB	Apolipoprotein B-100	1	auto	0	92.7	NLLVALK	iTRAQ8plex@N-term; iTRAQ8plex(K)@7		-0.00278206	1377.91	460.312	1377.92	460.313	3	11	80.1.1.1366.6	1	27.379	228494	27.2345	0.975569	3.14552	0.666948	3.50129	1.46557	3.64534	2114.16	44.51	1869.86	43.7	1349.01	37.74	0
671.34	671.34	81.33	66.47	59.83	P04114	APOB	Apolipoprotein B-100	1	auto	0	99	NLQNNAEWVYQGAIR	iTRAQ8plex@N-term		0.00108041	2079.08	694.034	2079.08	694.034	3	20	51.1.1.1405.14	1	28.462	597231	27.9932	0.434087	11.4203	0.795051	8.72634	0.547044	11.9641	293.87	16.55	115.65	11.49	223.53	14.9	0
671.34	671.34	81.33	66.47	59.83	P04114	APOB	Apolipoprotein B-100	0	auto - discordant peptide type	0	99	NLQNNAEWVYQGAIR	iTRAQ8plex@N-term; iTRAQ8plex(Y)@10		-0.00435941	2383.28	596.828	2383.29	596.829	4	17	63.1.1.1260.7	0	21.9612	23987	21.7677	0.911053	16.2798	1.23389	14.6716	0.739788	15.9442	414.32	44.05	342.21	42.19	489.1	49.45	0
671.34	671.34	81.33	66.47	59.83	P04114	APOB	Apolipoprotein B-100	0	auto - discordant peptide type	0	99	NLQNNAEWVYQGAIR	iTRAQ8plex@N-term; Methyl(N)@1		-0.00230846	2093.09	698.705	2093.1	698.706	3	16	50.1.1.1374.20	0	27.241	22791	27.2022	0.388198	5.79132	0.332492	5.73394	1.1698	7.17334	1245.7	34.07	438.41	22.38	396.26	19.97	0
671.34	671.34	81.33	66.47	59.83	P04114	APOB	Apolipoprotein B-100	0	auto - discordant peptide type	0	99	NLQNNAEWVYQGAIR	iTRAQ8plex@N-term; Trimethyl(R)@15		0.000448418	2121.13	708.05	2121.13	708.05	3	17	83.1.1.1650.19	0	42.3692	43848	42.4696	0.463967	18.3745	0.866351	14.2204	0.536579	19.1278	107.22	10	45.1	7.14	88.87	9.54	0
671.34	671.34	81.33	66.47	59.83	P04114	APOB	Apolipoprotein B-100	0	auto - discordant peptide type	0	57.48	NMEVSVATTTK	iTRAQ8plex@N-term; Acetyl(S)@5; iTRAQ8plex(K)@11		-0.020545	1829.98	611.001	1830	611.008	3	12	43.1.1.1046.12	0	12.3223	11289	12.3343	0.771949	24.2611	0.666467	24.8878	1.16051	27.4757	206.36	31.06	144.42	27.48	131.58	26.08	0
671.34	671.34	81.33	66.47	59.83	P04114	APOB	Apolipoprotein B-100	1	auto	0	99	NMEVSVATTTK	iTRAQ8plex@N-term; iTRAQ8plex(K)@11		0.00151543	1787.99	597.005	1787.99	597.004	3	14	41.1.1.1140.15	1	11.547	837676	11.3808	0.894294	16.463	0.854344	16.3865	1.04879	17.6077	815.96	87.41	661.55	82.7	666.94	82.7	0
671.34	671.34	81.33	66.47	59.83	P04114	APOB	Apolipoprotein B-100	0	auto - discordant peptide type	0	99	NMEVSVATTTK	iTRAQ8plex@N-term; iTRAQ8plex(S)@5; iTRAQ8plex(K)@11		0.0148635	2092.21	524.06	2092.2	524.056	4	13	57.1.1.762.12	0	10.0967	25458	10.117	1.20406	15.5466	0.812298	17.2833	1.48516	17.2198	770	85.03	840.53	91.98	598.4	79.56	0
671.34	671.34	81.33	66.47	59.83	P04114	APOB	Apolipoprotein B-100	0	auto - discordant peptide type	0	99	NMEVSVATTTK	iTRAQ8plex@N-term; Oxidation(M)@2; iTRAQ8plex(K)@11		-0.00487229	1803.98	602.334	1803.99	602.336	3	16	36.1.1.972.21	0	8.9949	218810	9.0001	0.88393	3.28056	0.996947	3.09881	0.888354	3.36702	2074.27	44.07	1662.25	41.55	1978.44	44.63	0
671.34	671.34	81.33	66.47	59.83	P04114	APOB	Apolipoprotein B-100	1	auto	0	99	NNALDFVTK	iTRAQ8plex@N-term; iTRAQ8plex(K)@9		0.000445287	1628.94	543.986	1628.93	543.986	3	11	44.1.1.1148.9	1	16.8474	36683	16.8727	0.580697	8.27018	1.7325	5.86324	0.335827	7.81319	447.71	20.45	235.7	16.25	742.09	27.28	0
671.34	671.34	81.33	66.47	59.83	P04114	APOB	Apolipoprotein B-100	0	auto - discordant peptide type	0.000434512	34.89	NPNGYSF	iTRAQ8plex@N-term	cleaved F-S@C-term	-0.00225181	1101.54	551.776	1101.54	551.777	2	9	49.1.1.651.13	0	14.1665	38889	14.0967	1.25683	27.7542	1.42858	26.5765	0.881481	26.1765	237.38	47.22	270.48	52.35	324.44	57.18	0
671.34	671.34	81.33	66.47	59.83	P04114	APOB	Apolipoprotein B-100	0	auto - discordant peptide type	0	95.65	NPNGYSFSIPVK	iTRAQ8plex@N-term; Ammonia-loss(N)@3; iTRAQ8plex(K)@12		-0.00138532	1913.05	638.69	1913.05	638.691	3	12	68.1.1.1366.17	0	27.2734	33368	27.4668	0.894729	26.9448	0.805785	27.435	1.11253	29.383	304.38	53.39	246.9	50.5	234.65	49.5	0
671.34	671.34	81.33	66.47	59.83	P04114	APOB	Apolipoprotein B-100	0	auto - discordant peptide type	0	99	NPNGYSFSIPVK	iTRAQ8plex@N-term; Deamidated(N)@3; iTRAQ8plex(K)@12		-0.00227051	1931.06	644.694	1931.06	644.694	3	13	44.1.1.1384.15	0	27.2453	33151	27.3052	0.605462	8.99577	0.799232	7.9178	0.759022	9.56914	358.73	18.3	196.91	14.59	274.3	16.61	0
671.34	671.34	81.33	66.47	59.83	P04114	APOB	Apolipoprotein B-100	1	auto	0	99	NPNGYSFSIPVK	iTRAQ8plex@N-term; iTRAQ8plex(K)@12		-0.00379245	1930.07	644.365	1930.08	644.366	3	11	65.1.1.1024.16	1	17.176	472777	16.9156	0.709331	26.8418	0.967221	23.7248	0.734791	27.6258	359.46	57.97	231.16	49.6	332.63	57.88	0
671.34	671.34	81.33	66.47	59.83	P04114	APOB	Apolipoprotein B-100	0	auto - discordant peptide type	0	41.84	NPNGYSFSIPVK	iTRAQ8plex@N-term; iTRAQ8plex(S)@8; iTRAQ8plex(K)@12		-0.0119786	2234.27	559.575	2234.28	559.578	4	10	70.1.1.1141.19	0	17.1503	17648	17.1588	1.12136	19.7465	1.45334	18.2373	0.773072	18.6098	498.8	68.41	507.09	72.04	693.55	83.37	0
671.34	671.34	81.33	66.47	59.83	P04114	APOB	Apolipoprotein B-100	0	auto - discordant peptide type	0.473661	99	NRNNALDFVTK	iTRAQ8plex@N-term; Deamidated(N)@3; iTRAQ8plex(K)@11	missed R-N@2	-0.00251115	1900.06	634.361	1900.06	634.362	3	15	32.1.1.1188.19	0	13.0116	26339	12.9738	0.622049	23.8507	1.00154	19.811	0.622292	24.2767	502.14	68.48	283.18	55.41	481.15	69.14	0
671.34	671.34	81.33	66.47	59.83	P04114	APOB	Apolipoprotein B-100	0	auto - discordant peptide type	0	39.97	NSEEFAAAMSR	iTRAQ8plex@N-term; iTRAQ8plex(S)@2		-0.00309691	1819.93	455.99	1819.93	455.991	4	10	33.1.1.1155.5	0	11.7938	21765	11.7802	1.07928	6.05004	1.80261	5.25544	0.599891	5.45713	544.84	22.61	533.11	23.47	939.63	30.3	0
671.34	671.34	81.33	66.47	59.83	P04114	APOB	Apolipoprotein B-100	0	auto - discordant peptide type	0	96.86	NSEEFAAAMSR	iTRAQ8plex@N-term; Trimethyl(A)@7		0.00448695	1557.78	520.268	1557.78	520.266	3	14	63.1.1.1310.7	0	24.1905	45860	24.2655	1.19569	23.9607	1.0199	24.7261	1.17463	24.6839	325.92	55.32	353.3	59.75	318.02	57.18	0
671.34	671.34	81.33	66.47	59.83	P04114	APOB	Apolipoprotein B-100	0	auto - discordant peptide type	0	98.39	NSEEFAAAMSR	iTRAQ8plex@N-term; Trimethyl(R)@11		-0.000706238	1557.78	520.266	1557.78	520.266	3	14	61.1.1.1075.11	0	24.014	73756	24.0821	0.751292	8.72266	0.837804	8.22906	0.898475	9.30012	326.17	17.46	222.16	15.3	261.44	16.34	0
671.34	671.34	81.33	66.47	59.83	P04114	APOB	Apolipoprotein B-100	0	auto - discordant peptide type	0	93.12	NSLFFSAQPF	iTRAQ8plex@N-term	cleaved F-E@C-term	-0.000184968	1460.76	731.388	1460.76	731.388	2	11	69.1.1.1955.18	0	53.8886	48329	53.8526	1.93551	11.8539	0.652417	16.3737	2.97243	15.2221	106.86	10.05	187.51	13.53	66.7	8.94	0
671.34	671.34	81.33	66.47	59.83	P04114	APOB	Apolipoprotein B-100	0	auto - discordant peptide type	0	98.65	NSLFFSAQPFEITASTNNEGNLK	iTRAQ8plex@N-term; Acetyl(S)@6; iTRAQ8plex(K)@23		0.0129448	3178.65	795.67	3178.64	795.667	4	13	1.1.1.1622.17	0	32.5303	14442	32.4508	0.645841	22.6886	0.589935	22.8245	1.09689	26.2021	267.61	35.36	156.69	28.9	151.04	28.11	0
671.34	671.34	81.33	66.47	59.83	P04114	APOB	Apolipoprotein B-100	1	auto	0	99	NSLFFSAQPFEITASTNNEGNLK	iTRAQ8plex@N-term; iTRAQ8plex(K)@23		0.000492911	3136.63	785.165	3136.63	785.165	4	19	3.1.1.1748.16	1	28.1973	347577	28.3014	0.933827	7.52286	1.27085	6.79917	0.736228	7.33581	382.21	18.92	323.58	18.33	464.71	21.66	0
671.34	671.34	81.33	66.47	59.83	P04114	APOB	Apolipoprotein B-100	1	auto	0	96.57	NSLKIEIPLPFGGK	iTRAQ8plex@N-term; iTRAQ8plex(K)@4; iTRAQ8plex(K)@14	missed K-I@4	-0.0303953	2424.46	607.121	2424.49	607.129	4	11	62.1.1.1694.10	1	41.7516	15351	41.8213	0.487622	28.1505	0.649352	24.3006	0.75239	30.8911	435.22	63.72	192.4	46.26	270.38	52.44	0
671.34	671.34	81.33	66.47	59.83	P04114	APOB	Apolipoprotein B-100	1	auto	0	82.07	NTASLK	iTRAQ8plex@N-term; iTRAQ8plex(K)@6		-0.00632896	1240.75	414.592	1240.76	414.594	3	8	62.1.1.908.3	1	6.3578	40330	6.5317	0.787597	25.1046	0.913997	23.3844	0.863375	26.2082	381.65	59.75	272.51	53.48	333.73	57.97	0
671.34	671.34	81.33	66.47	59.83	P04114	APOB	Apolipoprotein B-100	0	auto - discordant peptide type	0	80.32	NTLELSNGVIVK	iTRAQ8plex@N-term; Ammonia-loss(N)@7; iTRAQ8plex(K)@12		-0.00214596	1877.11	626.709	1877.11	626.71	3	12	54.1.1.1244.10	0	16.2797	26609	16.3017	0.654328	31.3569	1.18105	25.3734	0.555094	30.9991	140.22	25.59	83.18	21.21	158.44	27.93	0
671.34	671.34	81.33	66.47	59.83	P04114	APOB	Apolipoprotein B-100	1	auto	0	99	NTLELSNGVIVK	iTRAQ8plex@N-term; iTRAQ8plex(K)@12		-0.00245566	1894.13	948.073	1894.13	948.075	2	20	51.1.1.1191.21	1	19.0394	177322	19.1328	0.783114	12.2848	1.47685	10.0517	0.531286	11.6633	161.43	12.29	114.61	11.05	228.09	14.97	0
671.34	671.34	81.33	66.47	59.83	P04114	APOB	Apolipoprotein B-100	0	auto - discordant peptide type	0	99	NTNFFHESGLEAHVALK	iTRAQ8plex@N-term; iTRAQ8plex(K)@17	cleaved M-N@N-term	1.00619	2522.36	631.597	2521.35	631.346	4	18	24.1.1.1318.4	0	24.035	3523	24.0536	0.98805	24.5259	1.15118	23.1097	0.859958	24.3987	69.36	11.4	62.13	11.31	76.39	12.41	0
671.34	671.34	81.33	66.47	59.83	P04114	APOB	Apolipoprotein B-100	1	auto	0.0168249	79.43	NYQLYK	iTRAQ8plex@N-term; iTRAQ8plex(K)@6		-0.00501639	1435.82	479.615	1435.83	479.617	3	9	64.1.1.1150.9	1	11.52	650483	11.4115	1.08461	2.33523	0.73939	2.59181	1.46974	2.64091	3610.03	58.19	3549.74	59.98	2553.7	51.83	0
671.34	671.34	81.33	66.47	59.83	P04114	APOB	Apolipoprotein B-100	0	auto - discordant peptide type	0	22.42	PALHFK	No iTRAQ8plex@N-term; iTRAQ8plex(K)@6	cleaved T-P@N-term	-0.00411524	1015.61	508.811	1015.61	508.813	2	9	78.1.1.1009.9	0	11.6135	117552	11.595	1.09991	5.10255	0.622224	6.04895	1.77113	6.13177	749.41	26.51	747.29	27.48	446.12	21.89	0
671.34	671.34	81.33	66.47	59.83	P04114	APOB	Apolipoprotein B-100	1	auto	0	99	PLSTLISSSQSCQYTLDAK	iTRAQ8plex@N-term; Methylthio(C)@12; iTRAQ8plex(K)@19	cleaved R-P@N-term	-0.00222405	2695.4	674.857	2695.4	674.858	4	16	34.1.1.2132.6	1	60.803	5341	60.8083	1.02848	29.8227	1.2927	27.4996	0.797148	28.7888	45.87	9.27	42.77	9.38	56.73	10.58	0
671.34	671.34	81.33	66.47	59.83	P04114	APOB	Apolipoprotein B-100	0	auto - discordant peptide type	0.0649968	98.74	PSLMIQK	iTRAQ8plex@N-term; iTRAQ8plex(K)@7	cleaved K-P@N-term	-0.00257623	1423.87	475.629	1423.87	475.63	3	11	72.1.1.1107.8	0	15.6282	76599	15.6102	0.523377	4.39811	0.667948	3.86926	0.785077	4.81818	1681.38	39.61	797.8	29.63	1074.47	32.98	0
671.34	671.34	81.33	66.47	59.83	P04114	APOB	Apolipoprotein B-100	0	auto - discordant peptide type	0	62.7	PSLMIQK	iTRAQ8plex@N-term; Oxidation(M)@4; iTRAQ8plex(K)@7	cleaved K-P@N-term	-0.00336947	1439.86	480.961	1439.86	480.962	3	10	72.1.1.1020.14	0	11.7786	95158	11.8407	0.494961	5.47122	0.75381	4.51545	0.657884	5.82777	1140.51	32.62	511.78	23.87	822.52	28.74	0
671.34	671.34	81.33	66.47	59.83	P04114	APOB	Apolipoprotein B-100	0	auto - discordant peptide type	0	35.9	QADINK	iTRAQ8plex@N-term; iTRAQ8plex(K)@6	cleaved S-Q@N-term	0.0111246	1295.78	432.933	1295.77	432.929	3	8	66.1.1.1322.3	0	29.5631	14111	29.5983	1.10339	26.834	0.709924	30.2841	1.55725	30.728	270.76	50.4	270.85	52.35	183.9	43.93	0
671.34	671.34	81.33	66.47	59.83	P04114	APOB	Apolipoprotein B-100	1	auto	0.315155	99	QAEAVLK	iTRAQ8plex@N-term; iTRAQ8plex(K)@7		-0.0146769	1365.83	683.922	1365.84	683.929	2	12	39.1.1.1129.18	1	11.0012	57853	11.0114	0.869269	5.44208	0.88775	5.30739	0.981079	5.75986	760.6	26.68	599.41	24.94	646	25.73	0
671.34	671.34	81.33	66.47	59.83	P04114	APOB	Apolipoprotein B-100	0	auto - shared MS/MS	0	19.27	QELK	iTRAQ8plex@N-term; iTRAQ8plex(K)@4	cleaved L-Q@N-term	-0.00629334	1124.7	563.355	1124.7	563.358	2	6	25.1.1.921.15	0	6.4345	17863	6.5407	0.499788	27.4763	0.604771	24.5661	0.828009	30.6743	446.96	64.58	202.52	47.33	258.61	51.38	0
671.34	671.34	81.33	66.47	59.83	P04114	APOB	Apolipoprotein B-100	1	auto	0	99	QELNGNTK	iTRAQ8plex@N-term; iTRAQ8plex(K)@8		-0.00157164	1510.86	756.435	1510.86	756.435	2	14	32.1.1.1106.20	1	9.3232	57130	9.3301	1.19035	5.59524	0.926955	5.93301	1.28664	5.92712	598.61	23.71	646	25.53	530.87	23.45	0
671.34	671.34	81.33	66.47	59.83	P04114	APOB	Apolipoprotein B-100	0	auto - discordant peptide type	0	23.68	QGFFPDSVNK	iTRAQ8plex@N-term; Deamidated(N)@9; iTRAQ8plex(K)@10		0.0432762	1746.98	583.335	1746.94	583.321	3	9	39.1.1.1187.17	0	13.5785	37545	13.4534	1.24572	21.3876	1.3573	20.7065	0.919566	20.4483	401.36	61.4	453.28	67.75	521.19	72.73	0
671.34	671.34	81.33	66.47	59.83	P04114	APOB	Apolipoprotein B-100	0	auto - discordant peptide type	0	48.44	QGFFPDSVNK	iTRAQ8plex@N-term; Deamidated(Q)@1; Deamidated(N)@9; iTRAQ8plex(K)@10		0.0264386	1747.95	583.658	1747.92	583.649	3	10	41.1.1.1200.11	0	14.1976	82644	14.2195	2.24363	6.24289	1.09848	7.35842	2.04643	6.42875	366.1	18.63	744.67	26.93	384.75	20.45	0
671.34	671.34	81.33	66.47	59.83	P04114	APOB	Apolipoprotein B-100	0	auto - discordant peptide type	0	17.48	QGFFPDSVNK	iTRAQ8plex@N-term; Deamidated(Q)@1; iTRAQ8plex(K)@10		0.0441264	1746.98	583.335	1746.94	583.321	3	9	38.1.1.1184.17	0	13.5738	46929	13.3578	1.24854	30.7057	1.56641	28.7787	0.798614	28.4022	194.82	42.78	220.52	47.33	291.96	54.31	0
671.34	671.34	81.33	66.47	59.83	P04114	APOB	Apolipoprotein B-100	1	auto	0	99	QGFFPDSVNK	iTRAQ8plex@N-term; iTRAQ8plex(K)@10		-0.000678881	1745.96	437.496	1745.96	437.496	4	13	38.1.1.1193.3	1	13.9631	45150	14.0432	0.78676	7.54929	0.858575	7.12341	0.918131	8.06687	817.4	27.66	625.27	25.51	700.99	26.68	218.5
671.34	671.34	81.33	66.47	59.83	P04114	APOB	Apolipoprotein B-100	1	auto	2	99	QHIEAIDVR	iTRAQ8plex@N-term		-0.000725264	1383.78	462.266	1383.78	462.267	3	14	12.1.1.1130.9	1	10.8054	1039614	10.8307	1.2243	2.21249	1.17311	2.21105	1.04566	2.19412	3779.02	59.57	4194.5	65.12	4241.35	65.76	0
671.34	671.34	81.33	66.47	59.83	P04114	APOB	Apolipoprotein B-100	0	auto - discordant peptide type	0	99	QHIEAIDVR	iTRAQ8plex@N-term; Deamidated(Q)@1		0.0187606	1384.78	462.601	1384.76	462.595	3	12	12.1.1.1132.3	0	10.8854	131878	10.8307	1.1523	3.76103	1.08745	3.77146	1.06169	3.80383	1350	35.59	1410.3	37.83	1404.52	37.88	0
671.34	671.34	81.33	66.47	59.83	P04114	APOB	Apolipoprotein B-100	0	auto - discordant peptide type	0	65.9	QHIEAIDVR	iTRAQ8plex@N-term; Trimethyl(R)@9		0.000204819	1425.82	476.282	1425.82	476.282	3	12	69.1.1.1078.7	0	14.5248	36085	14.6415	0.623405	29.9389	0.805325	26.5348	0.775604	31.7945	316.91	54.41	179.11	43.93	244.17	49.4	0
671.34	671.34	81.33	66.47	59.83	P04114	APOB	Apolipoprotein B-100	1	auto	0.0136762	84.38	QHLFVK	Gln->pyro-Glu@N-term; iTRAQ8plex(K)@6		-0.00169393	1057.62	529.818	1057.62	529.819	2	8	74.1.1.1379.19	1	13.131	70789	13.227	0.490154	9.92467	0.641939	8.57549	0.765031	10.8843	348.38	18.03	154.81	13.11	213.96	14.63	0
671.34	671.34	81.33	66.47	59.83	P04114	APOB	Apolipoprotein B-100	1	auto	0	81.39	QHLFVK	iTRAQ8plex@N-term; iTRAQ8plex(K)@6		-0.00547111	1378.85	460.624	1378.85	460.625	3	9	74.1.1.1345.4	1	11.596	275245	11.6738	0.925001	2.2657	0.819304	2.31787	1.13119	2.46241	4216.39	62.84	3535.87	60.34	3305	58.67	0
671.34	671.34	81.33	66.47	59.83	P04114	APOB	Apolipoprotein B-100	0	auto - discordant peptide type	0	24.79	QQLKR	iTRAQ8plex@N-term; Deamidated(Q)@1; iTRAQ8plex(K)@4	cleaved L-Q@N-term; missed K-R@4	-0.00671052	1280.8	427.939	1280.8	427.941	3	8	59.1.1.1090.2	0	8.6209	35118	8.4332	2.2426	8.37345	2.95759	7.95286	0.75972	6.38171	204.68	13.93	416.14	20.3	579.16	23.83	0
671.34	671.34	81.33	66.47	59.83	P04114	APOB	Apolipoprotein B-100	1	auto	0.127261	97.12	QSFDLSVK	iTRAQ8plex@N-term; iTRAQ8plex(K)@8		-0.000419743	1530.89	511.303	1530.89	511.303	3	12	42.1.1.1178.9	1	13.2215	763769	13.1576	0.953237	1.75638	0.78437	1.83309	1.21764	1.92973	6884.97	80.31	5949.99	78.13	5166.64	73.06	0
671.34	671.34	81.33	66.47	59.83	P04114	APOB	Apolipoprotein B-100	1	auto	0	66.62	QSWSVCK	Gln->pyro-Glu@N-term; Methylthio(C)@6; iTRAQ8plex(K)@7		-0.00275355	1169.55	585.782	1169.55	585.783	2	9	65.1.1.1099.11	1	20.5036	129815	20.3882	3.34701	16.7414	2.59496	17.3115	1.29231	12.6303	227.74	33.02	691.05	57.84	565.4	53.48	0
671.34	671.34	81.33	66.47	59.83	P04114	APOB	Apolipoprotein B-100	0	auto - discordant peptide type	0	39.22	QSWSVCK	iTRAQ8plex@N-term; Deamidated(Q)@1; Methylthio(C)@6; iTRAQ8plex(K)@7		-0.00533417	1491.76	498.261	1491.77	498.263	3	9	43.1.1.1188.3	0	18.552	15524	18.5436	1.64979	29.6227	1.85169	28.6744	0.892691	25.9294	183.5	41.59	274.46	52.35	325.08	57.1	0
671.34	671.34	81.33	66.47	59.83	P04114	APOB	Apolipoprotein B-100	1	auto	0	99	QSWSVCK	iTRAQ8plex@N-term; Methylthio(C)@6; iTRAQ8plex(K)@7		-0.00448077	1490.78	497.934	1490.78	497.935	3	11	69.1.1.1113.9	1	16.087	652343	16.0667	3.52221	1.83794	3.05157	1.86757	1.15647	1.31676	3736.25	59.85	11930.6	107.51	10908	104.73	0
671.34	671.34	81.33	66.47	59.83	P04114	APOB	Apolipoprotein B-100	1	auto	0	99	QTEATMTFK	iTRAQ8plex@N-term; iTRAQ8plex(K)@9		-0.00286091	1663.9	832.959	1663.91	832.961	2	16	40.1.1.1142.21	1	11.7278	440037	11.733	0.785626	2.52988	0.766236	2.49379	1.02729	2.76391	3756.7	59.28	2675.69	52.91	2753.94	53.18	0
671.34	671.34	81.33	66.47	59.83	P04114	APOB	Apolipoprotein B-100	0	auto - discordant peptide type	2	99	QTEATMTFK	iTRAQ8plex@N-term; Oxidation(M)@6; iTRAQ8plex(K)@9		-0.00246284	1679.9	560.974	1679.9	560.974	3	12	35.1.1.980.17	0	9.4326	186578	9.4907	0.732387	3.91518	0.999873	3.46377	0.733898	4.00111	1652.51	39.31	1097.23	34.12	1580.79	39.8	0
671.34	671.34	81.33	66.47	59.83	P04114	APOB	Apolipoprotein B-100	1	auto	0	99	QTIIVVLENVQR	iTRAQ8plex@N-term		0.0030679	1715.03	572.683	1715.02	572.682	3	17	52.1.1.1517.3	1	28.5081	410418	28.8416	0.785558	23.5794	1.11856	20.7512	0.703652	23.5874	130.43	19.13	92.89	17.15	139.58	20.49	0
671.34	671.34	81.33	66.47	59.83	P04114	APOB	Apolipoprotein B-100	0	auto - discordant peptide type	2	99	QTVNLQLQPY	iTRAQ8plex@N-term	cleaved Y-S@C-term	-0.000938487	1506.83	754.424	1506.83	754.425	2	15	50.1.1.1330.9	0	25.2948	602126	25.3001	1.21204	4.13421	0.834804	4.55832	1.4547	4.53487	1085.16	31.92	1192.41	34.64	866.69	30.18	0
671.34	671.34	81.33	66.47	59.83	P04114	APOB	Apolipoprotein B-100	1	auto	0.0231917	84.39	QVFLYPEK	iTRAQ8plex@N-term; iTRAQ8plex(K)@8		-0.00352755	1630.95	544.658	1630.95	544.659	3	10	41.1.1.1219.12	1	15.042	184376	15.0164	0.973268	3.4409	0.821648	3.56916	1.18683	3.74231	1772.69	40.76	1564.15	40.04	1393.49	38.04	0
671.34	671.34	81.33	66.47	59.83	P04114	APOB	Apolipoprotein B-100	1	auto	0	99	QVFLYPEKDEPTYILNIK	iTRAQ8plex@N-term; iTRAQ8plex(K)@8; iTRAQ8plex(K)@18		0.000422369	3121.78	625.364	3121.78	625.364	5	10	4.1.1.1724.8	1	49.1134	369304	48.8758	1.58161	22.1498	1.85178	21.2188	0.855761	19.4248	334.33	56.12	479.39	69.28	592.31	76.88	0
671.34	671.34	81.33	66.47	59.83	P04114	APOB	Apolipoprotein B-100	0	auto - discordant peptide type	0.000434512	58.07	QVFPGLN	iTRAQ8plex@N-term	cleaved N-Y@C-term	-0.00147048	1077.61	539.813	1077.61	539.814	2	9	63.1.1.1282.5	0	22.9283	67263	22.8722	2.02884	4.78833	2.12981	4.71687	0.954435	3.99107	646.94	24.74	1189.94	34.29	1318.23	36.4	0
671.34	671.34	81.33	66.47	59.83	P04114	APOB	Apolipoprotein B-100	0	auto - discordant peptide type	0.000434512	93.93	QVFPGLNY	iTRAQ8plex@N-term	cleaved Y-C@C-term	-0.00299199	1240.67	621.344	1240.68	621.345	2	12	62.1.1.1565.5	0	35.8484	30842	35.83	1.77967	23.6109	1.7948	23.3564	0.993491	20.6907	139.85	25.69	225.64	33.47	240.14	34.64	0
671.34	671.34	81.33	66.47	59.83	P04114	APOB	Apolipoprotein B-100	0	auto - discordant peptide type	0.0199966	98.56	QVFPGLNYC	iTRAQ8plex@N-term; Methylthio(C)@9	cleaved C-T@C-term	-0.00137728	1389.67	695.843	1389.67	695.844	2	12	67.1.1.1957.18	0	53.9155	69608	53.8797	2.58692	11.3495	2.60537	11.2767	0.994842	8.77323	106.23	10.05	249.14	15.62	264.79	16.25	0
671.34	671.34	81.33	66.47	59.83	P04114	APOB	Apolipoprotein B-100	0	auto - discordant peptide type	0	99	QVFPGLNYCTSGAY	iTRAQ8plex@N-term; Methylthio(C)@9	cleaved Y-S@C-term	-0.0023017	1868.87	935.443	1868.87	935.444	2	16	58.1.1.1677.21	0	35.0176	38387	35.0229	1.34672	23.6235	2.72888	20.2886	0.494464	19.4898	31.91	5.48	38.96	6.32	83.31	9	0
671.34	671.34	81.33	66.47	59.83	P04114	APOB	Apolipoprotein B-100	1	auto	0	68.21	QVSHAK	iTRAQ8plex@N-term; iTRAQ8plex(K)@6		-0.0041311	1276.77	426.596	1276.77	426.598	3	9	66.1.1.791.2	1	5.9543	3069	5.9327	0.404233	25.8912	0.860974	18.6937	0.470416	26.7381	61.15	7.55	22.41	5.1	50.37	7.07	0
671.34	671.34	81.33	66.47	59.83	P04114	APOB	Apolipoprotein B-100	0	auto - discordant peptide type	0.360514	99	RHIQNIDIQHLAGK	iTRAQ8plex@N-term; Deamidated(Q)@9; iTRAQ8plex(K)@14	missed R-H@1	-0.00543973	2251.3	563.831	2251.3	563.833	4	12	62.1.1.1005.14	0	10.7269	29180	10.6981	1.16942	4.33289	0.931556	4.56412	1.25777	4.57971	1007.81	30.76	1068.47	32.86	898.2	30.48	0
671.34	671.34	81.33	66.47	59.83	P04114	APOB	Apolipoprotein B-100	0	auto - discordant peptide type	0	43.07	RHIQNIDIQHLAGK	iTRAQ8plex@N-term; FMNH(H)@10; iTRAQ8plex(K)@14	missed R-H@1	0.0141559	2704.42	451.744	2704.41	451.742	6	11	63.1.1.1008.6	0	10.7132	38916	10.6513	0.827639	3.744	1.07827	3.3846	0.769047	3.77156	1663.9	39.46	1248.48	36.17	1716.49	41.45	0
671.34	671.34	81.33	66.47	59.83	P04114	APOB	Apolipoprotein B-100	1	auto	2	99	RNLQNNAEWVYQGAIR	iTRAQ8plex@N-term	missed R-N@1	0.00313797	2235.18	746.069	2235.18	746.068	3	21	58.1.1.1205.20	1	13.852	66115	13.8589	0.705554	8.4106	1.39582	6.72704	0.506455	8.09294	370.17	18.6	236.78	15.97	494.33	22.11	0
671.34	671.34	81.33	66.47	59.83	P04114	APOB	Apolipoprotein B-100	1	auto	0	73.54	SAFGYVFPK	iTRAQ8plex@N-term; iTRAQ8plex(K)@9	cleaved M-S@N-term	-0.00114969	1622.93	541.983	1622.93	541.983	3	10	79.1.1.1410.13	1	28.977	11145	28.9956	0.821546	7.83849	0.914273	7.41867	0.900318	8.20242	380.46	18.87	283.37	17.2	332.79	18.36	0
671.34	671.34	81.33	66.47	59.83	P04114	APOB	Apolipoprotein B-100	1	auto	2	99	SALVQVHASQPSSFHDFPDLGQEVALNANTK	iTRAQ8plex@N-term; iTRAQ8plex(K)@31	cleaved M-S@N-term	-0.000875548	3915.04	784.015	3915.04	784.015	5	20	5.1.1.1676.10	1	39.937	11270	39.9858	0.70425	22.7725	0.645998	22.8738	1.09229	25.8362	149.78	20.49	95.63	17.41	92.57	16.97	0
671.34	671.34	81.33	66.47	59.83	P04114	APOB	Apolipoprotein B-100	1	auto	0.000869459	22.95	SASVHLDSK	iTRAQ8plex@N-term; iTRAQ8plex(K)@9	cleaved M-S@N-term	0.00372344	1550.89	517.971	1550.89	517.97	3	8	71.1.1.1082.11	1	14.5437	19595	14.5211	0.606236	30.9286	1.09099	24.8485	0.556749	31.0146	305.18	53.39	167.73	42.78	318.54	56.21	0
671.34	671.34	81.33	66.47	59.83	P04114	APOB	Apolipoprotein B-100	0	auto - discordant peptide type	0.000869459	82.83	SEILAH	iTRAQ8plex@N-term	cleaved H-W@C-term	-0.00352786	972.551	487.283	972.555	487.285	2	9	27.1.1.1011.10	0	10.4674	45352	10.3146	1.83306	5.81715	1.29506	6.25417	1.41817	5.60261	454.29	20.71	754.96	27.28	562.87	24.1	0
671.34	671.34	81.33	66.47	59.83	P04114	APOB	Apolipoprotein B-100	0	auto - discordant peptide type	0	49.43	SEILAHWSPAK	iTRAQ8plex@N-term; Dehydrated(E)@2; iTRAQ8plex(K)@11		-0.00169969	1828.04	458.018	1828.05	458.019	4	11	76.1.1.1116.8	0	15.8692	12541	15.7594	0.862958	30.8911	1.22526	27.3285	0.705672	30.2548	238.23	47.22	186.38	44.16	279.26	52.54	0
671.34	671.34	81.33	66.47	59.83	P04114	APOB	Apolipoprotein B-100	0	auto - discordant peptide type	0	73.34	SEILAHWSPAK	iTRAQ8plex@N-term; iTRAQ8plex(H)@6; iTRAQ8plex(K)@11		-0.0045592	2150.26	431.059	2150.26	431.06	5	11	65.1.1.936.3	0	13.2085	29787	13.2437	2.03832	22.118	1.77466	22.5996	1.1508	19.3392	302.3	53.48	558.63	74.16	513.26	72.18	0
671.34	671.34	81.33	66.47	59.83	P04114	APOB	Apolipoprotein B-100	1	auto	0	99	SEILAHWSPAK	iTRAQ8plex@N-term; iTRAQ8plex(K)@11		-0.00311239	1846.05	616.358	1846.06	616.359	3	13	55.1.1.1156.13	1	17.5912	462318	17.4306	0.932516	5.37407	1.49877	4.66543	0.623393	5.07239	751.62	26.53	635.43	25.75	1077.75	32.88	0
671.34	671.34	81.33	66.47	59.83	P04114	APOB	Apolipoprotein B-100	0	auto - discordant peptide type	0	99	SEILAHWSPAK	iTRAQ8plex@N-term; iTRAQ8plex(S)@8; iTRAQ8plex(K)@11		-0.00895209	2150.25	538.57	2150.26	538.573	4	13	65.1.1.937.14	0	13.2714	25726	13.2437	1.01752	5.6481	1.19241	5.30871	0.854979	5.56157	643.29	24.56	593.42	24.7	733.87	27.07	0
671.34	671.34	81.33	66.47	59.83	P04114	APOB	Apolipoprotein B-100	0	auto - discordant peptide type	2	99	SFDYHQFVDETNDKIR	iTRAQ8plex@N-term; iTRAQ8plex(Y)@4; iTRAQ8plex(K)@14	missed K-I@14	0.00432295	2925.54	586.116	2925.54	586.115	5	13	12.1.1.1209.7	0	14.3112	37312	14.2928	1.01018	10.2172	0.984639	10.1297	1.02793	10.5748	984.73	67.93	901.84	67.97	927.64	68.81	0
671.34	671.34	81.33	66.47	59.83	P04114	APOB	Apolipoprotein B-100	0	auto - shared MS/MS	0.00130484	20.37	SFILK	iTRAQ8plex@N-term; iTRAQ8plex(K)@5	cleaved C-S@N-term	-0.00847585	1214.78	405.933	1214.78	405.936	3	7	81.1.1.1098.3	0	15.8229	69315	15.7706	1.08742	4.22815	1.41321	3.88735	0.77096	4.0044	1106.65	32.22	1090.99	33.45	1496.24	38.54	0
671.34	671.34	81.33	66.47	59.83	P04114	APOB	Apolipoprotein B-100	0	auto - discordant peptide type	0	97.45	SFSIPVK	iTRAQ8plex@N-term; iTRAQ8plex(K)@7	cleaved Y-S@N-term	-0.00301428	1384.85	693.433	1384.85	693.434	2	12	70.1.1.1141.20	0	17.1519	25363	17.0688	0.821391	30.661	0.9803	28.4024	0.83952	31.5477	249.01	48.27	185.43	44.05	233.54	48.48	0
671.34	671.34	81.33	66.47	59.83	P04114	APOB	Apolipoprotein B-100	0	auto - discordant peptide type	0	86.96	SGSSTASWIQNVDTK	iTRAQ8plex@N-term; Deamidated(Q)@10; Deamidated(N)@11; iTRAQ8plex(K)@15		0.0171854	2190.14	548.543	2190.13	548.539	4	11	29.1.1.1212.6	0	19.4883	115785	19.5537	1.04186	8.55486	1.26666	7.97709	0.824121	8.3092	1383.35	80.53	1306.64	81.91	1676.4	91.43	0
671.34	671.34	81.33	66.47	59.83	P04114	APOB	Apolipoprotein B-100	0	auto - discordant peptide type	0	99	SGSSTASWIQNVDTK	iTRAQ8plex@N-term; Deamidated(Q)@10; iTRAQ8plex(K)@15		0.0245875	2189.17	548.299	2189.14	548.293	4	13	28.1.1.1234.6	0	20.2497	111670	19.7915	1.03819	15.2344	0.904203	15.6142	1.15041	16.1443	261.32	27.11	245.96	27.44	226.06	26.38	0
671.34	671.34	81.33	66.47	59.83	P04114	APOB	Apolipoprotein B-100	1	auto	0	99	SGSSTASWIQNVDTK	iTRAQ8plex@N-term; iTRAQ8plex(K)@15		-0.00171748	2188.16	548.047	2188.16	548.047	4	14	30.1.1.1227.10	1	20.171	291431	19.7109	0.834591	17.4599	0.868427	16.8787	0.9629	18.5218	379.35	42.13	287.03	38.67	315.18	40.06	0
671.34	671.34	81.33	66.47	59.83	P04114	APOB	Apolipoprotein B-100	0	auto - discordant peptide type	0	95.63	SGSSTASWIQNVDTK	iTRAQ8plex@N-term; iTRAQ8plex(S)@3; iTRAQ8plex(K)@15		0.00284479	2492.37	624.099	2492.36	624.098	4	12	43.1.1.1102.17	0	14.7859	20095	14.7528	1.38033	27.8453	1.75755	26.0681	0.786892	24.9122	225.42	46.04	282.09	53.39	379.04	61.4	0
671.34	671.34	81.33	66.47	59.83	P04114	APOB	Apolipoprotein B-100	0	auto - discordant peptide type	0	96.78	SGSSTASWIQNVDTK	iTRAQ8plex@N-term; iTRAQ8plex(S)@4; iTRAQ8plex(K)@15		0.000293106	2492.36	624.098	2492.36	624.098	4	12	44.1.1.1104.19	0	14.9144	20213	14.8785	1.33065	23.8071	1.16803	24.3483	1.14144	23.6328	312.75	54.22	377.29	61.56	349.49	59.75	0
671.34	671.34	81.33	66.47	59.83	P04114	APOB	Apolipoprotein B-100	0	auto - discordant peptide type	0.000434512	85.13	SGVQMNTNFFH	iTRAQ8plex@N-term	cleaved H-E@C-term	0.000139411	1584.77	529.263	1584.77	529.263	3	11	67.1.1.1230.10	0	21.2257	22803	21.2027	0.940723	23.4502	1.31354	20.9955	0.71756	22.6397	391.79	60.58	334.14	58.91	492.36	69.93	0
671.34	671.34	81.33	66.47	59.83	P04114	APOB	Apolipoprotein B-100	0	auto - discordant peptide type	0	99	SGVQMNTNFFHESGLEAH	iTRAQ8plex@N-term	cleaved H-V@C-term	0.00343458	2308.09	770.37	2308.08	770.369	3	18	8.1.1.1321.21	0	17.3392	112668	17.4387	1.21297	7.70761	2.09956	6.73149	0.578847	6.7211	315.22	17.2	346.64	18.87	633.18	24.96	0
671.34	671.34	81.33	66.47	59.83	P04114	APOB	Apolipoprotein B-100	0	auto - discordant peptide type	0	99	SGVQMNTNFFHESGLEAH	iTRAQ8plex@N-term; Deamidated(N)@6	cleaved H-V@C-term	0.0218131	2309.09	770.704	2309.07	770.697	3	15	7.1.1.1332.20	0	17.2009	15272	17.0669	1.50797	6.83959	0.643211	8.79481	2.34898	8.43924	355.8	18.3	486.42	21.93	218.95	15.62	0
671.34	671.34	81.33	66.47	59.83	P04114	APOB	Apolipoprotein B-100	0	auto - discordant peptide type	0	99	SGVQMNTNFFHESGLEAH	iTRAQ8plex@N-term; Deamidated(N)@8	cleaved H-V@C-term	0.0806925	2309.15	770.724	2309.07	770.697	3	16	8.1.1.1322.20	0	17.3847	18639	17.4387	1.29888	5.75631	1.18416	5.84256	1.099	5.70714	541.62	22.56	637.79	25.34	613.61	25.14	0
671.34	671.34	81.33	66.47	59.83	P04114	APOB	Apolipoprotein B-100	0	auto - discordant peptide type	0	84.81	SGVQMNTNFFHESGLEAH	iTRAQ8plex@N-term; Oxidation(M)@5	cleaved H-V@C-term	0.0204838	2324.1	582.032	2324.08	582.027	4	11	9.1.1.1229.10	0	13.9428	20132	13.9664	2.42139	25.458	1.41875	28.3324	1.71001	23.8149	214.89	45.17	471.73	67.75	291.68	55.41	0
671.34	671.34	81.33	66.47	59.83	P04114	APOB	Apolipoprotein B-100	0	auto - discordant peptide type	0	38.33	SGVQMNTNFFHESGLEAHVALK	iTRAQ8plex@N-term; Deamidated(N)@8; Methyl(H)@11; iTRAQ8plex(K)@22		-0.00674485	3038.57	608.721	3038.57	608.722	5	11	26.1.1.1322.9	0	24.3482	20342	24.5037	1.10252	22.3777	0.91702	23.2545	1.20461	23.6777	195.08	30.25	194.99	31.46	171.15	29.66	0
671.34	671.34	81.33	66.47	59.83	P04114	APOB	Apolipoprotein B-100	1	auto	0	98.23	SGVQMNTNFFHESGLEAHVALK	iTRAQ8plex@N-term; iTRAQ8plex(K)@22		0.00769431	3023.58	605.724	3023.57	605.722	5	14	27.1.1.1488.7	1	31.7586	57976	31.8319	1.13119	5.58186	0.889612	5.92284	1.27401	5.99028	618.11	24.08	633.89	25.34	526.08	23.47	0
671.34	671.34	81.33	66.47	59.83	P04114	APOB	Apolipoprotein B-100	0	auto - discordant peptide type	0	99	SGVQMNTNFFHESGLEAHVALK	iTRAQ8plex@N-term; Oxidation(M)@5; iTRAQ8plex(K)@22		0.000769324	3039.57	760.9	3039.57	760.9	4	15	24.1.1.1350.8	0	25.4643	19960	25.6003	0.465766	30.8185	0.754612	24.7251	0.618421	32.6933	113.65	17.83	47.99	12.73	82.05	15.68	0
671.34	671.34	81.33	66.47	59.83	P04114	APOB	Apolipoprotein B-100	0	auto - discordant peptide type	0	29.62	SIQDWAK	iTRAQ8plex@N-term; iTRAQ8plex(K)@7	cleaved Y-S@N-term	0.000787177	1454.84	485.952	1454.83	485.952	3	9	38.1.1.1167.7	0	12.7965	26287	12.8251	1.11456	24.435	1.19772	23.613	0.932375	24.0684	326.16	55.32	329.57	57.97	373.74	61.4	0
671.34	671.34	81.33	66.47	59.83	P04114	APOB	Apolipoprotein B-100	0	auto - discordant peptide type	0	25.82	SIQDWAKR	iTRAQ8plex@N-term; iTRAQ8plex(K)@7	cleaved Y-S@N-term; missed K-R@7	-0.0178271	1610.92	537.98	1610.94	537.986	3	9	37.1.1.1235.11	0	15.3572	45368	15.3791	1.39217	4.96759	1.65848	4.72109	0.84105	4.50297	704.9	25.75	889.68	29.95	1118.47	33.45	0
671.34	671.34	81.33	66.47	59.83	P04114	APOB	Apolipoprotein B-100	1	auto	0	99	SISAALEHK	iTRAQ8plex@N-term; iTRAQ8plex(K)@9		-0.00392015	1562.92	782.467	1562.92	782.469	2	16	57.1.1.783.21	1	11.0533	75202	11.1501	0.662762	6.38078	0.763225	5.90073	0.870051	6.88923	665.7	24.94	399.99	20.66	486.09	22.16	0
671.34	671.34	81.33	66.47	59.83	P04114	APOB	Apolipoprotein B-100	0	auto - discordant peptide type	0	93.62	SISAALEHK	iTRAQ8plex@N-term; iTRAQ8plex(S)@3; iTRAQ8plex(K)@9		-0.00881447	1867.12	467.787	1867.13	467.79	4	11	61.1.1.770.6	0	10.3823	73095	10.4126	1.23505	3.76522	1.15155	3.78756	1.07459	3.74963	1298.94	34.93	1454.41	38.33	1431.06	38.17	0
671.34	671.34	81.33	66.47	59.83	P04114	APOB	Apolipoprotein B-100	1	auto	2	99	SKEVPEAR	iTRAQ8plex@N-term; iTRAQ8plex(K)@2		-0.00513031	1522.89	508.637	1522.89	508.638	3	12	25.1.1.897.9	1	5.3588	125582	5.3398	1.24004	2.73951	1.16017	2.75315	1.07092	2.72263	2448.72	47.96	2752.89	52.73	2717.98	52.59	0
671.34	671.34	81.33	66.47	59.83	P04114	APOB	Apolipoprotein B-100	1	auto	0	99	SKPTVSSSMEFK	iTRAQ8plex@N-term; iTRAQ8plex(K)@2; iTRAQ8plex(K)@12		-0.00416446	2239.26	560.822	2239.27	560.824	4	16	54.1.1.1134.19	1	11.4301	342968	11.3924	0.953106	1.88324	0.820983	1.93664	1.16318	2.04212	5992.6	74.93	5178.09	72.92	4706.9	69.61	0
671.34	671.34	81.33	66.47	59.83	P04114	APOB	Apolipoprotein B-100	0	auto - discordant peptide type	2	99	SKPTVSSSMEFK	iTRAQ8plex@N-term; iTRAQ8plex(K)@2; Oxidation(M)@9; iTRAQ8plex(K)@12		-0.00290478	2255.26	564.822	2255.26	564.822	4	16	47.1.1.697.7	0	10.1141	56613	10.0956	1.12325	10.208	0.837427	10.991	1.34391	11.1279	927.24	65.95	944.24	69.14	742.89	62.25	0
671.34	671.34	81.33	66.47	59.83	P04114	APOB	Apolipoprotein B-100	1	auto	0	99	SLDEHYHIR	iTRAQ8plex@N-term		4.50409e-05	1472.77	491.93	1472.77	491.93	3	13	27.1.1.957.13	1	8.0713	269685	8.2272	0.913877	28.9476	0.915099	28.4123	1.0006	30.4346	260.55	49.4	215.87	47.22	228.11	48.27	0
671.34	671.34	81.33	66.47	59.83	P04114	APOB	Apolipoprotein B-100	0	auto - discordant peptide type	0	98.14	SLDEHYHIR	iTRAQ8plex@N-term; iTRAQ8plex(Y)@6		-0.000934375	1776.97	445.25	1776.97	445.251	4	13	60.1.1.1136.6	0	10.4818	172579	10.512	0.808282	2.31886	0.910367	2.18235	0.889583	2.42549	4395.1	64.12	3220.66	58.05	3827.99	62.13	0
671.34	671.34	81.33	66.47	59.83	P04114	APOB	Apolipoprotein B-100	1	auto	0.0985417	96.18	SLHMYANR	iTRAQ8plex@N-term		-0.00388709	1294.67	432.565	1294.68	432.566	3	12	77.1.1.945.4	1	8.569	80756	8.5584	0.612824	5.70144	0.759062	5.13407	0.808907	6.14381	884.44	28.74	491.38	23.02	642.29	25.53	0
671.34	671.34	81.33	66.47	59.83	P04114	APOB	Apolipoprotein B-100	0	auto - discordant peptide type	0	18.38	SLHMYANR	iTRAQ8plex@N-term; iTRAQ8plex(Y)@5		-0.00612906	1598.88	400.726	1598.88	400.728	4	9	84.1.1.853.2	0	8.9974	5717	8.9831	1.62763	21.1313	0.79762	25.63	2.04456	24.1027	72.14	11.66	106.45	14.49	55.05	10.95	0
671.34	671.34	81.33	66.47	59.83	P04114	APOB	Apolipoprotein B-100	0	auto - discordant peptide type	0	42.47	SLHMYANR	iTRAQ8plex@N-term; Oxidation(M)@4		-0.00463307	1310.67	437.896	1310.67	437.898	3	9	78.1.1.876.3	0	5.7592	15061	5.6981	0.833954	22.0284	0.950852	20.763	0.878758	22.8958	143.19	20.05	108.26	18.41	130.26	19.97	0
671.34	671.34	81.33	66.47	59.83	P04114	APOB	Apolipoprotein B-100	0	auto - discordant peptide type	0	99	SLVTTLNSDLK	iTRAQ8plex@N-term; Dehydrated(D)@9; iTRAQ8plex(K)@11	cleaved Y-S@N-term	-0.000798053	1780.05	594.359	1780.06	594.359	3	14	73.1.1.1361.13	0	21.6365	15116	21.6518	0.982418	23.4269	0.754584	24.9294	1.30445	26.0203	189.95	29.83	169.18	29.41	137.13	26.55	0
671.34	671.34	81.33	66.47	59.83	P04114	APOB	Apolipoprotein B-100	0	auto - discordant peptide type	0	99	SLVTTLNSDLK	iTRAQ8plex@N-term; iTRAQ8plex(K)@11	cleaved Y-S@N-term	0.00102534	1798.07	600.363	1798.07	600.363	3	17	35.1.1.1395.7	0	27.9262	424058	28.2299	0.850727	4.57864	0.98768	4.29555	0.863008	4.71798	1090.87	31.95	841.35	29.61	1030.8	32.39	0
671.34	671.34	81.33	66.47	59.83	P04114	APOB	Apolipoprotein B-100	1	auto	0	99	SLWDFLK	iTRAQ8plex@N-term; iTRAQ8plex(K)@7		-0.00326532	1515.89	758.951	1515.89	758.953	2	12	53.1.1.1572.4	1	30.8227	64707	30.9233	0.868021	14.8417	1.01864	13.8718	0.853791	15.1683	205.11	19.6	161.41	18.33	199.89	20.1	0
671.34	671.34	81.33	66.47	59.83	P04114	APOB	Apolipoprotein B-100	0	auto - discordant peptide type	0	69.14	SNTVASLHTEK	iTRAQ8plex@N-term; Deamidated(N)@2; iTRAQ8plex(K)@11		-0.0260003	1794.97	449.749	1794.99	449.756	4	9	10.1.1.1131.3	0	10.7895	183463	10.6894	1.0937	5.07766	0.923504	5.25946	1.18658	5.36652	761.18	26.72	754.74	27.69	672.53	26.34	0
671.34	671.34	81.33	66.47	59.83	P04114	APOB	Apolipoprotein B-100	1	auto	0	99	SNTVASLHTEK	iTRAQ8plex@N-term; iTRAQ8plex(K)@11		-0.00150885	1794.01	599.01	1794.01	599.01	3	15	35.1.1.963.21	1	8.6794	73631	8.8668	1.38511	22.7055	1.61704	21.663	0.858234	20.7014	338.12	56.39	424.59	65.42	523.09	72.32	0
671.34	671.34	81.33	66.47	59.83	P04114	APOB	Apolipoprotein B-100	0	auto - discordant peptide type	0	49.88	SNTVASLHTEK	iTRAQ8plex@N-term; iTRAQ8plex(T)@3; iTRAQ8plex(K)@11		-0.00466439	2098.21	525.56	2098.22	525.561	4	11	56.1.1.768.12	0	7.735	4917	7.7502	1.01301	23.9396	0.483694	30.4116	2.09838	31.173	178.17	28.9	163.63	28.81	82.45	21.21	0
671.34	671.34	81.33	66.47	59.83	P04114	APOB	Apolipoprotein B-100	0	auto - discordant peptide type	0	76.02	SPAFTDLHLR	Carbamyl@N-term		0.00149672	1198.61	600.313	1198.61	600.312	2	11	51.1.1.1312.13	0	24.3651	36283	24.3837	1.60906	19.5167	0.655613	25.4076	2.45904	24.1438	42.44	6.32	61.91	7.81	26.62	5.48	0
671.34	671.34	81.33	66.47	59.83	P04114	APOB	Apolipoprotein B-100	1	auto	0	99	SPAFTDLHLR	iTRAQ8plex@N-term		0.000583128	1459.81	487.611	1459.81	487.61	3	15	61.1.1.885.5	1	15.5279	1804712	15.7841	0.847721	3.09896	0.912934	2.96914	0.930365	3.2514	2384.81	47.24	1832.82	43.68	2082.95	46.07	0
671.34	671.34	81.33	66.47	59.83	P04114	APOB	Apolipoprotein B-100	0	auto - discordant peptide type	0	94.53	SPAFTDLHLR	iTRAQ8plex@N-term; Acetyl(S)@1		0.0172062	1501.84	501.62	1501.82	501.614	3	13	68.1.1.1240.10	0	21.6619	63966	21.5458	0.375194	5.40231	0.394943	5.18027	0.951835	6.59038	1480.85	37.15	503.71	24.1	559.54	25.36	0
671.34	671.34	81.33	66.47	59.83	P04114	APOB	Apolipoprotein B-100	0	auto - discordant peptide type	0	99	SPAFTDLHLR	iTRAQ8plex@N-term; iTRAQ8plex(S)@1		-0.00158652	1764.01	442.01	1764.01	442.011	4	13	69.1.1.1036.5	0	12.6579	61205	12.6444	1.53058	4.15404	1.48741	4.14288	1.03102	3.85469	963.11	30.12	1336.43	36.54	1370.54	37.24	0
671.34	671.34	81.33	66.47	59.83	P04114	APOB	Apolipoprotein B-100	0	auto - discordant peptide type	0	99	SPAFTDLHLR	iTRAQ8plex@N-term; Methyl(S)@1		-0.00239127	1473.82	492.281	1473.82	492.282	3	14	65.1.1.943.9	0	13.5285	13504	13.5095	5.11914	35.5067	4.51767	35.8955	1.13533	21.6991	93.59	30.17	434.35	64.65	404.51	63.87	0
671.34	671.34	81.33	66.47	59.83	P04114	APOB	Apolipoprotein B-100	1	auto	0	99	SPSQADINK	iTRAQ8plex@N-term; iTRAQ8plex(K)@9		-0.00357021	1566.88	523.3	1566.88	523.302	3	11	28.1.1.917.10	1	6.179	21570	6.2009	0.573143	23.8112	1.59062	17.0477	0.361025	22.6803	272.07	35.64	141.37	28.11	414.03	45.17	0
671.34	671.34	81.33	66.47	59.83	P04114	APOB	Apolipoprotein B-100	0	auto - discordant peptide type	0	93.97	SPSQADINK	iTRAQ8plex@N-term; iTRAQ8plex(S)@3; iTRAQ8plex(K)@9		-0.00221415	1871.09	468.779	1871.09	468.779	4	12	51.1.1.911.12	0	6.5885	63436	6.6088	1.14422	3.67913	1.0681	3.70766	1.07334	3.74512	1416.16	36.46	1469.05	38.61	1447.14	38.61	0
671.34	671.34	81.33	66.47	59.83	P04114	APOB	Apolipoprotein B-100	0	auto - discordant peptide type	0.000434512	64.69	SQADINK	iTRAQ8plex@N-term; iTRAQ8plex(K)@7	cleaved P-S@N-term	-0.0134959	1382.78	461.935	1382.8	461.94	3	10	30.1.1.905.6	0	5.8636	24632	5.9376	0.992781	20.8131	0.688137	23.0912	1.4455	23.9653	478.04	66.93	430.26	66.26	314.72	57.79	0
671.34	671.34	81.33	66.47	59.83	P04114	APOB	Apolipoprotein B-100	1	auto	0	99	SQAIATK	iTRAQ8plex@N-term; iTRAQ8plex(K)@7		-0.00296514	1325.81	442.944	1325.81	442.945	3	10	61.1.1.688.7	1	6.731	86353	6.666	0.787091	4.00638	0.893627	3.76168	0.882489	4.20969	1498.81	37.44	1069.51	33.5	1281.41	36.04	0
671.34	671.34	81.33	66.47	59.83	P04114	APOB	Apolipoprotein B-100	1	auto	0.0070049	62.18	SQAIATKK	iTRAQ8plex@N-term; iTRAQ8plex(K)@7; iTRAQ8plex(K)@8	missed K-K@7	-0.00374379	1758.11	440.535	1758.11	440.536	4	9	66.1.1.890.11	1	10.2743	19296	10.2517	0.603328	4.84592	0.796546	4.25991	0.758898	5.1544	1240.04	34.03	678.27	27.09	945	30.79	0
671.34	671.34	81.33	66.47	59.83	P04114	APOB	Apolipoprotein B-100	1	auto	0	99	SSVKLQGTSK	iTRAQ8plex@N-term; iTRAQ8plex(K)@4; iTRAQ8plex(K)@10	missed K-L@4	-0.0097286	1946.18	487.553	1946.19	487.555	4	11	63.1.1.918.13	1	6.7015	23969	6.7201	1.00692	17.1838	1.00009	16.8918	1.00878	17.6624	697.76	80.87	636.96	80.81	667.62	82.04	0
671.34	671.34	81.33	66.47	59.83	P04114	APOB	Apolipoprotein B-100	0	auto - discordant peptide type	0.00788851	85.23	SSWLQK	iTRAQ8plex@N-term; iTRAQ8plex(K)@6	cleaved M-S@N-term	-0.00441599	1355.8	678.906	1355.8	678.908	2	10	65.1.1.929.20	0	12.9235	33621	12.885	0.691892	24.9578	1.16901	20.6836	0.593009	24.711	424.78	63.01	266.45	53.48	475.08	68.48	0
671.34	671.34	81.33	66.47	59.83	P04114	APOB	Apolipoprotein B-100	0	auto - discordant peptide type	0	99	STLISSSQSCQYTLDAK	iTRAQ8plex@N-term; Methylthio(C)@10; Deamidated(Q)@11; iTRAQ8plex(K)@17	cleaved L-S@N-term	0.0372681	2486.29	622.579	2486.25	622.57	4	13	33.1.1.1327.3	0	19.528	10774	19.6037	0.995981	28.3607	1.1576	26.6533	0.862047	28.0831	129.11	24.6	116.58	24.49	142.99	26.65	0
671.34	671.34	81.33	66.47	59.83	P04114	APOB	Apolipoprotein B-100	0	auto - discordant peptide type	0	51.46	STLISSSQSCQYTLDAK	iTRAQ8plex@N-term; Methylthio(C)@10; iTRAQ8plex(K)@17	cleaved L-S@N-term	0.0201469	2485.29	622.329	2485.27	622.324	4	10	32.1.1.1335.2	0	19.5393	6862	19.5262	1.23957	24.8551	1.47546	23.4957	0.841747	23.2379	59.62	10.58	67	11.66	84.16	12.96	0
671.34	671.34	81.33	66.47	59.83	P04114	APOB	Apolipoprotein B-100	1	auto	0.00305075	42.27	STSPPK	iTRAQ8plex@N-term; iTRAQ8plex(K)@6		-0.00176527	1223.73	408.918	1223.73	408.918	3	6	60.1.1.1065.2	1	7.3564	8901	7.0868	1.7651	31.3535	1.577	31.7911	1.12145	28.4035	79.47	19.36	127.17	25.1	119.9	24.49	0
671.34	671.34	81.33	66.47	59.83	P04114	APOB	Apolipoprotein B-100	1	auto	0	99	SVGFHLPSR	iTRAQ8plex@N-term		-0.000722484	1302.73	435.252	1302.74	435.252	3	13	83.1.1.975.5	1	12.4842	239756	12.4719	0.675022	2.51512	0.732408	2.37926	0.923432	2.75035	4226	62.84	2586.19	52.46	2961.2	55	0
671.34	671.34	81.33	66.47	59.83	P04114	APOB	Apolipoprotein B-100	0	auto - discordant peptide type	0	44.32	SVMAPF	iTRAQ8plex@N-term	cleaved F-T@C-term	-0.00266355	954.512	478.264	954.515	478.265	2	8	72.1.1.1348.8	0	26.2384	156371	26.2653	0.95126	3.99069	0.573488	4.64118	1.66194	4.83732	1332.19	35.33	1148.89	34.26	730.93	27.84	0
671.34	671.34	81.33	66.47	59.83	P04114	APOB	Apolipoprotein B-100	0	auto - discordant peptide type	0	37.84	SVMAPF	iTRAQ8plex@N-term; Oxidation(M)@3	cleaved F-T@C-term	-0.00202267	970.508	486.261	970.51	486.262	2	9	71.1.1.1134.8	0	16.8662	226284	16.7597	1.32601	4.14911	1.05061	4.37077	1.26458	4.25204	1030.85	31.13	1239.24	35.26	1036.15	32.74	0
671.34	671.34	81.33	66.47	59.83	P04114	APOB	Apolipoprotein B-100	1	auto	0	99	SVMAPFTMTIDAHTNGNGK	iTRAQ8plex@N-term; iTRAQ8plex(K)@19		-0.0136364	2599.32	650.838	2599.33	650.841	4	18	56.1.1.1229.14	1	28.1199	80334	28.1814	1.51166	6.29734	1.99176	5.88768	0.760426	5.45608	422.69	19.95	579.28	24.15	805.46	28.35	0
671.34	671.34	81.33	66.47	59.83	P04114	APOB	Apolipoprotein B-100	0	auto - discordant peptide type	0	99	SVSATYELQR	iTRAQ8plex@N-term	cleaved Y-S@N-term	0.004503	1456.79	486.603	1456.78	486.602	3	13	45.1.1.1019.12	0	11.0755	39770	11.0958	0.872034	22.1697	1.02938	20.7276	0.848782	22.6397	458.27	65.5	362.3	61.4	451.32	67.75	0
671.34	671.34	81.33	66.47	59.83	P04114	APOB	Apolipoprotein B-100	0	auto - discordant peptide type	0	99	SVSDGIAALDLNAVANK	iTRAQ8plex@N-term; Dehydrated(D)@10; iTRAQ8plex(K)@17		-0.00228566	2247.27	750.096	2247.27	750.097	3	18	47.1.1.1429.17	0	42.5435	19753	42.4648	0.629079	30.6426	1.42312	23.3294	0.442897	29.4718	152.02	26.65	86.7	21.79	206.98	31.86	0
671.34	671.34	81.33	66.47	59.83	P04114	APOB	Apolipoprotein B-100	0	auto - discordant peptide type	0	99	SVSDGIAALDLNAVANK	iTRAQ8plex@N-term; Dehydrated(D)@4; iTRAQ8plex(K)@17		0.00197353	2247.27	562.825	2247.27	562.824	4	15	40.1.1.1389.8	0	22.6441	81175	22.6266	0.68166	5.1807	0.854457	4.67756	0.799315	5.4642	990.89	30.43	612.36	25.55	810.03	28.58	0
671.34	671.34	81.33	66.47	59.83	P04114	APOB	Apolipoprotein B-100	0	auto - discordant peptide type	0	99	SVSDGIAALDLNAVANK	iTRAQ8plex@N-term; Dehydrated(S)@3; iTRAQ8plex(K)@17		0.00134355	2247.27	562.825	2247.27	562.824	4	14	41.1.1.1398.7	0	22.9325	89941	22.9611	1.05246	4.83043	0.906699	4.98282	1.163	5.13273	859.58	28.39	820.17	28.91	745.65	27.82	0
671.34	671.34	81.33	66.47	59.83	P04114	APOB	Apolipoprotein B-100	0	auto - discordant peptide type	0	99	SVSDGIAALDLNAVANK	iTRAQ8plex@N-term; iTRAQ8plex(S)@1; iTRAQ8plex(K)@17		0.000777535	2569.49	514.904	2569.48	514.904	5	12	28.1.1.1462.7	0	30.3825	19646	30.5441	1.18065	25.7695	0.867545	27.8598	1.36355	27.8836	283.35	51.58	303.29	55.32	235.18	49.6	0
671.34	671.34	81.33	66.47	59.83	P04114	APOB	Apolipoprotein B-100	0	auto - discordant peptide type	0	99	SVSDGIAALDLNAVANK	iTRAQ8plex@N-term; iTRAQ8plex(S)@3; Deamidated(N)@12; iTRAQ8plex(K)@17		0.0289908	2570.5	643.632	2570.47	643.624	4	12	28.1.1.1471.5	0	30.7934	16434	30.6749	0.909572	16.2307	0.558108	18.9506	1.6329	19.9042	165.52	17.61	136.49	16.73	88.38	13.86	0
671.34	671.34	81.33	66.47	59.83	P04114	APOB	Apolipoprotein B-100	0	auto - discordant peptide type	0	99	SVSDGIAALDLNAVANK	iTRAQ8plex@N-term; iTRAQ8plex(S)@3; iTRAQ8plex(K)@17		0.000278092	2569.48	643.378	2569.48	643.378	4	16	30.1.1.1460.7	0	30.5379	24492	30.5482	0.798689	13.1043	0.847712	12.5891	0.943995	13.9725	415.82	34.16	301.09	30.74	337.24	32.17	0
671.34	671.34	81.33	66.47	59.83	P04114	APOB	Apolipoprotein B-100	0	auto - discordant peptide type	0	53.85	SVSLPSLDPASAK	iTRAQ8plex@N-term; Acetyl(S)@3; iTRAQ8plex(K)@13		0.00109448	1921.1	481.282	1921.1	481.282	4	12	44.1.1.1321.6	0	24.4748	16497	24.4608	0.687415	29.3869	0.825554	26.8589	0.834284	31.2124	306.03	53.48	190.72	45.06	241.71	49.3	0
671.34	671.34	81.33	66.47	59.83	P04114	APOB	Apolipoprotein B-100	1	auto	0	99	SVSLPSLDPASAK	iTRAQ8plex@N-term; iTRAQ8plex(K)@13		-0.0016558	1879.09	627.369	1879.09	627.37	3	13	37.1.1.1259.14	1	16.4358	263451	16.1908	1.70598	23.4264	3.53929	20.5358	0.482945	17.9856	291.55	52.44	450.92	67.68	987.22	97.83	0
671.34	671.34	81.33	66.47	59.83	P04114	APOB	Apolipoprotein B-100	0	auto - discordant peptide type	0	98.1	TEHGSEMLFFGNAIEGK	iTRAQ8plex@N-term; iTRAQ8plex(S)@5; iTRAQ8plex(K)@17		-0.00195101	2778.48	556.702	2778.48	556.703	5	12	10.1.1.1274.7	0	17.1834	50102	17.212	1.00425	5.16921	1.13139	4.90498	0.889343	5.15157	773.53	26.93	704.26	26.91	837.29	28.93	0
671.34	671.34	81.33	66.47	59.83	P04114	APOB	Apolipoprotein B-100	0	auto - discordant peptide type	0.000434512	72.34	TFQIPGY	iTRAQ8plex@N-term	cleaved Y-T@C-term	-0.000995112	1128.61	565.313	1128.61	565.313	2	9	62.1.1.1484.7	0	32.1813	104211	32.2565	1.03366	6.36787	0.950002	6.43254	1.09017	6.66587	500.26	21.66	468.8	21.89	454.68	21.63	0
671.34	671.34	81.33	66.47	59.83	P04114	APOB	Apolipoprotein B-100	0	auto - discordant peptide type	0.0168249	98.7	TGISPLAL	iTRAQ8plex@N-term	cleaved L-I@C-term	-0.00224424	1074.66	538.336	1074.66	538.337	2	11	71.1.1.1522.11	0	33.9833	24346	34.0966	1.35614	12.7758	0.920201	14.1983	1.4766	13.775	107.42	10.05	132.07	11.49	94.57	10.1	0
671.34	671.34	81.33	66.47	59.83	P04114	APOB	Apolipoprotein B-100	0	auto - discordant peptide type	2	99	TGISPLALIK	Carbamyl@N-term; iTRAQ8plex(K)@10		-0.00056184	1358.84	680.429	1358.84	680.429	2	14	70.1.1.1886.8	0	50.1965	11992	50.2887	1.86814	31.3784	1.70339	31.7714	1.09884	27.8761	46.58	11.49	78.89	15.3	75.91	15.2	0
671.34	671.34	81.33	66.47	59.83	P04114	APOB	Apolipoprotein B-100	0	auto - discordant peptide type	0	34.03	TGISPLALIK	iTRAQ8plex@N-term; Acetyl(S)@4; iTRAQ8plex(K)@10		-0.00187522	1662.05	555.025	1662.05	555.025	3	11	82.1.1.1686.15	0	40.8968	10152	40.7752	0.824285	26.7758	1.02571	24.432	0.805182	27.1964	325.95	55.23	243.58	50.5	319.86	56.3	0
671.34	671.34	81.33	66.47	59.83	P04114	APOB	Apolipoprotein B-100	1	auto	0	99	TGISPLALIK	iTRAQ8plex@N-term; iTRAQ8plex(K)@10		-3.79717e-05	1620.04	541.022	1620.04	541.022	3	14	79.1.1.1601.7	1	37.5268	631268	37.9058	0.799841	25.4802	1.51807	20.9036	0.5279	24.0903	369.85	58.82	268.19	53.39	537.16	72.87	0
671.34	671.34	81.33	66.47	59.83	P04114	APOB	Apolipoprotein B-100	0	auto - discordant peptide type	0	33.64	TGISPLALIK	iTRAQ8plex@N-term; Oxidation(P)@5; iTRAQ8plex(K)@10		-0.0235655	1636.01	546.346	1636.04	546.353	3	9	63.1.1.1936.8	0	52.3623	29974	52.3892	0.734582	7.61475	0.785492	7.29291	0.936998	8.25265	434.24	20.15	289.19	17.46	326.33	18.36	0
671.34	671.34	81.33	66.47	59.83	P04114	APOB	Apolipoprotein B-100	0	auto - discordant peptide type	0	90.57	TGISPLALIK	No iTRAQ8plex@N-term; iTRAQ8plex(K)@10		0.000827916	1315.84	439.62	1315.84	439.62	3	11	83.1.1.1440.4	0	32.9626	174025	32.6447	0.865249	6.64109	0.931027	6.34102	0.931149	6.91369	512.78	21.91	402.24	20.45	456.75	21.4	0
671.34	671.34	81.33	66.47	59.83	P04114	APOB	Apolipoprotein B-100	1	auto	0.0218195	83.66	TGLKEFLK	iTRAQ8plex@N-term; iTRAQ8plex(K)@4; iTRAQ8plex(K)@8		-0.00824702	1847.16	462.796	1847.16	462.798	4	9	63.1.1.1190.6	1	18.8143	11493	18.8002	0.967856	27.3017	0.926681	27.1756	1.04645	28.6582	282.83	51.48	248.17	50.5	250.75	50.6	0
671.34	671.34	81.33	66.47	59.83	P04114	APOB	Apolipoprotein B-100	0	auto - discordant peptide type	0	99	TIEGPLTSFGLSNK	iTRAQ8plex@N-term; iTRAQ8plex(K)@14	cleaved F-T@N-term	-0.0018285	2071.18	691.399	2071.18	691.4	3	15	50.1.1.1594.13	0	36.9967	34306	36.6133	1.5396	30.3156	1.62223	29.6867	0.950899	27.501	90.25	20.62	125.97	25.1	140.07	26.55	0
671.34	671.34	81.33	66.47	59.83	P04114	APOB	Apolipoprotein B-100	0	auto - discordant peptide type	0	99	TIEMSAFGYVFPK	iTRAQ8plex@N-term; iTRAQ8plex(K)@13	cleaved F-T@N-term	-0.00166741	2097.14	700.054	2097.14	700.055	3	17	60.1.1.1587.20	0	30.695	178294	30.6096	0.903003	4.01796	0.923705	3.9176	0.979481	4.21295	1362.67	35.72	1115.56	33.97	1204.23	35.06	0
671.34	671.34	81.33	66.47	59.83	P04114	APOB	Apolipoprotein B-100	0	auto - discordant peptide type	0	93.81	TIEMSAFGYVFPK	iTRAQ8plex@N-term; iTRAQ8plex(Y)@9; iTRAQ8plex(K)@13	cleaved F-T@N-term	-0.00243707	2401.35	601.344	2401.35	601.344	4	12	69.1.1.1676.12	0	41.2603	21919	41.1474	0.815309	27.2335	1.03783	24.7762	0.787113	27.6761	317.43	54.5	234.63	49.6	315.18	56.3	0
671.34	671.34	81.33	66.47	59.83	P04114	APOB	Apolipoprotein B-100	0	auto - discordant peptide type	2	99	TIEMSAFGYVFPK	iTRAQ8plex@N-term; Oxidation(M)@4; iTRAQ8plex(K)@13	cleaved F-T@N-term	0.00772121	2113.15	705.389	2113.14	705.387	3	15	53.1.1.1438.18	0	24.8973	22134	24.8624	1.18899	31.0506	1.18884	30.6494	1.00206	30.6617	194.92	42.78	210.11	46.15	221.7	47.43	0
671.34	671.34	81.33	66.47	59.83	P04114	APOB	Apolipoprotein B-100	0	auto - discordant peptide type	0	72.42	TIEVPTFGK	iTRAQ8plex@N-term; iTRAQ8plex(K)@9	cleaved H-T@N-term	-0.00133258	1598.95	533.99	1598.95	533.99	3	10	49.1.1.838.10	0	22.413	78753	22.5712	2.22051	6.24836	1.69248	6.56309	1.31452	5.52562	367.23	18.65	739.27	26.91	594.63	24.72	0
671.34	671.34	81.33	66.47	59.83	P04114	APOB	Apolipoprotein B-100	0	auto - discordant peptide type	0	99	TIHDLHLFIENIDFNK	iTRAQ8plex@N-term; Dehydrated(D)@13; iTRAQ8plex(K)@16		0.00182019	2558.41	512.69	2558.41	512.689	5	13	27.1.1.2079.2	0	58.1984	5957	58.1831	0.77254	23.0455	1.07047	20.3775	0.723079	23.233	91.95	13.11	64.4	11.66	94.17	13.71	0
671.34	671.34	81.33	66.47	59.83	P04114	APOB	Apolipoprotein B-100	0	auto - discordant peptide type	0	68.02	TIHDLHLFIENIDFNK	iTRAQ8plex@N-term; Dehydrated(D)@4; iTRAQ8plex(K)@16		0.000992743	2558.41	512.69	2558.41	512.689	5	12	16.1.1.1889.3	0	49.5435	7857	49.5296	0.847403	29.2802	0.854269	28.6224	0.993885	31.2366	80.13	15	61.56	13.86	65.49	14.18	0
671.34	671.34	81.33	66.47	59.83	P04114	APOB	Apolipoprotein B-100	1	auto	0	99	TIHDLHLFIENIDFNK	iTRAQ8plex@N-term; iTRAQ8plex(K)@16		0.00156552	2576.42	645.113	2576.42	645.113	4	11	1.1.1.1530.6	1	28.439	504974	28.2405	0.850422	24.1968	1.25166	21.2353	0.680751	23.6444	392.12	60.58	302.32	56.3	469.56	68.41	0
671.34	671.34	81.33	66.47	59.83	P04114	APOB	Apolipoprotein B-100	0	auto - discordant peptide type	0.00217692	93.82	TIITTPPLK	iTRAQ8plex@N-term; iTRAQ8plex(K)@9	cleaved Y-T@N-term	-0.0089687	1591.01	531.343	1591.02	531.346	3	11	71.1.1.1136.17	0	16.9714	58476	16.8038	0.841462	17.2248	0.707728	17.9177	1.19127	19.385	773.61	85.09	590.16	78.23	523.81	74.09	0
671.34	671.34	81.33	66.47	59.83	P04114	APOB	Apolipoprotein B-100	0	auto - discordant peptide type	0	25.44	TIITTPPLKDFSLWEK	iTRAQ8plex@N-term; iTRAQ8plex(K)@9; iTRAQ8plex(K)@16	cleaved Y-T@N-term	-0.00271591	2800.65	701.169	2800.65	701.17	4	9	30.1.1.1935.4	0	51.85	4889	52.1269	1.38311	17.9037	1.05025	19.0207	1.31949	18.3203	54.23	7.14	68	8.25	54.49	7.48	0
671.34	671.34	81.33	66.47	59.83	P04114	APOB	Apolipoprotein B-100	0	auto - discordant peptide type	0	99	TILGTMPAFEVSLQALQK	iTRAQ8plex@N-term; Deamidated(Q)@14; iTRAQ8plex(K)@18		-0.00387534	2555.45	852.822	2555.45	852.824	3	20	3.1.1.2033.9	0	40.9085	22175	40.9717	0.751207	24.5142	0.824379	23.2741	0.913005	26.2616	206.39	31.06	140.56	27.2	162.78	28.9	0
671.34	671.34	81.33	66.47	59.83	P04114	APOB	Apolipoprotein B-100	0	auto - discordant peptide type	0	99	TILGTMPAFEVSLQALQK	iTRAQ8plex@N-term; Deamidated(Q)@17; iTRAQ8plex(K)@18		-0.00477881	2555.44	852.822	2555.45	852.824	3	21	2.1.1.1812.6	0	41.0848	20358	41.1001	0.53265	20.4265	0.641851	18.3661	0.831473	22.6151	230.38	25.4	111.25	19.13	141.47	20.78	0
671.34	671.34	81.33	66.47	59.83	P04114	APOB	Apolipoprotein B-100	1	auto	0	99	TILGTMPAFEVSLQALQK	iTRAQ8plex@N-term; iTRAQ8plex(K)@18		0.00115049	2554.47	639.624	2554.47	639.624	4	15	56.1.1.2091.15	1	66.7026	85586	66.4025	1.004	30.0985	1.2148	28.024	0.828073	29.5011	228.33	46.26	207.83	46.26	265.37	51.38	0
671.34	671.34	81.33	66.47	59.83	P04114	APOB	Apolipoprotein B-100	1	auto	0.00130484	21.17	TIPEMR	iTRAQ8plex@N-term	cleaved L-T@N-term	-0.0041382	1049.58	525.798	1049.58	525.8	2	7	49.1.1.571.13	1	10.6354	23415	10.6078	1.3269	23.7062	0.709615	28.4694	1.87351	27.8453	314.89	54.41	378.8	61.48	213.78	48.37	0
671.34	671.34	81.33	66.47	59.83	P04114	APOB	Apolipoprotein B-100	1	auto	0.034328	89.13	TIVAFVK	iTRAQ8plex@N-term; iTRAQ8plex(K)@7	cleaved F-T@N-term	-0.00301546	1384.89	462.636	1384.89	462.637	3	11	79.1.1.1254.8	1	22.0192	66194	22.0018	0.878076	4.16711	1.07906	3.84151	0.815319	4.19895	1292.48	34.79	1028.89	32.73	1334.3	36.57	0
671.34	671.34	81.33	66.47	59.83	P04114	APOB	Apolipoprotein B-100	0	auto - discordant peptide type	2	99	TKNSEEFAAAMSR	iTRAQ8plex@N-term; iTRAQ8plex(K)@2	missed K-N@2	-0.996195	2048.08	513.028	2049.08	513.277	4	13	30.1.1.1036.8	0	11.6645	11699	11.5992	1.14655	26.5643	0.762089	29.7634	1.5074	29.9671	135.33	25.2	140.67	26.65	98.67	22.91	0
671.34	671.34	81.33	66.47	59.83	P04114	APOB	Apolipoprotein B-100	0	auto - discordant peptide type	2	99	TLADLTLLDSPIK	iTRAQ8plex@N-term; Dehydrated(D)@9; iTRAQ8plex(K)@13		-0.000746043	1989.2	664.073	1989.2	664.073	3	18	59.1.1.1618.7	0	32.3154	44225	32.2499	1.14798	16.7225	1.03582	16.9624	1.11043	17.1178	342.04	40.06	355.98	42.49	338.96	41.59	0
671.34	671.34	81.33	66.47	59.83	P04114	APOB	Apolipoprotein B-100	0	auto - discordant peptide type	0	99	TLADLTLLDSPIK	iTRAQ8plex@N-term; Dehydrated(S)@10; iTRAQ8plex(K)@13		-0.000531505	1989.2	664.073	1989.2	664.073	3	15	60.1.1.1619.10	0	32.1515	34885	32.2188	1.01347	7.95307	1.28799	7.32109	0.788386	7.69835	325.39	17.46	298.97	17.55	400.96	19.97	0
671.34	671.34	81.33	66.47	59.83	P04114	APOB	Apolipoprotein B-100	0	auto - discordant peptide type	0	99	TLADLTLLDSPIK	iTRAQ8plex@N-term; Dehydrated(T)@6; iTRAQ8plex(K)@13		-0.000746043	1989.2	664.073	1989.2	664.073	3	16	59.1.1.1622.7	0	32.4933	44225	32.2499	0.628593	28.6371	0.894427	24.7174	0.704149	29.8203	172.37	28.37	98.23	23.02	147.5	27.2	0
671.34	671.34	81.33	66.47	59.83	P04114	APOB	Apolipoprotein B-100	0	auto - discordant peptide type	0	60.49	TLELSNGV	iTRAQ8plex@N-term; Deamidated(N)@6	cleaved N-T@N-term; cleaved V-I@C-term	0.00960056	1136.63	569.324	1136.62	569.319	2	11	43.1.1.1126.17	0	15.8619	35773	15.8299	1.72059	7.35009	0.958071	8.50048	1.79937	7.84754	291.51	16.58	454.72	21.17	267.2	16.88	0
671.34	671.34	81.33	66.47	59.83	P04114	APOB	Apolipoprotein B-100	0	auto - shared MS/MS	0.000869459	16.2	TLLK	iTRAQ8plex@N-term; iTRAQ8plex(K)@4		-0.00414077	1081.73	541.871	1081.73	541.873	2	6	74.1.1.1347.12	0	11.698	293909	11.542	0.72319	28.8522	0.79668	27.1634	0.909513	30.9696	305.93	53.48	200.58	46.04	233.18	48.48	0
671.34	671.34	81.33	66.47	59.83	P04114	APOB	Apolipoprotein B-100	0	auto - shared MS/MS	0.0227338	84.26	TLQELK	iTRAQ8plex@N-term; iTRAQ8plex(K)@6		-0.00264986	1338.83	447.284	1338.83	447.285	3	10	42.1.1.1144.3	0	11.7076	1340277	11.7429	0.872471	1.14212	0.76415	1.16853	1.14396	1.25759	17203.7	126.91	13607.8	118.65	12577.3	113.98	0
671.34	671.34	81.33	66.47	59.83	P04114	APOB	Apolipoprotein B-100	0	auto - shared MS/MS	0.159267	97.77	TLQELKK	iTRAQ8plex@N-term; iTRAQ8plex(K)@6; iTRAQ8plex(K)@7	missed K-K@6	-0.0134803	1771.12	886.567	1771.13	886.574	2	11	58.1.1.1144.21	0	11.0935	19680	11.0987	1.49134	6.08237	1.1546	6.4385	1.29415	6.07912	453.58	20.66	613.26	24.72	501.04	22.8	0
671.34	671.34	81.33	66.47	59.83	P04114	APOB	Apolipoprotein B-100	1	auto	0	99	TLQGIPQMIGEVIR	iTRAQ8plex@N-term		0.00223958	1858.07	620.363	1858.07	620.362	3	17	57.1.1.1905.15	1	61.07	646951	60.7774	0.814148	4.36331	1.04012	3.96183	0.784261	4.42884	1237.66	34.03	913.52	30.95	1231.6	35.13	0
671.34	671.34	81.33	66.47	59.83	P04114	APOB	Apolipoprotein B-100	0	auto - discordant peptide type	0	99	TLQGIPQMIGEVIR	iTRAQ8plex@N-term; Deamidated(Q)@3		0.000819919	1859.05	620.691	1859.05	620.69	3	16	2.1.1.1771.7	0	39.2402	53853	39.2688	0.761263	24.0908	0.792888	23.1705	0.961973	25.9904	423.44	62.93	292.24	55.41	321.21	57.1	0
671.34	671.34	81.33	66.47	59.83	P04114	APOB	Apolipoprotein B-100	0	auto - discordant peptide type	0	99	TLQGIPQMIGEVIR	iTRAQ8plex@N-term; Deamidated(Q)@3; Deamidated(Q)@7		0.0382067	1860.07	621.031	1860.03	621.018	3	15	56.1.1.1958.10	0	60.7877	43623	60.9436	1.21649	4.70805	0.93144	5.02221	1.30856	4.99175	835.94	28.02	921.93	30.48	744.93	27.86	0
671.34	671.34	81.33	66.47	59.83	P04114	APOB	Apolipoprotein B-100	0	auto - discordant peptide type	0	99	TLQGIPQMIGEVIR	iTRAQ8plex@N-term; Deamidated(Q)@7		0.000819919	1859.05	620.691	1859.05	620.69	3	14	2.1.1.1768.5	0	39.1025	71956	39.1798	1.04451	26.3	1.6098	23.2208	0.650102	24.3219	293.3	52.44	277.74	53.57	451.72	66.93	0
671.34	671.34	81.33	66.47	59.83	P04114	APOB	Apolipoprotein B-100	0	auto - discordant peptide type	0	99	TLQGIPQMIGEVIR	iTRAQ8plex@N-term; Methyl(T)@1		0.00612664	1872.09	625.036	1872.08	625.034	3	14	57.1.1.1882.2	0	60.0557	17137	59.9908	4.60375	23.4858	3.25998	24.4176	1.41494	16.0274	21.7	4.58	90.57	9.33	67.68	8.31	0
671.34	671.34	81.33	66.47	59.83	P04114	APOB	Apolipoprotein B-100	0	auto - discordant peptide type	0	99	TLQGIPQMIGEVIR	iTRAQ8plex@N-term; Oxidation(M)@8		0.00128795	1874.06	625.694	1874.06	625.694	3	14	55.1.1.1676.12	0	40.6422	97080	40.8917	0.746189	9.22246	1.31029	7.64715	0.570587	8.95547	295.17	16.61	199.68	14.59	370.02	19.16	0
671.34	671.34	81.33	66.47	59.83	P04114	APOB	Apolipoprotein B-100	0	auto - discordant peptide type	0	92.74	TMTIDAH	iTRAQ8plex@N-term	cleaved F-T@N-term; cleaved H-T@C-term	0.00557619	1091.56	546.789	1091.56	546.787	2	10	22.1.1.994.15	0	9.5829	47853	9.6418	2.94611	26.3126	3.75575	25.3622	0.785945	18.3273	190.81	42.66	509.64	70.71	685.62	82.1	0
671.34	671.34	81.33	66.47	59.83	P04114	APOB	Apolipoprotein B-100	0	auto - discordant peptide type	0	99	TMTIDAHTNGNGK	iTRAQ8plex@N-term; Deamidated(N)@11; iTRAQ8plex(K)@13	cleaved F-T@N-term	0.00205013	1968.02	493.013	1968.02	493.012	4	14	13.1.1.1115.6	0	10.5543	269503	10.5846	1.1378	2.81389	0.920308	2.95113	1.23872	2.98131	2425.41	47.71	2501.87	50.34	2135.52	46.98	0
671.34	671.34	81.33	66.47	59.83	P04114	APOB	Apolipoprotein B-100	0	auto - discordant peptide type	0	99	TMTIDAHTNGNGK	iTRAQ8plex@N-term; Deamidated(N)@9; iTRAQ8plex(K)@13	cleaved F-T@N-term	0.00202237	1968.02	493.013	1968.02	493.012	4	12	15.1.1.1124.6	0	10.6904	189766	10.5847	1.13886	5.76844	0.839456	6.21529	1.3593	6.27283	576.51	23.26	595.24	24.54	463.01	21.89	0
671.34	671.34	81.33	66.47	59.83	P04114	APOB	Apolipoprotein B-100	0	auto - discordant peptide type	0	99	TMTIDAHTNGNGK	iTRAQ8plex@N-term; iTRAQ8plex(K)@13	cleaved F-T@N-term	-0.00138565	1967.03	492.766	1967.04	492.766	4	16	50.1.1.953.10	0	8.6122	106045	8.7272	1.46778	4.18808	1.30538	4.27045	1.12659	4.03338	964.72	30.13	1283.74	35.82	1204.82	35.09	0
671.34	671.34	81.33	66.47	59.83	P04114	APOB	Apolipoprotein B-100	0	auto - discordant peptide type	0	99	TMTIDAHTNGNGK	iTRAQ8plex@N-term; Oxidation(M)@2; Deamidated(N)@11; iTRAQ8plex(K)@13	cleaved F-T@N-term	-0.00127201	1984.01	497.011	1984.01	497.011	4	11	14.1.1.1108.11	0	10.0341	30053	10.012	1.16836	5.89975	0.853765	6.36916	1.37113	6.38991	543.33	22.58	575.51	24.1	443.8	21.42	0
671.34	671.34	81.33	66.47	59.83	P04114	APOB	Apolipoprotein B-100	0	auto - discordant peptide type	0	99	TMTIDAHTNGNGK	iTRAQ8plex@N-term; Oxidation(M)@2; Deamidated(N)@9; iTRAQ8plex(K)@13	cleaved F-T@N-term	-0.00246459	1984.01	497.01	1984.01	497.011	4	14	15.1.1.1108.12	0	9.9814	29519	9.9577	0.951264	6.37536	0.572288	7.43392	1.66543	7.74764	521.99	22.11	450.17	21.45	285.8	17.46	0
671.34	671.34	81.33	66.47	59.83	P04114	APOB	Apolipoprotein B-100	0	auto - discordant peptide type	0	99	TMTIDAHTNGNGK	iTRAQ8plex@N-term; Oxidation(M)@2; iTRAQ8plex(K)@13	cleaved F-T@N-term	-0.00214396	1983.03	496.764	1983.03	496.765	4	12	44.1.1.897.10	0	5.7198	18504	5.6845	0.895087	16.4753	0.802544	16.7176	1.11747	17.91	406.91	43.65	330.2	41.29	312.43	40.06	0
671.34	671.34	81.33	66.47	59.83	P04114	APOB	Apolipoprotein B-100	0	auto - discordant peptide type	0	99	TNFFHESGLEAHVALK	iTRAQ8plex@N-term; iTRAQ8plex(K)@16	cleaved N-T@N-term	0.000857854	2407.31	602.835	2407.31	602.835	4	15	24.1.1.1384.12	0	26.9697	29567	26.8075	0.496936	10.9367	0.667951	9.41559	0.745412	11.9402	284.05	16.28	127.97	11.92	181.52	13.56	0
671.34	671.34	81.33	66.47	59.83	P04114	APOB	Apolipoprotein B-100	0	auto - discordant peptide type	0.000434512	58.18	TPALHF	iTRAQ8plex@N-term	cleaved F-K@C-term	-0.002174	988.563	495.289	988.565	495.29	2	10	76.1.1.1151.8	0	17.4332	58230	17.4602	0.563397	8.36749	0.721221	7.39273	0.782683	9.05934	438.14	20.22	223.79	15.62	302.32	17.46	0
671.34	671.34	81.33	66.47	59.83	P04114	APOB	Apolipoprotein B-100	1	auto	2	99	TPALHFK	iTRAQ8plex@N-term; iTRAQ8plex(K)@7		-0.00257065	1420.86	474.628	1420.87	474.629	3	12	76.1.1.1022.5	1	11.69	798377	11.5033	0.913153	4.27149	1.00026	4.03955	0.914686	4.38509	3324.18	55.8	2855.02	54.26	3180.81	56.72	1309
671.34	671.34	81.33	66.47	59.83	P04114	APOB	Apolipoprotein B-100	0	auto - discordant peptide type	0	40.89	TSQCTLK	iTRAQ8plex@N-term; Deamidated(Q)@3; Methylthio(C)@4; iTRAQ8plex(K)@7		0.00287354	1434.77	479.264	1434.77	479.263	3	9	43.1.1.1054.7	0	12.6633	49698	12.6465	1.27599	4.87922	1.23354	4.8614	1.03642	4.76919	760.98	26.74	880.31	29.8	898.07	30.17	0
671.34	671.34	81.33	66.47	59.83	P04114	APOB	Apolipoprotein B-100	1	auto	0.747147	99	TSQCTLK	iTRAQ8plex@N-term; Methylthio(C)@4; iTRAQ8plex(K)@7		0.007418	1433.79	717.903	1433.78	717.899	2	12	67.1.1.992.20	1	10.6748	170277	10.6817	1.08248	3.6078	1.01508	3.62139	1.06846	3.71116	1518.25	37.74	1489.97	38.96	1474.45	38.83	0
671.34	671.34	81.33	66.47	59.83	P04114	APOB	Apolipoprotein B-100	0	auto - discordant peptide type	0	45.5	TSSFAL	iTRAQ8plex@N-term	cleaved L-N@C-term	-0.00261851	928.515	465.265	928.517	465.266	2	8	63.1.1.1245.3	0	21.2906	17997	21.3701	1.19421	30.9317	1.183	30.5694	1.01143	30.5437	195.98	42.9	212.18	46.37	221.81	47.33	0
671.34	671.34	81.33	66.47	59.83	P04114	APOB	Apolipoprotein B-100	1	auto	0	99	TSSFALNLPTLPEVK	iTRAQ8plex@N-term; iTRAQ8plex(K)@15		0.000780483	2224.29	557.081	2224.29	557.081	4	14	47.1.1.1593.13	1	49.8582	84657	49.9222	0.718631	5.84299	1.00116	5.13658	0.719187	5.97249	752.01	26.51	489.94	22.83	720.3	26.91	0
671.34	671.34	81.33	66.47	59.83	P04114	APOB	Apolipoprotein B-100	1	auto	0	84.7	TTEVLR	iTRAQ8plex@N-term		-0.00212688	1021.61	511.81	1021.61	511.811	2	10	47.1.1.669.13	1	8.8422	19495	8.8608	1.26095	30.5928	1.2766	30.1936	0.989651	29.7154	194.8	42.78	222.69	47.43	237.92	49.3	0
671.34	671.34	81.33	66.47	59.83	P04114	APOB	Apolipoprotein B-100	0	auto - discordant peptide type	0	31.6	TTLTAF	iTRAQ8plex@N-term	cleaved F-G@C-term	-0.00442092	956.544	479.279	956.549	479.282	2	8	65.1.1.1031.4	0	17.4745	92980	17.4169	1.31133	4.71819	1.16104	4.81292	1.13163	4.68958	802.23	27.46	953.73	30.97	891.11	30.15	0
671.34	671.34	81.33	66.47	59.83	P04114	APOB	Apolipoprotein B-100	0	auto - discordant peptide type	0	99	TTLTAFGF	iTRAQ8plex@N-term	cleaved F-A@C-term	-0.000324935	1160.64	581.326	1160.64	581.326	2	13	75.1.1.1845.7	0	32.7331	75717	32.6517	0.567464	14.3743	0.784573	12.4148	0.724678	15.3133	295.65	23.49	152.1	18.22	221.92	21.17	0
671.34	671.34	81.33	66.47	59.83	P04114	APOB	Apolipoprotein B-100	0	auto - shared MS/MS	0.00261362	36.91	VAFVK	iTRAQ8plex@N-term; iTRAQ8plex(K)@5	cleaved I-V@N-term	-0.00691433	1170.75	586.383	1170.76	586.387	2	8	79.1.1.1039.14	0	12.5266	18356	12.6316	1.5517	23.7579	1.12711	25.5255	1.37937	23.8908	291.96	52.44	410.72	63.87	314.83	57.1	0
671.34	671.34	81.33	66.47	59.83	P04114	APOB	Apolipoprotein B-100	1	auto	0	99	VELEVPQLCSFILK	iTRAQ8plex@N-term; Methylthio(C)@9; iTRAQ8plex(K)@14		-0.00095139	2271.28	758.101	2271.28	758.102	3	18	1.1.1.2074.2	1	52.8055	9141	52.784	1.54188	16.404	1.53781	16.248	1.00459	15.0615	61.58	7.62	86.08	9.27	90.6	9.54	0
671.34	671.34	81.33	66.47	59.83	P04114	APOB	Apolipoprotein B-100	0	auto - shared MS/MS	0	36.54	VGSK	iTRAQ8plex@N-term; iTRAQ8plex(K)@4	cleaved H-V@N-term	-0.00603235	997.632	499.823	997.638	499.826	2	6	66.1.1.839.8	0	8.0371	13699	7.9633	1.15697	23.8665	1.09585	23.872	1.05782	24.0486	167.28	28.02	175.46	29.83	175.38	29.83	0
671.34	671.34	81.33	66.47	59.83	P04114	APOB	Apolipoprotein B-100	1	auto	0	99	VHELIER	iTRAQ8plex@N-term		-0.000836643	1198.7	400.573	1198.7	400.573	3	11	10.1.1.1143.2	1	11.3279	1027718	11.4095	1.09796	3.32147	0.89546	3.47605	1.22851	3.54223	1774.95	40.8	1766.79	42.36	1520.61	39.65	0
671.34	671.34	81.33	66.47	59.83	P04114	APOB	Apolipoprotein B-100	0	auto - discordant peptide type	0	99	VIGNMGQTMEQLTPELK	iTRAQ8plex@N-term; Deamidated(N)@4; iTRAQ8plex(K)@17		0.0188896	2497.36	625.347	2497.34	625.342	4	11	3.1.1.1793.7	0	30.182	5845	30.1568	0.998972	24.1608	1.44687	21.531	0.691773	22.8306	178.19	28.9	161.38	28.9	246.66	34.93	0
671.34	671.34	81.33	66.47	59.83	P04114	APOB	Apolipoprotein B-100	0	auto - discordant peptide type	0	99	VIGNMGQTMEQLTPELK	iTRAQ8plex@N-term; Deamidated(Q)@11; iTRAQ8plex(K)@17		-0.0013189	2497.34	625.341	2497.34	625.342	4	13	1.1.1.1553.5	0	29.4682	20157	29.4527	1.3945	20.0652	1.64321	19.1317	0.850286	18.2423	215.82	31.86	272.85	37.08	339.29	41.29	0
671.34	671.34	81.33	66.47	59.83	P04114	APOB	Apolipoprotein B-100	0	auto - discordant peptide type	0	72.81	VIGNMGQTMEQLTPELK	iTRAQ8plex@N-term; Deamidated(Q)@7; Oxidation(M)@9; Deamidated(Q)@11; iTRAQ8plex(K)@17		0.00230737	2514.32	839.114	2514.32	839.113	3	12	3.1.1.1526.20	0	18.2223	5565	18.1835	0.321409	24.7203	0.395487	21.2371	0.814266	28.9017	821.31	87.46	239.32	53.39	310.76	57.1	0
671.34	671.34	81.33	66.47	59.83	P04114	APOB	Apolipoprotein B-100	1	auto	2	99	VIGNMGQTMEQLTPELK	iTRAQ8plex@N-term; iTRAQ8plex(K)@17		-0.00248218	2496.35	833.125	2496.35	833.125	3	17	2.1.1.1539.15	1	28.8903	20160	28.8955	0.526474	29.2191	0.929885	23.157	0.567268	30.014	190.74	29.83	91.04	22.47	169.69	28.98	0
671.34	671.34	81.33	66.47	59.83	P04114	APOB	Apolipoprotein B-100	0	auto - discordant peptide type	0	99	VIGNMGQTMEQLTPELK	iTRAQ8plex@N-term; Oxidation(M)@5; iTRAQ8plex(K)@17		-0.00720516	2512.34	629.093	2512.35	629.095	4	12	2.1.1.1303.7	0	18.2028	59612	18.1392	1.01119	3.89982	0.674637	4.35578	1.50177	4.50131	1346.4	35.52	1234.3	35.45	869.02	30.12	0
671.34	671.34	81.33	66.47	59.83	P04114	APOB	Apolipoprotein B-100	0	auto - discordant peptide type	0	99	VIGNMGQTMEQLTPELK	iTRAQ8plex@N-term; Oxidation(M)@9; iTRAQ8plex(K)@17		-0.00314456	2512.35	838.456	2512.35	838.457	3	19	2.1.1.1303.21	0	18.2262	53862	18.1853	0.437237	6.26139	0.436791	6.01429	1.00296	7.48158	960.93	29.93	380.91	20.69	401.56	20.66	0
671.34	671.34	81.33	66.47	59.83	P04114	APOB	Apolipoprotein B-100	1	auto	0.0245682	85.28	VIGTLK	iTRAQ8plex@N-term; iTRAQ8plex(K)@6		-0.00432911	1237.82	619.916	1237.82	619.918	2	10	81.1.1.1064.19	1	14.325	190284	14.3784	1.37316	18.1096	1.02487	19.3883	1.34243	18.7118	531.69	70.71	661.9	81.36	521.33	73.55	0
671.34	671.34	81.33	66.47	59.83	P04114	APOB	Apolipoprotein B-100	0	auto - shared MS/MS	0.00348833	43.58	VLADK	iTRAQ8plex@N-term; iTRAQ8plex(K)@5		-0.00385028	1152.73	577.372	1152.73	577.374	2	8	35.1.1.1009.19	0	10.7209	44145	10.6409	0.663698	19.6882	0.776704	18.1715	0.856161	21.2234	698.88	80.81	420.52	67.01	519.33	72.8	0
671.34	671.34	81.33	66.47	59.83	P04114	APOB	Apolipoprotein B-100	0	auto - discordant peptide type	0	99	VLLDQLGTTISFER	iTRAQ8plex@N-term; iTRAQ8plex(S)@11		0.000943787	2199.27	550.826	2199.27	550.825	4	15	45.1.1.1794.2	0	45.7122	10585	45.7458	1.05899	23.2274	1.6423	20.4937	0.646072	21.3753	111.97	17.75	107.5	18.25	175.93	22.85	0
671.34	671.34	81.33	66.47	59.83	P04114	APOB	Apolipoprotein B-100	0	auto - discordant peptide type	0	99	VLVDHFGY	iTRAQ8plex@N-term	cleaved Y-T@C-term	-0.00348581	1252.67	627.343	1252.68	627.345	2	12	13.1.1.1299.6	0	18.7457	15320	18.751	0.765153	20.0579	0.895011	18.6052	0.856564	21.0139	121.9	15.1	84.56	13.34	104.38	14.49	0
671.34	671.34	81.33	66.47	59.83	P04114	APOB	Apolipoprotein B-100	0	auto - discordant peptide type	0	96.08	VLVDHFGYTK	Carbamyl@N-term; iTRAQ8plex(K)@10		0.00286006	1524.83	509.283	1524.82	509.282	3	12	32.1.1.1341.4	0	19.7985	21383	19.7882	0.853125	8.49753	1.00713	7.91436	0.848727	8.69974	316.25	17.2	244.6	15.97	304.72	17.52	0
671.34	671.34	81.33	66.47	59.83	P04114	APOB	Apolipoprotein B-100	0	auto - discordant peptide type	0	99	VLVDHFGYTK	iTRAQ8plex@N-term; Dehydrated(D)@4; iTRAQ8plex(K)@10		-0.00184897	1768.01	443.01	1768.01	443.011	4	15	82.1.1.1106.6	0	15.3038	109654	15.2892	0.890518	3.09281	0.766174	3.18026	1.16454	3.40485	2315.52	46.56	1869.41	43.93	1697.31	41.82	0
671.34	671.34	81.33	66.47	59.83	P04114	APOB	Apolipoprotein B-100	1	auto	0	99	VLVDHFGYTK	iTRAQ8plex@N-term; iTRAQ8plex(K)@10		6.24535e-05	1786.02	447.513	1786.02	447.513	4	17	60.1.1.1212.2	1	13.9157	582657	14.0422	0.94231	1.74082	0.945855	1.70928	0.998182	1.81846	7790.74	85.43	6674.54	82.93	7068.77	85	362.5
671.34	671.34	81.33	66.47	59.83	P04114	APOB	Apolipoprotein B-100	0	auto - discordant peptide type	0	99	VLVDHFGYTK	iTRAQ8plex@N-term; iTRAQ8plex(Y)@8; iTRAQ8plex(K)@10		-0.00360439	2090.23	523.564	2090.23	523.565	4	12	69.1.1.1068.12	0	14.0902	128361	14.2432	0.82718	3.52934	1.34511	3.00899	0.616145	3.3992	1879.78	41.94	1409.68	38.55	2419.08	48.84	0
671.34	671.34	81.33	66.47	59.83	P04114	APOB	Apolipoprotein B-100	0	auto - discordant peptide type	0	26.45	VNLVK	iTRAQ8plex@N-term; Deamidated(N)@2; iTRAQ8plex(K)@5		-0.00402128	1180.76	591.387	1180.76	591.389	2	8	44.1.1.1062.18	0	13.043	154908	12.7398	1.01319	5.00308	0.652433	5.6834	1.55595	5.864	817.21	27.68	750.65	27.64	510.1	23.28	0
671.34	671.34	81.33	66.47	59.83	P04114	APOB	Apolipoprotein B-100	0	auto - shared MS/MS	0.00612309	58.71	VNLVK	iTRAQ8plex@N-term; iTRAQ8plex(K)@5		-0.00470332	1179.78	590.895	1179.78	590.897	2	8	70.1.1.1017.18	0	11.6434	292506	11.7873	0.872317	2.98462	0.819262	2.98671	1.06682	3.22517	2521.01	48.58	1993.71	45.44	1975.98	45.09	0
671.34	671.34	81.33	66.47	59.83	P04114	APOB	Apolipoprotein B-100	1	auto	0	99	VNQNLVYESGSLNFSK	iTRAQ8plex@N-term; iTRAQ8plex(K)@16		0.00326341	2406.3	803.109	2406.3	803.107	3	22	41.1.1.1295.6	1	18.4019	122557	18.2766	1.02324	11.7995	1.07948	11.4271	0.949741	11.9169	293.36	23.45	272.14	23.62	302.97	24.74	0
671.34	671.34	81.33	66.47	59.83	P04114	APOB	Apolipoprotein B-100	1	auto	2	99	VPQTDMTFR	iTRAQ8plex@N-term		-0.00104682	1397.73	699.871	1397.73	699.871	2	14	48.1.1.648.19	1	12.6793	923270	12.8182	0.810639	12.2488	0.761504	12.2264	1.06658	13.4262	784.52	60.58	576.56	54.82	571.56	54.18	0
671.34	671.34	81.33	66.47	59.83	P04114	APOB	Apolipoprotein B-100	0	auto - discordant peptide type	0	71.45	VPQTDMTFR	iTRAQ8plex@N-term; Deamidated(Q)@3		0.0173985	1398.73	700.372	1398.71	700.363	2	10	46.1.1.1060.15	0	12.9797	435841	12.8139	0.753014	6.26795	1.09282	5.47061	0.69039	6.29886	633.08	24.33	432.19	21.4	661.9	25.77	0
671.34	671.34	81.33	66.47	59.83	P04114	APOB	Apolipoprotein B-100	0	auto - discordant peptide type	0	98.98	VPQTDMTFR	iTRAQ8plex@N-term; Oxidation(M)@6		0.00900115	1413.73	472.251	1413.72	472.248	3	11	44.1.1.1005.7	0	10.4821	389339	10.691	0.895424	4.19893	1.07841	3.90063	0.831923	4.23628	1257.03	34.31	1020.44	32.56	1296.93	36.14	0
671.34	671.34	81.33	66.47	59.83	P04114	APOB	Apolipoprotein B-100	1	auto	0	99	VPSYTLILPSLELPVLHVPR	iTRAQ8plex@N-term		0.00291641	2546.52	637.637	2546.51	637.636	4	19	80.1.1.2308.11	1	69.5006	35212	69.5225	0.663144	15.8839	1.08807	13.2223	0.610648	15.9456	108.1	10.05	64.99	8.37	112.53	10.58	0
671.34	671.34	81.33	66.47	59.83	P04114	APOB	Apolipoprotein B-100	0	auto - discordant peptide type	0	16.62	VPSYTLILPSLELPVLHVPR	iTRAQ8plex@N-term; Deamidated(R)@20		0.0260662	2547.52	637.888	2547.5	637.882	4	10	82.1.1.2328.7	0	69.5298	28536	69.5134	1.82903	8.51376	3.21487	7.67686	0.570031	6.57025	213.92	14.21	354.72	18.89	657.96	25.32	0
671.34	671.34	81.33	66.47	59.83	P04114	APOB	Apolipoprotein B-100	0	auto - discordant peptide type	0	97.23	VPSYTLILPSLELPVLHVPR	iTRAQ8plex@N-term; iTRAQ8plex(T)@5		0.00668518	2850.73	571.153	2850.72	571.151	5	14	82.1.1.2108.8	0	59.809	14906	59.7916	1.76017	15.5213	0.534584	22.6149	3.29897	21.4564	64.64	7.81	103.15	10.05	33.06	6.32	0
671.34	671.34	81.33	66.47	59.83	P04114	APOB	Apolipoprotein B-100	1	auto	0	99	VQGVEFSHR	iTRAQ8plex@N-term		0.00101977	1361.74	454.92	1361.74	454.919	3	13	59.1.1.1141.6	1	10.8996	1154741	10.9766	1.16878	2.94577	1.03104	3.00714	1.13579	3.01973	2182.9	45.27	2313.03	48.39	2153.26	46.89	0
671.34	671.34	81.33	66.47	59.83	P04114	APOB	Apolipoprotein B-100	0	auto - discordant peptide type	0	99	VQGVEFSHR	iTRAQ8plex@N-term; Deamidated(Q)@2		-0.000678181	1362.72	455.247	1362.72	455.247	3	13	21.1.1.1027.4	0	10.8967	118299	10.8377	1.26342	5.62116	0.881538	6.16794	1.43597	6.07829	574.79	23.24	658.37	25.71	484.77	22.58	0
671.34	671.34	81.33	66.47	59.83	P04114	APOB	Apolipoprotein B-100	0	auto - discordant peptide type	0	99	VSALLTPAEQTGTWK	iTRAQ8plex@N-term; Deamidated(Q)@10; iTRAQ8plex(K)@15		0.0174435	2210.26	737.76	2210.24	737.754	3	21	47.1.1.1389.19	0	40.7775	57924	40.6974	1.13394	2.82763	0.871589	3.01742	1.30353	3.0491	2405.25	47.51	2472.66	50.03	2005.66	45.75	0
671.34	671.34	81.33	66.47	59.83	P04114	APOB	Apolipoprotein B-100	1	auto	0	99	VSALLTPAEQTGTWK	iTRAQ8plex@N-term; iTRAQ8plex(K)@15		0.000202068	2209.26	737.426	2209.26	737.426	3	19	46.1.1.1682.20	1	40.5152	369088	40.885	0.431015	9.8186	1.05739	6.85804	0.40841	9.85901	403.27	19.39	157.58	13.49	407.96	19.95	0
671.34	671.34	81.33	66.47	59.83	P04114	APOB	Apolipoprotein B-100	0	auto - discordant peptide type	0	97.6	VSALLTPAEQTGTWK	iTRAQ8plex@N-term; Oxidation(W)@14; iTRAQ8plex(K)@15		-0.00401048	2225.25	557.319	2225.25	557.32	4	13	48.1.1.1195.3	0	36.742	6761	36.727	0.84526	25.1374	0.928236	23.9055	0.912373	26.236	108.99	17.49	83.52	16.16	96.79	17.15	0
671.34	671.34	81.33	66.47	59.83	P04114	APOB	Apolipoprotein B-100	1	auto	0	99	VSQEGLK	iTRAQ8plex@N-term; iTRAQ8plex(K)@7		-0.00475321	1367.82	456.947	1367.82	456.948	3	10	36.1.1.974.8	1	9.0612	306720	9.0441	1.04744	17.7318	1.10678	17.1615	0.948224	17.7878	640.98	77.52	608.68	78.93	678.72	82.64	0
671.34	671.34	81.33	66.47	59.83	P04114	APOB	Apolipoprotein B-100	1	auto	0	99	VSSFYAK	iTRAQ8plex@N-term; iTRAQ8plex(K)@7		-0.00173233	1408.82	705.415	1408.82	705.416	2	12	71.1.1.1060.19	1	13.5871	148387	13.7302	0.873308	20.3266	1.05375	18.8276	0.830363	20.5918	544.79	71.41	431.33	67.01	549.23	74.23	0
671.34	671.34	81.33	66.47	59.83	P04114	APOB	Apolipoprotein B-100	1	auto	0	99	VSTAFVYTK	iTRAQ8plex@N-term; iTRAQ8plex(K)@9		-0.00122303	1622.95	541.99	1622.95	541.99	3	12	72.1.1.1138.9	1	17.0034	1212020	17.1625	0.719113	2.59624	0.880896	2.37091	0.817924	2.72758	3798.56	59.59	2476.45	51.23	3201.32	56.91	0
671.34	671.34	81.33	66.47	59.83	P04114	APOB	Apolipoprotein B-100	1	auto	0.280669	98.9	VSTAFVYTKNPNGYSFSIPVK	iTRAQ8plex@N-term; iTRAQ8plex(K)@9; iTRAQ8plex(K)@21	missed K-N@9	0.00149883	3230.81	647.17	3230.81	647.169	5	12	68.1.1.1627.15	1	39.0075	24475	38.9779	0.886969	23.7799	0.846268	23.6862	1.05012	25.4982	393.05	60.66	316.06	57.18	318.23	57.18	0
671.34	671.34	81.33	66.47	59.83	P04114	APOB	Apolipoprotein B-100	0	auto - discordant peptide type	0	56.31	VTQEFHMK	iTRAQ8plex@N-term; Deamidated(Q)@3; iTRAQ8plex(K)@8		-0.00242702	1627.88	407.978	1627.89	407.979	4	9	15.1.1.1159.2	0	12.2574	49347	12.2477	0.809707	4.75012	0.931912	4.45114	0.870549	4.94902	1046.39	31.29	768.13	28.35	932.94	30.76	0
671.34	671.34	81.33	66.47	59.83	P04114	APOB	Apolipoprotein B-100	0	auto - discordant peptide type	0	19.42	VTQEFHMK	iTRAQ8plex@N-term; Deamidated(Q)@3; Oxidation(M)@7; iTRAQ8plex(K)@8		-0.0176891	1643.86	548.962	1643.88	548.967	3	9	49.1.1.552.15	0	9.7876	5929	9.8028	0.511381	28.2868	0.809892	23.1827	0.632642	29.8131	415.84	62.29	192.79	46.26	322.21	57.01	0
671.34	671.34	81.33	66.47	59.83	P04114	APOB	Apolipoprotein B-100	1	auto	2	99	VTQEFHMK	iTRAQ8plex@N-term; iTRAQ8plex(K)@8		-0.00391522	1626.9	543.306	1626.9	543.308	3	14	57.1.1.786.11	1	11.1745	355763	11.1501	0.981262	1.93525	0.783393	2.043	1.255	2.13455	5572.73	72.26	4957.54	71.22	4176.7	65.94	0
671.34	671.34	81.33	66.47	59.83	P04114	APOB	Apolipoprotein B-100	0	auto - discordant peptide type	0	63.33	VTQEFHMK	iTRAQ8plex@N-term; Oxidation(M)@7; iTRAQ8plex(K)@8		-0.00215071	1642.89	548.639	1642.9	548.639	3	10	50.1.1.979.18	0	9.8006	29188	9.7658	1.67184	20.8594	1.28825	22.0514	1.30028	20.1851	366.93	58.82	556.15	74.23	452.24	68.48	0
671.34	671.34	81.33	66.47	59.83	P04114	APOB	Apolipoprotein B-100	1	auto	0.000869459	18.73	WACPR	iTRAQ8plex@N-term; Methylthio(C)@3		-0.00083426	981.482	491.748	981.483	491.749	2	7	84.1.1.961.9	1	13.8535	20963	13.8788	1.99009	4.96762	1.31227	5.4319	1.51946	4.77997	603.81	23.9	1089.4	32.7	758.07	28.2	0
671.34	671.34	81.33	66.47	59.83	P04114	APOB	Apolipoprotein B-100	0	auto - shared MS/MS	0.0172766	80.14	WKNEVR	iTRAQ8plex@N-term; iTRAQ8plex(K)@2	missed K-N@2	-0.00536888	1438.85	480.622	1438.85	480.624	3	9	60.1.1.1144.6	0	10.8451	225771	10.7853	0.954958	3.46822	0.97432	3.38441	0.982025	3.58957	1767.65	40.69	1530.36	39.7	1647.72	40.88	0
671.34	671.34	81.33	66.47	59.83	P04114	APOB	Apolipoprotein B-100	0	auto - discordant peptide type	0.00217692	93.3	WNFYYSPQ	iTRAQ8plex@N-term	cleaved Q-S@C-term	0.0055688	1407.68	704.848	1407.68	704.846	2	11	60.1.1.1461.15	0	24.9771	52294	25.0818	2.22882	9.43896	0.881729	11.9225	2.53268	10.6322	160.39	12.33	324.09	17.75	135.3	12.33	0
671.34	671.34	81.33	66.47	59.83	P04114	APOB	Apolipoprotein B-100	1	auto	0	99	WNFYYSPQSSPDK	iTRAQ8plex@N-term; iTRAQ8plex(K)@13		0.00280274	2226.12	743.048	2226.12	743.047	3	15	33.1.1.1310.8	1	18.807	94739	18.9523	0.884182	23.9669	1.05287	22.3375	0.841407	24.3241	194.4	30.17	155.83	28.46	195.82	31.46	0
671.34	671.34	81.33	66.47	59.83	P04114	APOB	Apolipoprotein B-100	0	auto - discordant peptide type	2	99	WNFYYSPQSSPDKK	iTRAQ8plex@N-term; Deamidated(Q)@8; iTRAQ8plex(K)@13; iTRAQ8plex(K)@14	missed K-K@13	0.00368607	2659.41	665.859	2659.41	665.859	4	12	30.1.1.1290.4	0	22.9422	12000	23.0351	0.582815	12.0765	0.647314	11.1953	0.902102	13.4127	204.57	13.82	108.09	10.82	126.69	11.31	0
671.34	671.34	81.33	66.47	59.83	P04114	APOB	Apolipoprotein B-100	1	auto	0	99	WNFYYSPQSSPDKK	iTRAQ8plex@N-term; iTRAQ8plex(K)@13; iTRAQ8plex(K)@14	missed K-K@13	0.00501048	2658.43	887.149	2658.42	887.148	3	14	56.1.1.983.20	1	17.2931	54628	17.2999	0.86787	17.3203	0.906248	16.7455	0.959507	18.2119	773.41	85.09	609.77	79.56	671.5	82.64	10.4
671.34	671.34	81.33	66.47	59.83	P04114	APOB	Apolipoprotein B-100	0	auto - discordant peptide type	0	43.26	YDKNQDVH	iTRAQ8plex@N-term; iTRAQ8plex(K)@3	cleaved H-S@C-term; missed K-N@3	-0.00066153	1625.86	542.961	1625.86	542.961	3	8	14.1.1.1074.12	0	8.512	16091	8.7081	1.04709	25.7459	0.683942	29.1415	1.53394	29.8798	151.45	26.65	143.77	27.02	99.1	23.02	0
671.34	671.34	81.33	66.47	59.83	P04114	APOB	Apolipoprotein B-100	0	auto - shared MS/MS	0.000869459	15.98	YELK	iTRAQ8plex@N-term; iTRAQ8plex(K)@4		-0.00270634	1159.7	580.859	1159.71	580.86	2	5	35.1.1.987.5	0	9.7304	111259	9.6286	2.93279	28.7021	3.20562	28.2242	0.916663	20.7657	160.43	39.12	426.56	64.58	492.02	69.93	0
671.34	671.34	81.33	66.47	59.83	P04114	APOB	Apolipoprotein B-100	0	auto - discordant peptide type	0.00217692	94.14	YENYELTLK	iTRAQ8plex@N-term; iTRAQ8plex(Y)@1; iTRAQ8plex(K)@9		-0.00482501	2084.19	522.054	2084.19	522.055	4	11	29.1.1.1182.10	0	18.1411	14198	18.1196	0.379505	31.1759	0.939042	21.2665	0.404923	31.7599	448.53	64.65	154.32	42.66	402.96	63.01	0
671.34	671.34	81.33	66.47	59.83	P04114	APOB	Apolipoprotein B-100	0	auto - discordant peptide type	0	25.36	YENYELTLK	iTRAQ8plex@N-term; iTRAQ8plex(Y)@4; iTRAQ8plex(K)@9		-0.00505617	2084.19	522.054	2084.19	522.055	4	9	30.1.1.1183.9	0	18.2111	15025	18.2363	1.10396	21.6964	0.609022	26.1032	1.81619	26.4287	413.6	62.29	413.95	64.65	240.99	51.38	0
671.34	671.34	81.33	66.47	59.83	P04114	APOB	Apolipoprotein B-100	0	auto - discordant peptide type	0	99	YGMVAQVTQTLK	iTRAQ8plex@N-term; Deamidated(Q)@6; iTRAQ8plex(K)@12		-0.000693729	1947.1	650.039	1947.1	650.039	3	14	49.1.1.1348.10	0	45.1063	37185	45.0421	0.947073	29.8848	1.30986	26.8116	0.724432	28.8459	240.19	47.43	206.23	46.26	301	54.59	0
671.34	671.34	81.33	66.47	59.83	P04114	APOB	Apolipoprotein B-100	0	auto - discordant peptide type	0	99	YGMVAQVTQTLK	iTRAQ8plex@N-term; Deamidated(Q)@9; iTRAQ8plex(K)@12		-0.000496481	1947.1	650.039	1947.1	650.039	3	14	44.1.1.1740.5	0	43.3428	23396	43.3194	1.10504	6.77273	1.46876	6.20967	0.753821	6.36851	427.45	20.02	428.23	20.95	600.65	24.49	0
671.34	671.34	81.33	66.47	59.83	P04114	APOB	Apolipoprotein B-100	1	auto	0	99	YGMVAQVTQTLK	iTRAQ8plex@N-term; iTRAQ8plex(K)@12		-0.000171955	1946.11	487.535	1946.11	487.535	4	14	67.1.1.1626.4	1	38.9699	173926	38.8672	0.537851	3.76396	0.84691	3.10198	0.636305	3.93825	2254.41	45.87	1099.28	34.81	1826.65	42.77	0
671.34	671.34	81.33	66.47	59.83	P04114	APOB	Apolipoprotein B-100	0	auto - discordant peptide type	0	99	YGMVAQVTQTLK	iTRAQ8plex@N-term; Oxidation(M)@3; Deamidated(Q)@9; iTRAQ8plex(K)@12		0.00966378	1963.1	655.374	1963.09	655.371	3	12	62.1.1.1185.14	0	18.7471	43993	19.0735	1.33993	21.083	1.27986	21.1228	1.04896	20.444	198.91	30.58	241.63	34.86	243.56	35.28	0
671.34	671.34	81.33	66.47	59.83	P04114	APOB	Apolipoprotein B-100	0	auto - discordant peptide type	0	99	YGMVAQVTQTLK	iTRAQ8plex@N-term; Oxidation(M)@3; iTRAQ8plex(K)@12		-0.0025887	1962.1	655.042	1962.11	655.043	3	13	67.1.1.1167.12	0	18.4291	38298	18.4055	0.721408	31.2517	1.22935	25.9768	0.587959	30.6737	263.14	49.6	172.1	42.9	309.49	55.32	0
671.34	671.34	81.33	66.47	59.83	P04114	APOB	Apolipoprotein B-100	0	auto - discordant peptide type	0	89.27	YGMVAQVTQTLK	No iTRAQ8plex@N-term; iTRAQ8plex(K)@12		0.0010066	1641.91	548.31	1641.91	548.31	3	11	68.1.1.1208.9	0	20.2014	28133	20.2267	1.27882	20.1658	1.21043	20.1863	1.05855	19.7931	444.87	64.65	515.77	72.11	515.18	72.18	0
671.34	671.34	81.33	66.47	59.83	P04114	APOB	Apolipoprotein B-100	1	auto	0	99	YHWEHTGLTLR	iTRAQ8plex@N-term		0.00134776	1715.91	429.984	1715.91	429.984	4	15	70.1.1.1046.5	1	12.9022	48580	12.8465	0.999037	6.6714	1.44493	5.95533	0.692746	6.31339	467.34	20.93	423.28	20.93	646.05	25.36	0
671.34	671.34	81.33	66.47	59.83	P04114	APOB	Apolipoprotein B-100	0	auto - discordant peptide type	0	99	YHWEHTGLTLR	iTRAQ8plex@N-term; iTRAQ8plex(Y)@1		0.00337088	2020.11	1011.06	2020.11	1011.06	2	12	71.1.1.1010.21	0	11.3846	34263	11.3899	0.450532	14.4931	0.656586	12.0038	0.687502	15.7487	175.86	12.81	71.83	9	110.47	10.54	0
671.34	671.34	81.33	66.47	59.83	P04114	APOB	Apolipoprotein B-100	1	auto	0.00392635	46.41	YKAEK	iTRAQ8plex@N-term; iTRAQ8plex(K)@2; iTRAQ8plex(K)@5	missed K-A@2	-0.00716925	1549.95	517.658	1549.96	517.66	3	8	52.1.1.1093.16	1	9.6816	141405	9.6494	0.637774	2.63456	0.577369	2.65153	1.10676	3.05073	4004.77	61.16	2315.57	49.71	2212.16	47.95	0
671.34	671.34	81.33	66.47	59.83	P04114	APOB	Apolipoprotein B-100	1	auto	0	98.44	YLRTEHGSEMLFFGNAIEGK	iTRAQ8plex@N-term; iTRAQ8plex(K)@20	missed R-T@3	0.00397501	2906.53	582.312	2906.52	582.311	5	10	15.1.1.1361.9	1	21.1589	11761	21.1841	1.72862	29.3189	1.55016	29.7701	1.11729	26.777	183.37	41.59	287.37	53.39	271.95	52.44	0
671.34	671.34	81.33	66.47	59.83	P04114	APOB	Apolipoprotein B-100	0	auto - discordant peptide type	0	93.37	YNALDLTNNGK	iTRAQ8plex@N-term; Ammonia-loss(N)@9; iTRAQ8plex(K)@11		0.00588098	1812.99	605.337	1812.98	605.335	3	13	41.1.1.1206.16	0	14.4688	27312	14.571	1.20935	25.2166	1.17815	25.0614	1.02848	24.9537	292.86	52.44	321.09	57.01	330.1	57.88	0
671.34	671.34	81.33	66.47	59.83	P04114	APOB	Apolipoprotein B-100	1	auto	0	99	YNALDLTNNGK	iTRAQ8plex@N-term; iTRAQ8plex(K)@11		-0.00584897	1830	611.009	1830.01	611.01	3	14	38.1.1.1186.18	1	13.667	52985	13.6772	0.882931	19.6843	1.04978	18.3231	0.842688	19.9652	576.78	73.48	461.69	69.28	579.29	76.29	0
671.34	671.34	81.33	66.47	59.83	P04114	APOB	Apolipoprotein B-100	0	auto - discordant peptide type	0	28.15	YNALDLTNNGK	iTRAQ8plex@N-term; Methyl(N)@9; iTRAQ8plex(K)@11		-0.0230097	1844	615.675	1844.03	615.682	3	11	41.1.1.1184.17	0	13.4991	22457	13.511	4.41532	28.5595	3.34917	29.4393	1.32089	19.3892	147.98	37.82	592.35	75.5	474.16	69.28	0
671.34	671.34	81.33	66.47	59.83	P04114	APOB	Apolipoprotein B-100	0	auto - shared MS/MS	0.00612309	58.06	YTLNK	iTRAQ8plex@N-term; iTRAQ8plex(K)@5		-0.00545701	1245.75	416.257	1245.75	416.259	3	8	65.1.1.887.5	0	10.9929	778146	11.0247	1.16313	1.58774	0.936335	1.66756	1.24463	1.67568	7527.07	84.05	7937.23	89.59	6742.84	83.51	0
547.38	547.95	96.88	94.09	93.6	P02768	ALB	Serum albumin	0	auto - discordant peptide type	0	99	AAADPHECYAK	iTRAQ8plex@N-term; Methylthio(C)@8; iTRAQ8plex(K)@11	cleaved C-A@N-term	-0.00414261	1828.9	458.233	1828.91	458.234	4	13	13.1.1.1124.4	0	10.9587	567017	10.8576	2.23276	6.91279	2.99053	6.55281	0.748057	5.26404	300.72	16.88	608.72	24.56	860.39	29.09	0
547.38	547.95	96.88	94.09	93.6	P02768	ALB	Serum albumin	0	auto - discordant peptide type	0	38.89	AAADPHECYAK	iTRAQ8plex@N-term; Methylthio(C)@8; iTRAQ8plex(Y)@9; iTRAQ8plex(K)@11	cleaved C-A@N-term	-0.00779722	2133.1	534.283	2133.11	534.285	4	11	35.1.1.984.15	0	9.6134	40251	9.5826	1.81942	4.10431	2.06833	3.96836	0.881359	3.46904	918.23	29.44	1514.6	38.81	1817.01	42.49	0
547.38	547.95	96.88	94.09	93.6	P02768	ALB	Serum albumin	0	auto - discordant peptide type	0	99	AAADPHECYAK	No iTRAQ8plex@N-term; Methylthio(C)@8; iTRAQ8plex(K)@11	cleaved C-A@N-term	-0.00431077	1524.7	763.356	1524.7	763.358	2	15	14.1.1.1213.20	0	14.7501	21972	14.6691	6.5351	16.8082	11.4011	16.2385	0.574307	7.89231	40.63	6.32	240.72	15.33	443.18	20.66	0
547.38	547.95	96.88	94.09	93.6	P02768	ALB	Serum albumin	0	auto - discordant peptide type	0	34.53	AACLL	iTRAQ8plex@N-term; Methylthio(C)@3	cleaved L-P@C-term	-0.00256682	839.453	420.734	839.455	420.735	2	6	75.1.1.1730.2	0	27.5637	87264	27.7775	4.8529	19.6265	5.95308	19.2258	0.816769	11.2702	30.93	5.48	136.08	11.49	176.16	13.15	0
547.38	547.95	96.88	94.09	93.6	P02768	ALB	Serum albumin	0	auto - discordant peptide type	0	29.93	AACLLP	iTRAQ8plex@N-term; Methylthio(C)@3	cleaved P-K@C-term	-0.0027021	936.505	469.26	936.508	469.261	2	7	74.1.1.1752.3	0	29.7074	39589	29.8745	1.86034	10.9358	1.84226	10.857	1.01177	9.48642	128.1	11	216.05	14.63	225.78	15	0
547.38	547.95	96.88	94.09	93.6	P02768	ALB	Serum albumin	0	auto - discordant peptide type	0	97.57	AACLLPK	Carbamyl@N-term; Methylthio(C)@3; iTRAQ8plex(K)@7		-0.0026481	1107.61	554.81	1107.61	554.812	2	10	76.1.1.1582.10	0	36.6077	23017	36.6313	4.66065	16.818	6.18255	16.3519	0.755299	9.65708	42.34	6.4	178.9	13.19	250.44	15.62	0
547.38	547.95	96.88	94.09	93.6	P02768	ALB	Serum albumin	0	auto - discordant peptide type	0	22.31	AACLLPK	Delta:H(2)C(2)@N-term; Methylthio(C)@3; iTRAQ8plex(K)@7		-0.00236822	1090.62	546.315	1090.62	546.317	2	9	80.1.1.1215.19	0	20.6794	40348	20.4674	1.42166	12.6982	2.55414	11.1611	0.557688	10.5131	107.35	10.05	138.36	11.87	262.32	15.94	0
547.38	547.95	96.88	94.09	93.6	P02768	ALB	Serum albumin	0	auto - discordant peptide type	0	20.92	AACLLPK	Formyl@N-term; Methylthio(C)@3; iTRAQ8plex(K)@7		-0.00183366	1092.6	547.305	1092.6	547.306	2	9	77.1.1.1536.9	0	34.7966	96842	35.1288	4.02365	12.9999	3.35974	13.2527	1.19993	8.91394	72.69	8.37	265.16	16	233.65	15.33	0
547.38	547.95	96.88	94.09	93.6	P02768	ALB	Serum albumin	1	auto	0	99	AACLLPK	iTRAQ8plex@N-term; Methylthio(C)@3; iTRAQ8plex(K)@7		-0.00445951	1368.8	685.409	1368.81	685.411	2	11	86.1.1.1344.19	1	24.6013	81241	24.8239	2.95819	32.4021	4.22897	30.8286	0.700859	21.9969	62.9	17.32	168.69	28.81	254.49	35.28	0
547.38	547.95	96.88	94.09	93.6	P02768	ALB	Serum albumin	0	auto - discordant peptide type	0	43.85	AACLLPK	iTRAQ8plex@N-term; Methylthio(C)@3; Methyl(L)@5; iTRAQ8plex(K)@7		-0.00566964	1382.82	692.416	1382.82	692.419	2	11	83.1.1.1052.19	0	15.961	171591	16.0135	23.4226	11.3946	33.5281	11.3212	0.699951	2.89052	90.4	10.1	1919.63	42.97	2899.76	53.03	0
547.38	547.95	96.88	94.09	93.6	P02768	ALB	Serum albumin	0	auto - discordant peptide type	0	22.49	AACLLPK	iTRAQ8plex@N-term; Methylthio(C)@3; Pro->pyro-Glu(P)@6; iTRAQ8plex(K)@7		0.0189265	1382.81	692.41	1382.79	692.401	2	10	84.1.1.1139.12	0	21.7045	16329	21.6693	4.35757	34.1942	4.54659	33.9482	0.960283	21.3652	51.77	15.81	204.52	31.46	225.19	33.39	0
547.38	547.95	96.88	94.09	93.6	P02768	ALB	Serum albumin	0	auto - discordant peptide type	0	16.57	AACLLPK	No iTRAQ8plex@N-term; Methylthio(C)@3; iTRAQ8plex(K)@7		-0.00158304	1064.6	533.308	1064.6	533.309	2	8	83.1.1.1115.5	0	18.7105	22376	18.7291	2.33109	31.7289	2.91239	30.4332	0.801954	24.1745	42.17	10.95	89.12	16.25	117.5	18.65	0
547.38	547.95	96.88	94.09	93.6	P02768	ALB	Serum albumin	0	auto - discordant peptide type	0	89.01	AACLLPKLDELR	iTRAQ8plex@N-term; Methylthio(C)@3; No iTRAQ8plex(K)@7	missed K-L@7	-0.000683159	1690.94	564.654	1690.94	564.654	3	13	48.1.1.1390.9	0	45.5083	22487	45.5774	0.676217	30.3189	1.25562	24.4458	0.539594	29.6537	293.22	52.35	179.76	44.05	352.24	58.82	0
547.38	547.95	96.88	94.09	93.6	P02768	ALB	Serum albumin	1	auto	0	99	AACLLPKLDELRDEGK	iTRAQ8plex@N-term; Methylthio(C)@3; iTRAQ8plex(K)@7; iTRAQ8plex(K)@16	missed K-L@7; missed R-D@12	-0.00501071	2728.53	683.141	2728.54	683.142	4	11	3.1.1.1684.10	1	25.287	35276	25.3557	2.37194	25.6261	3.94499	23.7112	0.602417	18.3295	214.98	45.17	462.29	67.82	811.39	89.16	0
547.38	547.95	96.88	94.09	93.6	P02768	ALB	Serum albumin	0	auto - discordant peptide type	2	99	AACLLPKLDELRDEGK	iTRAQ8plex@N-term; Methylthio(C)@3; iTRAQ8plex(K)@7; No iTRAQ8plex(K)@16	missed K-L@7; missed R-D@12	-0.0020066	2424.33	607.09	2424.33	607.091	4	14	3.1.1.1619.7	0	22.3535	45157	22.4276	2.7542	6.16578	2.08636	6.44638	1.32265	5.06055	352.88	18.33	881.12	29.27	704.37	26.89	0
547.38	547.95	96.88	94.09	93.6	P02768	ALB	Serum albumin	0	auto - discordant peptide type	0	96.43	AACLLPKLDELRDEGK	iTRAQ8plex@N-term; Methylthio(C)@3; No iTRAQ8plex(K)@7; iTRAQ8plex(K)@16	missed K-L@7; missed R-D@12	-0.00216074	2424.33	607.09	2424.33	607.091	4	14	1.1.1.1398.4	0	22.4491	54882	22.5281	1.37837	5.65854	1.20405	5.79694	1.14699	5.57377	544.42	22.63	680.32	26.12	627.14	25.34	0
[truncated: 23,186 more rows]
[truncated: 7 more columns]

## Sheet: PP2DSL
Supplemental data S2, worksheet PP2DSL lists the shortlisted iTRAQ-quantified plasma proteins (FDR < 1%) obtained from 2D combined and 1D individual triplicate LC-MS/MS dataset. The respective iTRAQ reporter ions 114MI:113Ctrl , 115NMI:113Ctrl and 114MI:115NMI ratios for each protein were calculated and exported from ProteinPilot™ V4.1 software. Unused ProtScore > 2.02 correspond to FDR < 1% in 2…
[truncated: 55 more rows]
[truncated: 5,000 more columns]

[truncated: 1 more sheets: PP2DEnrich]
